# Supplementary material for: Photoredox cobalt dual catalysis toward C3-functionalization of quinoxalinones with alkenes and alkynes
Source: Royal Society of Chemistry journal article supplement (doi:10.1039/d4cc05374e), 2025-01-01

- Electronic Supporting Information -

***Photoredox cobalt dual catalysis toward C3-functionalization  
of quinoxalinones with alkenes and alkynes***

Karunamayee Mondal,<sup>a†</sup> Mahima Pilonia,<sup>a†</sup> Karthikeyan Jayabalan<sup>b</sup> and  
Mahiuddin Baidya<sup>a\*</sup>

<sup>a</sup>Department of Chemistry, Indian Institute of Technology Madras,  
Chennai 600036, Tamil Nadu, India

<sup>b</sup>Department of Chemistry, Sathyabama Institute of Science and Technology,  
Chennai 600119, Tamil Nadu, India

† These authors contributed equally to this work

E-mail: mbaidya@iitm.ac.in

## Table of Contents

|                                                                                                       |     |
|-------------------------------------------------------------------------------------------------------|-----|
| 1. General procedure .....                                                                            | S3  |
| 2. Plausible reaction mechanism for product 3.....                                                    | S4  |
| 3. General procedure for C3-selective coupling of quinoxalin-2(1 <i>H</i> )-one (1) with alkene ..... | S5  |
| 4. General procedure for C3-selective coupling of quinoxalin-2(1 <i>H</i> )-one (1) with alkyne ..... | S6  |
| 5. Spectral data of synthesized compounds.....                                                        | S6  |
| 6. Crystallographic experimental data.....                                                            | S25 |
| 7. Gram scale synthesis of compound 3a and 3x .....                                                   | S27 |
| 8. Post-synthetic manipulations                                                                       |     |
| a) Synthesis of compound 6.....                                                                       | S28 |
| b) Synthesis of compound 7.....                                                                       | S29 |
| 9. Mechanistic studies:                                                                               |     |
| a) Radical quenching experiments.....                                                                 | S30 |
| b) Detection of reductive products.....                                                               | S30 |
| c) Stern-Volmer fluorescence quenching experiments.....                                               | S32 |
| 10. <sup>1</sup> H, <sup>13</sup> C and <sup>19</sup> F NMR Spectra of synthesized compounds .....    | S35 |

## General procedure

All non-aqueous reactions were carried out under an atmosphere of nitrogen in flame-dried glassware and were stirred using a magnetic stir plate. All reactions were carried out using commercial-grade solvent unless otherwise noted. CH<sub>3</sub>CN, DCE, and CH<sub>2</sub>Cl<sub>2</sub> were dried over calcium hydride. Dry THF was prepared by distilling over sodium ketyl.

All reactions were monitored by thin layer chromatography (TLC) on WhatmanPartisil® K6F TLC plates (silica gel 60 Å, 0.25 mm thickness) and visualized using a UV lamp (366 or 254 nm) or by use of one of the following visualization reagents: PMA: 10g phosphomolybdic acid/ 100 mL ethanol; KMnO<sub>4</sub>: 0.75g potassium permanganate, 5g K<sub>2</sub>CO<sub>3</sub>, / 100 mL water. Products were isolated by column chromatography (Merck silica gel 100-200µm). Yields refer to chromatographically and spectroscopically homogenous materials unless noted otherwise. <sup>1</sup>H, <sup>13</sup>C and <sup>19</sup>F NMR spectra were recorded on Bruker 400 or Bruker 500 MHz spectrometers. Chemical shift values (δ) are reported in ppm and calibrated to the residual solvent peak CDCl<sub>3</sub> δ = 7.2600 ppm for <sup>1</sup>H, δ = 77.16 for <sup>13</sup>C, DMSO-d<sub>6</sub> δ = 2.500 ppm for <sup>1</sup>H, δ = 39.500 ppm for <sup>13</sup>C; or calibrated to tetramethylsilane (δ = 0.00 ppm). All NMR spectra were recorded at ambient temperature (290 K) unless otherwise noted. <sup>1</sup>H NMR spectra are reported as follows: chemical shift (multiplicity, coupling constant, integration). The following abbreviations are used to indicate multiplicities: s, singlet; d, doublet; t, triplet; q, quartet; quint, quintet; sext, sextet; sept, septet; m, multiplet; dd, doublet of doublet; dt, doublet of triplet; dq, doublet of quartet; td, triplet of doublet; tt, triplet of triplet; dq, doublet of quartet; br, broad; app, apparent.

Mass spectra were recorded by electrospray ionization (ESI) method on a Q-TOF Micro with lock spray source.

The crystal data were collected and integrated using a BrukerAxs kappa apex2 CCD diffractometer, with graphite monochromated Mo-Kα radiation.

Quinoxalin-2(1H)-ones **1** were synthesized following literature procedures (*Org. Lett.* **2013**, *15*, 5606–5609). Compound **1c** and **1d** were prepared following the reported procedure (*Bioorg. Med. Chem.* **2023**, *78*, 117152). Compound **1x** and **1y** were prepared as reported earlier (*Adv. Synth. Catal.* **2023**, *365*, 1020–1026.). Compounds **2** (styrene derivatives) were prepared following the reported procedure (*Eur. J. Med. Chem.* **2017**, *138*, 1089–1105). Styrene, 4-methylstyrene, DIPEA, cobalt bromide, and DPPP were purchased from Avra chemicals, TCI chemicals, and BLD chemicals.

### Plausible reaction mechanism for product 3

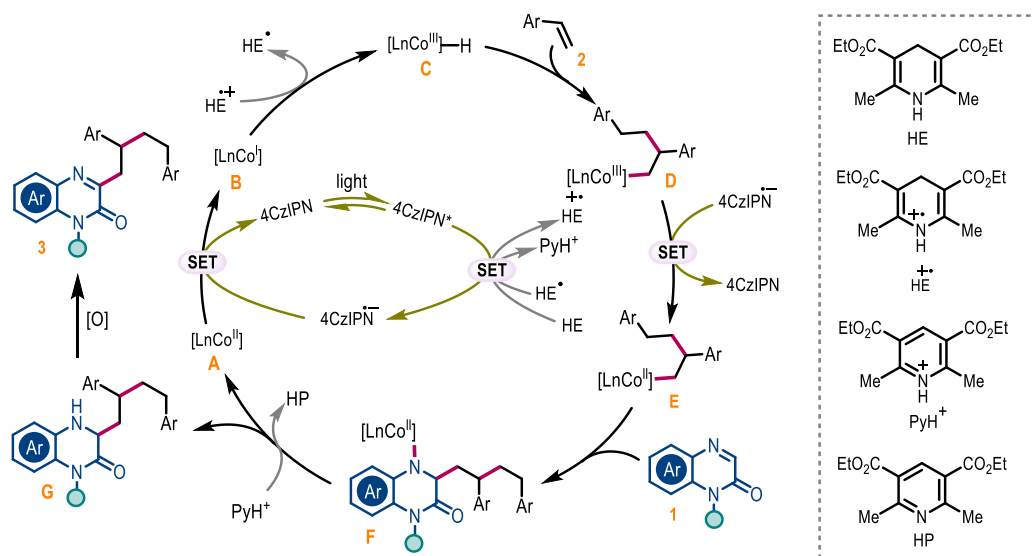

A plausible reaction mechanism is depicted here. Upon irradiation with visible light, photoexcited 4CzIPN\* accepts an electron from HE to form 4CzIPN<sup>•-</sup>. This species then reduces ligand-coordinated Co(II)-complex **A** to the low valent Co(I) species **B**. Next, Co(I) species transforms to Co(III)-H species **C** through oxidative addition with proton. Subsequent reaction with styrene (**2**) generates the alkyl Co(III) species **D**. It is then reduced by 4CzIPN<sup>•-</sup> to render alkyl Co(II) species **E**, which reacts with quinoxalin-2-one (**1**) to give intermediate **F**. Subsequent protonation yields reduced coupling product **G** and regenerates the active Co(II)-complex **A**. Further oxidation of **G** under photocatalysis furnishes the desired C3-functionalized products **3**.

At this juncture, another alternative mechanism (for example, the one shown below) cannot be also ruled out.

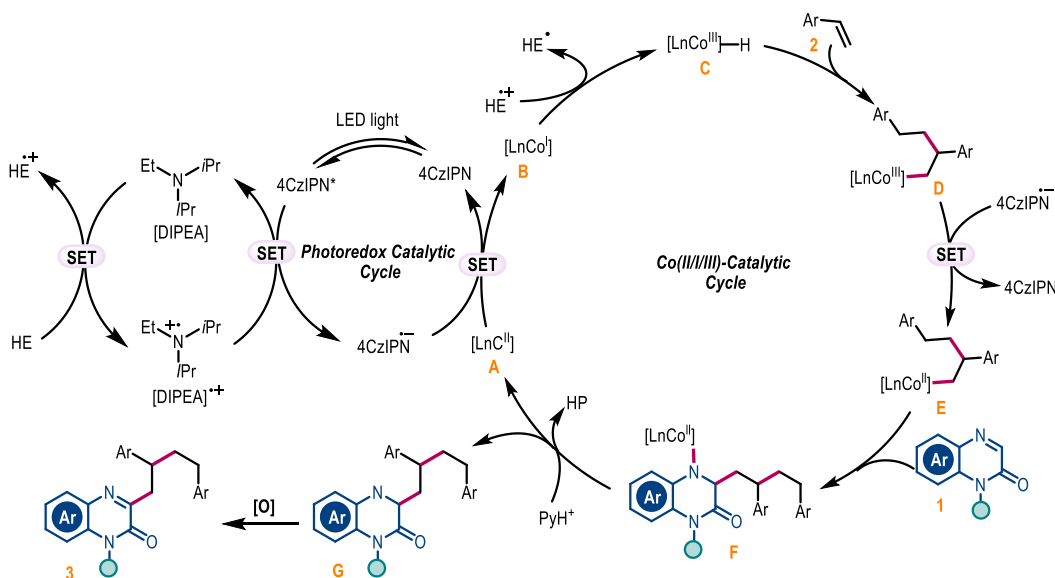

## General procedure for C3-selective coupling of quinoxalin-2(1*H*)-one (**1**) with alkene (**2**)

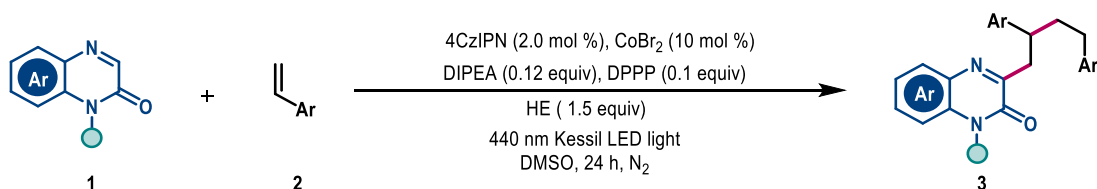

A 16×100 mm oven-dried reaction tube equipped with a magnetic stir was charged with CoBr<sub>2</sub> (10 mol %), DPPP (0.1 equiv), 4CzIPN (2.0 mol %), Hantzsch ester (HE) (1.5 equiv), quinoxalinone **1** (0.2 mmol, 1.0 equiv), and alkene **2** (0.6 mmol, 3.0 equiv) under the nitrogen atmosphere. The reaction tube was capped with a septum, and DIPEA (0.12 equiv) and dry DMSO (1.5 mL) were added via a syringe. Then, the reaction mixture was allowed to stir with irradiation of 440 nm Kessil LED light at room temperature for 24 h. After completion of the reaction (TLC monitored), brine solution was added and then extracted with ethyl acetate. The combined organic layers were dried with anhydrous Na<sub>2</sub>SO<sub>4</sub>, filtered, and concentrated under reduced pressure. The resulting residue was purified by column chromatography over silica gel to get C3-alkyl quinoxalin-2(1*H*)-one (**3**).

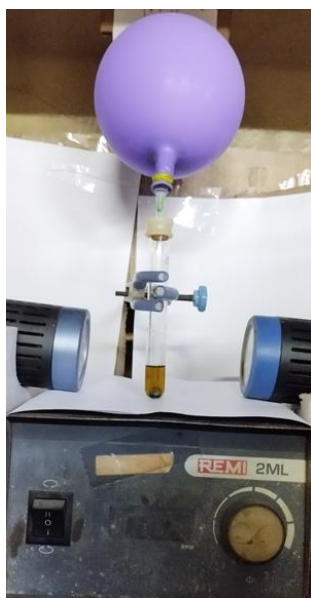

Before the reaction

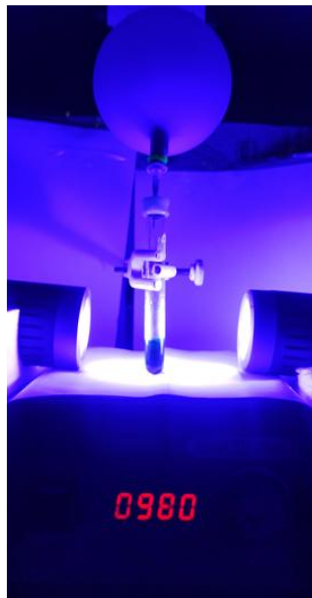

During the reaction

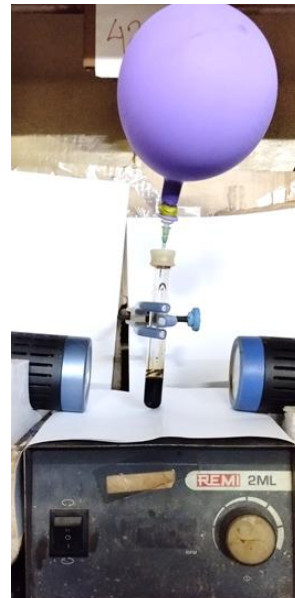

After the reaction

## General procedure for C3-selective coupling of quinoxalin-2(1*H*)-one (**1**) with alkyne

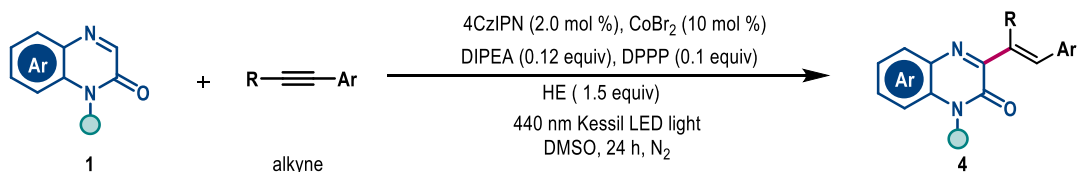

A 16×100 mm oven-dried reaction tube equipped with a magnetic stir was charged with CoBr<sub>2</sub> (10 mol %), DPPP (0.1 equiv), 4CzIPN (2.0 mol %), Hantzsch ester (HE) (1.5 equiv), quinoxalinone **1** (0.2 mmol, 1.0 equiv), and alkyne (0.6 mmol, 3.0 equiv) under the nitrogen atmosphere. The reaction tube was capped with a septum, and DIPEA (0.12 equiv) and dry DMSO (1.5 mL) were added via a syringe. Then, the reaction mixture was allowed to stir with irradiation of 440 nm Kessil LED light at room temperature for 24 h. After completion (TLC monitored), brine solution was added and then extracted with ethyl acetate. The combined organic layers were dried with anhydrous Na<sub>2</sub>SO<sub>4</sub>, filtered, and concentrated under reduced pressure. The resulting residue was purified by column chromatography over silica gel to get C3-alkenyl quinoxalin-2(1*H*)-one (**4**).

## Spectral Data of Synthesized Compounds

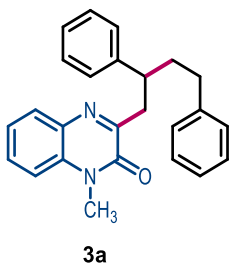

Compound, **3a**: Yellow solid; mp = 84–86 °C; eluent (20% ethyl acetate in hexane). **Yield**: 93% (68 mg); **<sup>1</sup>H NMR (400 MHz, CDCl<sub>3</sub>)** δ 7.79 – 7.76 (m, 1H), 7.52 – 7.46 (m, 1H), 7.33 – 7.28 (m, 5H), 7.24 – 7.17 (m, 3H), 7.16 – 7.12 (m, 2H), 7.10 – 7.07 (m, 2H), 3.65 (s, 3H, CH<sub>3</sub>), 3.54 – 3.50 (m, 1H, CH), 3.31 – 3.27 (m, 2H, CH<sub>2</sub>), 2.53 – 2.48 (m, 2H, CH<sub>2</sub>), 2.15 – 1.98 (m, 2H, CH<sub>2</sub>). **<sup>13</sup>C NMR (101 MHz, CDCl<sub>3</sub>)** δ 159.5(C), 155.1(C), 144.9(C), 142.6(C), 133.1(C), 132.8(C), 129.9(CH), 129.7(CH), 128.51(CH), 128.45(CH), 128.3(CH), 128.1(CH), 126.3(CH), 125.7(CH), 123.6(CH), 113.6(CH), 42.8(CH), 41.1(CH<sub>3</sub>), 37.9(CH<sub>3</sub>), 33.9(CH<sub>3</sub>), 29.2(CH<sub>3</sub>). **HRMS (ESI/TOF-Q) m/z: [M+H]<sup>+</sup>** Calculated for C<sub>25</sub>H<sub>24</sub>N<sub>2</sub>OH<sup>+</sup> 369.1961; Found 369.1964.

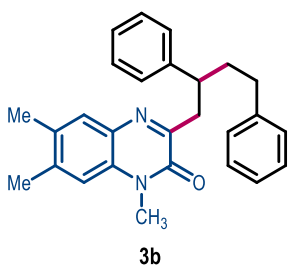

Compound, **3b**: Yellow liquid; eluent (15% ethyl acetate in hexane). **Yield**: 95% (75 mg); **<sup>1</sup>H NMR (400 MHz, CDCl<sub>3</sub>)** δ 7.52 (s, 1H), 7.33 – 7.25 (m, 5H), 7.23 – 7.16 (m, 2H), 7.15 – 7.12 (m, 1H), 7.09 – 7.06 (m, 2H), 7.00 (s, 1H), 3.61 (s, 3H), 3.53 – 3.45 (m, 1H), 3.28 – 3.24 (m, 2H), 2.51 – 2.46 (m, 2H), 2.38 (s, 3H), 2.33 (s, 3H), 2.12 – 1.96 (m, 2H). **<sup>13</sup>C NMR (101 MHz, CDCl<sub>3</sub>)** δ 158.1(C), 155.1(C), 145.0(C), 142.6(C), 139.4(C), 132.4(C), 131.2(C), 131.1(C), 129.9(CH), 128.5(CH), 128.4(CH), 128.3(CH), 128.1(CH), 126.2(CH), 125.7(CH), 114.2(CH), 42.9(CH), 41.1(CH<sub>2</sub>), 37.9(CH<sub>2</sub>), 33.9(CH<sub>2</sub>), 29.0(CH<sub>3</sub>), 20.5(CH<sub>3</sub>), 19.2(CH<sub>3</sub>). **HRMS**

(ESI/TOF-Q)  $m/z$ :  $[M+H]^+$  Calculated for  $C_{27}H_{28}N_2OH^+$  397.2274; Found 397.2285.

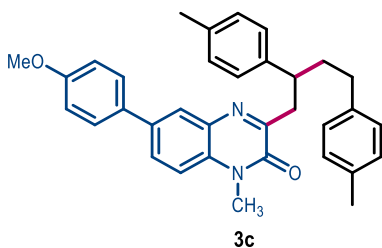

Compound, **3c**: Yellow liquid; eluent (15% ethyl acetate in hexane). **Yield**: 89% (89 mg);  **$^1H$  NMR (500 MHz,  $CDCl_3$ )**  $\delta$  7.97 (d,  $J = 2.2$  Hz, 1H), 7.70 (dd,  $J = 8.7, 2.2$  Hz, 1H), 7.60 – 7.59 (m, 2H), 7.29 (d,  $J = 8.6$  Hz, 1H), 7.22 (d,  $J = 8.1$  Hz, 2H), 7.09 (d,  $J = 7.8$  Hz, 2H), 7.03 – 6.98 (m, 6H), 3.88 (s, 3H), 3.67 (s, 3H), 3.53 – 3.48 (m, 1H), 3.33 – 3.23 (m, 2H), 2.48 – 2.42 (m, 2H), 2.30 (s, 3H), 2.28 (s, 3H), 2.09 – 1.96 (m, 2H).  **$^{13}C$  NMR (126 MHz,  $CDCl_3$ )**  $\delta$  160.0, 159.6, 155.0, 141.8, 139.6, 136.4, 135.7, 135.1, 133.1, 132.2, 131.9, 129.2, 129.0, 128.4, 128.1, 128.0, 127.3, 114.6(2C), 114.0, 55.5, 42.4, 41.4, 38.1, 33.5, 29.2, 21.2, 21.1. **HRMS (ESI/TOF-Q)**  $m/z$ :  $[M+H]^+$  Calculated for  $C_{34}H_{34}N_2O_2H^+$  503.2693; Found 503.2694.

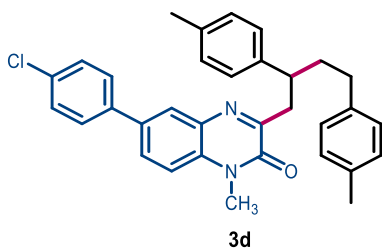

Compound, **3d**: Yellow liquid; eluent (15% ethyl acetate in hexane). **Yield**: 86% (87 mg);  **$^1H$  NMR (400 MHz,  $CDCl_3$ )**  $\delta$  7.98 (d,  $J = 2.2$  Hz, 1H), 7.69 (dd,  $J = 8.6, 2.2$  Hz, 1H), 7.59 – 7.57 (m, 2H), 7.46 – 7.44 (m, 2H), 7.31 – 7.28 (m, 1H), 7.2 (dd,  $J = 7.9, 1.7$  Hz, 2H), 7.11 (d,  $J = 7.7$  Hz, 2H), 7.05 – 6.99 (m, 4H), 3.66 (s, 3H), 3.55 – 3.47 (m, 1H), 3.35 – 3.23 (m, 2H), 2.54 – 2.41 (m, 2H), 2.31 – 2.29 (m, 6H), 2.10 – 1.96 (m, 2H).  **$^{13}C$  NMR (101 MHz,  $CDCl_3$ )**  $\delta$  160.3, 154.9, 141.7, 139.5, 138.1, 135.7, 135.4, 135.1, 133.8, 133.0, 132.5, 129.3, 129.2, 129.0, 128.4, 128.3, 127.9, 127.7, 127.1, 114.2, 42.3, 41.3, 38.1, 33.4, 29.2, 21.2, 21.1. **HRMS (ESI/TOF-Q)**  $m/z$ :  $[M+H]^+$  Calculated for  $C_{33}H_{31}ClN_2OH^+$  507.2198; Found 507.2206.

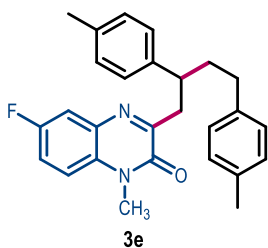

Compound, **3e**: Yellow liquid; eluent (15% ethyl acetate in hexane). **Yield**: 85% (70 mg);  **$^1H$  NMR (500 MHz,  $CDCl_3$ )**  $\delta$  7.46 (dd,  $J = 8.8, 2.8$  Hz, 1H), 7.24 – 7.17 (m, 4H), 7.11 – 7.09 (m, 2H), 7.05 – 6.98 (m, 4H), 3.63 (s, 3H), 3.50 – 3.45 (m, 1H), 3.31 – 3.23 (m, 2H), 2.51 – 2.42 (m, 2H), 2.31 – 2.30 (m, 6H), 2.08 – 1.96 (m, 2H).  **$^{13}C$  NMR (126 MHz,  $CDCl_3$ )**  $\delta$  161.2, 158.7 (d,  $J = 243.2$  Hz), 154.7, 141.7, 139.5, 135.7, 135.1, 133.3 (d,  $J = 11.2$  Hz), 129.8, 129.1, 129.0, 128.4, 127.9, 117.3 (d,  $J = 23.9$  Hz), 115.3 (d,  $J = 22.4$  Hz), 114.6 (d,  $J = 8.8$  Hz), 42.2, 41.2, 38.2, 33.4, 29.4, 21.2, 21.1.  **$^{19}F$  NMR (471 MHz,  $CDCl_3$ )**  $\delta$  -110.43. **HRMS (ESI/TOF-Q)**  $m/z$ :  $[M+H]^+$  Calculated for  $C_{27}H_{27}FN_2OH^+$  415.2180; Found 415.2175.

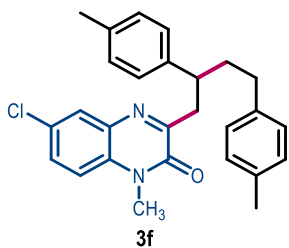

Compound, **3f**: Yellow liquid; eluent (15% ethyl acetate in hexane). **Yield**: 94% (81 mg); **<sup>1</sup>H NMR (400 MHz, CDCl<sub>3</sub>)** δ 7.75 (d, J = 2.4 Hz, 1H), 7.44 (dd, J = 8.9, 2.4 Hz, 1H), 7.21 – 7.19 (m, 2H), 7.16 (d, J = 8.9 Hz, 1H), 7.09 (d, J = 7.9 Hz, 2H), 7.05 – 6.97 (m, 4H), 3.61 (s, 3H), 3.51 – 3.43 (m, 1H), 3.29 – 3.22 (m, 2H), 2.51 – 2.39 (m, 2H), 2.30 (bs, 6H), 2.07 – 1.96 (m, 2H). **<sup>13</sup>C NMR (101 MHz, CDCl<sub>3</sub>)** δ 161.1, 155.0, 141.7, 139.5, 135.7, 135.1, 133.4, 131.9, 129.6, 129.3, 129.2, 129.0, 128.9, 128.4, 128.0, 114.7, 42.1, 41.1, 38.2, 33.4, 29.3, 21.15, 21.09. **HRMS (ESI/TOF-Q)** m/z: [M+H]<sup>+</sup> Calculated for C<sub>27</sub>H<sub>27</sub>ClN<sub>2</sub>O<sup>+</sup> 431.1885; Found 431.1880.

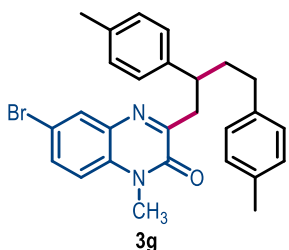

Compound, **3g**: Yellow liquid; eluent (15% ethyl acetate in hexane). **Yield**: 81% (77 mg); **<sup>1</sup>H NMR (400 MHz, CDCl<sub>3</sub>)** δ 7.81 – 7.78 (m, 1H), 7.52 – 7.48 (m, 1H), 7.34 – 7.30 (m, 1H), 7.24 – 7.20 (m, 2H), 7.10 (d, J = 7.8 Hz, 2H), 7.06 – 6.98 (m, 4H), 3.65 (s, 3H), 3.55 – 3.46 (m, 1H), 3.33 – 3.24 (m, 2H), 2.53 – 2.43 (m, 2H), 2.32 – 2.30 (m, 6H), 2.10 – 1.98 (m, 2H). **<sup>13</sup>C NMR (126 MHz, CDCl<sub>3</sub>)** δ 159.6, 155.1, 141.8, 139.6, 135.7, 135.1, 133.1, 132.8, 129.9, 129.7, 129.1, 129.0, 128.4, 128.0, 123.6, 113.6, 42.4, 41.3, 38.1, 33.5, 29.2, 21.2, 21.1. **HRMS (ESI/TOF-Q)** m/z: [M+H]<sup>+</sup> Calculated for C<sub>27</sub>H<sub>27</sub>BrN<sub>2</sub>O<sup>+</sup> 475.1380; Found 475.1383.

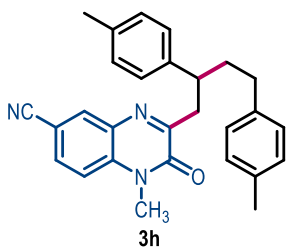

Compound, **3h**: Yellow liquid; eluent (15% ethyl acetate in hexane). **Yield**: 88% (74 mg); **<sup>1</sup>H NMR (400 MHz, CDCl<sub>3</sub>)** δ 8.04 (d, J = 2.0 Hz, 1H), 7.71 (dd, J = 8.7, 1.9 Hz, 1H), 7.30 (d, J = 8.8 Hz, 1H), 7.19 (d, J = 8.0 Hz, 2H), 7.20 – 6.98 (m, 6H), 3.63 (s, 3H), 3.49 – 3.42 (m, 1H), 3.32 – 3.23 (m, 2H), 2.50 – 2.39 (m, 2H), 2.30 (s, 6H), 2.04 – 1.97 (m, 2H). **<sup>13</sup>C NMR (101 MHz, CDCl<sub>3</sub>)** δ 161.9, 154.6, 141.4, 139.4, 136.3, 135.9, 135.2, 134.1, 132.31, 132.25, 129.2, 129.0, 128.4, 127.9, 118.2, 114.7, 107.1, 42.0, 41.0, 38.3, 33.4, 29.4, 21.15, 21.11. **HRMS (ESI/TOF-Q)** m/z: [M+H]<sup>+</sup> Calculated for C<sub>28</sub>H<sub>27</sub>N<sub>3</sub>O<sup>+</sup> 422.2227; Found 422.2223.

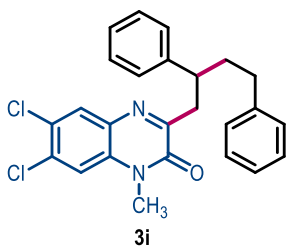

Compound, **3i**: Yellow liquid; eluent (15% ethyl acetate in hexane). **Yield**: 91% (82 mg); **<sup>1</sup>H NMR (500 MHz, CDCl<sub>3</sub>)** δ 7.82 (s, 1H), 7.33 (s, 1H), 7.29 – 7.28 (m, 4H), 7.23 (d, J = 7.3 Hz, 2H), 7.19 – 7.14 (m, 2H), 7.09 (dd, J = 7.5, 1.6 Hz, 2H), 3.59 (s, 3H), 3.49 – 3.43 (m, 1H), 3.29 – 3.23 (m, 2H), 2.51 – 2.47 (m, 2H), 2.07 – 2.00 (m, 2H). **<sup>13</sup>C NMR (101 MHz, CDCl<sub>3</sub>)** δ 161.2, 154.5, 144.6, 142.5, 133.8, 132.6, 131.9, 130.7, 128.5(2C), 128.4, 128.1, 127.4, 126.5, 125.8, 115.1, 42.7, 41.0, 38.1, 33.9, 29.4. **HRMS (ESI/TOF-Q)** m/z:



$[M+H]^+$  Calculated for  $C_{25}H_{22}Cl_2N_2OH^+$  437.1182; Found 437.1180.

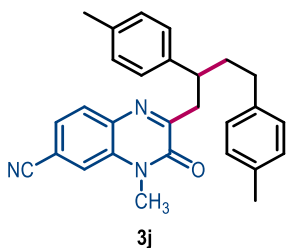

Compound, **3j**: Yellow solid; mp = 112–114 °C; eluent (15% ethyl acetate in hexane). **Yield**: 91% (77 mg);  **$^1H$  NMR (400 MHz,  $CDCl_3$ )**  $\delta$  7.83 (d,  $J$  = 8.1 Hz, 1H), 7.56 – 7.52 (m, 2H), 7.19 (d,  $J$  = 8.1 Hz, 2H), 7.09 (d,  $J$  = 8.4 Hz, 2H), 7.04 (d,  $J$  = 7.7 Hz, 2H), 6.98 (d,  $J$  = 8.2 Hz, 2H), 3.63 (s, 3H), 3.50 – 3.43 (m, 1H), 3.35 – 3.23 (m, 2H), 2.50 – 2.41 (m, 2H), 2.30 (s, 6H), 2.07 – 1.94 (m, 2H).  **$^{13}C$  NMR (101 MHz,  $CDCl_3$ )**  $\delta$  163.2, 154.3, 141.2, 139.2, 135.8, 135.1, 134.8, 133.4, 130.6, 129.1, 128.9, 128.3, 127.8, 126.4, 118.2, 117.7, 112.7, 42.1, 41.2, 38.1, 33.3, 29.2, 21.03, 20.99. **HRMS (ESI/TOF-Q) m/z**:  $[M+H]^+$  Calculated for  $C_{28}H_{27}N_3OH^+$  422.2227; Found 422.2229.

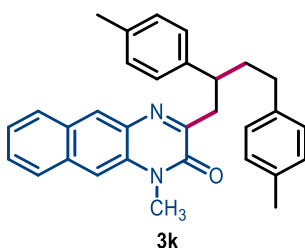

Compound, **3k**: Yellow liquid; eluent (15% ethyl acetate in hexane). **Yield**: 87% (78 mg);  **$^1H$  NMR (400 MHz,  $CDCl_3$ )**  $\delta$  8.27 (s, 1H), 7.96 (d,  $J$  = 8.2 Hz, 1H), 7.89 (d,  $J$  = 8.4 Hz, 1H), 7.57 – 7.53 (m, 2H), 7.49 – 7.45 (m, 1H), 7.22 (d,  $J$  = 8.1 Hz, 2H), 7.08 (d,  $J$  = 7.8 Hz, 2H), 7.03 – 6.97 (m, 4H), 3.71 (s, 3H), 3.55 – 3.48 (m, 1H), 3.32 – 3.28 (m, 2H), 2.53 – 2.43 (m, 2H), 2.29 – 2.28 (m, 6H), 2.13 – 1.98 (m, 2H).  **$^{13}C$  NMR (101 MHz,  $CDCl_3$ )**  $\delta$  160.2, 154.9, 141.8, 139.6, 135.7, 135.1, 133.5, 132.2, 131.9, 129.8, 129.2, 129.0, 128.8, 128.5, 128.4, 128.0, 127.7, 127.3, 125.3, 109.9, 42.5, 41.4, 38.2, 33.5, 29.2, 21.2, 21.1. **HRMS (ESI/TOF-Q) m/z**:  $[M+H]^+$  Calculated for  $C_{31}H_{30}N_2OH^+$  447.2431; Found 447.2433.

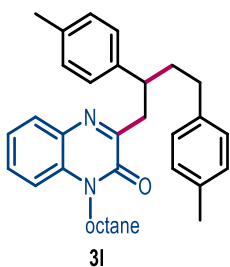

Compound, **3l**: Yellow liquid; eluent (10% ethyl acetate in hexane). **Yield**: 93% (92 mg);  **$^1H$  NMR (400 MHz,  $CDCl_3$ )**  $\delta$  7.80 (d,  $J$  = 7.9 Hz, 1H), 7.49 (t,  $J$  = 7.7 Hz, 1H), 7.30 (t,  $J$  = 7.6 Hz, 1H), 7.24 – 7.20 (m, 3H), 7.09 (d,  $J$  = 7.9 Hz, 2H), 7.04 – 6.98 (m, 4H), 4.18 (t,  $J$  = 7.8 Hz, 2H), 3.53 – 3.44 (m, 1H), 3.34 – 3.21 (m, 2H), 2.52 – 2.43 (m, 2H), 2.303 – 2.296 (m, 6H), 2.10 – 1.98 (m, 2H), 1.72 – 1.67 (m, 2H), 1.47 – 1.36 (m, 4H), 1.33 – 1.28 (m, 6H), 0.92 – 0.88 (m, 3H).  **$^{13}C$  NMR (101 MHz,  $CDCl_3$ )**  $\delta$  159.7, 154.7, 141.8, 139.6, 135.6, 135.0, 133.1, 132.3, 130.1, 129.5, 129.1, 129.0, 128.4, 128.0, 123.3, 113.6, 42.5, 42.4, 41.2, 38.1, 33.5, 31.9, 29.4, 29.3, 27.4, 27.1, 22.7, 21.15, 21.08, 14.2. **HRMS (ESI/TOF-Q) m/z**:  $[M+H]^+$  Calculated for  $C_{34}H_{42}N_2OH^+$  495.3370; Found 495.3376.

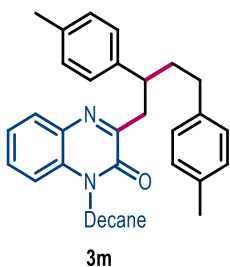

Compound, **3m**: Yellow liquid; eluent (10% ethyl acetate in hexane). **Yield**: 90% (94 mg); **<sup>1</sup>H NMR (400 MHz, CDCl<sub>3</sub>)** δ 7.80 (d, *J* = 7.9 Hz, 1H), 7.49 (t, *J* = 7.7 Hz, 1H), 7.30 (t, *J* = 7.6 Hz, 1H), 7.24 – 7.20 (m, 3H), 7.09 (d, *J* = 7.9 Hz, 1H), 7.05 – 6.98 (m, 4H), 4.18 (t, *J* = 7.8 Hz, 2H), 3.53 – 3.44 (m, 1H), 3.34 – 3.21 (m, 2H), 2.52 – 2.41 (m, 2H), 2.304 – 2.296 (m, 6H), 2.09 – 1.97 (m, 2H), 1.72 – 1.67 (m, 2H), 1.45 – 1.39 (m, 2H), 1.29 – 1.28 (m, 12H), 0.90 (t, *J* = 6.7 Hz, 3H). **<sup>13</sup>C NMR (101 MHz, CDCl<sub>3</sub>)** δ 159.7, 154.7, 141.8, 139.6, 135.6, 135.0, 133.1, 132.3, 130.1, 129.5, 129.1, 129.0, 128.4, 128.0, 123.3, 113.6, 42.5, 42.4, 41.3, 38.1, 33.5, 32.0, 29.6(2C), 29.44, 29.41, 27.4, 27.1, 22.8, 21.15, 21.08, 14.2. **HRMS (ESI/TOF-Q)** *m/z*: [M+H]<sup>+</sup> Calculated for C<sub>36</sub>H<sub>46</sub>N<sub>2</sub>OH<sup>+</sup> 523.3683; Found 523.3698.

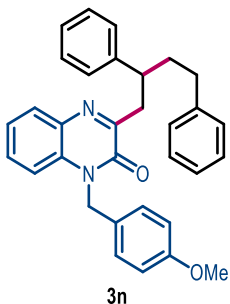

Compound, **3n**: Yellow liquid; eluent (15% ethyl acetate in hexane). **Yield**: 85% (81 mg); **<sup>1</sup>H NMR (400 MHz, CDCl<sub>3</sub>)** δ 7.77 (dd, *J* = 7.8, 1.6 Hz, 1H), 7.39 – 7.27 (m, 5H), 7.25 – 7.14 (m, 6H), 7.10 (d, *J* = 7.6 Hz, 2H), 7.06 (d, *J* = 8.7 Hz, 2H), 6.81 – 6.79 (m, 2H), 5.36 (s, 2H), 3.76 (s, 3H), 3.58 – 3.50 (m, 1H), 3.42 – 3.29 (m, 2H), 2.54 – 2.50 (m, 2H), 2.23 – 2.00 (m, 2H). **<sup>13</sup>C NMR (101 MHz, CDCl<sub>3</sub>)** δ 159.8, 159.2, 155.1, 144.6, 142.6, 133.1, 132.5, 129.9, 129.7, 128.53, 128.45, 128.4(2C), 128.2, 127.5, 126.3, 125.8, 123.6, 114.5, 114.4, 55.4, 45.4, 43.4, 41.1, 38.2, 34.0. **HRMS (ESI/TOF-Q)** *m/z*: [M+H]<sup>+</sup> Calculated for C<sub>32</sub>H<sub>30</sub>N<sub>2</sub>OH<sup>+</sup> 475.2380; Found 475.2381.

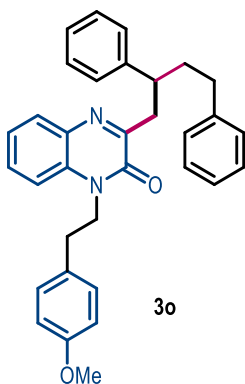

Compound, **3o**: Yellow liquid; eluent (15% ethyl acetate in hexane). **Yield**: 89% (87 mg); **<sup>1</sup>H NMR (500 MHz, CDCl<sub>3</sub>)** δ 7.81 (d, *J* = 8.0 Hz, 1H), 7.49 (t, *J* = 7.8 Hz, 1H), 7.34 – 7.28 (m, 6H), 7.25 – 7.15 (m, 6H), 7.11 (d, *J* = 6.9 Hz, 2H), 6.86 (d, *J* = 7.3 Hz, 2H), 4.36 (t, *J* = 7.6 Hz, 2H), 3.80 (s, 3H), 3.56 – 3.50 (m, 1H), 3.37 – 3.27 (m, 2H), 2.93 – 2.90 (m, 2H), 2.57 – 2.51 (m, 2H), 2.16 – 2.03 (m, 2H). **<sup>13</sup>C NMR (126 MHz, CDCl<sub>3</sub>)** δ 159.5, 158.7, 154.6, 144.7, 142.6, 133.0, 132.2, 130.1, 129.9, 129.7, 128.5, 128.4, 128.3, 128.1, 126.3, 125.7, 123.4, 114.3 (2C), 113.4, 55.4, 44.0, 42.9, 41.0, 38.0, 33.9, 32.6. **HRMS (ESI/TOF-Q)** *m/z*: [M+H]<sup>+</sup> Calculated for C<sub>33</sub>H<sub>32</sub>N<sub>2</sub>O<sub>2</sub>H<sup>+</sup> 489.2537; Found 489.2535.

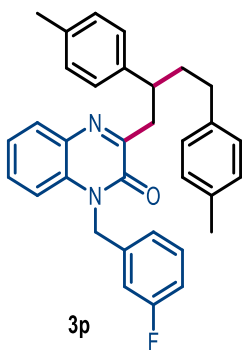

Compound, **3p**: Yellow liquid; eluent (15% ethyl acetate in hexane). **Yield**: 88% (86 mg); **<sup>1</sup>H NMR (400 MHz, CDCl<sub>3</sub>)** δ 7.80 (dd, *J* = 7.9, 1.6 Hz, 1H), 7.39 – 7.35 (m, 1H), 7.30 – 7.28 (m, 1H), 7.25 – 7.23 (m, 1H), 7.21 (d, *J* = 8.1 Hz, 2H), 7.12 – 7.08 (m, 3H), 7.06 – 7.00 (m, 4H), 6.97 – 6.93 (m, 1H), 6.92 – 6.90 (m, 1H), 6.83 – 6.80 (m, 1H), 5.41 (s, 2H), 3.56 – 3.49 (m, 1H), 3.41 – 3.27 (m, 2H), 2.52 – 2.48 (m, 2H), 2.302 – 2.297 (m, 6H), 2.12 – 2.03 (m, 2H). **<sup>13</sup>C NMR (101 MHz, CDCl<sub>3</sub>)** δ 163.2 (d, *J* = 246.8 Hz), 159.8, 154.9, 141.4, 139.4, 137.9 (d, *J* = 7.1 Hz), 135.6, 134.9, 133.0, 132.2, 130.5 (d, *J* = 8.4 Hz), 129.9, 129.6, 129.0, 128.9, 128.3, 127.9, 123.6, 122.3 (d, *J* = 3.2 Hz), 114.6 (d, *J* = 21.2 Hz), 114.0, 113.8 (d, *J* = 22.4 Hz), 45.3, 42.8, 41.0, 38.3, 33.4, 21.0, 20.9. **<sup>19</sup>F NMR (471 MHz, CDCl<sub>3</sub>)** δ -110.26. **HRMS (ESI/TOF-Q)** *m/z*: [M+H]<sup>+</sup> Calculated for C<sub>33</sub>H<sub>31</sub>FN<sub>2</sub>OH<sup>+</sup> 491.2493; Found 491.2491.

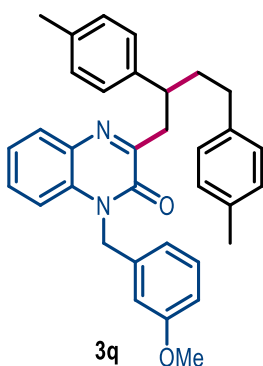

Compound, **3q**: Yellow liquid; eluent (15% ethyl acetate in hexane). **Yield**: 83% (83 mg); **<sup>1</sup>H NMR (400 MHz, CDCl<sub>3</sub>)** δ 7.78 (dd, *J* = 7.9, 1.6 Hz, 1H), 7.38 – 7.33 (m, 1H), 7.25 – 7.15 (m, 5H), 7.08 (d, *J* = 7.7 Hz, 2H), 7.04 – 6.98 (m, 4H), 6.79 – 6.77 (m, 1H), 6.72 – 6.71 (m, 1H), 6.69 – 6.66 (m, 1H), 5.41 (s, 2H), 3.74 (s, 3H), 3.56 – 3.48 (m, 1H), 3.37 – 3.27 (m, 2H), 2.50 – 2.45 (m, 2H), 2.29 (bs, 6H), 2.10 – 1.99 (m, 2H). **<sup>13</sup>C NMR (101 MHz, CDCl<sub>3</sub>)** δ 160.2, 159.9, 155.1, 141.7, 139.6, 137.1, 135.7, 135.1, 133.1, 132.5, 130.1, 130.0, 129.7, 129.2, 129.0, 128.4, 128.0, 123.6, 119.1, 114.5, 113.0, 112.81, 55.3, 45.9, 42.8, 41.3, 38.4, 33.5, 21.2, 21.1. **HRMS (ESI/TOF-Q)** *m/z*: [M+H]<sup>+</sup> Calculated for C<sub>34</sub>H<sub>34</sub>N<sub>2</sub>O<sub>2</sub>H<sup>+</sup> 503.2693; Found 503.2697.

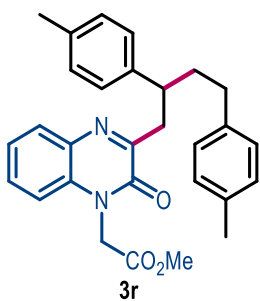

Compound, **3r**: Yellow solid; mp = 84–86 °C; eluent (15% ethyl acetate in hexane). **Yield**: 92% (84 mg); **<sup>1</sup>H NMR (500 MHz, CDCl<sub>3</sub>)** δ 7.80 (d, *J* = 7.9 Hz, 1H), 7.46 (t, *J* = 7.8 Hz, 1H), 7.32 (t, *J* = 7.6 Hz, 1H), 7.20 (d, *J* = 7.6 Hz, 2H), 7.09 (d, *J* = 7.7 Hz, 2H), 7.04 – 7.01 (m, 3H), 6.98 (d, *J* = 7.6 Hz, 2H), 5.04 – 4.93 (m, 2H), 3.75 (s, 3H), 3.50 – 3.44 (m, 1H), 3.26 (d, *J* = 7.4 Hz, 2H), 2.49 – 2.40 (m, 2H), 2.30 – 2.29 (m, 6H), 2.08 – 1.95 (m, 2H). **<sup>13</sup>C NMR (126 MHz, CDCl<sub>3</sub>)** δ 167.8, 159.5, 154.6, 141.7, 139.5, 135.7, 135.1, 132.9, 132.2, 130.2, 129.9, 129.2, 129.0, 128.4, 127.9, 124.0, 113.0, 52.9, 43.5, 42.4, 41.3, 38.0, 33.4, 21.2, 21.1. **HRMS (ESI/TOF-Q)** *m/z*: [M+H]<sup>+</sup> Calculated for C<sub>29</sub>H<sub>30</sub>N<sub>2</sub>O<sub>3</sub>H<sup>+</sup> 455.2329; Found 455.2334.

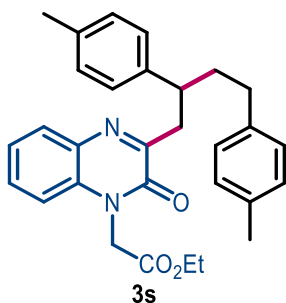

Compound, **3s**: Yellow solid; mp = 88–90 °C; eluent (15% ethyl acetate in hexane). **Yield**: 93% (87 mg); **<sup>1</sup>H NMR (500 MHz, CDCl<sub>3</sub>)** δ 7.79 (d, J = 7.9 Hz, 1H), 7.46 (t, J = 8.0 Hz, 1H), 7.31 (t, J = 7.7 Hz, 1H), 7.20 (d, J = 7.8 Hz, 2H), 7.08 (d, J = 7.8 Hz, 2H), 7.04 – 7.01 (m, 3H), 6.98 (d, J = 7.8 Hz, 2H), 5.02 – 4.91 (m, 2H), 4.22 (q, J = 7.1 Hz, 2H), 3.50 – 3.44 (m, 1H), 3.26 (d, J = 7.2 Hz, 2H), 2.50 – 2.40 (m, 2H), 2.30 – 2.29 (m, 6H), 2.08 – 1.97 (m, 2H), 1.25 (t, J = 7.2 Hz, 3H). **<sup>13</sup>C NMR (126 MHz, CDCl<sub>3</sub>)** δ 167.3, 159.5, 154.6, 141.7, 139.6, 135.7, 135.1, 132.9, 132.3, 130.2, 129.9, 129.2, 129.0, 128.4, 127.9, 123.9, 113.1, 62.1, 43.7, 42.4, 41.3, 38.0, 33.5, 21.2, 21.1, 14.2. **HRMS (ESI/TOF-Q)** m/z: [M+H]<sup>+</sup> Calculated for C<sub>30</sub>H<sub>32</sub>N<sub>2</sub>O<sub>3</sub>H<sup>+</sup> 469.2486; Found 469.2484.

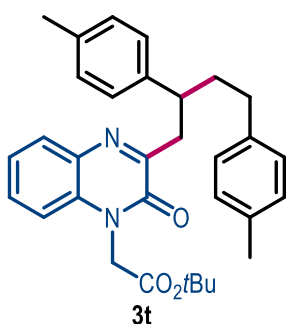

Compound, **3t**: Yellow solid; mp = 80–82 °C; eluent (15% ethyl acetate in hexane). **Yield**: 95% (94 mg); **<sup>1</sup>H NMR (400 MHz, CDCl<sub>3</sub>)** δ 7.79 (dd, J = 7.9, 1.5 Hz, 1H), 7.48 – 7.43 (m, 1H), 7.30 (td, J = 7.6, 1.2 Hz, 1H), 7.21 – 7.19 (m, 2H), 7.08 (d, J = 7.8 Hz, 2H), 7.04 – 6.97 (m, 5H), 4.94 – 4.81 (m, 2H), 3.52 – 3.44 (m, 1H), 3.27 (d, J = 7.3 Hz, 2H), 2.53 – 2.40 (m, 2H), 2.30 – 2.29 (m, 6H), 2.14 – 1.95 (m, 2H), 1.43 (s, 9H). **<sup>13</sup>C NMR (101 MHz, CDCl<sub>3</sub>)** δ 166.3, 159.6, 154.7, 141.8, 139.6, 135.6, 135.0, 132.9, 132.5, 130.2, 129.7, 129.2, 129.0, 128.4, 128.0, 123.7, 113.1, 83.1, 44.4, 42.5, 41.2, 38.1, 33.5, 28.1, 21.12, 21.07. **HRMS (ESI/TOF-Q)** m/z: [M+H]<sup>+</sup> Calculated for C<sub>32</sub>H<sub>36</sub>N<sub>2</sub>O<sub>3</sub>H<sup>+</sup> 497.2799; Found 497.2796.

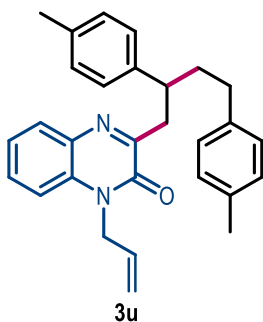

Compound, **3u**: Yellow solid; mp = 85–87 °C; eluent (15% ethyl acetate in hexane). **Yield**: 90% (76 mg); **<sup>1</sup>H NMR (400 MHz, CDCl<sub>3</sub>)** δ 7.80 (dd, J = 8.0, 1.6 Hz, 1H, CH), 7.48 – 7.44 (m, 1H, CH), 7.33 – 7.28 (m, 1H, CH), 7.23 – 7.20 (m, 3H, CH), 7.09 (d, J = 7.9 Hz, 2H, CH), 7.05 – 6.99 (m, 4H, CH), 5.96 – 5.84 (m, 1H, CH), 5.27 – 5.18 (m, 1H, CH), 5.07 – 5.02 (m, 1H, CH), 4.86 – 4.83 (m, 2H, CH<sub>2</sub>), 3.54 – 3.48 (m, 1H, CH), 3.36 – 3.23 (m, 2H, CH<sub>2</sub>), 2.53 – 2.43 (m, 2H, CH<sub>2</sub>), 2.30 (bs, 6H, CH<sub>3</sub>), 2.10 – 1.99 (m, 2H, CH<sub>2</sub>). **<sup>13</sup>C NMR (126 MHz, CDCl<sub>3</sub>)** δ 159.8(C), 154.6(C), 141.6(C), 139.6(C), 135.6(C), 135.1(C), 133.0(C), 132.3(C), 130.7(CH), 129.9(CH), 129.6(CH), 129.1(CH), 129.0(CH), 128.4(CH), 128.0(CH), 123.5(CH), 117.9(CH<sub>2</sub>), 114.2(CH), 44.5(CH<sub>2</sub>), 42.6(CH), 41.2(CH<sub>2</sub>), 38.1(CH<sub>2</sub>), 33.4(CH<sub>2</sub>), 21.2(CH<sub>3</sub>), 21.1(CH<sub>3</sub>). **HRMS (ESI/TOF-Q)** m/z: [M+H]<sup>+</sup> Calculated for C<sub>29</sub>H<sub>30</sub>N<sub>2</sub>O<sub>3</sub>H<sup>+</sup> 423.2431; Found 423.2433.

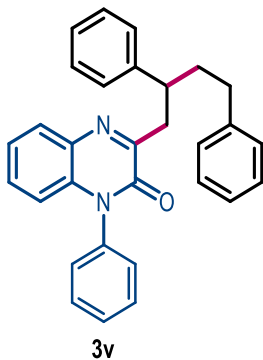

Compound, **3v**: Yellow liquid; eluent (15% ethyl acetate in hexane). **Yield:** 92% (79 mg); **<sup>1</sup>H NMR (500 MHz, CDCl<sub>3</sub>)** δ 7.83 – 7.79(m, 1H), 7.61 – 7.56 (m, 2H), 7.55 – 7.53 (m, 1H), 7.34 – 7.31 (m, 2H), 7.30 – 7.27 (m, 5H), 7.24 – 7.21 (m, 3H), 7.19 – 7.15 (m, 2H), 7.11 – 7.10 (m, 2H), 6.63 – 6.59 (m, 1H), 3.59 – 3.54 (m, 1H), 3.36 – 3.28 (m, 2H), 2.55 – 2.48 (m, 2H), 2.19 – 2.03 (m, 2H). **<sup>13</sup>C NMR (126 MHz, CDCl<sub>3</sub>)** δ 160.2, 154.6, 144.6, 142.5, 135.9, 133.8, 132.5, 130.3, 129.4, 129.33, 129.27, 128.4, 128.34, 128.26, 128.2, 128.0, 126.2, 125.6, 123.7, 115.3, 42.8, 41.1, 37.8, 33.8. **HRMS (ESI/TOF-Q) m/z:** [M+H]<sup>+</sup> Calculated for C<sub>30</sub>H<sub>26</sub>N<sub>2</sub>OH<sup>+</sup> 431.2118; Found 431.2135.

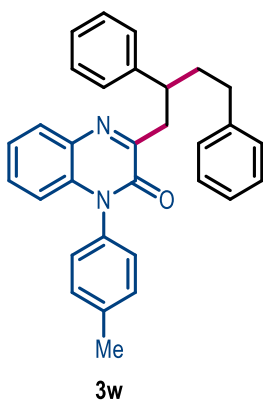

Compound, **3w**: Yellow liquid; eluent (15% ethyl acetate in hexane). **Yield:** 93% (83 mg); **<sup>1</sup>H NMR (500 MHz, CDCl<sub>3</sub>)** δ 7.77 – 7.75 (m, 1H), 7.36 – 7.34 (m, 2H), 7.29 (d, *J* = 7.8 Hz, 2H), 7.24 – 7.20 (m, 5H), 7.19 – 7.17 (m, 2H), 7.15 – 7.10 (m, 2H), 7.07 (d, *J* = 8.1 Hz, 2H), 7.02 – 7.00 (m, 1H), 6.62 – 6.59 (m, 1H), 3.55 – 3.49 (m, 1H), 3.33 – 3.23 (m, 2H), 2.50 – 2.46 (m, 2H), 2.42 (s, 3H), 2.13 – 2.01 (m, 2H). **<sup>13</sup>C NMR (126 MHz, CDCl<sub>3</sub>)** δ 160.3, 154.9, 144.7, 142.6, 139.5, 134.1, 133.3, 132.6, 131.0, 129.4, 129.3, 128.5, 128.4, 128.3, 128.2, 128.0, 126.3, 125.7, 123.7, 115.5, 42.9, 41.2, 37.9, 33.9, 21.4. **HRMS (ESI/TOF-Q) m/z:** [M+H]<sup>+</sup> Calculated for C<sub>31</sub>H<sub>28</sub>N<sub>2</sub>OH<sup>+</sup> 445.2274; Found 445.2290.

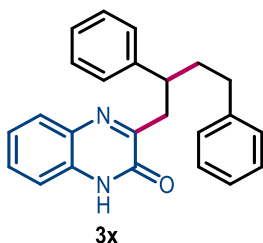

Compound, **3x**: Yellow liquid; eluent (25% ethyl acetate in hexane). **Yield:** 98% (70 mg); **<sup>1</sup>H NMR (500 MHz, CDCl<sub>3</sub>)** δ 12.40 (bs, 1H), 7.81 (d, *J* = 8.0 Hz, 1H), 7.48 (t, *J* = 7.7 Hz, 1H), 7.37 – 7.34 (m, 3H), 7.32 – 7.29 (m, 3H), 7.24 – 7.20 (m, 2H), 7.19 – 7.17 (m, 1H), 7.15 – 7.11 (m, 3H), 3.59 – 3.53 (m, 1H), 3.40 – 3.30 (m, 2H), 2.60 – 2.51 (m, 2H), 2.20 – 2.07 (m, 2H). **<sup>13</sup>C NMR (126 MHz, CDCl<sub>3</sub>)** δ 159.9, 156.8, 144.7, 142.4, 132.9, 130.9, 129.8, 128.9, 128.5(2C), 128.3, 128.1, 126.4, 125.7, 124.2, 115.8, 42.9, 40.3, 37.8, 33.8. **HRMS (ESI/TOF-Q) m/z:** [M+H]<sup>+</sup> Calculated for C<sub>24</sub>H<sub>22</sub>N<sub>2</sub>OH<sup>+</sup> 355.1805; Found 355.1801.

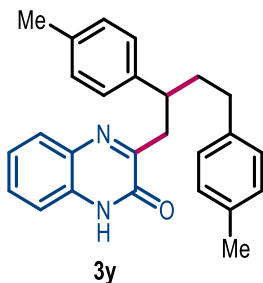

Compound, **3y**: Yellow solid; mp = 122–124 °C; eluent (20% ethyl acetate in hexane). **Yield:** 96% (73 mg); **<sup>1</sup>H NMR (400 MHz, CDCl<sub>3</sub>)** δ 12.33 (bs, 1H), 7.81 (dd, *J* = 8.0, 1.4 Hz, 1H), 7.50 – 7.46 (m, 1H), 7.36 – 7.29 (m, 2H), 7.23 (d, *J* = 8.1 Hz, 2H), 7.10 (d, *J* = 7.8 Hz, 2H), 7.04 – 6.99 (m, 4H), 3.54 – 3.47 (m, 1H), 3.37 – 3.24 (m, 2H), 2.55 – 2.42 (m, 2H), 2.28 – 2.27 (s, 6H), 2.15 – 2.00 (m, 2H). **<sup>13</sup>C NMR (101 MHz, CDCl<sub>3</sub>)** δ 160.1, 156.8, 141.7, 139.5, 135.7, 135.1, 132.9, 130.9, 129.8,

129.2, 129.0, 128.9, 128.4, 127.9, 124.2, 115.8, 42.6, 40.5, 38.0, 33.4, 21.13, 21.07. **HRMS** (ESI/TOF-Q) m/z: [M+H]<sup>+</sup> Calculated for C<sub>26</sub>H<sub>26</sub>N<sub>2</sub>OH<sup>+</sup> 383.2118; Found 383.2112.

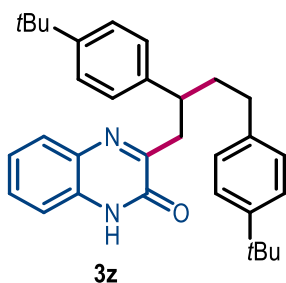

Compound, **3z**: Yellow liquid; eluent (20% ethyl acetate in hexane). **Yield**: 95% (89 mg); **<sup>1</sup>H NMR (400 MHz, CDCl<sub>3</sub>)** δ 11.57 (bs, 1H), 7.78 (dd, J = 8.1, 1.4 Hz, 1H), 7.49 – 7.44 (m, 1H), 7.33 – 7.29 (m, 2H), 7.28 – 7.27 (m, 2H), 7.25 – 7.22 (m, 4H), 7.05 – 7.03 (m, 2H), 3.54 – 3.47 (m, 1H), 3.30 (d, J = 7.3 Hz, 2H), 2.55 – 2.44 (m, 2H), 2.15 – 2.00 (m, 2H), 1.28 – 1.27 (m, 18H). **<sup>13</sup>C NMR (101 MHz, CDCl<sub>3</sub>)** δ 160.3, 156.8, 149.0, 148.5, 141.7, 139.6, 133.0, 130.9, 129.8, 128.9, 128.1, 127.6, 125.3, 125.2, 124.2, 115.7, 42.6, 40.4, 37.6, 34.5, 34.4, 33.3, 31.54, 31.51. **HRMS** (ESI/TOF-Q) m/z: [M+H]<sup>+</sup> Calculated for C<sub>32</sub>H<sub>38</sub>N<sub>2</sub>OH<sup>+</sup> 467.3057; Found 467.3057.

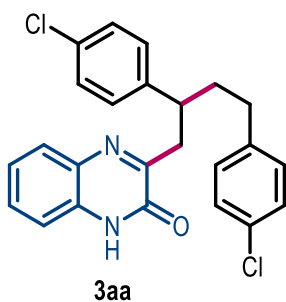

Compound, **3aa**: Yellow solid; mp = 156–158 °C; eluent (20% ethyl acetate in hexane). **Yield**: 91% (77 mg); **<sup>1</sup>H NMR (400 MHz, CDCl<sub>3</sub>)** δ 12.23 (bs, 1H), 7.80 (dd, J = 8.1, 1.4 Hz, 1H), 7.53 – 7.49 (m, 1H), 7.38 – 7.34 (m, 1H), 7.31 – 7.28 (m, 2H), 7.26 (bs, 3H), 7.20 (d, J = 8.4 Hz, 2H), 7.03 (d, J = 8.5 Hz, 2H), 3.54 – 3.47 (m, 1H), 3.33 – 3.26 (m, 2H), 2.54 – 2.44 (m, 2H), 2.18 – 1.97 (m, 2H). **<sup>13</sup>C NMR (101 MHz, CDCl<sub>3</sub>)** δ 159.4, 156.6, 142.9, 140.5, 132.9, 132.1, 131.6, 130.8, 130.0, 129.8, 129.4, 128.9, 128.7, 128.5, 124.4, 115.7, 42.1, 40.0, 37.6, 33.0. **HRMS** (ESI/TOF-Q) m/z: [M+H]<sup>+</sup> Calculated for C<sub>24</sub>H<sub>20</sub>Cl<sub>2</sub>N<sub>2</sub>OH<sup>+</sup> 423.1025; Found 423.1022.

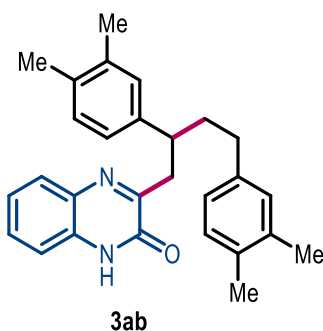

Compound, **3ab**: Yellow liquid; eluent (20% ethyl acetate in hexane). **Yield**: 93% (76 mg); **<sup>1</sup>H NMR (400 MHz, CDCl<sub>3</sub>)** δ 10.69 (s, 1H), 7.79 (dd, J = 8.1, 1.4 Hz, 1H), 7.47 – 7.43 (m, 1H), 7.33 – 7.29 (m, 1H), 7.18 (dd, J = 8.2, 1.3 Hz, 1H), 7.09 – 7.04 (m, 3H), 6.95 (d, J = 7.5 Hz, 1H), 6.85 – 6.81 (m, 2H), 3.49 – 3.42 (m, 1H), 3.28 – 3.25 (m, 2H), 2.51 – 2.37 (m, 2H), 2.23 (s, 3H), 2.20 (s, 3H), 2.17 (s, 3H), 2.16 (s, 3H), 2.08 – 1.94 (m, 2H). **<sup>13</sup>C NMR (101 MHz, CDCl<sub>3</sub>)** δ 160.2, 156.7, 142.3, 140.0, 136.3, 136.2, 134.3, 133.6, 132.9, 130.9, 129.7, 129.64, 129.61, 129.4, 129.3, 128.8, 125.7, 125.2, 124.0, 115.6, 42.5, 40.5, 37.8, 33.3, 19.9, 19.7, 19.4, 19.2. **HRMS** (ESI/TOF-Q) m/z: [M+H]<sup>+</sup> Calculated for C<sub>28</sub>H<sub>30</sub>N<sub>2</sub>OH<sup>+</sup> 411.2431; Found 411.2430.

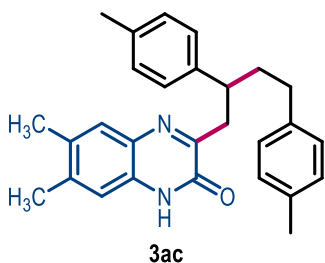

Compound, **3ac**: Yellow liquid; eluent (30% ethyl acetate in hexane). **Yield:** 85% (70 mg); **<sup>1</sup>H NMR (400 MHz, CDCl<sub>3</sub>)** δ 11.48 (s, 1H), 7.54 (s, 1H), 7.22 – 7.20 (m, 2H), 7.08 (d, *J* = 7.9 Hz, 2H), 7.01 – 6.96 (m, 5H), 3.50 – 3.43 (m, 1H), 3.31 – 3.18 (m, 2H), 2.49 – 2.39 (m, 2H), 2.36 – 2.34 (m, 6H), 2.27 – 2.26 (m, 6H), 2.11 – 1.96 (m, 2H). **<sup>13</sup>C NMR (101 MHz, CDCl<sub>3</sub>)** δ 158.8, 156.5, 141.8, 139.8, 139.6, 135.7, 135.1, 133.2, 131.4, 129.2, 129.0, 128.9(2C), 128.4, 127.9, 115.8, 42.6, 40.5, 37.9, 33.4, 21.14, 21.08, 20.2, 19.6. **HRMS (ESI/TOF-Q)** *m/z*: [M+H]<sup>+</sup> Calculated for C<sub>28</sub>H<sub>30</sub>N<sub>2</sub>OH<sup>+</sup> 411.2431; Found 411.2430.

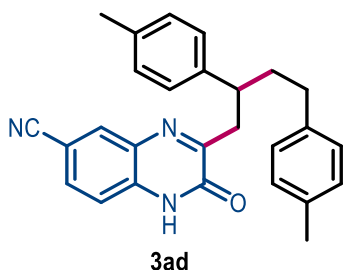

Compound, **3ad**: Yellow liquid; eluent (25% ethyl acetate in hexane). **Yield:** 89% (42 mg); **<sup>1</sup>H NMR (400 MHz, CDCl<sub>3</sub>)** δ 11.08 (bs, 1H), 8.07 (d, *J* = 1.8 Hz, 1H), 7.66 (dd, *J* = 8.4, 1.8 Hz, 1H), 7.24 – 7.22 (m, 1H), 7.17 (d, *J* = 8.0 Hz, 2H), 7.08 (d, *J* = 7.9 Hz, 2H), 7.05 – 6.98 (m, 4H), 3.49 – 3.40 (m, 1H), 3.33 – 3.21 (m, 2H), 2.54 – 2.42 (m, 2H), 2.29 – 2.28 (m, 6H), 2.10 – 1.96 (m, 2H). **<sup>13</sup>C NMR (126 MHz, CDCl<sub>3</sub>)** δ 162.7, 156.3, 141.2, 139.3, 136.0, 135.3, 134.0, 133.7, 132.3, 129.9, 129.6, 129.3, 129.1, 128.4, 127.9, 116.7, 107.8, 42.2, 40.2, 38.2, 33.3, 21.12, 21.09. **HRMS (ESI/TOF-Q)** *m/z*: [M+H]<sup>+</sup> Calculated for C<sub>27</sub>H<sub>25</sub>N<sub>3</sub>OH<sup>+</sup> 408.2070; Found 408.2077.

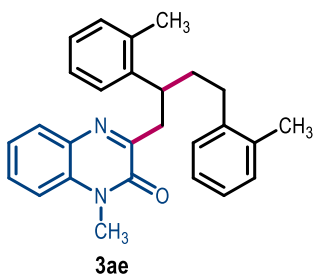

Compound, **3ae**: Yellow liquid; eluent (10% ethyl acetate in hexane). **Yield:** 92% (73 mg); **<sup>1</sup>H NMR (500 MHz, CDCl<sub>3</sub>)** δ 7.78 (dd, *J* = 8.0, 1.5 Hz, 1H), 7.51 – 7.48 (m, 1H), 7.39 (d, *J* = 7.7 Hz, 1H), 7.33 – 7.30 (m, 1H), 7.19 (t, *J* = 7.3 Hz, 1H), 7.11 – 7.07 (m, 2H), 7.06 – 7.02 (m, 5H), 3.93 – 3.86 (m, 1H), 3.66 (s, 3H), 3.42 – 3.37 (m, 1H), 3.23 – 3.18 (m, 1H), 2.55 – 2.46 (m, 2H), 2.43 (s, 3H) 2.13 (s, 3H), 2.06 – 1.91 (m, 2H). **<sup>13</sup>C NMR (126 MHz, CDCl<sub>3</sub>)** δ 159.5, 155.1, 143.3, 140.8, 136.6, 136.0, 133.1, 132.8, 130.3, 130.2, 129.8, 129.7, 128.8, 126.3, 126.02, 125.96, 125.9(2C), 123.6, 113.7, 40.9, 37.4, 36.8, 31.2, 29.2, 20.2, 19.2. **HRMS (ESI/TOF-Q)** *m/z*: [M+H]<sup>+</sup> Calculated for C<sub>27</sub>H<sub>28</sub>N<sub>2</sub>OH<sup>+</sup> 397.2274; Found 397.2275.

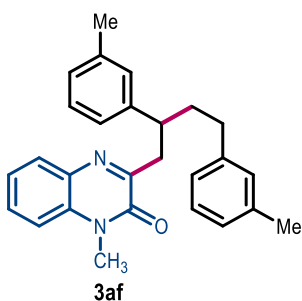

Compound, **3af**: Yellow liquid; eluent (10% ethyl acetate in hexane). **Yield:** 97% (77 mg); **<sup>1</sup>H NMR (400 MHz, CDCl<sub>3</sub>)** δ 7.79 (dd, *J* = 8.0, 1.5 Hz, 1H), 7.52 – 7.47 (m, 1H), 7.31 (t, *J* = 7.6 Hz, 1H), 7.24 (s, 1H), 7.19 – 7.08 (m, 4H), 6.98 (d, *J* = 7.0 Hz, 1H), 6.94 (d, *J* = 7.4 Hz, 1H), 6.90 – 6.88 (m, 2H), 3.66 (s, 3H), 3.52 – 3.45 (m, 1H), 3.29 – 3.27 (m, 2H), 2.52 – 2.42 (m, 2H), 2.32 (s, 3H), 2.27 (s, 3H), 2.11 – 1.96 (m, 2H). **<sup>13</sup>C NMR (101 MHz, CDCl<sub>3</sub>)** δ 159.6, 155.1, 145.0, 142.6, 137.9, 137.8, 133.2, 132.9, 129.9, 129.7, 129.3, 128.9, 128.3, 128.2, 127.0,

126.4, 125.5, 125.1, 123.6, 113.6, 42.8, 41.2, 37.9, 33.9, 29.1, 21.6, 21.5. **HRMS** (ESI/TOF-Q)  $m/z$ :  $[M+H]^+$  Calculated for  $C_{27}H_{28}N_2OH^+$  397.2274; Found 397.2280.

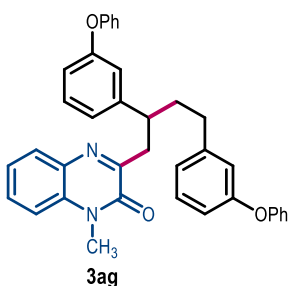

Compound, **3ag**: Yellow liquid; eluent (10% ethyl acetate in hexane). **Yield**: 91% (100 mg);  **$^1H$  NMR (500 MHz,  $CDCl_3$ )**  $\delta$  7.74 (d,  $J = 8.0$  Hz, 1H), 7.48 (t,  $J = 7.9$  Hz, 1H), 7.31 – 7.21 (m, 7H), 7.17 (t,  $J = 8.2$  Hz, 1H), 7.07 – 7.03 (m, 3H), 6.99 – 6.97 (m, 3H), 6.91 (d,  $J = 7.9$  Hz, 2H), 6.85 – 6.78 (m, 4H), 3.61 (s, 3H), 3.52 – 3.47 (m, 1H), 3.26 (d,  $J = 7.4$  Hz, 2H), 2.56 – 2.45 (m, 2H), 2.12 – 1.96 (m, 2H).  **$^{13}C$  NMR (126 MHz,  $CDCl_3$ )**  $\delta$  159.1, 157.6, 157.5, 157.2, 157.1, 154.9, 146.8, 144.5, 133.0, 132.7, 129.8, 129.74(2C), 129.71, 129.5, 123.6, 123.5, 123.1, 123.0, 119.1, 119.0, 118.8(2C), 118.6(2C), 117.1, 116.3, 113.6, 42.5, 41.0, 37.5, 33.7, 29.1. **HRMS** (ESI/TOF-Q)  $m/z$ :  $[M+H]^+$  Calculated for  $C_{37}H_{32}N_2O_3H^+$  553.2486; Found 553.2496.

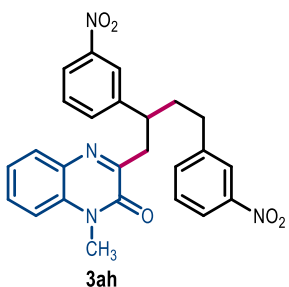

Compound, **3ah**: Yellow liquid; eluent (15% ethyl acetate in hexane). **Yield**: 78% (71 mg);  **$^1H$  NMR (500 MHz,  $CDCl_3$ )**  $\delta$  7.79 – 7.77 (m, 1H), 7.52 – 7.48 (m, 1H), 7.33 – 7.30 (m, 1H), 7.25 – 7.20 (m, 3H), 7.09 (d,  $J = 7.9$  Hz, 2H), 7.03 – 6.97 (m, 4H), 3.65 (s, 3H), 3.51 – 3.45 (m, 1H), 3.31 – 3.20 (m, 2H), 2.50 – 2.40 (m, 2H), 2.07 – 1.94 (m, 2H).  **$^{13}C$  NMR (126 MHz,  $CDCl_3$ )**  $\delta$  161.0, 154.4, 144.5, 142.4, 133.7, 132.5, 131.8, 130.6, 128.7, 128.5(2C), 128.4(2C), 128.0(2C), 127.3, 126.5, 126.2, 125.8, 115.1, 42.5, 41.0, 38.1, 33.8, 29.4. **HRMS** (ESI/TOF-Q)  $m/z$ :  $[M+H]^+$  Calculated for  $C_{25}H_{22}N_4O_5H^+$  459.1663; Found 459.1660.

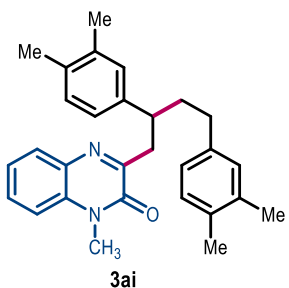

Compound, **3ai**: Yellow liquid; eluent (10% ethyl acetate in hexane). **Yield**: 87% (74 mg);  **$^1H$  NMR (400 MHz,  $CDCl_3$ )**  $\delta$  7.79 (dd,  $J = 8.0, 1.5$  Hz, 1H), 7.52 – 7.47 (m, 1H), 7.34 – 7.30 (m, 1H), 7.25 – 7.24 (1H), 7.11 – 7.05 (m, 3H), 6.98 – 6.96 (m, 1H), 6.85 – 6.81 (m, 2H), 3.66 (s, 3H), 3.49 – 3.42 (m, 1H), 3.29 – 3.22 (m, 2H), 2.54 – 2.34 (m, 2H), 2.24 (s, 3H), 2.21 (s, 3H), 2.19 (s, 3H), 2.17 (s, 3H), 2.05 – 1.95 (m, 2H).  **$^{13}C$  NMR (126 MHz,  $CDCl_3$ )**  $\delta$  159.7, 155.1, 142.5, 140.2, 136.4, 136.3, 134.3, 133.7, 133.2, 132.9, 129.9 (2C), 129.7 (2C), 129.6, 129.5, 125.8, 125.4, 123.6, 113.6, 42.4, 41.4, 38.0, 33.5, 29.2, 20.0, 19.8, 19.5, 19.4. **HRMS** (ESI/TOF-Q)  $m/z$ :  $[M+H]^+$  Calculated for  $C_{29}H_{32}N_2OH^+$  425.2587; Found 425.2590.



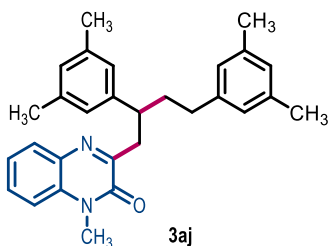

Compound, **3aj**: Yellow liquid; eluent (15% ethyl acetate in hexane). **Yield**: 95% (81 mg); **<sup>1</sup>H NMR (400 MHz, CDCl<sub>3</sub>)** δ 7.80 (dd, *J* = 8.0, 1.5 Hz, 1H), 7.52 – 7.48 (m, 1H), 7.34 – 7.30 (m, 1H), 7.253 – 7.249 (m, 1H), 6.95 (bs, 2H), 6.81 (s, 1H), 6.76 (s, 1H), 6.70 (bs, 2H), 3.67 (s, 3H), 3.49 – 3.40 (m, 1H), 3.25 (d, *J* = 7.3 Hz, 2H), 2.49 – 2.35 (m, 2H), 2.28 (s, 6H), 2.22 (s, 6H), 2.04 – 1.95 (m, 2H). **<sup>13</sup>C NMR (126 MHz, CDCl<sub>3</sub>)** δ 159.7, 155.1, 145.0, 142.6, 137.7 (2C), 133.2, 132.8, 129.9, 129.7, 127.9, 127.3, 126.3, 125.9, 123.6, 113.6, 42.7, 41.3, 37.7, 33.8, 29.1, 21.5, 21.3. **HRMS (ESI/TOF-Q)** *m/z*: [M+H]<sup>+</sup> Calculated for C<sub>29</sub>H<sub>32</sub>N<sub>2</sub>OH<sup>+</sup> 425.2587; Found 425.2591.

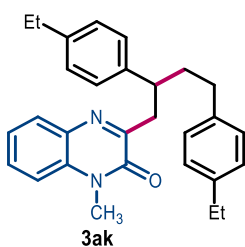

Compound, **3ak**: Yellow liquid; eluent (10% ethyl acetate in hexane). **Yield**: 92% (78 mg); **<sup>1</sup>H NMR (500 MHz, CDCl<sub>3</sub>)** δ 7.78 (dd, *J* = 8.0, 1.5 Hz, 1H), 7.51 – 7.48 (m, 1H), 7.33 – 7.30 (m, 1H), 7.25 – 7.23 (m, 3H), 7.11 (d, *J* = 7.9 Hz, 2H), 7.05 – 7.00 (m, 4H), 3.65 (s, 3H), 3.51 – 3.45 (m, 1H), 3.26 (t, *J* = 7.2 Hz, 2H), 2.62 – 2.56 (m, 4H), 2.51 – 2.40 (m, 2H), 2.08 – 1.96 (m, 2H), 1.22 – 1.18 (m, 6H). **<sup>13</sup>C NMR (126 MHz, CDCl<sub>3</sub>)** δ 159.7, 155.1, 142.1, 142.0, 141.5, 139.9, 133.1, 132.8, 129.9, 129.7, 128.4(2C), 128.0, 127.9, 127.8, 123.6, 113.6, 42.5, 41.3, 37.9, 33.5, 29.2, 28.5, 15.8, 15.6. **HRMS (ESI/TOF-Q)** *m/z*: [M+H]<sup>+</sup> Calculated for C<sub>29</sub>H<sub>32</sub>N<sub>2</sub>OH<sup>+</sup> 425.2587; Found 425.2587.

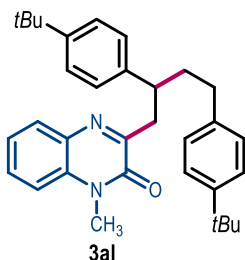

Compound, **3al**: Yellow liquid; eluent (15% ethyl acetate in hexane). **Yield**: 90% (87 mg); **<sup>1</sup>H NMR (400 MHz, CDCl<sub>3</sub>)** δ 7.77 – 7.74 (m, 1H), 7.50 – 7.45 (m, 1H), 7.31 – 7.27 (m, 2H), 7.24 – 7.21 (m, 6H), 7.02 (d, *J* = 7.9 Hz, 2H), 3.63 (s, 3H), 3.50 – 3.46 (m, 1H), 3.26 (d, *J* = 7.3 Hz, 2H), 2.50 – 2.45 (m, 2H), 2.09 – 1.97 (m, 2H), 1.28 – 1.27 (m, 18H). **<sup>13</sup>C NMR (101 MHz, CDCl<sub>3</sub>)** δ 159.8, 155.2, 149.0, 148.5, 141.9, 139.7, 133.2, 132.9, 129.9, 129.6, 128.1, 127.7, 125.3, 125.2, 123.5, 113.6, 42.5, 41.3, 37.7, 34.5, 34.4, 33.4, 31.6(2C), 29.1. **HRMS (ESI/TOF-Q)** *m/z*: [M+H]<sup>+</sup> Calculated for C<sub>33</sub>H<sub>40</sub>N<sub>2</sub>OH<sup>+</sup> 481.3213; Found 481.3224.

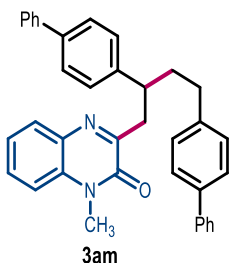

Compound, **3am**: Yellow liquid; eluent (10% ethyl acetate in hexane). **Yield**: 85% (88 mg); **<sup>1</sup>H NMR (400 MHz, CDCl<sub>3</sub>)** δ 7.88 (dd, *J* = 8.0, 1.5 Hz, 1H), 7.80 (dd, *J* = 8.0, 1.5 Hz, 1H), 7.60 – 7.52 (m, 8H), 7.48 – 7.46 (m, 1H), 7.45 – 7.40 (m, 7H), 7.34 – 7.29 (m, 3H), 7.21 – 7.19 (m, 1H), 3.65 (s, 3H), 3.64 – 3.58 (m, 1H), 3.37 – 3.31 (m, 2H), 2.65 – 2.54 (m, 2H), 2.22 – 2.05 (m, 2H). **<sup>13</sup>C NMR (101 MHz, CDCl<sub>3</sub>)** δ 159.3, 155.0, 143.9, 141.6, 141.2, 140.8, 139.0, 138.6, 133.0, 132.7, 129.75, 129.67, 129.1, 128.9, 128.7, 128.4, 127.13, 127.05, 127.02,

126.97, 123.6, 123.5, 113.6, 113.5, 42.3, 41.0, 35.9, 33.4, 29.1.  
**HRMS** (ESI/TOF-Q)  $m/z$ :  $[M+H]^+$  Calculated for  $C_{37}H_{32}N_2OH^+$  521.2587; Found 521.2586.

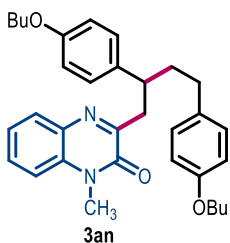

Compound, **3an**: Yellow liquid; eluent (20% ethyl acetate in hexane). **Yield**: 82% (84 mg);  **$^1H$  NMR (500 MHz,  $CDCl_3$ )**  $\delta$  7.78 (dd,  $J = 7.9, 1.6$  Hz, 1H), 7.49 (t,  $J = 7.8$  Hz, 1H), 7.31 (t,  $J = 7.5$  Hz, 1H), 7.24 (s, 1H), 7.20 (d,  $J = 8.5$  Hz, 2H), 6.98 (d,  $J = 8.4$  Hz, 2H), 6.80 (d,  $J = 8.5$  Hz, 2H), 6.75 (d,  $J = 8.4$  Hz, 2H), 3.94 – 3.90 (m, 4H), 3.64 (s, 3H), 3.47 – 3.41 (m, 1H), 3.29 – 3.19 (m, 2H), 2.48 – 2.36 (m, 2H), 2.05 – 1.90 (m, 2H), 1.73 (p,  $J = 7.2$  Hz, 4H), 1.47 (h,  $J = 7.4$  Hz, 4H), 0.96 (t,  $J = 7.3$  Hz, 6H).  **$^{13}C$  NMR (126 MHz,  $CDCl_3$ )**  $\delta$  159.6, 157.5, 157.2, 154.9, 136.6, 134.4, 133.0, 132.7, 129.7, 129.5, 129.2, 128.8, 123.4, 114.3(2C), 113.5, 67.7, 67.6, 41.8, 41.2, 38.2, 32.8, 31.44, 31.42, 29.0, 19.3(2C), 13.9(2C). **HRMS** (ESI/TOF-Q)  $m/z$ :  $[M+H]^+$  Calculated for  $C_{33}H_{40}N_2O_3H^+$  513.3112; Found 513.3115.

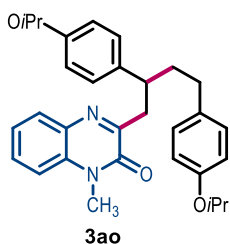

Compound, **3ao**: Yellow liquid; eluent (15% ethyl acetate in hexane). **Yield**: 91% (88 mg);  **$^1H$  NMR (400 MHz,  $CDCl_3$ )**  $\delta$  7.79 – 7.76 (m, 1H), 7.51 – 7.47 (m, 1H), 7.32 – 7.28 (m, 1H), 7.24 – 7.23 (m, 1H), 7.20 – 7.17 (m, 2H), 6.99 – 6.96 (m, 2H), 6.81 – 6.72 (m, 4H), 4.51 – 4.43 (m, 2H), 3.64 (s, 3H), 3.47 – 3.40 (m, 1H), 3.26 – 3.23 (m, 2H), 2.48 – 2.37 (m, 2H), 2.08 – 1.90 (m, 2H), 1.31 – 1.29 (m, 12H).  **$^{13}C$  NMR (101 MHz,  $CDCl_3$ )**  $\delta$  159.8, 156.4, 156.1, 155.1, 136.9, 134.8, 133.2, 132.8, 129.9, 129.7, 129.4, 129.0, 123.6, 116.02, 115.98, 113.6, 70.2, 70.1, 42.1, 41.4, 38.3, 33.0, 29.1, 22.3(2C). **HRMS** (ESI/TOF-Q)  $m/z$ :  $[M+H]^+$  Calculated for  $C_{31}H_{36}N_2O_3H^+$  485.2799; Found 485.2808.

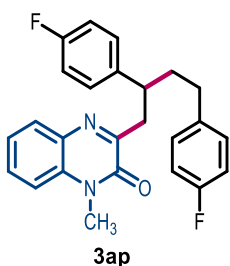

Compound, **3ap**: Yellow liquid; eluent (15% ethyl acetate in hexane). **Yield**: 84% (66 mg);  **$^1H$  NMR (400 MHz,  $CDCl_3$ )**  $\delta$  7.76 (dd,  $J = 7.9, 1.5$  Hz, 1H), 7.53 – 7.49 (m, 1H), 7.34 – 7.30 (m, 1H), 7.273 – 7.270 (m, 1H), 7.25 – 7.22 (m, 2H), 7.05 – 7.00 (m, 2H), 6.98 – 6.93 (m, 2H), 6.92 – 6.87 (m, 2H), 3.65 (s, 3H), 3.51 – 3.44 (m, 1H), 3.25 (dd,  $J = 7.4, 2.2$  Hz, 2H), 2.50 – 2.40 (m, 2H), 2.11 – 1.91 (m, 2H).  **$^{13}C$  NMR (126 MHz,  $CDCl_3$ )**  $\delta$  161.5 (d,  $J = 243.8$  Hz), 161.3 (d,  $J = 243.0$  Hz), 159.1, 155.0, 140.2 (d,  $J = 3.5$  Hz), 137.9 (d,  $J = 3.4$  Hz), 133.1, 132.7, 129.9, 129.81 (d,  $J = 7.5$  Hz), 129.77, 129.4 (d,  $J = 7.5$  Hz), 123.7, 115.2 (d,  $J = 21.2$  Hz), , 115.0 (d,  $J = 21.2$  Hz), 113.7, 41.9, 41.1, 38.2, 33.0, 29.2.  **$^{19}F$  NMR (376 MHz,  $CDCl_3$ )**  $\delta$  -117.04, -117.95. **HRMS** (ESI/TOF-Q)  $m/z$ :

$[M+H]^+$  Calculated for  $C_{25}H_{22}F_2N_2OH^+$  405.1773; Found 405.1772.

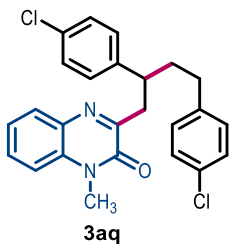

Compound, **3aq**: Yellow solid; mp = 102–104 °C; eluent (15% ethyl acetate in hexane). **Yield**: 79% (69 mg);  **$^1H$  NMR (400 MHz,  $CDCl_3$ )**  $\delta$  7.76 (dd,  $J$  = 8.0, 1.6 Hz, 1H), 7.53 – 7.49 (m, 1H), 7.34 – 7.30 (m, 1H), 7.28 – 7.27 (m, 1H), 7.25 – 7.24 (m, 1H), 7.23 – 7.22 (m, 3H), 7.20 – 7.16 (m, 2H), 7.01 – 6.99 (m, 2H), 3.65 (s, 3H), 3.51 – 3.44 (m, 1H), 3.29 – 3.21 (m, 2H), 2.51 – 2.41 (m, 2H), 2.12 – 1.91 (m, 2H).  **$^{13}C$  NMR (101 MHz,  $CDCl_3$ )**  $\delta$  158.9, 155.0, 143.1, 140.6, 133.1, 132.8, 132.1, 131.6, 130.0(2C), 129.9, 129.5, 128.7, 128.5, 123.7, 113.7, 42.0, 40.8, 37.8, 33.1, 29.2. **HRMS** (ESI/TOF-Q)  $m/z$ :  $[M+H]^+$  Calculated for  $C_{25}H_{22}Cl_2N_2OH^+$  437.1182; Found 437.1182.

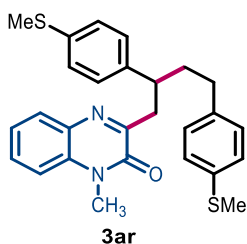

Compound, **3ar**: Yellow liquid; eluent (20% ethyl acetate in hexane). **Yield**: 90% (83 mg);  **$^1H$  NMR (500 MHz,  $CDCl_3$ )**  $\delta$  7.76 (d,  $J$  = 8.0 Hz, 1H), 7.51 – 7.48 (m, 1H), 7.35 – 7.29 (m, 2H), 7.24 – 7.22 (m, 2H), 7.18 (d,  $J$  = 8.0 Hz, 2H), 7.13 (d,  $J$  = 7.9 Hz, 2H), 7.00 (d,  $J$  = 7.8 Hz, 2H), 3.64 (s, 3H), 3.49 – 3.43 (m, 1H), 3.30 – 3.19 (m, 2H), 2.48 – 2.40 (m, 8H), 2.08 – 1.90 (m, 2H).  **$^{13}C$  NMR (126 MHz,  $CDCl_3$ )**  $\delta$  159.3, 155.0, 141.9, 139.6, 135.8, 135.1, 133.1, 132.8, 129.84, 129.80, 129.1, 128.6, 127.3, 127.0, 123.6, 113.7, 42.1, 41.0, 37.9, 33.3, 29.2, 16.5, 16.2. **HRMS** (ESI/TOF-Q)  $m/z$ :  $[M+H]^+$  Calculated for  $C_{27}H_{28}N_2OS_2H^+$  461.1716; Found 461.1715.

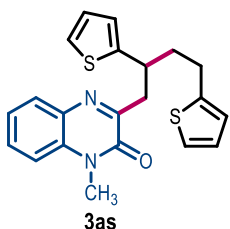

Compound, **3as**: Yellow liquid; eluent (15% ethyl acetate in hexane). **Yield**: 82% (62 mg);  **$^1H$  NMR (500 MHz,  $CDCl_3$ )**  $\delta$  7.81 – 7.79 (m, 1H), 7.54 – 7.50 (m, 1H), 7.33 (t,  $J$  = 7.6 Hz, 1H), 7.28 (s, 1H), 7.13 – 7.11 (m, 1H), 7.08 – 7.07 (m, 1H), 6.91 – 6.88 (m, 3H), 6.753 – 6.746 (m, 1H), 3.94 – 3.88 (m, 1H), 3.67 (s, 3H), 3.37 – 3.29 (m, 2H), 2.87 – 2.76 (m, 2H), 2.23 – 2.07 (m, 2H).  **$^{13}C$  NMR (126 MHz,  $CDCl_3$ )**  $\delta$  158.7, 155.0, 148.4, 145.1, 133.2, 132.8, 130.0, 129.9, 126.8, 126.6, 124.4, 124.3, 123.7, 123.3, 123.0, 113.7, 41.9, 39.2, 37.7, 29.2, 27.8. **HRMS** (ESI/TOF-Q)  $m/z$ :  $[M+H]^+$  Calculated for  $C_{21}H_{20}N_2OS_2H^+$  381.1090; Found 381.1100.

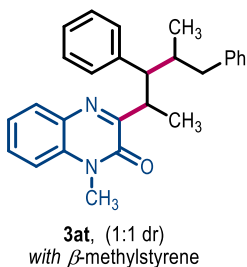

Compound, **3at**: Yellow liquid; eluent (15% ethyl acetate in hexane). **Yield**: 91% (72 mg);  **$^1H$  NMR (500 MHz,  $CDCl_3$ )**  $\delta$  7.82 (dd,  $J$  = 8.0, 1.6 Hz, 1H), 7.67 – 7.64 (m, 1H), 7.53 – 7.46 (m, 2H), 7.38 – 7.33 (m, 5H), 7.30 – 7.27 (m, 5H), 7.23 – 7.20 (m, 2H), 7.18 – 7.15 (m, 5H), 7.11 – 7.07 (m, 3H), 7.05 – 7.03 (m, 2H), 6.95 (d,  $J$  = 7.2 Hz, 2H), 3.61 – 3.56 (m, 6H), 3.35 – 3.24 (m, 4H), 3.16 – 3.12 (m, 1H), 2.67 – 2.62 (m, 1H), 2.59 –

2.55 (m, 2H), 2.42 – 2.26 (m, 1H), 2.10 – 2.06 (m, 1H), 1.59 – 1.55 (m, 6H), 1.34 (d,  $J = 7.0$  Hz, 3H), 1.14 (d,  $J = 7.0$  Hz, 3H).  $^{13}\text{C}$  NMR (101 MHz,  $\text{CDCl}_3$ )  $\delta$  159.9, 159.1, 155.4, 155.2, 149.5, 149.4, 147.5, 147.2, 133.2, 132.6, 130.03, 129.96, 129.74, 129.68, 128.5, 128.4, 128.2, 127.9, 127.8, 127.4, 127.3, 127.2, 126.9, 126.2, 125.70, 125.66, 125.6, 125.4, 123.6, 123.4, 113.6, 113.5, 50.5, 50.2, 46.0, 44.0, 43.4, 42.4, 37.5, 37.0, 36.8, 29.3, 25.55, 25.46, 24.3, 21.9. **HRMS** (ESI/TOF-Q)  $m/z$ :  $[\text{M}+\text{H}]^+$  Calculated for  $\text{C}_{27}\text{H}_{28}\text{N}_2\text{OH}^+$  397.2274; Found 397.2279.

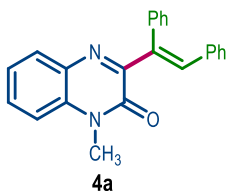

Compound, **4a**: Yellow sticky liquid; eluent (10% ethyl acetate in hexane). **Yield**: 55% (37 mg);  $^1\text{H}$  NMR (400 MHz,  $\text{CDCl}_3$ )  $\delta$  7.82 – 7.79 (m, 1H), 7.51 – 7.47 (m, 2H), 7.25 – 7.22 (m, 10H), 7.21 – 7.20 (m, 1H), 7.15 (s, 1H), 3.57 (s, 3H).  $^{13}\text{C}$  NMR (101 MHz,  $\text{CDCl}_3$ )  $\delta$  155.1, 150.2, 141.5, 133.4, 133.3, 131.1, 130.6, 128.32(2C), 128.26, 128.2(2C), 127.8(2C), 123.8, 114.3(2C), 113.8, 28.8. **HRMS** (ESI/TOF-Q)  $m/z$ :  $[\text{M}+\text{H}]^+$  Calculated for  $\text{C}_{23}\text{H}_{18}\text{N}_2\text{OH}^+$  339.1492; Found 339.1495.

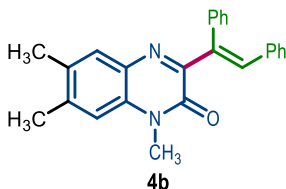

Compound, **4b**: Yellow liquid; eluent (10% ethyl acetate in hexane). **Yield**: 56% (41 mg);  $^1\text{H}$  NMR (500 MHz,  $\text{CDCl}_3$ )  $\delta$  8.18 (s, 1H), 7.57 (s, 1H), 7.28 – 7.26 (m, 10H), 7.04 (s, 1H), 3.60 (s, 3H), 2.37 (s, 3H), 2.30 (s, 3H).  $^{13}\text{C}$  NMR (126 MHz,  $\text{CDCl}_3$ )  $\delta$  155.3, 150.2, 149.1, 141.6, 141.1, 132.9, 132.0, 131.3, 130.6, 128.4(2C), 128.29, 128.26(2C), 127.8(2C), 114.45, 114.39, 28.8, 20.7, 19.3. **HRMS** (ESI/TOF-Q)  $m/z$ :  $[\text{M}+\text{H}]^+$  Calculated for  $\text{C}_{25}\text{H}_{22}\text{N}_2\text{OH}^+$  367.1805; Found 367.1801.

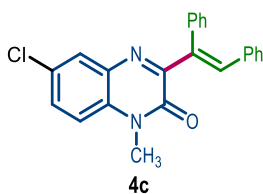

Compound, **4c**: Yellow sticky liquid; eluent (10% ethyl acetate in hexane). **Yield**: 51% (38 mg);  $^1\text{H}$  NMR (400 MHz,  $\text{CDCl}_3$ )  $\delta$  7.822 – 7.816 (m, 1H), 7.49 (dd,  $J = 8.0, 2.4$  Hz, 1H), 7.29 – 7.27 (m, 10H), 7.21 (s, 1H), 7.19 (s, 1H), 3.61 (s, 3H).  $^{13}\text{C}$  NMR (101 MHz,  $\text{CDCl}_3$ )  $\delta$  154.8, 151.6(2C), 150.2, 141.6, 134.0, 132.1, 131.1, 130.0, 129.3, 128.4(2C), 128.3(2C), 127.8(2C), 115.0, 114.3, 29.0. **HRMS** (ESI/TOF-Q)  $m/z$ :  $[\text{M}+\text{H}]^+$  Calculated for  $\text{C}_{23}\text{H}_{17}\text{ClN}_2\text{ONH}_4^+$  390.1368; Found 390.1363.

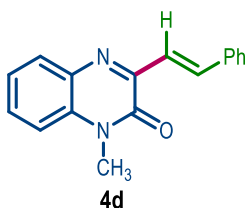

Compound, **4d**: Yellow liquid; eluent (10% ethyl acetate in hexane). **Yield**: 22% (11 mg);  $^1\text{H}$  NMR (400 MHz,  $\text{CDCl}_3$ )  $\delta$  7.86 (d,  $J = 7.9$  Hz, 1H), 7.64 (d,  $J = 7.4$  Hz, 1H), 7.58 – 7.53 (m, 1H), 7.36 – 7.28 (m, 5H), 7.25 – 7.24 (m, 1H), 7.07 (d,  $J = 14.0$  Hz, 1H), 6.72 (d,  $J = 13.9$  Hz, 1H), 3.65 (s, 3H).  $^{13}\text{C}$

**NMR (126 MHz, CDCl<sub>3</sub>)**  $\delta$  155.2, 150.3, 137.3, 136.0, 133.5, 132.4, 131.2, 130.6, 128.9, 128.4, 126.2, 123.9, 113.9, 106.6, 28.8. **HRMS** (ESI/TOF-Q) m/z: [M+H]<sup>+</sup> Calculated for C<sub>17</sub>H<sub>14</sub>N<sub>2</sub>OH<sup>+</sup> 263.1179; Found 263.1183.

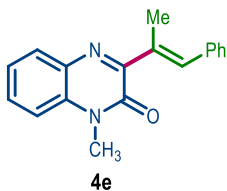

Compound, **4e**: Yellow sticky liquid; eluent (10% ethyl acetate in hexane). **Yield**: 69% (38 mg); **<sup>1</sup>H NMR (400 MHz, CDCl<sub>3</sub>)**  $\delta$  7.63 – 7.61 (m, 1H), 7.51 – 7.52 (m, 1H), 7.28 – 7.26 (m, 6H), 7.21 – 7.17 (m, 1H), 6.46 (s, 1H), 3.62 (s, 3H), 2.62 (s, 3H). **<sup>13</sup>C NMR (101 MHz, CDCl<sub>3</sub>)**  $\delta$  155.0, 150.2, 143.3, 141.2, 133.4, 133.3, 131.1, 130.5, 128.2, 127.4, 125.5, 123.8, 113.8, 112.4, 28.7, 21.8. **HRMS** (ESI/TOF-Q) m/z: [M+H]<sup>+</sup> Calculated for C<sub>18</sub>H<sub>16</sub>N<sub>2</sub>OH<sup>+</sup> 277.1335; Found 277.1330.

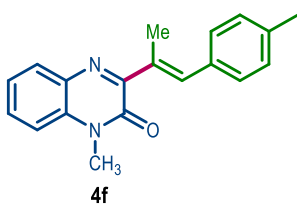

Compound, **4f**: Yellow sticky liquid; eluent (7% ethyl acetate in hexane). **Yield**: 64% (37 mg); **<sup>1</sup>H NMR (400 MHz, CDCl<sub>3</sub>)**  $\delta$  7.55 – 7.54 (m, 1H), 7.24 – 7.21 (m, 4H), 7.19 – 7.18 (m, 2H), 7.00 (d, J = 7.6 Hz, 1H), 6.69 (s, 1H), 3.58 (s, 3H), 2.34 (s, 3H), 2.27 (s, 3H). **<sup>13</sup>C NMR (101 MHz, CDCl<sub>3</sub>)**  $\delta$  155.4, 149.2, 141.2, 137.4, 136.1, 132.9, 132.1, 131.5, 130.7, 129.0, 128.5, 126.3, 114.5, 106.7, 28.9, 20.8, 19.3. **HRMS** (ESI/TOF-Q) m/z: [M+H]<sup>+</sup> Calculated for C<sub>19</sub>H<sub>18</sub>N<sub>2</sub>OH<sup>+</sup> 291.1492; Found 291.1498.

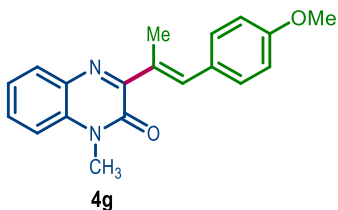

Compound, **4g**: Yellow sticky liquid; eluent (7% ethyl acetate in hexane). **Yield**: 48% (32 mg); **<sup>1</sup>H NMR (400 MHz, CDCl<sub>3</sub>)**  $\delta$  7.78 – 7.75 (m, 1H), 7.49 – 7.45 (m, 1H), 7.36 (d, J = 7.3 Hz, 1H), 7.24 – 7.18 (m, 4H), 7.16 – 7.15 (m, 1H), 6.79 (s, 1H), 3.68 (s, 3H), 3.54 (s, 3H), 2.05 (s, 3H). **<sup>13</sup>C NMR (101 MHz, CDCl<sub>3</sub>)**  $\delta$  158.8, 154.7, 151.1, 137.5, 136.7, 134.8, 133.8, 132.6, 132.3, 129.1, 126.1, 116.4, 115.4, 112.6, 50.1, 28.8, 21.1. **HRMS** (ESI/TOF-Q) m/z: [M+H]<sup>+</sup> Calculated for C<sub>19</sub>H<sub>18</sub>N<sub>2</sub>O<sub>2</sub>Na<sup>+</sup> 329.1260; Found 329.1262.

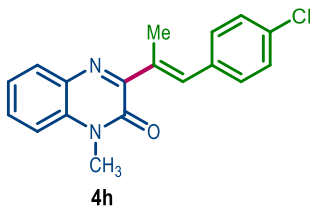

Compound, **4h**: Yellow sticky liquid; eluent (7% ethyl acetate in hexane). **Yield**: 59% (37 mg); **<sup>1</sup>H NMR (500 MHz, CDCl<sub>3</sub>)**  $\delta$  7.82 – 7.80 (m, 1H), 7.54 – 7.51 (m, 2H), 7.31 – 7.28 (m, 2H), 7.24 – 7.22 (m, 2H), 7.05 (d, J = 8.2 Hz, 1H), 6.62 (s, 1H), 3.60 (s, 3H), 2.27 (s, 3H). **<sup>13</sup>C NMR (126 MHz, CDCl<sub>3</sub>)**  $\delta$  155.0, 150.1, 137.6, 136.7, 134.8, 133.3, 133.2, 131.1, 130.5, 129.2, 126.1, 123.7, 113.8, 112.7, 28.7, 21.2. **HRMS** (ESI/TOF-Q) m/z: [M+H]<sup>+</sup> Calculated for C<sub>18</sub>H<sub>15</sub>ClN<sub>2</sub>OH<sup>+</sup> 311.0946; Found 311.0940.

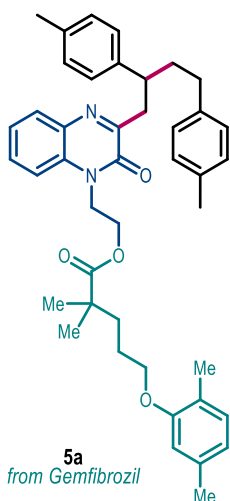

Compound, **5a**: Yellow liquid; eluent (20% ethyl acetate in hexane). **Yield**: 94% (123 mg); **<sup>1</sup>H NMR (400 MHz, CDCl<sub>3</sub>)** δ 7.80 – 7.77 (m, 1H), 7.52 – 7.42 (m, 2H), 7.32 – 7.28 (m, 1H), 7.21 – 7.19 (m, 2H), 7.11 – 6.98 (m, 7H), 6.67 – 6.65 (m, 1H), 6.58 (bs, 1H), 4.47 – 4.44 (m, 2H), 4.37 – 4.32 (m, 2H), 3.82 – 3.79 (m, 2H), 3.51 – 3.48 (m, 1H), 3.34 – 3.19 (m, 2H), 2.49 – 2.42 (m, 2H), 2.32 (s, 3H), 2.30 (s, 6H), 2.17 (s, 3H), 2.11 – 1.96 (m, 2H), 1.68 – 1.62 (m, 4H), 1.12 (s, 6H). **<sup>13</sup>C NMR (101 MHz, CDCl<sub>3</sub>)** δ 177.9, 159.5, 157.0, 154.7, 141.6, 139.5, 136.6, 135.7, 135.1, 132.9, 132.6, 130.4, 130.1, 129.8, 129.1, 129.0, 128.4, 127.9, 123.7, 123.6, 120.8, 113.9, 112.1, 67.8, 60.9, 42.5, 42.2, 41.1, 40.7, 38.1, 37.1, 33.4, 25.13, 25.10, 21.5, 21.13, 21.09, 15.9. **HRMS (ESI/TOF-Q) m/z**: [M+H]<sup>+</sup> Calculated for C<sub>43</sub>H<sub>50</sub>N<sub>2</sub>O<sub>4</sub>H<sup>+</sup> 659.3843; Found 659.3841.

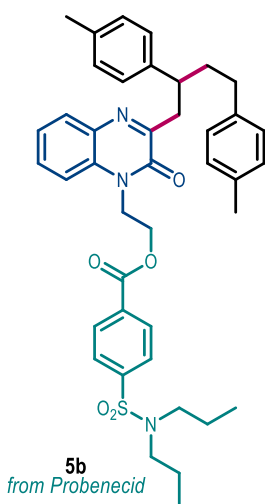

Compound, **5b**: Yellow liquid; eluent (25% ethyl acetate in hexane). **Yield**: 96% (42 mg); **<sup>1</sup>H NMR (400 MHz, CDCl<sub>3</sub>)** δ 8.09 – 8.00 (m, 3H), 7.85 – 7.79 (m, 2H), 7.80 – 7.72 (m, 1H), 7.62 – 7.52 (m, 2H), 7.26 – 7.19 (m, 3H), 7.15 – 6.69 (m, 5H), 4.86 – 4.52 (m, 4H), 4.43 – 4.20 (m, 2H), 3.12 – 3.08 (m, 4H), 2.43 – 2.40 (m, 1H), 2.36 – 2.30 (m, 2H), 2.19 (bs, 6H), 1.58 – 1.52 (m, 6H), 0.89 – 0.85 (m, 6H). **<sup>13</sup>C NMR (126 MHz, CDCl<sub>3</sub>)** δ 165.1, 155.2, 151.9, 144.5, 139.2, 139.0, 138.9, 135.9, 133.2, 130.34, 130.31, 129.1, 128.93, 128.87, 128.8, 128.7, 128.4, 126.98, 126.95, 126.6, 126.5, 63.8, 63.6, 50.0, 48.8, 27.2, 22.0, 21.03, 21.00, 12.6, 11.2(2C). **HRMS (ESI/TOF-Q) m/z**: [M+H]<sup>+</sup> Calculated for C<sub>41</sub>H<sub>47</sub>N<sub>3</sub>O<sub>5</sub>SH<sup>+</sup> 694.3309; Found 694.3310.

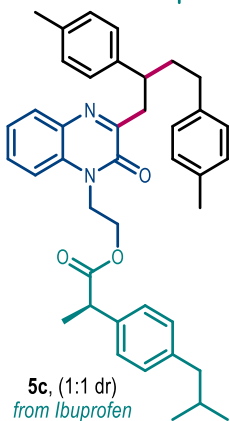

Compound, **5c**: Yellow liquid; eluent (15% ethyl acetate in hexane). **Yield**: 88% (108 mg); **<sup>1</sup>H NMR (400 MHz, CDCl<sub>3</sub>)** δ 7.77 (dd, J = 8.0, 1.6 Hz, 1H), 7.44 – 7.39 (m, 1H), 7.32 – 7.29 (m, 2H), 7.19 – 7.16 (m, 2H), 7.09 – 6.97 (m, 10H), 4.52 – 4.23 (m, 4H), 3.60 – 3.55 (m, 1H), 3.48 – 3.40 (m, 1H), 3.31 – 3.17 (m, 2H), 2.53 – 2.45 (m, 2H), 2.43 (d, J = 7.1 Hz, 2H), 2.28 (bs, 6H), 2.08 – 1.97 (m, 2H), 1.88 – 1.81 (m, 1H), 1.40 (d, J = 7.1 Hz, 3H), 0.90 (d, J = 6.6 Hz, 6H). **<sup>13</sup>C NMR (101 MHz, CDCl<sub>3</sub>)** δ 174.8, 159.6, 154.8, 141.72, 141.69(C\*), 140.8, 139.6, 137.4, 135.7, 135.1, 133.0, 132.7, 130.1, 129.7, 129.5, 129.1, 129.0, 128.4, 128.0, 127.2, 123.6, 113.8, 61.2, 45.21, 45.17(C\*), 42.61, 42.57(C\*), 41.1, 40.9, 38.1, 33.5, 30.3, 22.5, 21.12, 21.08, 18.5(2C). **HRMS (ESI/TOF-Q) m/z**: [M+H]<sup>+</sup> Calculated for C<sub>41</sub>H<sub>46</sub>N<sub>2</sub>O<sub>3</sub>H<sup>+</sup> 615.3581; Found 615.3585. C\* is another diastereomer.

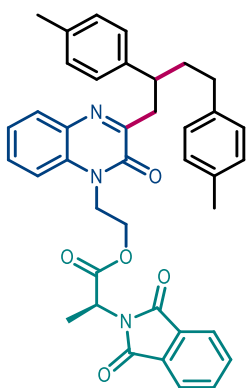

**5d**, (1:1 dr)  
from Alanine

Compound, **5d**: Yellow liquid; eluent (15% ethyl acetate in hexane). **Yield**: 77% (96 mg); **<sup>1</sup>H NMR (400 MHz, CDCl<sub>3</sub>)** δ 8.25 – 8.09 (m, 1H), 8.04 – 7.84 (m, 1H), 7.82 – 7.70 (m, 2H), 7.68 – 7.50 (m, 5H), 7.40 – 7.28 (m, 5H), 7.24 – 7.00 (m, 2H), 4.69 – 4.49 (m, 4H), 4.40 – 4.35 (m, 1H), 2.81 – 2.73 (m, 1H), 2.35 – 2.26 (m, 2H), 1.58 (bs, 6H), 1.45 – 1.39 (m, 2H), 1.17 – 1.11 (m, 2H), 0.91 – 0.88 (m, 3H). **<sup>13</sup>C NMR (101 MHz, CDCl<sub>3</sub>)** δ 168.9, 167.8, 165.3, 155.3, 139.4, 136.9, 134.3, 133.9, 131.7, 130.3, 129.1, 128.5, 127.4, 126.9, 126.4, 125.9, 124.8, 123.6, 123.4, 116.2, 107.3, 63.9, 63.5, 60.3, 57.7, 29.8, 28.8, 21.0, 19.5, 15.6, 14.6. **HRMS (ESI/TOF-Q)** m/z: [M+H]<sup>+</sup> Calculated for C<sub>39</sub>H<sub>37</sub>N<sub>3</sub>O<sub>5</sub>H<sup>+</sup> 628.2806; Found 628.2801.

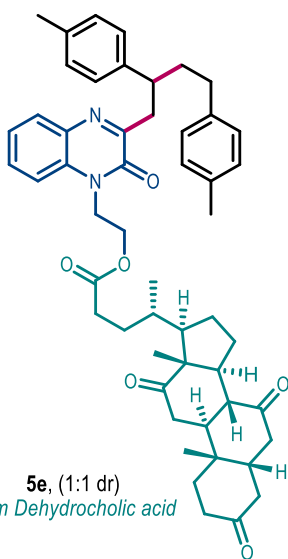

**5e**, (1:1 dr)  
from Dehydrocholic acid

Compound, **5e**: Yellow liquid; eluent (25% ethyl acetate in hexane). **Yield**: 69% (114 mg); **<sup>1</sup>H NMR (400 MHz, CDCl<sub>3</sub>)** δ 7.78 (dd, *J* = 8.1, 1.3 Hz, 1H), 7.47 – 7.42 (m, 1H), 7.34 – 7.28 (m, 2H), 7.22 – 7.15 (m, 3H), 7.11 – 7.05 (m, 2H), 7.03 – 6.96 (m, 3H), 3.51 – 3.41 (m, 1H), 3.30 – 3.19 (m, 2H), 2.94 – 2.86 (m, 4H), 2.48 – 2.41 (m, 2H), 2.38 – 2.32 (m, 6H), 2.31 – 2.30 (m, 2H), 2.284 – 2.278 (m, 3H), 2.25 – 2.24 (m, 2H), 2.21 – 2.19 (m, 2H), 2.17 – 2.16 (m, 2H), 2.14 – 2.12 (m, 2H), 2.06 – 2.01 (m, 6H), 1.96 – 1.94 (m, 1H), 1.89 – 1.84 (m, 4H), 1.66 – 1.59 (m, 2H), 1.40 (s, 3H), 1.08 (s, 3H), 0.87 (d, *J* = 6.6 Hz, 3H). **<sup>13</sup>C NMR (101 MHz, CDCl<sub>3</sub>)** δ 212.1, 209.2, 208.8, 178.7, 160.1, 156.4, 141.6, 139.5, 135.8, 135.1, 133.0, 130.5, 129.9, 129.2, 129.1, 129.0, 128.4, 127.9, 124.3, 115.4, 57.1, 51.9, 49.1, 47.0, 45.8, 45.7, 45.1, 42.9, 42.5, 40.4, 38.8(2C), 38.1, 36.6, 36.2, 35.7, 35.4, 33.4, 31.3, 30.4, 29.8, 27.8, 25.3, 22.1, 21.2, 21.1, 18.8, 12.0. **HRMS (ESI/TOF-Q)** m/z: [M+H]<sup>+</sup> Calculated for C<sub>52</sub>H<sub>62</sub>N<sub>2</sub>O<sub>6</sub>H<sup>+</sup> 811.4681; Found 811.4683.

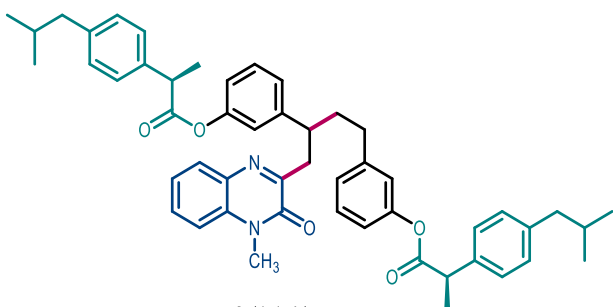

**5f**, (1:1 dr)  
from Ibuprofen

Compound, **5f**: Yellow liquid; eluent (15% ethyl acetate in hexane). **Yield**: 87% (135 mg); **<sup>1</sup>H NMR (500 MHz, CDCl<sub>3</sub>)** δ 7.85 – 7.74 (m, 1H), 7.53 – 7.47 (m, 1H), 7.32 – 7.28 (m, 6H), 7.25 – 7.21 (m, 2H), 7.18 – 7.13 (m, 6H), 6.99 – 6.91 (m, 2H), 6.85 – 6.75 (m, 2H), 3.95 – 3.88 (m, 2H), 3.63 (s, 3H), 3.52 – 3.46 (m, 1H), 3.27 – 3.24 (m, 2H), 2.49 – 2.46 (m, 6H), 2.11 – 1.92 (m, 2H), 1.91 – 1.84 (m, 2H), 1.62 – 1.58 (m, 6H), 0.93 – 0.91 (m, 12H). **<sup>13</sup>C NMR (126 MHz, CDCl<sub>3</sub>)** δ 173.3, 173.2, 159.8(C\*), 159.0, 155.0, 151.1, 151.0(C\*), 144.0,

143.8(C\*), 140.8, 137.5(C\*), 137.4, 133.1(C\*), 132.7, 129.9, 129.8, 129.61, 129.59, 129.3(C\*), 129.2, 129.1, 127.4(2C), 126.1, 125.9, 125.3, 123.7, 123.6, 121.7, 121.3, 121.1, 119.4(C\*), 119.3, 119.1, 118.8, 113.7, 113.6, 45.4, 45.2, 42.5, 42.4, 40.8, 40.7(C\*), 37.4, 35.7, 33.5, 32.3, 30.3, 29.1, 22.5(2C), 18.74, 18.71. **HRMS** (ESI/TOF-Q) m/z: [M+H]<sup>+</sup> Calculated for C<sub>51</sub>H<sub>56</sub>N<sub>2</sub>O<sub>5</sub>H<sup>+</sup> 777.4262; Found 777.4273. C\* is another diastereomer.

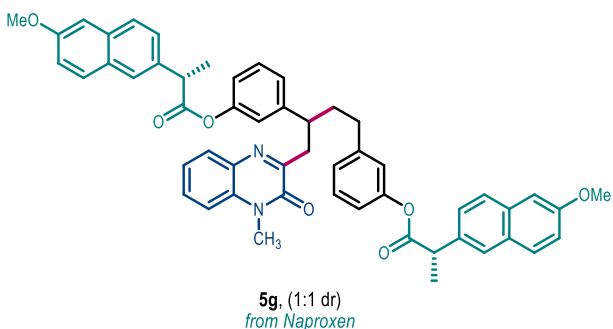

Compound, **5g**: Yellow liquid; eluent (30% ethyl acetate in hexane). **Yield**: 88% (145 mg); **<sup>1</sup>H NMR (400 MHz, CDCl<sub>3</sub>)** δ 7.88 – 7.84 (m, 1H), 7.83 – 7.67 (m, 6H), 7.55 – 7.46 (m, 4H), 7.36 – 7.28 (m, 4H), 7.24 – 7.10 (m, 8H), 6.83 – 6.79 (m, 1H), 4.58 – 4.54 (m, 1H), 4.40 – 4.31 (m, 1H), 4.10 – 4.05 (m, 1H), 3.92 (s, 6H), 3.61 (s, 3H), 2.35 – 2.23 (m, 2H), 2.08 – 2.01 (m, 2H), 1.72 – 1.62 (m, 2H), 0.91 – 0.87 (m, 6H). **<sup>13</sup>C NMR (126 MHz, CDCl<sub>3</sub>)** δ 173.2(2C), 161.0, 158.5, 157.8, 154.7, 150.9, 143.4, 142.70, 142.67, 135.4, 135.3, 133.92, 133.86, 133.1, 133.0, 132.9, 130.3, 129.9, 129.8, 129.6, 129.5(2C), 129.13, 129.08, 127.5, 126.41, 126.38, 126.35, 126.33, 126.27, 126.26, 123.8, 123.6, 121.5, 119.8, 119.7, 119.2, 113.8, 113.6, 105.8(2C), 55.5(2C), 48.9, 45.7, 29.8, 29.3, 27.3, 21.8, 18.7, 14.3, 12.5. **HRMS** (ESI/TOF-Q) m/z: [M+H]<sup>+</sup> Calculated for C<sub>53</sub>H<sub>48</sub>N<sub>2</sub>O<sub>7</sub>H<sup>+</sup> 825.3534; Found 825.3539.

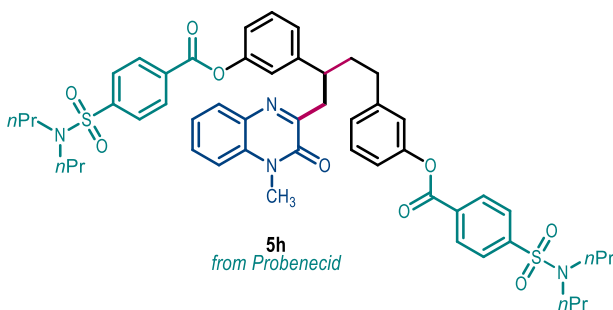

Compound, **5h**: Yellow liquid; eluent (15% ethyl acetate in hexane). **Yield**: 93% (174 mg); **<sup>1</sup>H NMR (400 MHz, CDCl<sub>3</sub>)** δ 7.77 – 7.73 (m, 1H), 7.51 – 7.47 (m, 1H), 7.31 – 7.27 (m, 6H), 7.24 – 7.20 (m, 2H), 7.16 – 7.12 (m, 6H), 6.96 – 6.90 (m, 2H), 6.82 – 6.73 (m, 2H), 3.93 – 3.87 (m, 2H), 3.63 (s, 3H), 3.50 – 3.47 (m, 1H), 3.25 – 3.23 (m, 2H), 2.49 – 2.46 (m, 6H), 2.10 – 1.92 (m, 2H), 1.91 – 1.82 (m, 2H), 1.61 – 1.56 (m, 8H), 0.93 – 0.91 (m, 12H). **<sup>13</sup>C NMR (126**



**MHz, CDCl<sub>3</sub>)**  $\delta$  173.3, 173.2, 159.0, 155.0, 151.0, 150.9, 146.3, 144.0, 140.9, 137.5, 137.4, 133.1, 132.7, 129.9, 129.8, 129.63, 129.61, 129.3, 129.1, 127.4(2C), 126.0, 125.4, 123.6, 121.4, 121.1, 119.39, 119.36, 118.8, 113.7, 45.4, 45.2, 42.5, 42.4(2C\*), 40.81, 40.76(2C\*), 37.4, 33.6, 30.3, 29.2, 22.6, 18.8, 18.7. **HRMS** (ESI/TOF-Q)  $m/z$ : [M+H]<sup>+</sup> Calculated for C<sub>51</sub>H<sub>58</sub>N<sub>4</sub>O<sub>9</sub>S<sub>2</sub>H<sup>+</sup> 935.3718; Found 935.3711.

### Crystallographic experimental data

**Crystallization:** Crystals of compound **3a** were obtained through a slow evaporation technique at room temperature from the solution in a hexane/DCM mixture.

Crystal structure of compound **3a** (CCDC number: 2385075, Ellipsoid Probability 50%):

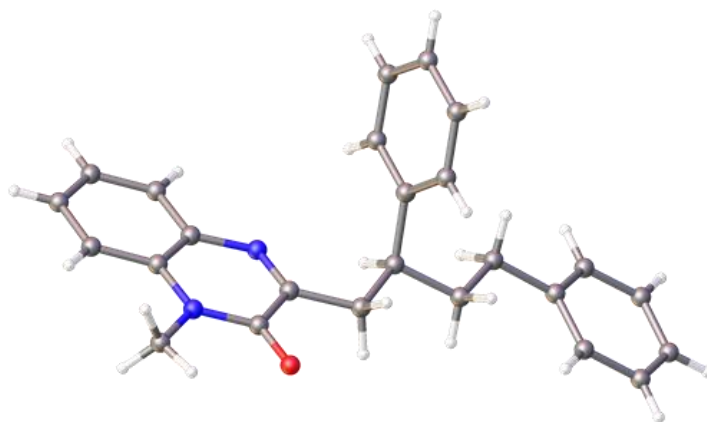

**Table 1.** Crystal data and structure refinement for **3a**

|                      |                                                  |                 |
|----------------------|--------------------------------------------------|-----------------|
| Identification code  | <b>3a</b>                                        |                 |
| Empirical formula    | C <sub>25</sub> H <sub>24</sub> N <sub>2</sub> O |                 |
| Formula weight       | 368.1889                                         |                 |
| Temperature          | 296(2) K                                         |                 |
| Wavelength           | 0.71073 Å                                        |                 |
| Crystal system       | Orthorhombic                                     |                 |
| Space group          | P b c a                                          |                 |
| Unit cell dimensions | a = 13.0274(8) Å                                 | $\alpha$ = 90°. |

|                                   |                                             |                       |
|-----------------------------------|---------------------------------------------|-----------------------|
|                                   | $b = 8.8918(5) \text{ \AA}$                 | $\beta = 90^\circ$ .  |
|                                   | $c = 19.8864(12) \text{ \AA}$               | $\gamma = 90^\circ$ . |
| Volume                            | 2303.6(2) $\text{\AA}^3$                    |                       |
| Z                                 | 8                                           |                       |
| Density (calculated)              | 1.218 Mg/m <sup>3</sup>                     |                       |
| Absorption coefficient            | 0.077 mm <sup>-1</sup>                      |                       |
| F(000)                            | 896                                         |                       |
| Crystal size                      | 0.319 x 0.234 x 0.083 mm <sup>3</sup>       |                       |
| Theta range for data collection   | 3.449 to 26.990°.                           |                       |
| Index ranges                      | -16<=h<=16, -11<=k<=11, -25<=l<=25          |                       |
| Reflections collected             | 70602                                       |                       |
| Independent reflections           | 2508 [R(int) = 0.0461]                      |                       |
| Completeness to theta = 25.242°   | 99.8 %                                      |                       |
| Absorption correction             | Semi-empirical from equivalents             |                       |
| Max. and min. transmission        | 0.986 and 0.953                             |                       |
| Refinement method                 | Full-matrix least-squares on F <sup>2</sup> |                       |
| Data / restraints / parameters    | 2508 / 0 / 149                              |                       |
| Goodness-of-fit on F <sup>2</sup> | 1.099                                       |                       |
| Final R indices [I>2sigma(I)]     | R1 = 0.0495, wR2 = 0.1287                   |                       |
| R indices (all data)              | R1 = 0.0636, wR2 = 0.1373                   |                       |
| Extinction coefficient            | n/a                                         |                       |
| Largest diff. peak and hole       | 0.354 and -0.287 e. $\text{\AA}^{-3}$       |                       |

## Gram scale synthesis of compound **3a** and **3x**

### Procedure for compound **3a**

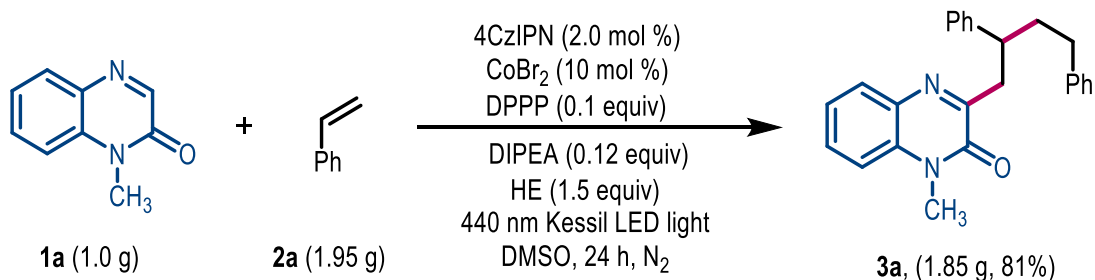

A 100 mL oven-dried round bottom flask equipped with a magnetic stir was charged with CoBr<sub>2</sub> (10 mol %), DPPP (0.1 equiv), 4CzIPN (2.0 mol %), Hantzsch ester (HE) (1.5 equiv), quinoxalinone **1a** (6.2 mmol, 1.0 equiv, 1.0 g), and alkene **2a** (18.7 mmol, 3.0 equiv, 1.95 g) under nitrogen atmosphere. The reaction flask was capped with a septum, and DIPEA (0.12 equiv) and dry DMSO (30 mL) were added via a syringe. After that, the reaction mixture was allowed to stir with irradiation of 440 nm Kessil LED light at room temperature for 24 h. After completion of the reaction (TLC monitored), brine solution was added and then extracted with ethyl acetate. The combined organic layers were dried with anhydrous Na<sub>2</sub>SO<sub>4</sub>, filtered, and concentrated under reduced pressure. The resulting residue was purified by column chromatography over silica gel to get product **3a** (1.85 g, 81% yield).

### Procedure for compound **3x**

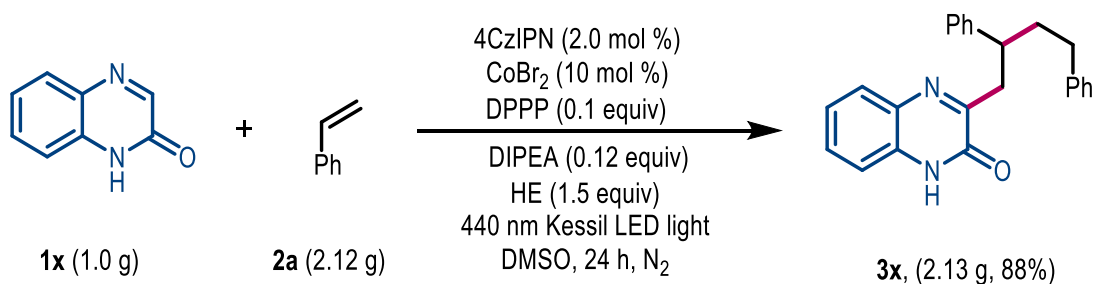

A 100 mL oven-dried round bottom flask equipped with a magnetic stir was charged with CoBr<sub>2</sub> (10 mol %), DPPP (0.1 equiv), 4CzIPN (2.0 mol %), Hantzsch ester (HE) (1.5 equiv), quinoxalinone **1x** (6.8 mmol, 1.0 equiv, 1.0 g), and alkene **2a** (20.5 mmol, 3.0 equiv, 2.12 g) under nitrogen atmosphere. The reaction flask was capped with a septum, and DIPEA (0.12 equiv) and dry DMSO (30 mL) were added via a syringe. After that, the reaction mixture was allowed to stir with irradiation of 440 nm Kessil LED light at room temperature for 24 h. After completion of the reaction (TLC monitored), brine solution was added and then extracted with ethyl acetate. The combined organic layers were dried with anhydrous Na<sub>2</sub>SO<sub>4</sub>, filtered, and concentrated under reduced pressure. The resulting residue was purified by column chromatography over silica gel to get product **3x** (2.13 g, 88% yield).

## Post-synthetic manipulations

### a) Synthesis of compound **6**

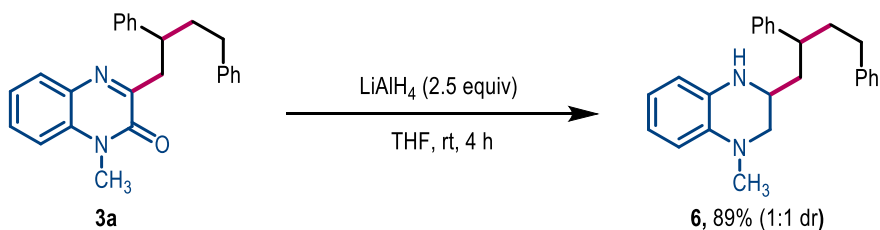

A 16×100 mm oven-dried reaction tube equipped with a magnetic stir was charged with C3-alkyl quinoxalin-2(1*H*)-one **3a** (0.1 mmol, 1.0 equiv), and LiAlH<sub>4</sub> (0.25 mmol, 2.5 equiv) under a nitrogen atmosphere. The reaction tube was capped with a septum, and dry THF (1.0 mL) was added via a syringe. After that, the reaction mixture was allowed to stir at room temperature under N<sub>2</sub> atmosphere for 4 h. After completion of the reaction (TLC monitored), the reaction mixture was neutralized with a saturated solution of sodium bicarbonate and then extracted with ethyl acetate. The combined organic layers were dried with anhydrous Na<sub>2</sub>SO<sub>4</sub>, filtered, and concentrated under reduced pressure. The resulting residue was purified by flash chromatography column over silica gel to get compound **6**.

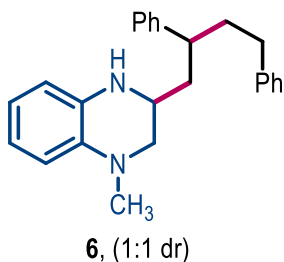

Compound, **6**: Yellow liquid; eluent (7% ethyl acetate in hexane). **Yield:** 89% (32 mg); **<sup>1</sup>H NMR (400 MHz, CDCl<sub>3</sub>)** δ 7.38 – 7.32 (m, 4H), 7.29 – 7.27 (m, 3H), 7.24 – 7.16 (m, 10H), 7.13 – 7.09 (m, 4H), 6.68 – 6.55 (m, 4H), 6.52 – 6.49 (m, 3H), 6.47 – 6.45 (m, 1H), 6.16 – 6.14 (m, 1H), 3.35 – 3.29 (m, 1H), 3.25 – 3.21 (m, 1H), 3.18 – 3.14 (m, 1H), 2.97 – 2.92 (m, 2H), 2.86 – 2.84 (m, 1H), 2.82 (s, 3H), 2.76 (s, 3H), 2.73 – 2.60 (m, 2H), 2.50 – 2.46 (m, 4H), 2.02 – 1.94 (m, 4H), 1.88 – 1.76 (m, 4H). **<sup>13</sup>C NMR (101 MHz, CDCl<sub>3</sub>)** δ 144.7, 144.4, 142.3, 142.2, 136.1, 135.9, 133.9, 133.9, 129.0, 128.9, 128.53(2C), 128.50, 128.47, 127.8(2C), 126.8, 126.7, 126.0, 125.9, 118.78, 118.75, 118.3, 118.2, 113.7, 113.6, 111.6, 111.5, 55.6, 55.5, 49.0, 48.1, 43.2, 42.1, 41.9, 41.7, 39.3, 39.3, 39.1, 38.9, 33.8, 33.6. **HRMS (ESI/TOF-Q)** m/z: [M+H]<sup>+</sup> Calculated for C<sub>25</sub>H<sub>28</sub>N<sub>2</sub>H<sup>+</sup> 356.2252; Found 356.2250.

## b) Synthesis of compound 7

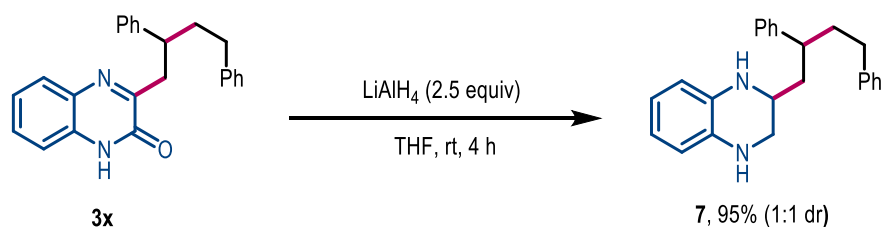

A 16×100 mm oven-dried reaction tube equipped with a magnetic stir was charged with compound **3x** (0.1 mmol, 1.0 equiv), and  $\text{LiAlH}_4$  (0.25 mmol, 2.5 equiv) under a nitrogen atmosphere. The reaction tube was capped with a septum, and dry THF (1.0 mL) was added via a syringe. After that, the reaction mixture was allowed to stir at room temperature under  $\text{N}_2$  atmosphere for 4 h. After completion of the reaction (TLC monitored), the reaction mixture was neutralized with a saturated solution of sodium bicarbonate and then extracted with ethyl acetate. The combined organic layers were dried with anhydrous  $\text{Na}_2\text{SO}_4$ , filtered, and concentrated under reduced pressure. The resulting organic residue was purified by flash chromatography column over silica gel to get compound **7**.

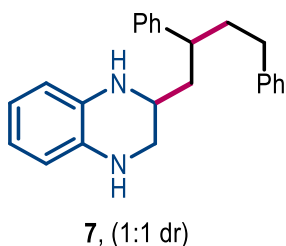

Compound, **7**: Yellow liquid; eluent (10% ethyl acetate in hexane). **Yield**: 95% (33 mg);  **$^1\text{H NMR}$  (500 MHz,  $\text{CDCl}_3$ )**  $\delta$  7.28 – 7.24 (m, 4H), 7.20 – 7.17 (m, 8H), 7.15 – 7.11 (m, 6H), 7.10 – 7.07 (m, 2H), 7.03 – 7.00 (m, 4H), 6.51 – 6.46 (m, 2H), 6.45 – 6.42 (m, 2H), 6.403 – 6.398 (m, 1H), 6.39 – 6.37 (m, 1H), 6.36 – 6.34 (m, 1H), 6.10 – 6.09 (m, 1H), 3.25 – 3.22 (m, 1H), 3.14 – 3.09 (m, 1H), 3.05 – 3.01 (m, 2H), 2.98 – 2.95 (m, 1H), 2.89 – 2.86 (m, 1H), 2.70 – 2.64 (m, 1H), 2.62 – 2.56 (m, 1H), 2.41 – 2.38 (m, 4H), 1.94 – 1.87 (m, 4H), 1.81 – 1.75 (m, 2H), 1.73 – 1.67 (m, 2H).  **$^{13}\text{C NMR}$  (126 MHz,  $\text{CDCl}_3$ )**  $\delta$  144.6, 144.4, 142.3, 142.2, 133.4, 133.3, 133.3, 133.2, 128.94, 128.88, 128.5(2C), 128.48, 128.45, 127.8, 127.8, 126.8, 126.7, 125.93, 125.89, 118.9, 118.73(2C), 118.70, 114.8, 114.7, 114.6, 114.4, 48.9, 48.1, 47.0, 46.7, 43.1, 42.1, 41.6, 41.3, 39.3, 39.0, 33.8, 33.6. **HRMS** (ESI/TOF-Q)  $m/z$ :  $[\text{M}+\text{H}]^+$  Calculated for  $\text{C}_{24}\text{H}_{26}\text{N}_2\text{H}^+$  342.2096; Found 342.2098.

## Mechanistic studies

### a) Radical quenching experiments

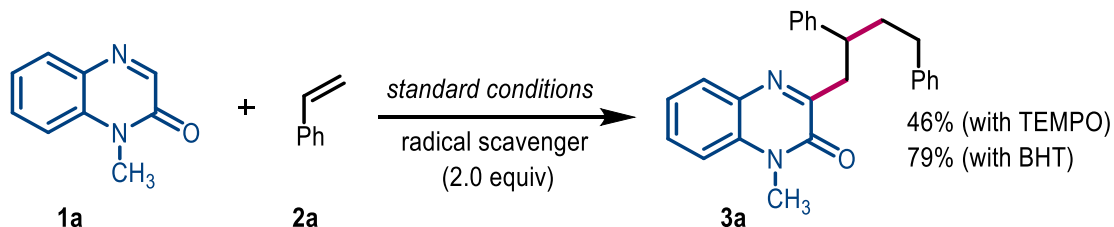

A 16×100 mm oven-dried reaction tube equipped with a magnetic stir was charged with CoBr<sub>2</sub> (10 mol %), DPPP (0.1 equiv), 4CzIPN (2.0 mol %), Hantzsch ester (HE) (1.5 equiv), quinoxalinone **1a** (0.2 mmol, 1.0 equiv), alkene **2a** (0.6 mmol, 3.0 equiv), and TEMPO or BHT (2.0 equiv, as a radical scavenger) under a nitrogen atmosphere. The reaction tube was capped with a septum, and DIPEA (0.12 equiv) and dry DMSO (1.5 mL) were added via a syringe. After that, the reaction mixture was allowed to stir with irradiation of 440 nm Kessil LED light at room temperature for 24 h. After the reaction, product **3a** was isolated following the steps described in the general procedure. For TEMPO as a radical scavenger, **3a** was obtained in 46% yield and with BHT as a radical scavenger, **3a** was obtained in 79% yield.

### b) Detection of reductive products

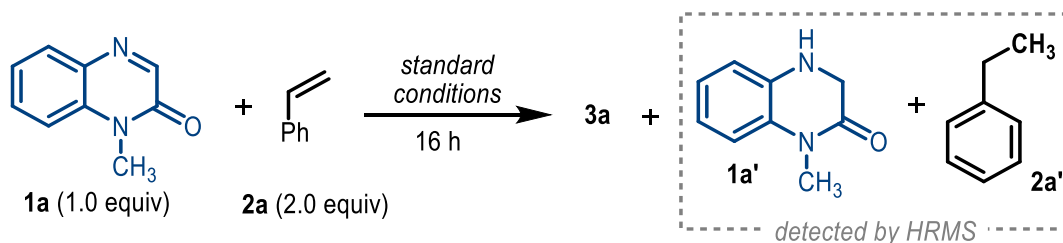

A 16×100 mm oven-dried reaction tube equipped with a magnetic stir was charged with CoBr<sub>2</sub> (10 mol %), DPPP (0.1 equiv), 4CzIPN (2.0 mol %), Hantzsch ester (HE) (1.5 equiv), quinoxalinone **1a** (0.2 mmol, 1.0 equiv), and styrene **2a** (0.6 mmol, 3.0 equiv) under nitrogen atmosphere. The reaction tube was capped with a septum, and DIPEA (0.12 equiv) and dry DMSO (1.5 mL) were added via a syringe. After that, the reaction mixture was allowed to stir with irradiation of 440 nm Kessil LED light at room temperature for 16 h. The imine and styrene reduced products **1a'** and **2a'** respectively were detected by HRMS.

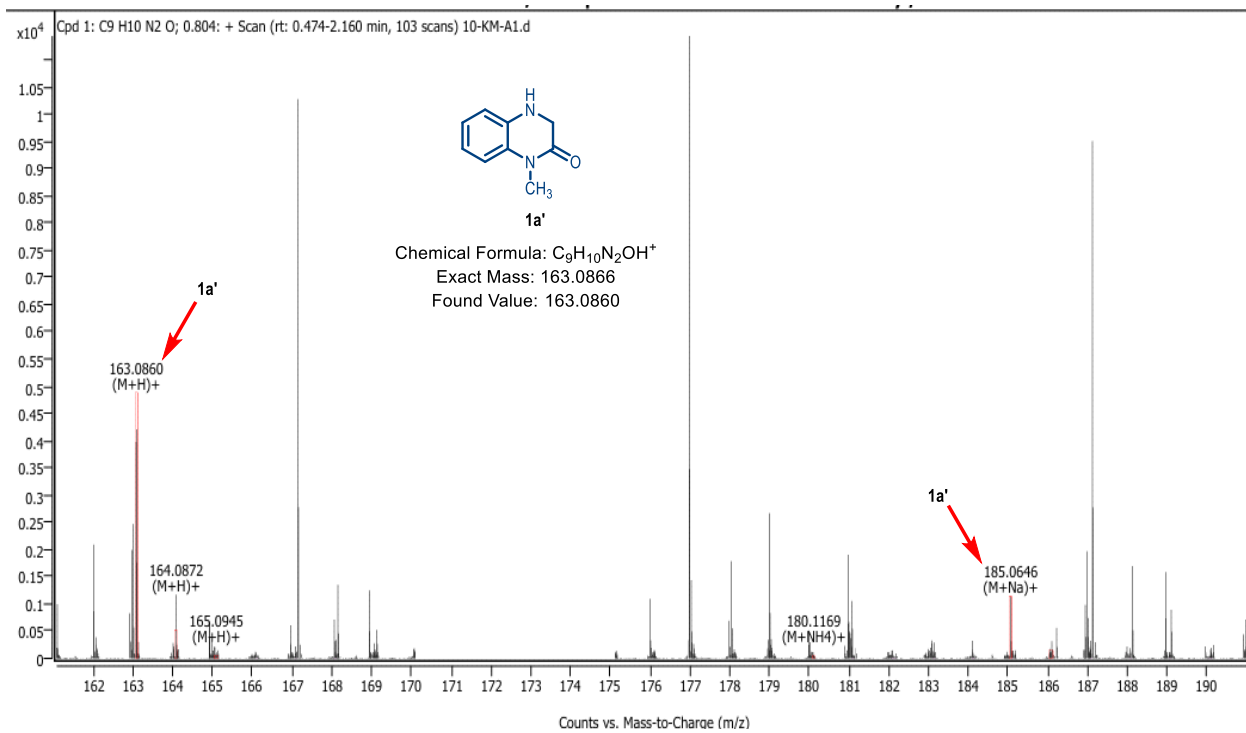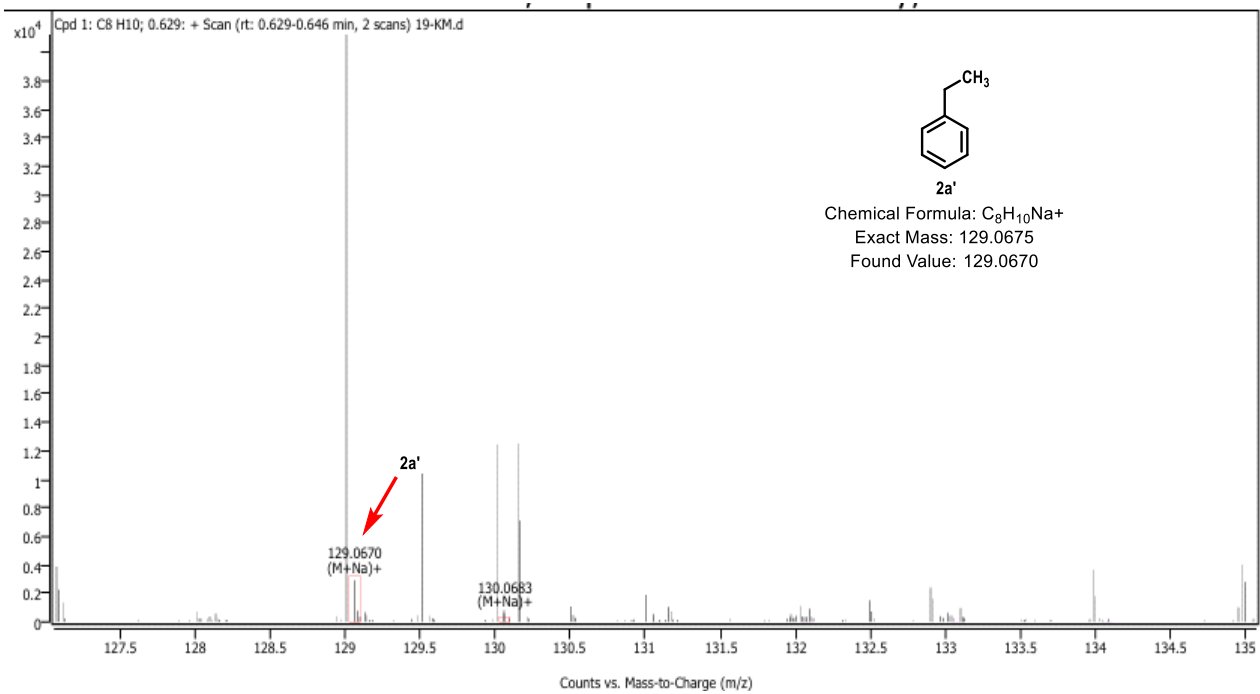

### c) Stern-Volmer fluorescence quenching experiments

Stern-Vollmer fluorescence quenching studies were carried out using a  $1 \times 10^{-4}$  M solution of 4CzIPN in DMSO and variable concentrations of **1a** (0.01M), **2a** (0.01M), CoBr<sub>2</sub> (0.005 M), DPPP (0.005 M), HE (0.01M) and DIPEA (0.01M). (1) To a quartz cuvette containing 4CzIPN ( $1 \times 10^{-4}$  M) in DMSO and variable concentration of HE was added as a quencher and the emission spectra were recorded. (2) To a quartz cuvette containing 4CzIPN ( $1 \times 10^{-4}$  M) in DMSO and variable concentration of DIPEA was added as a quencher and the emission spectra were recorded. (3) To a quartz cuvette containing 4CzIPN ( $1 \times 10^{-4}$  M) in DMSO and variable concentration of Sub **1a** was added as a quencher and the emission spectra were recorded. (4) To a quartz cuvette containing 4CzIPN ( $1 \times 10^{-4}$  M) in DMSO and variable concentration of Sub **2a** was added as a quencher and the emission spectra were recorded. (5) To a quartz cuvette containing 4CzIPN ( $1 \times 10^{-4}$  M) in DMSO and variable concentration of (CoBr<sub>2</sub> + DPPP) was added as a quencher and the emission spectra were recorded. (6) To a quartz cuvette containing 4CzIPN ( $1 \times 10^{-4}$  M) in DMSO and variable concentration of (HE + DIPEA) was added as a quencher and the emission spectra were recorded. (7) To a quartz cuvette containing HE (0.01 M) in DMSO and variable concentration of DIPEA was added as a quencher and the emission spectra were recorded. Conclusion: HE quenches 4CzIPN more than the other three cases, while other components such as quinoxalinone **1a** and alkene **2a** may not react with 4CzIPN.

#### 1) Stern-Volmer quenching experiment with 4CzIPN and HE as quencher

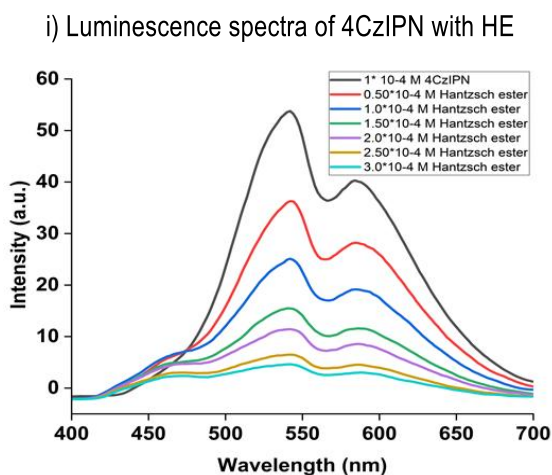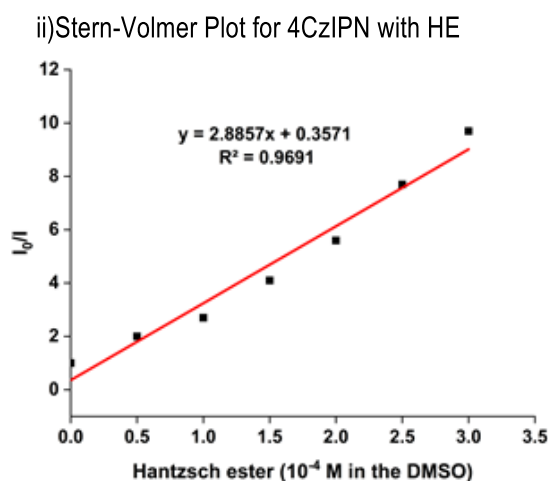



## 2) Stern-Volmer quenching experiment with 4CzIPN and DIPEA as quencher

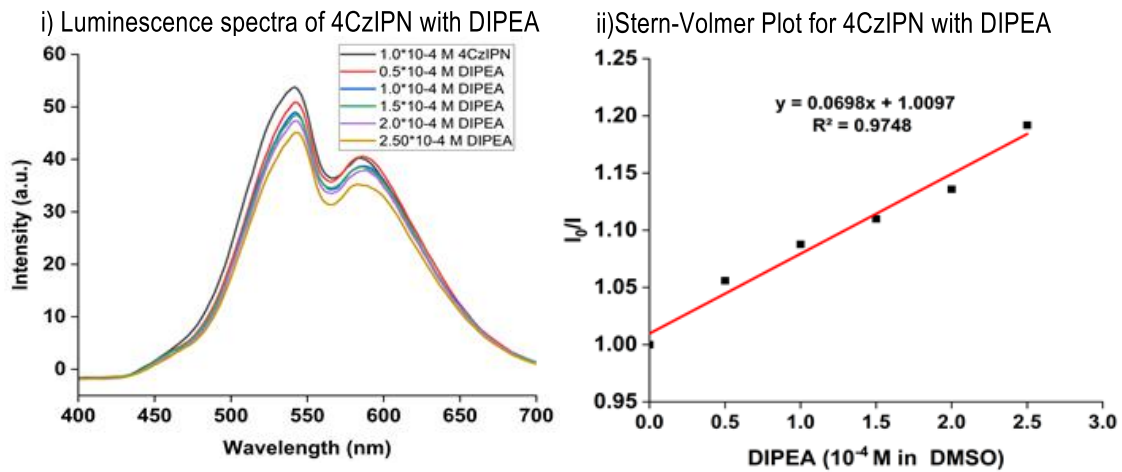

## 3) Stern-Volmer quenching experiment with 4CzIPN and Sub 1a as quencher

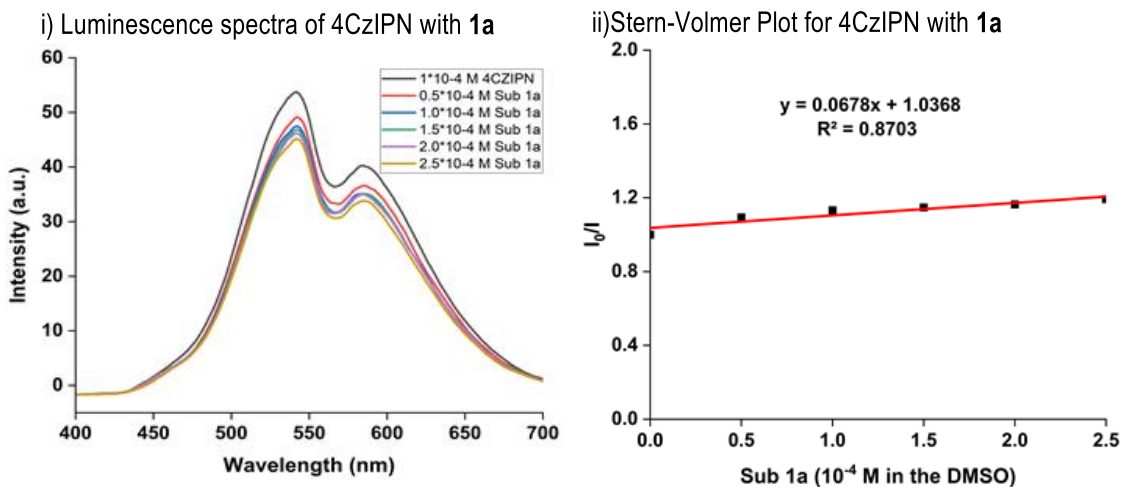

## 4) Stern-Volmer quenching experiment with 4CzIPN and Sub 2a as quencher

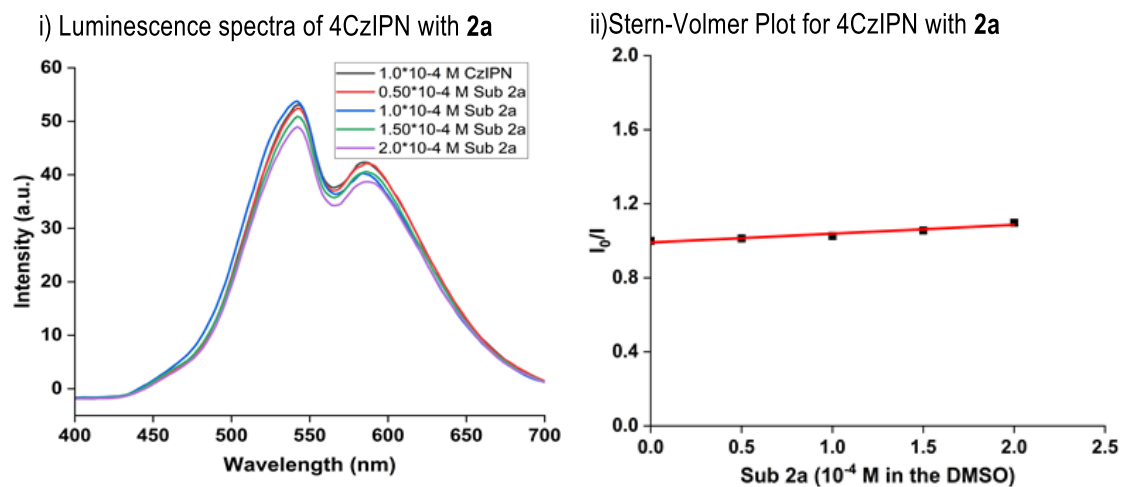

### 5) Stern-Volmer quenching experiment with 4CzIPN and CoBr<sub>2</sub>+DPPP as quencher

i) Luminescence spectra of 4CzIPN with (CoBr<sub>2</sub>+DPPP) ii) Stern-Volmer Plot for 4CzIPN with (CoBr<sub>2</sub>+DPPP)

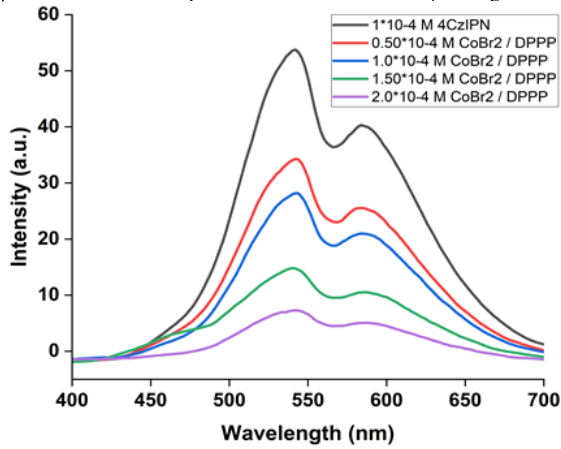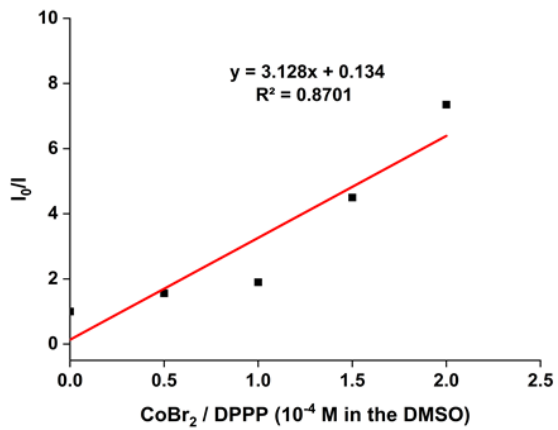

### 6) Stern-Volmer quenching experiment with 4CzIPN and (HE+DIPEA) as quencher

i) Luminescence spectra of 4CzIPN with (HE+DIPEA) ii) Stern-Volmer Plot for 4CzIPN with (HE+DIPEA)

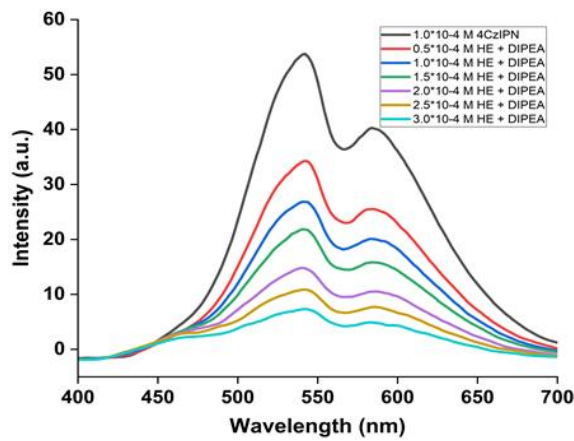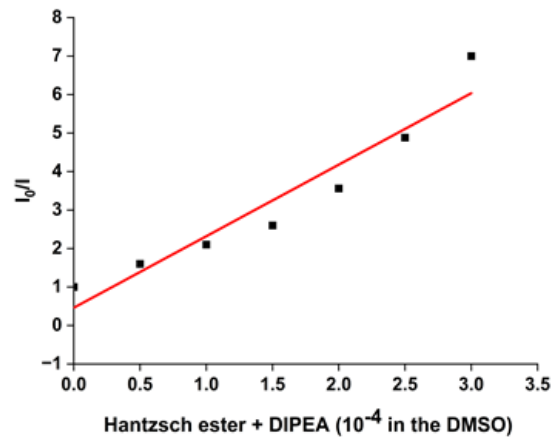

### 7) Stern-Volmer quenching experiment with HE and DIPEA as quencher

i) Luminescence spectra of HE with DIPEA

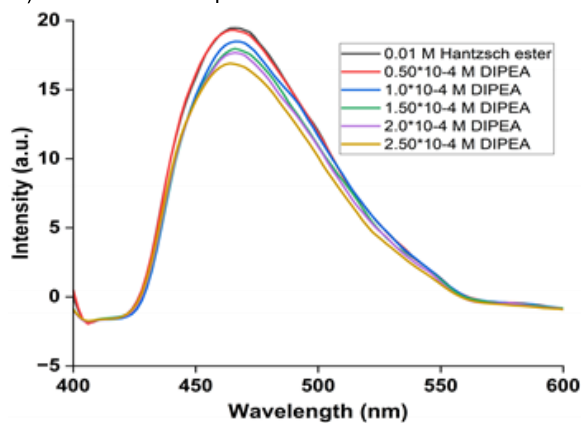

ii) Stern-Volmer Plot for HE with DIPEA

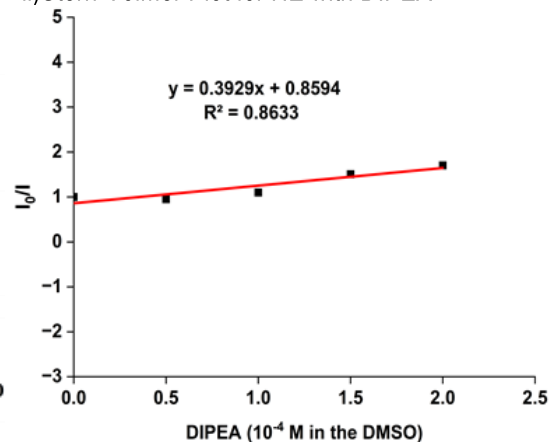

# $^1\text{H}$ , $^{13}\text{C}$ and $^{19}\text{F}$ NMR spectra of synthesized compounds

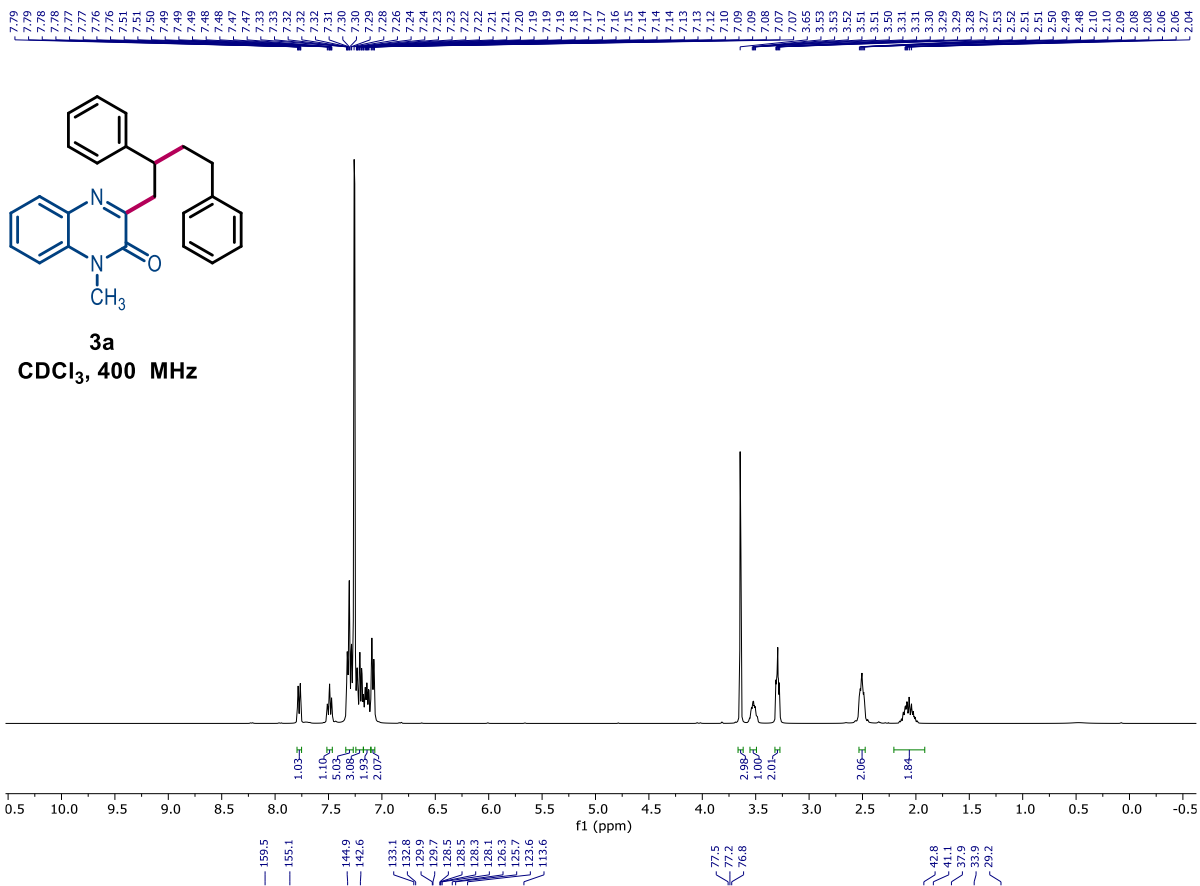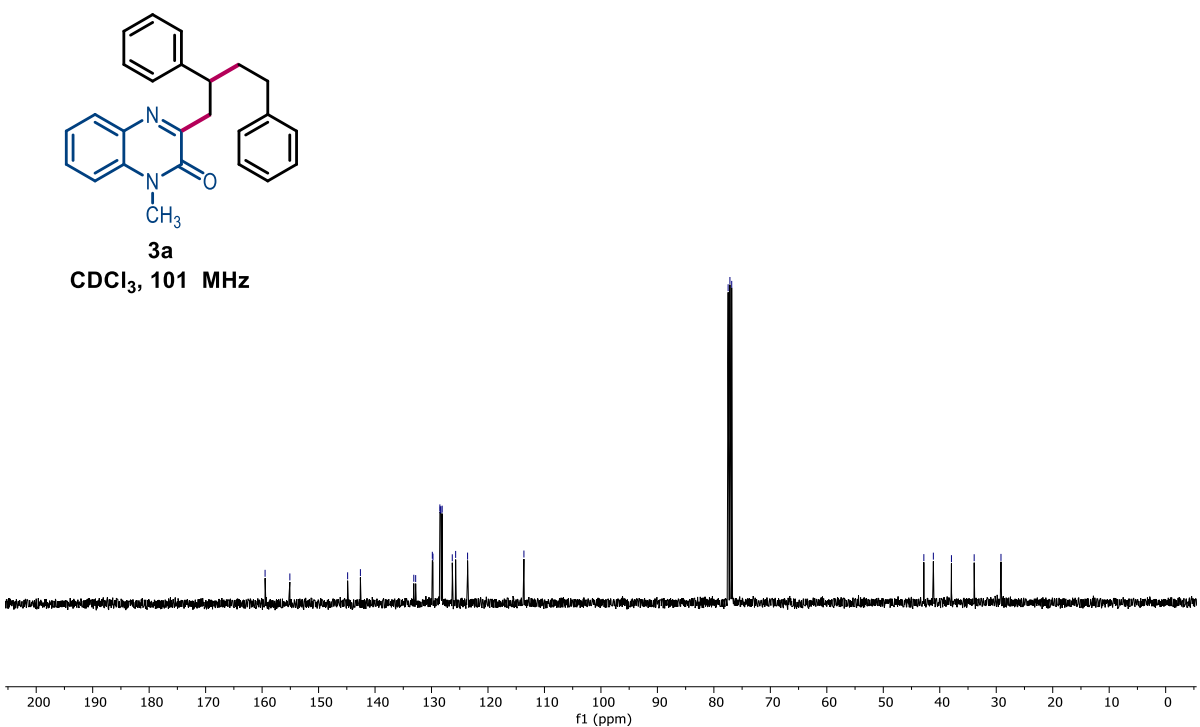

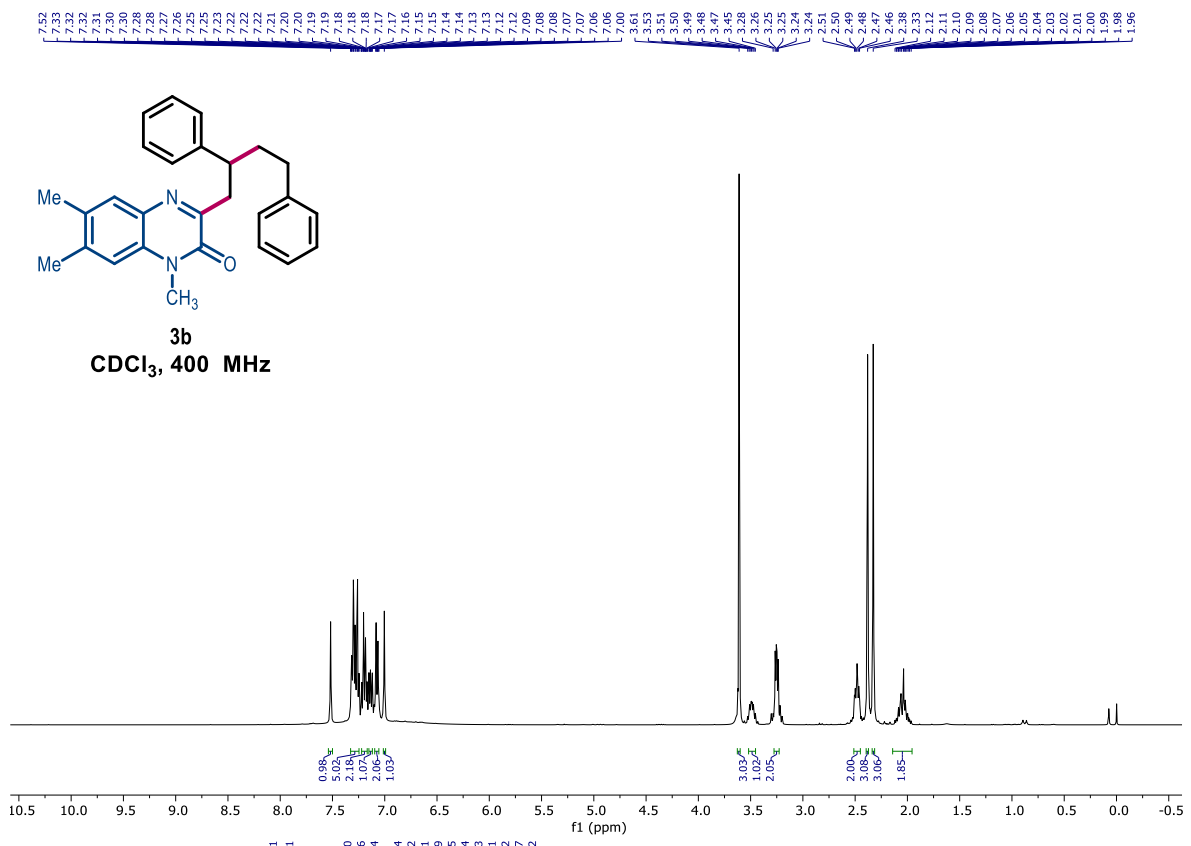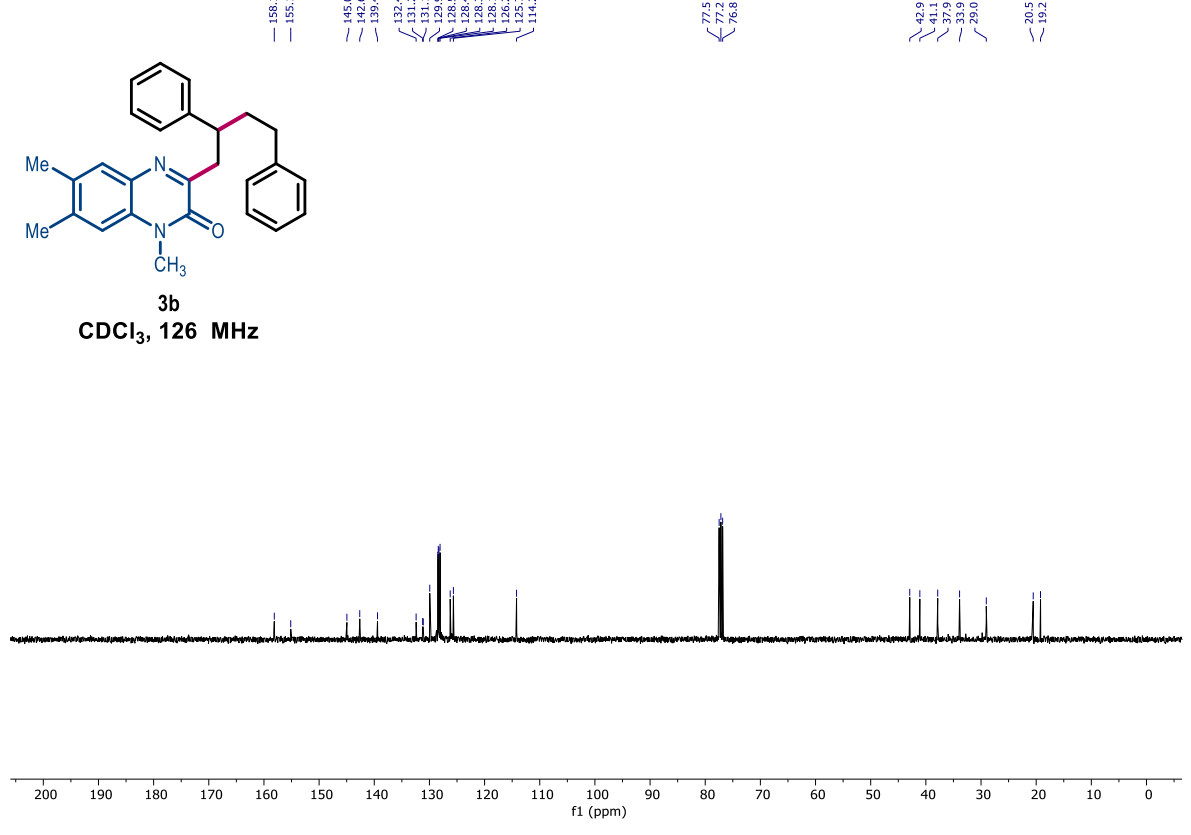

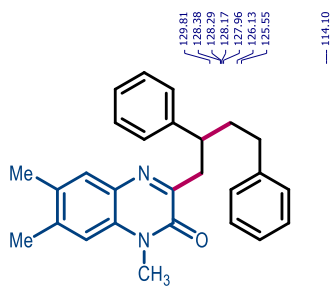

**3b**  
CDCl<sub>3</sub>, 126 MHz

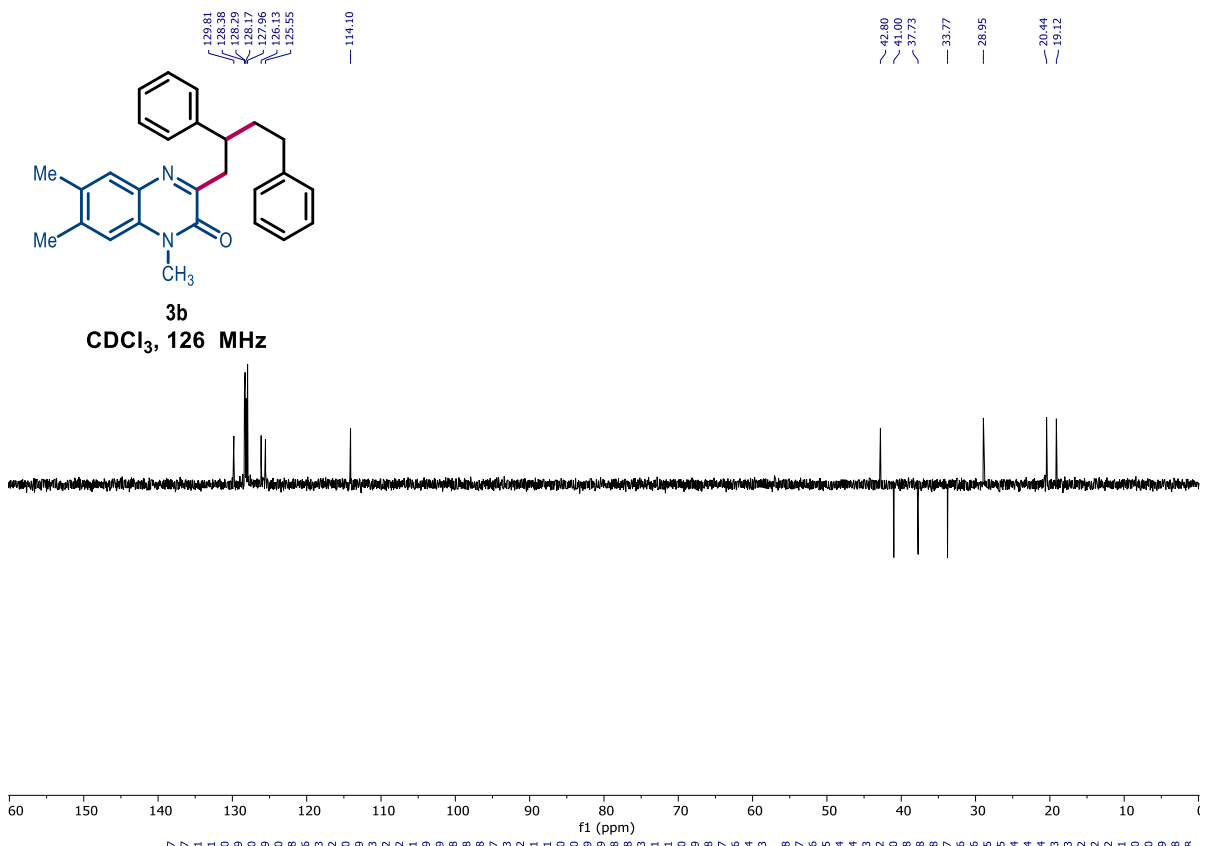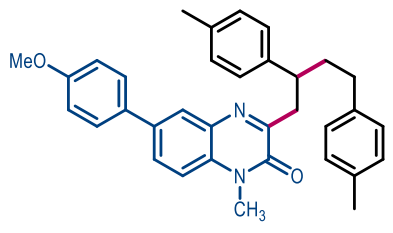

**3c**  
CDCl<sub>3</sub>, 500 MHz

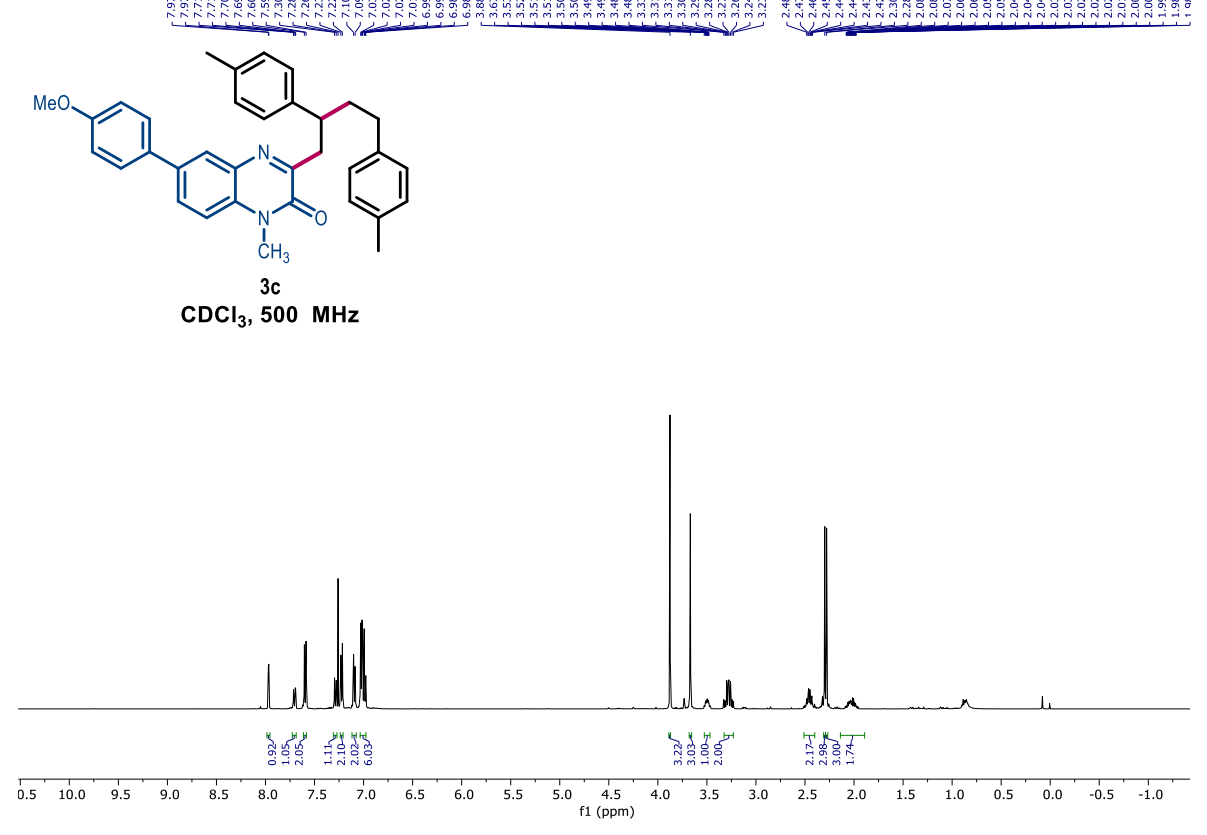

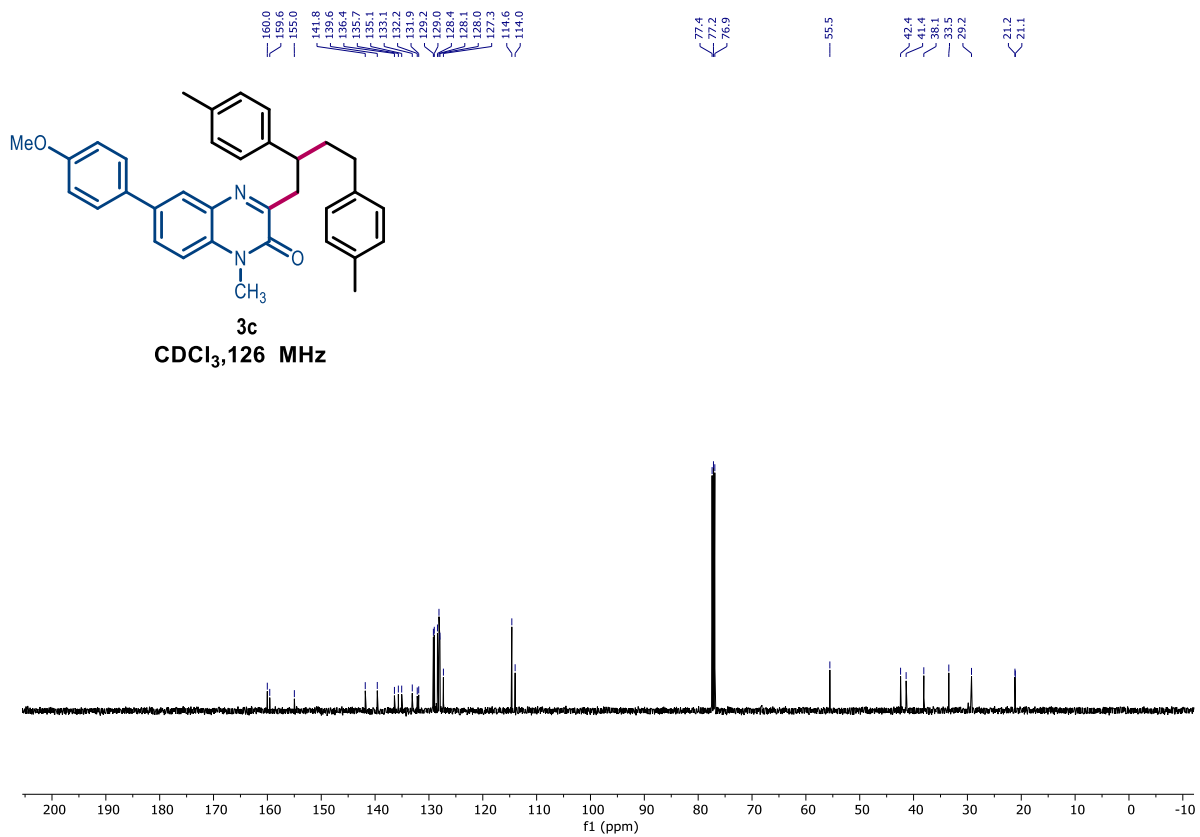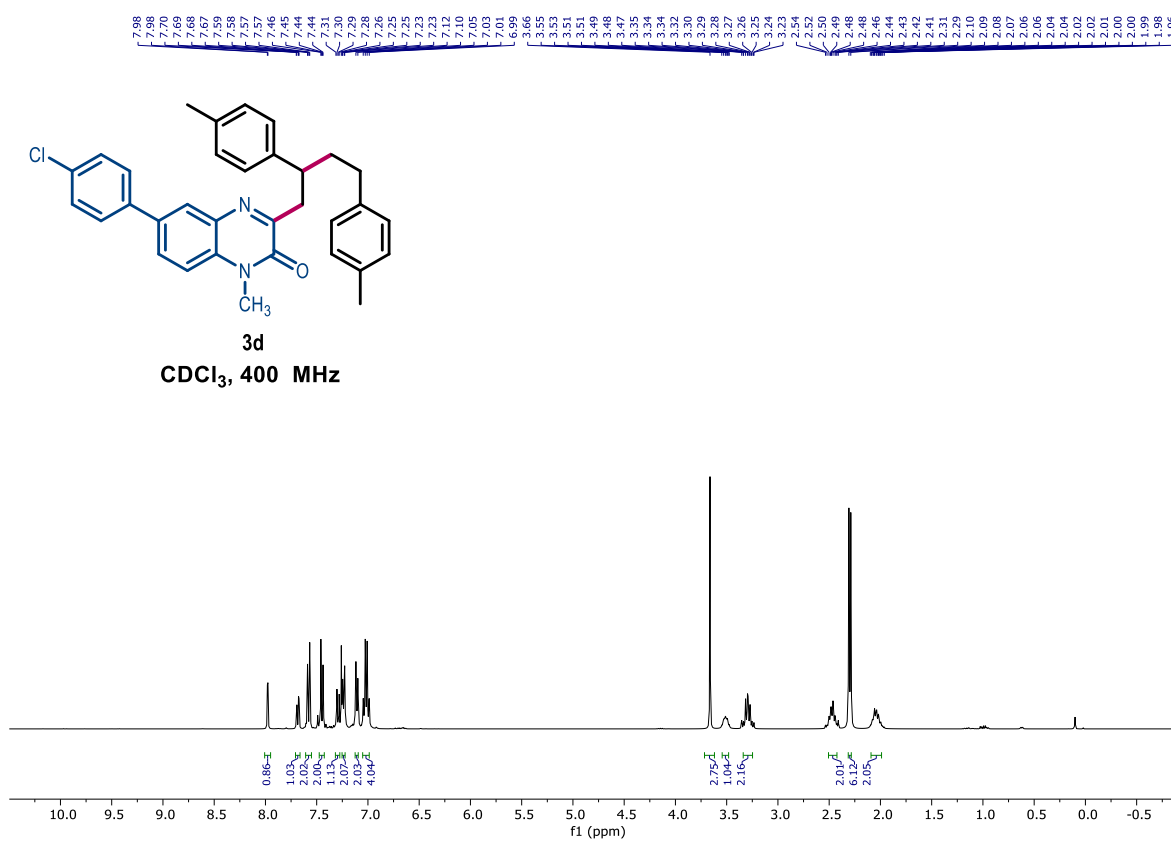

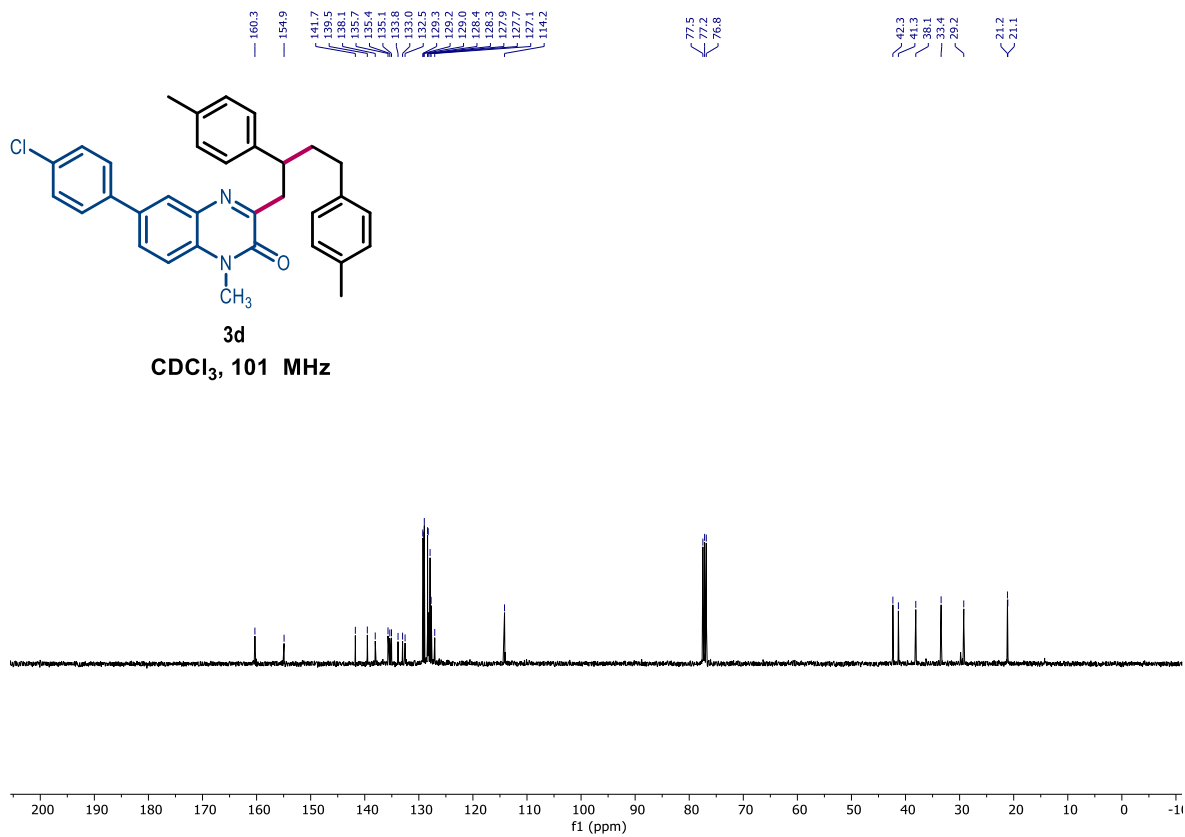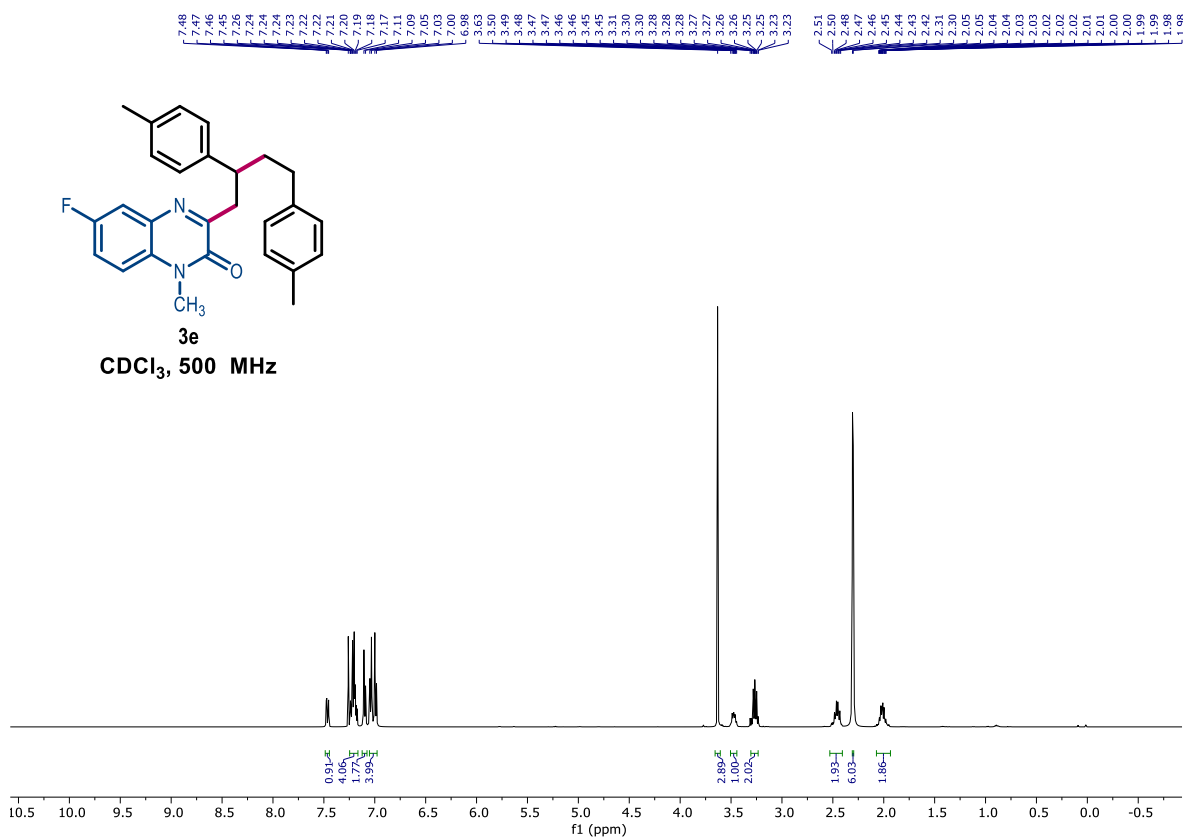

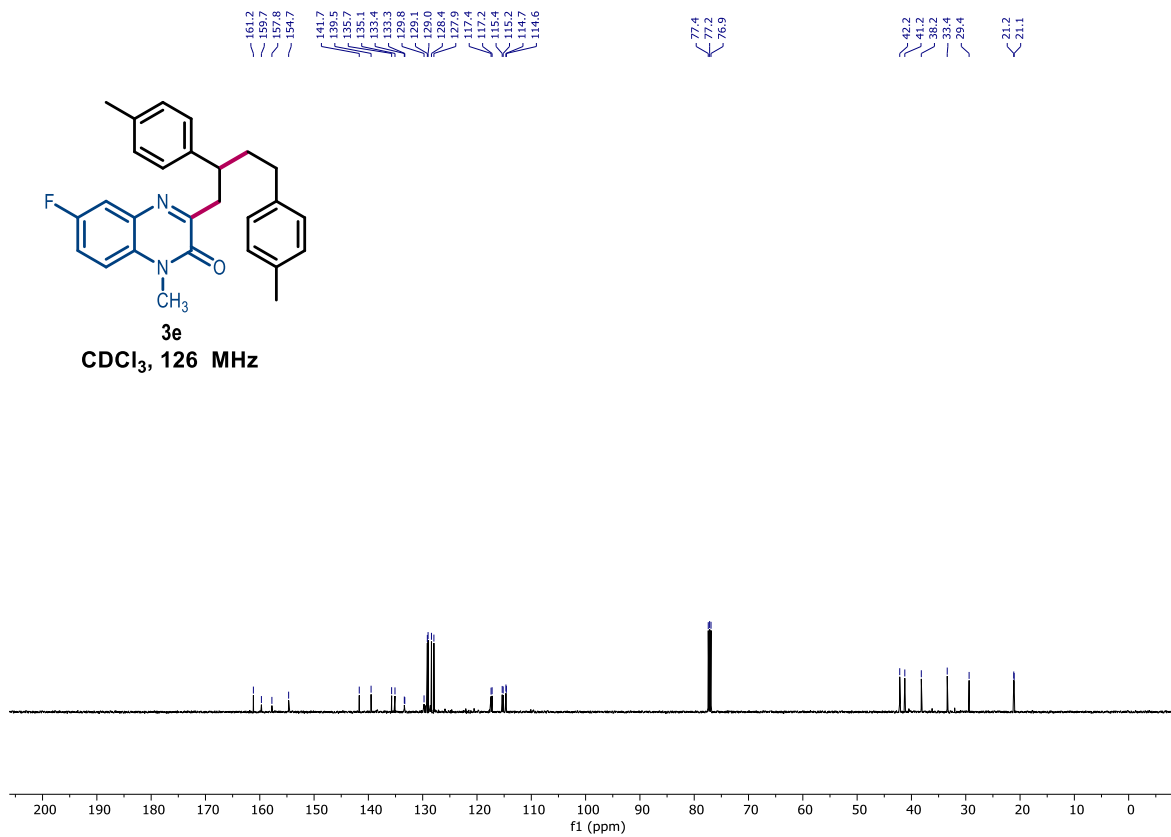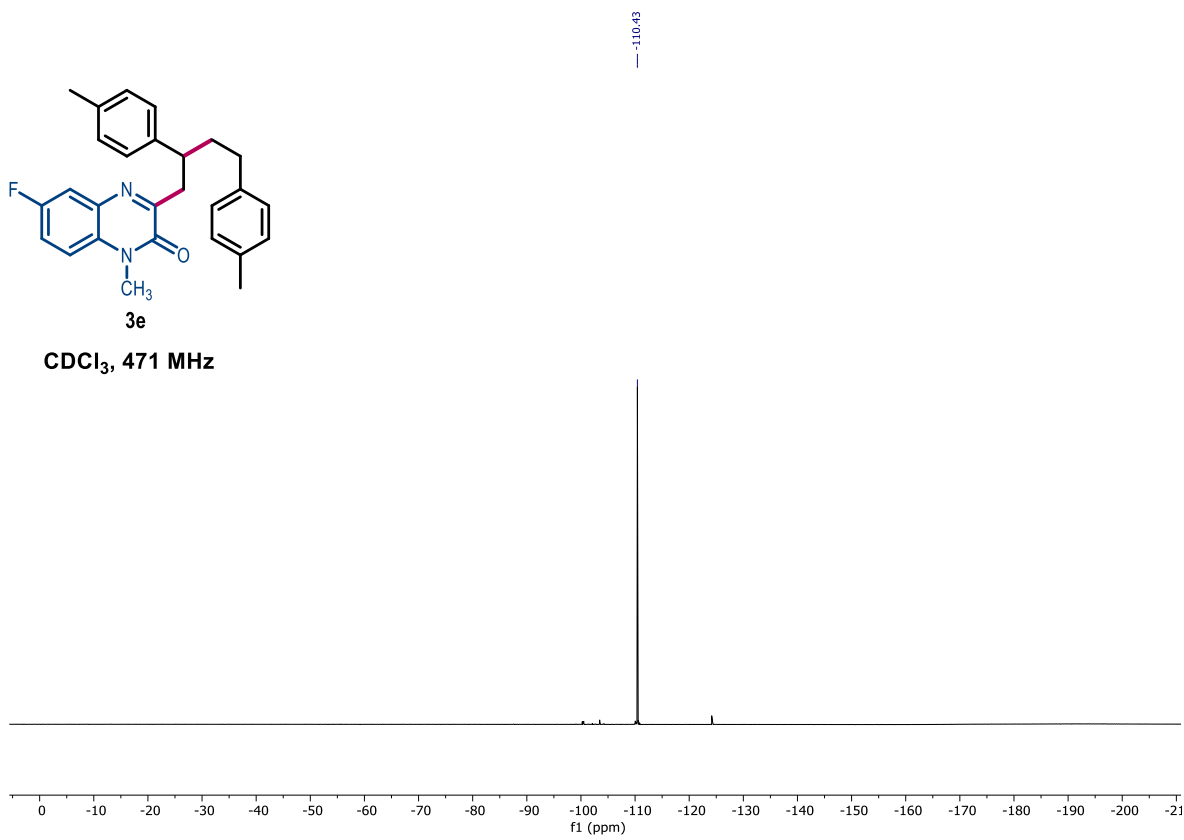



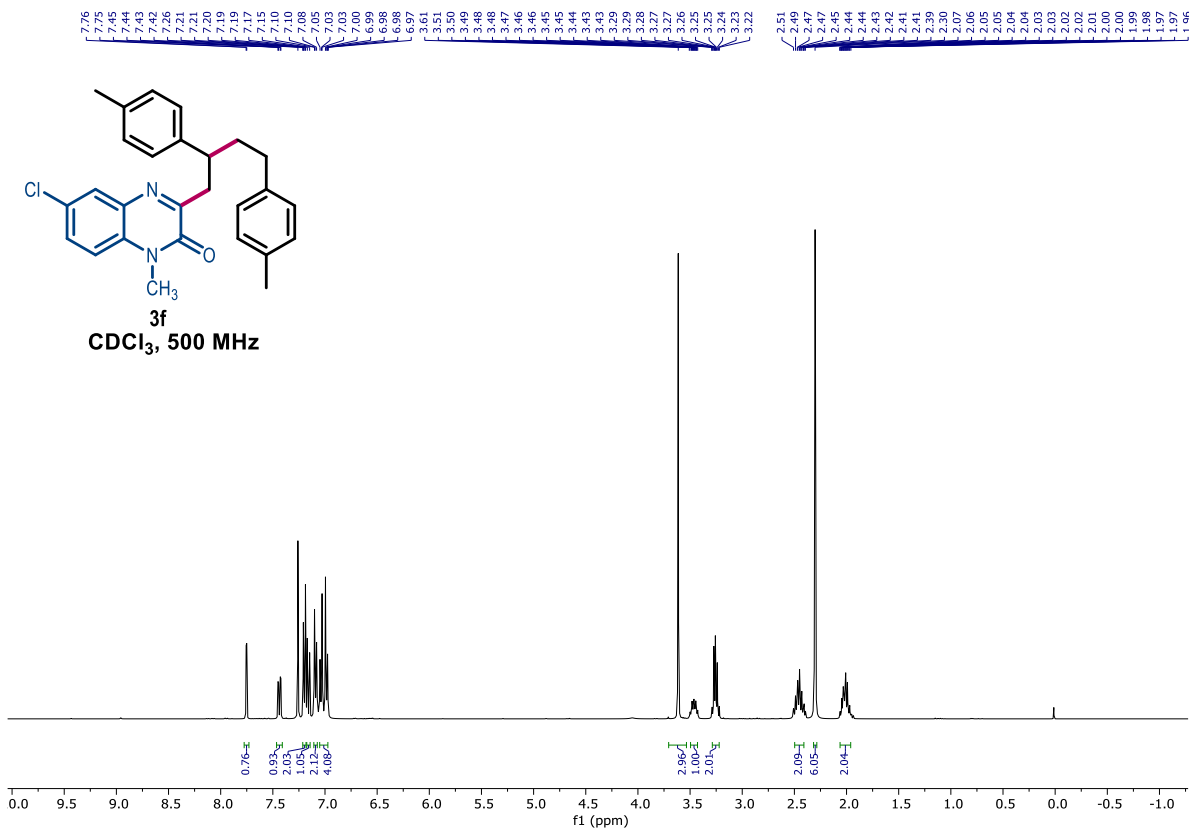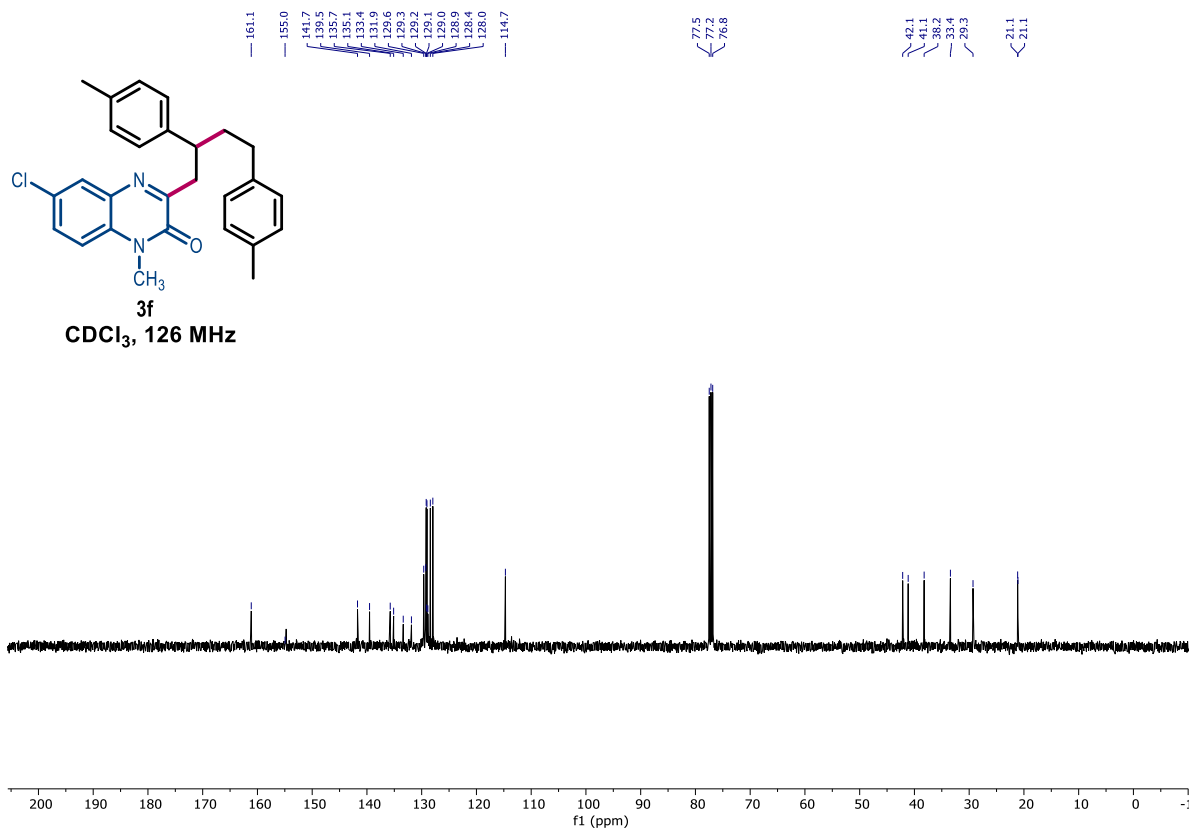

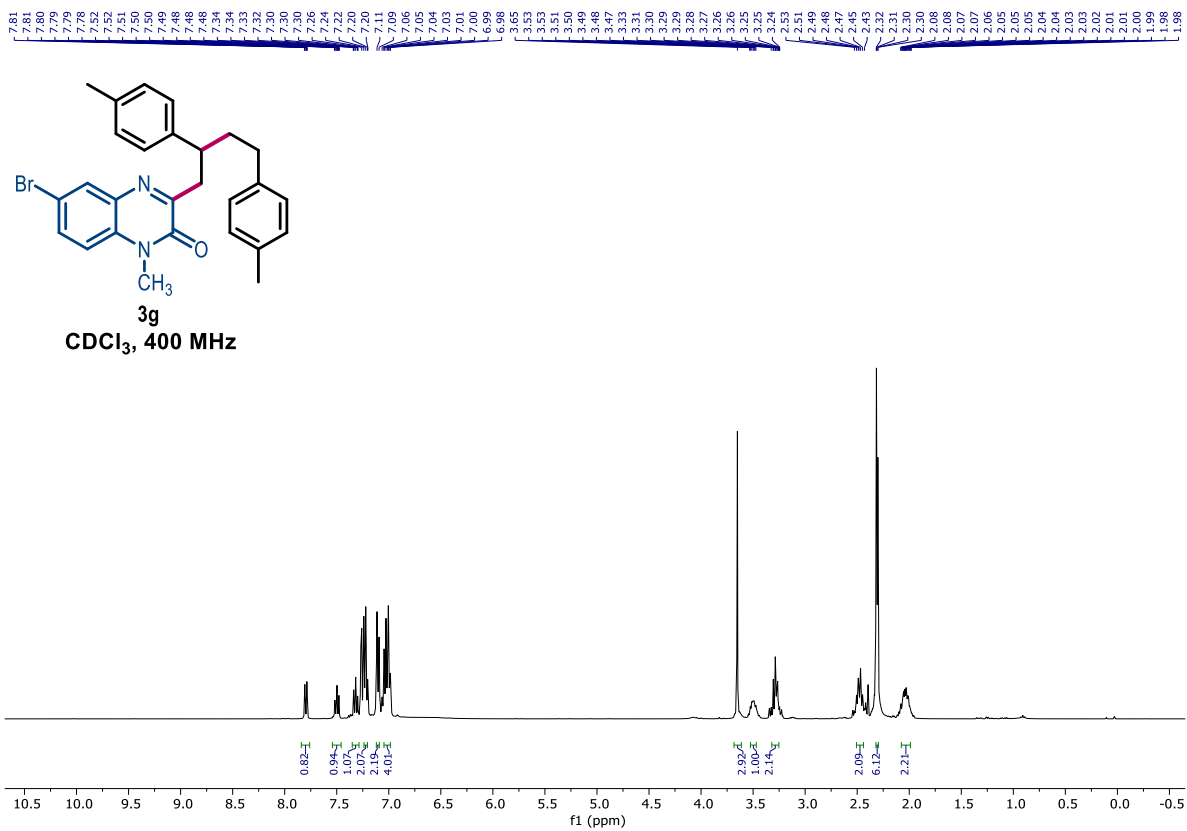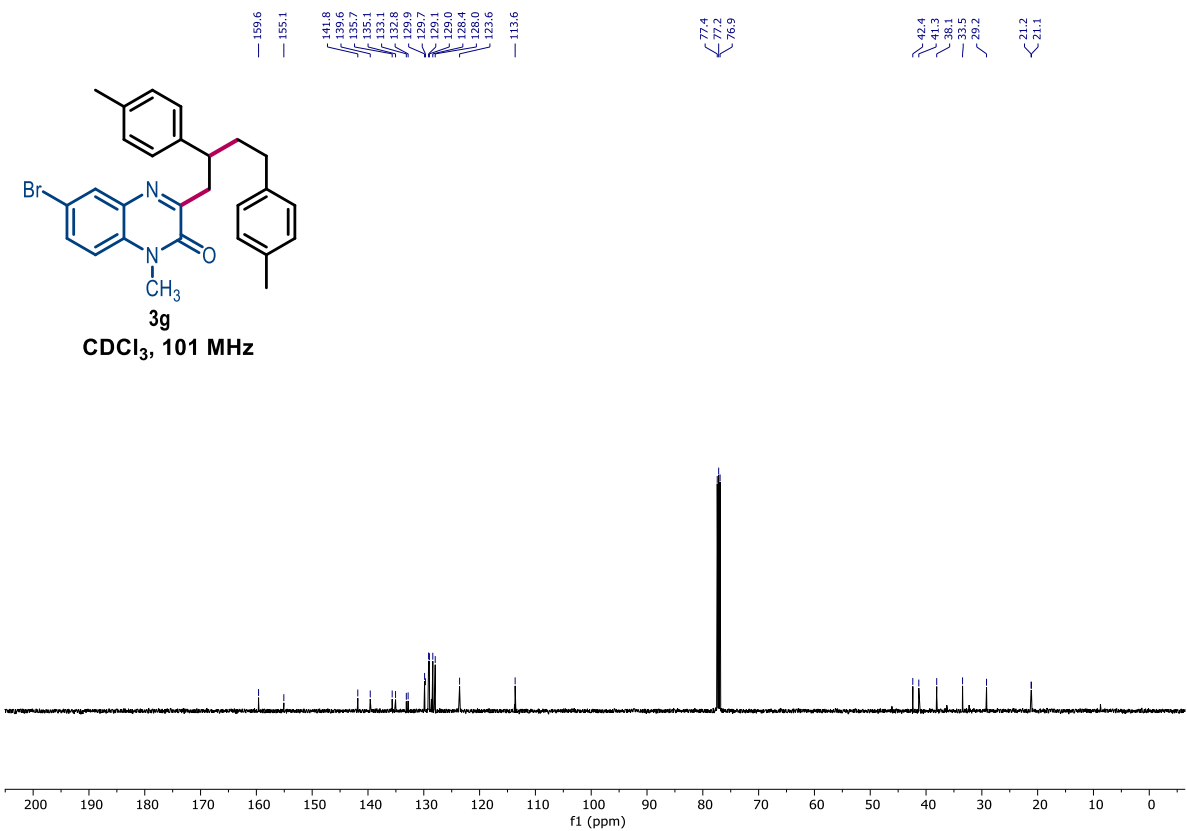

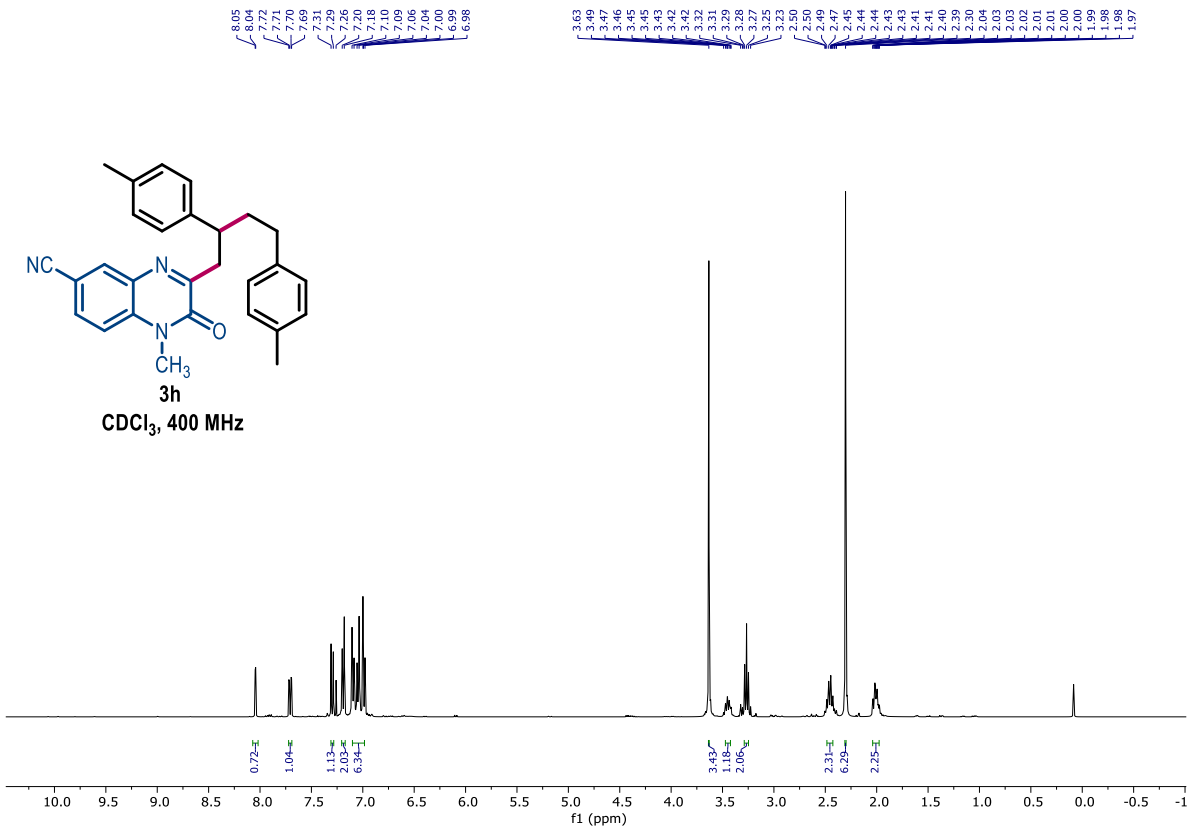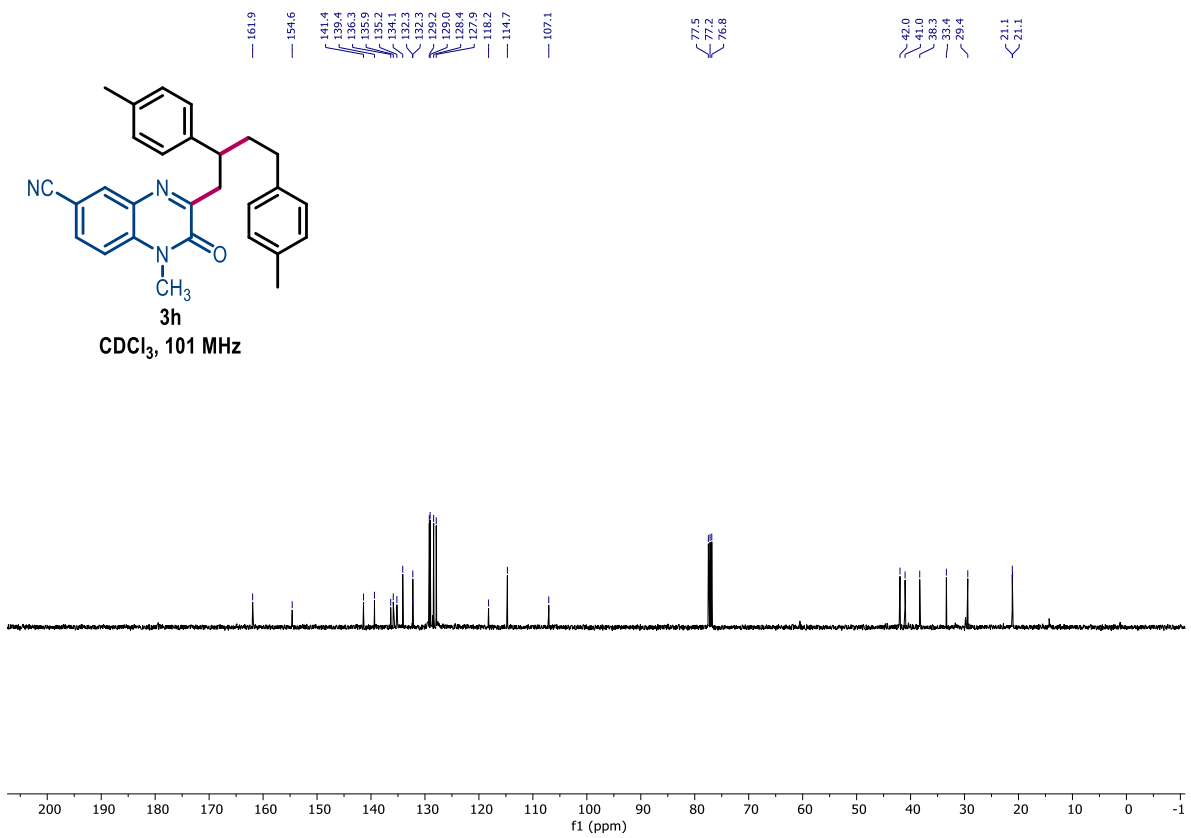

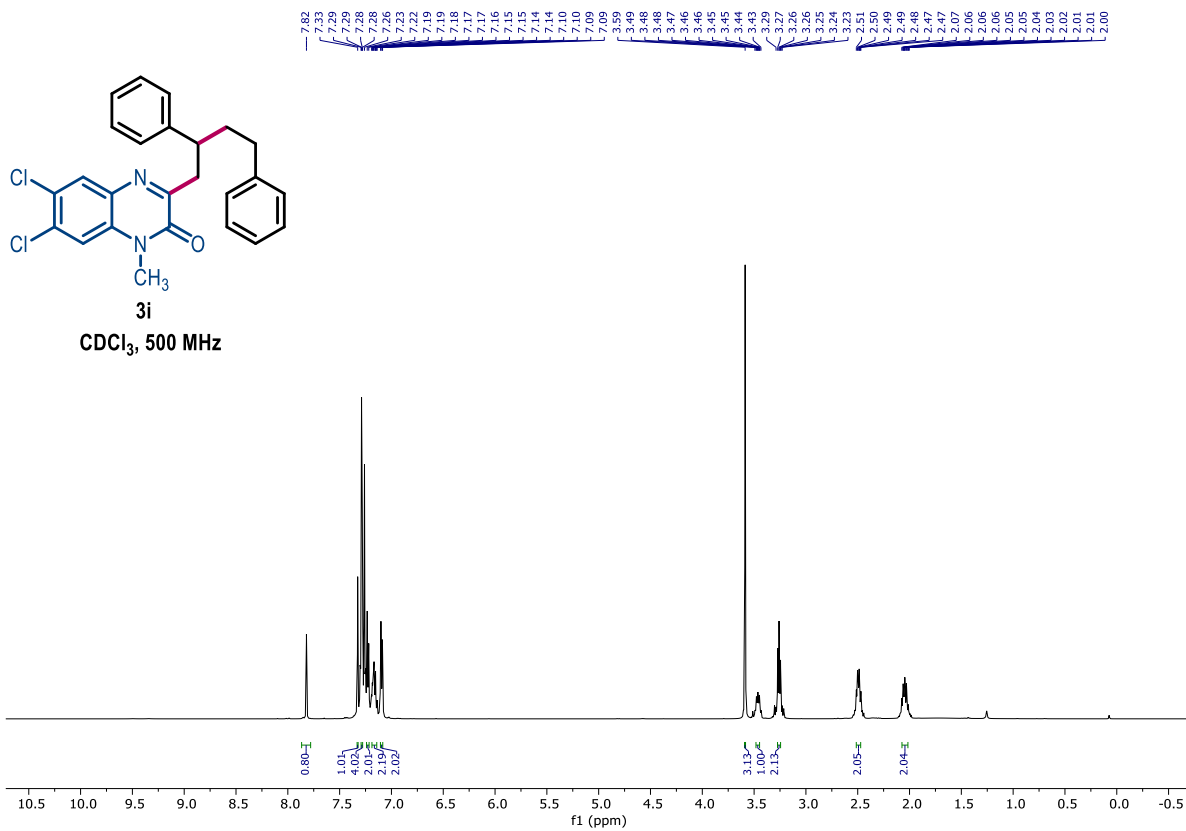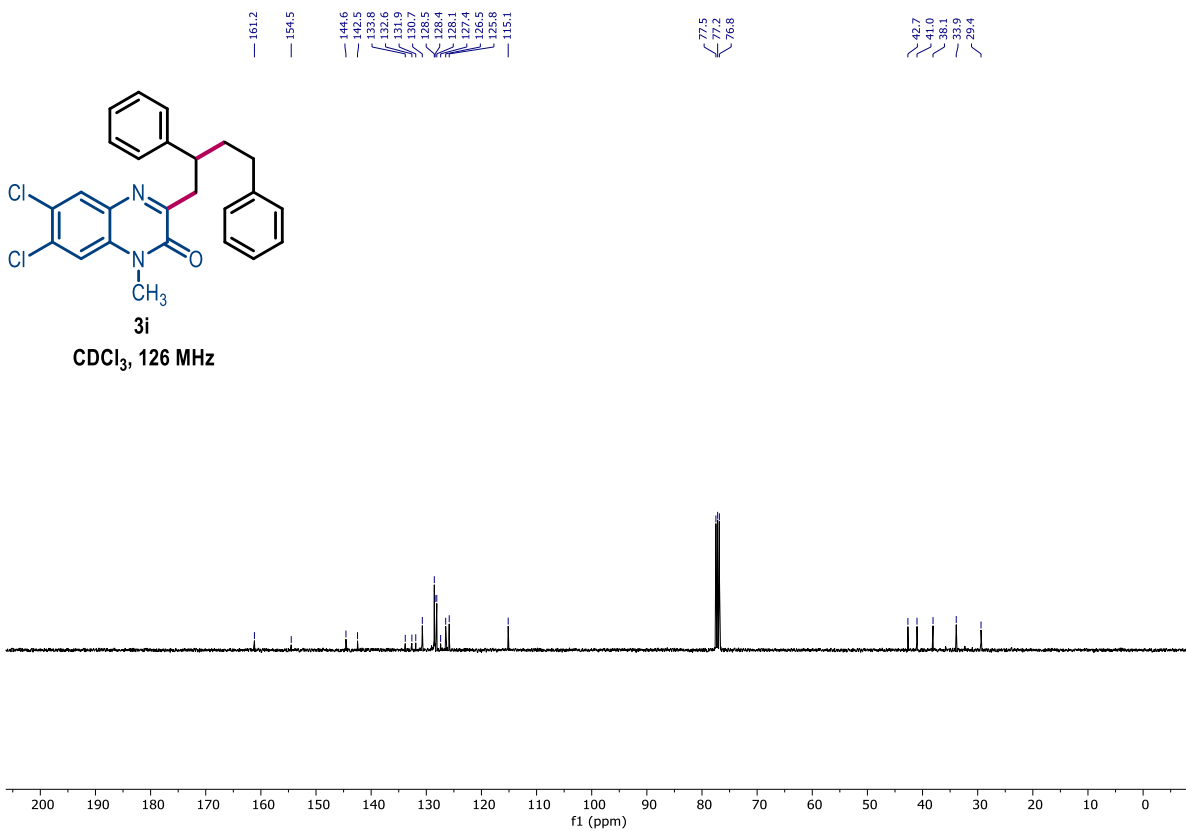

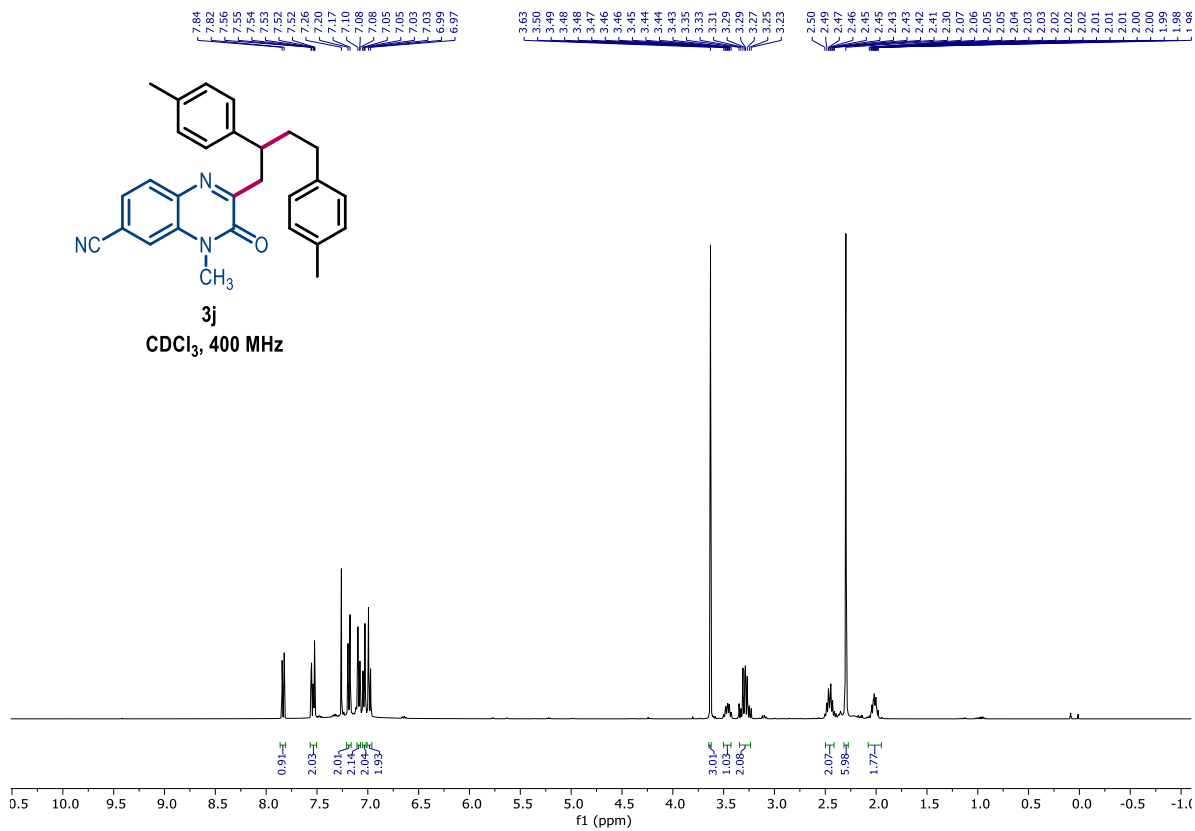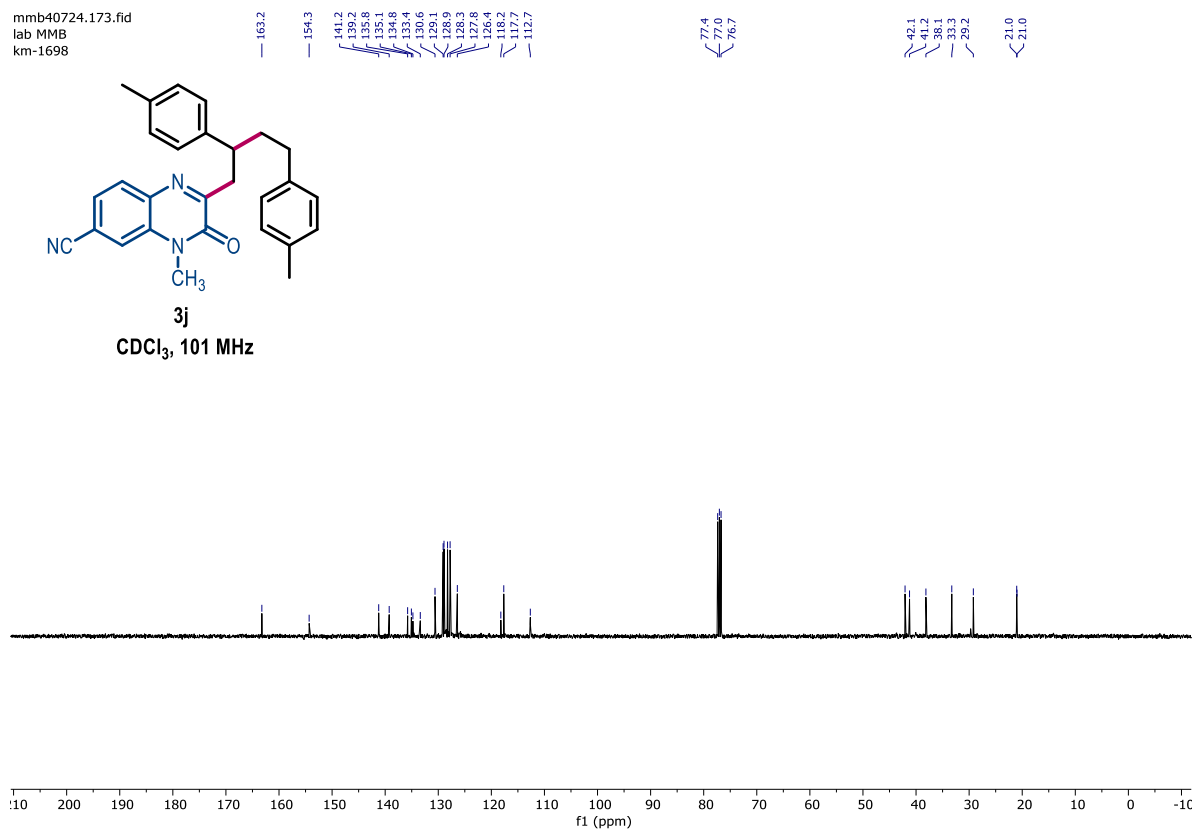

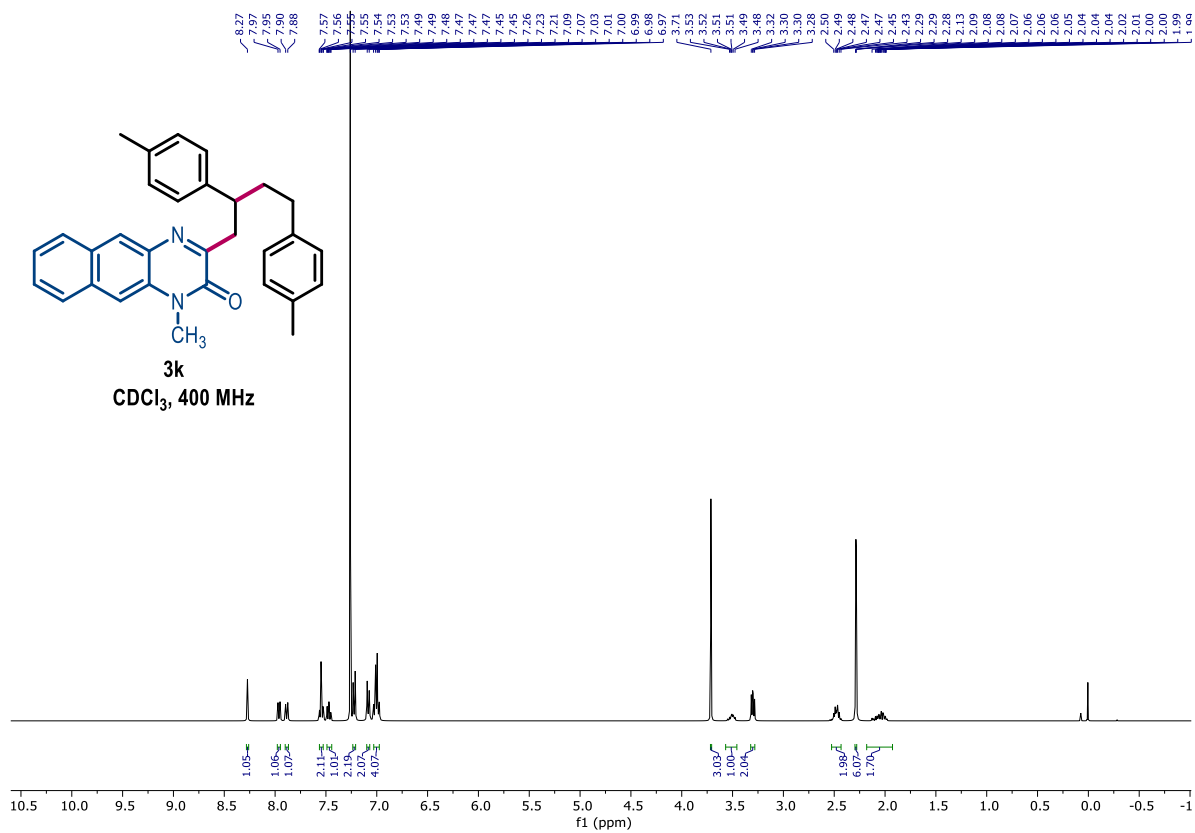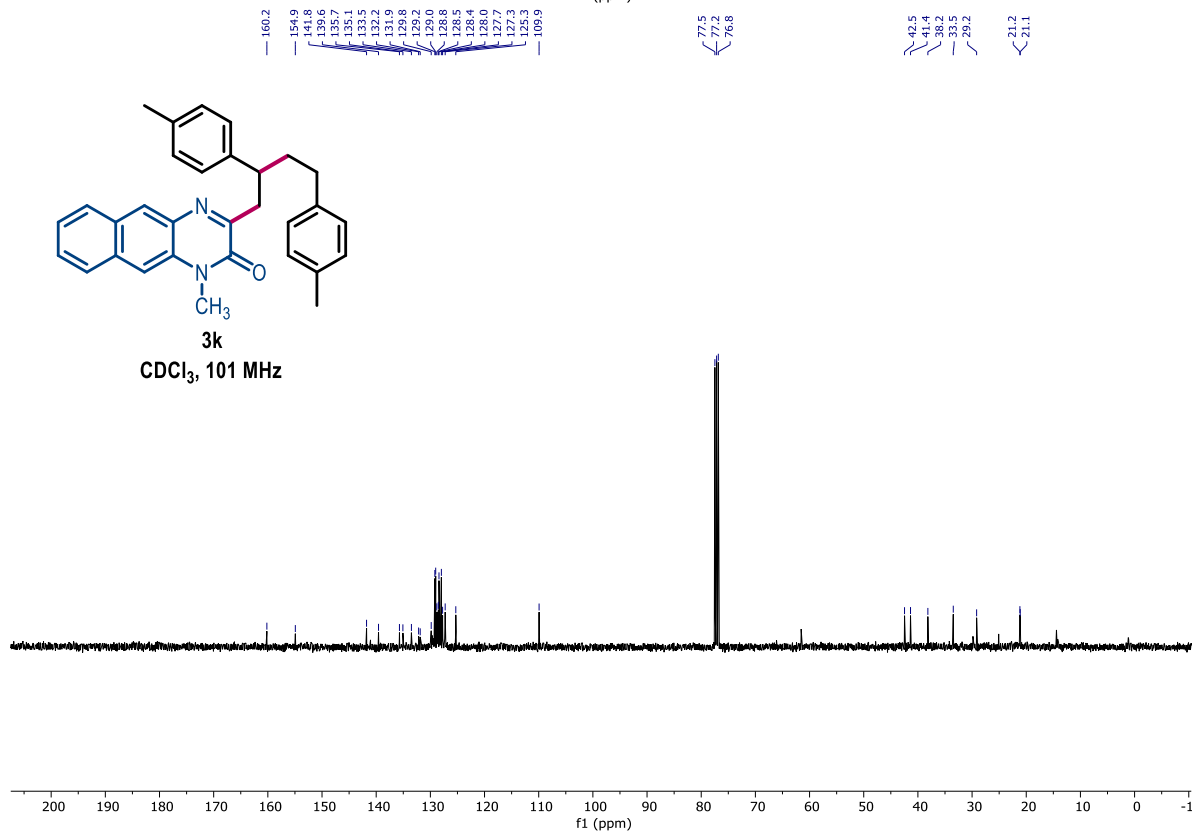

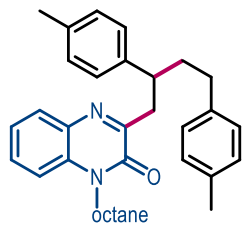

3I

CDCl<sub>3</sub>, 400 MHz

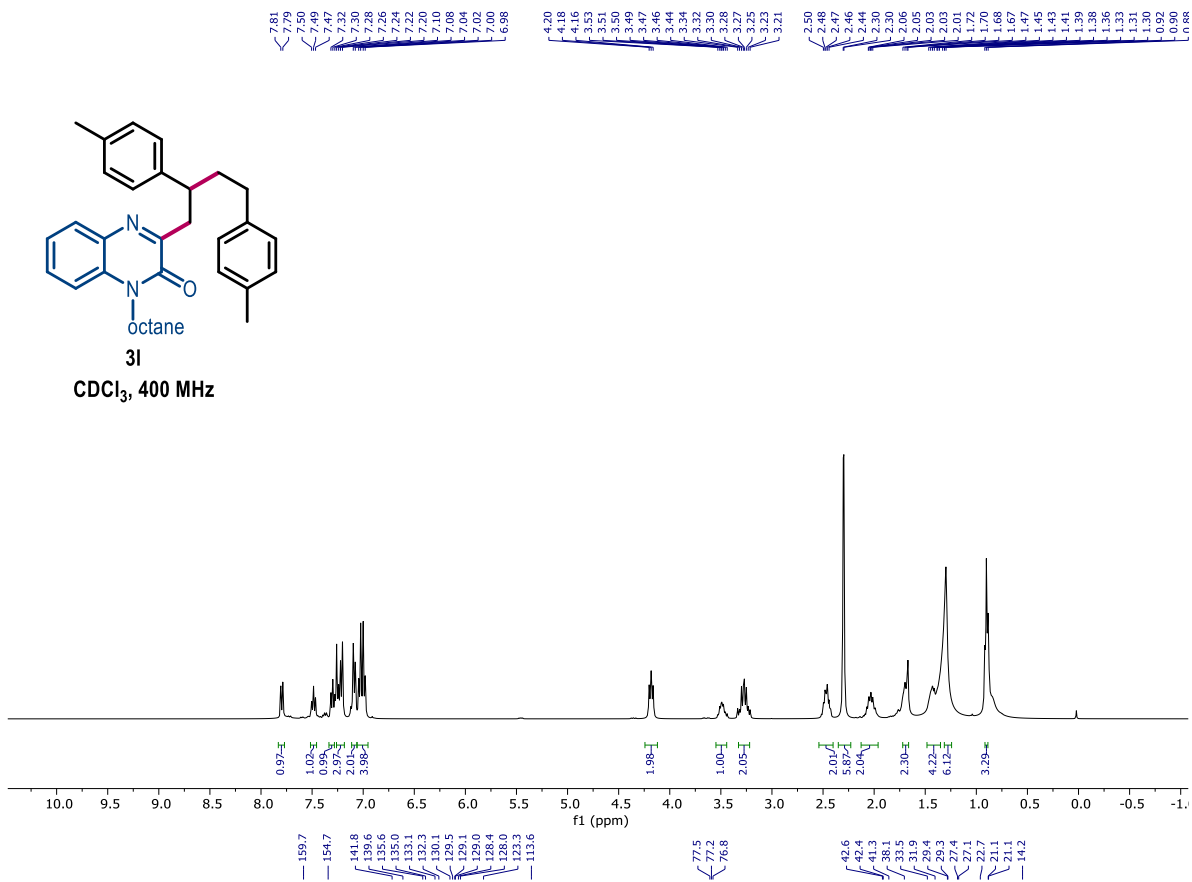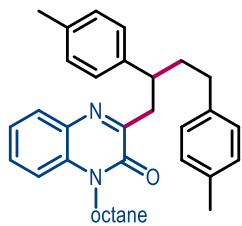

3I

CDCl<sub>3</sub>, 101 MHz

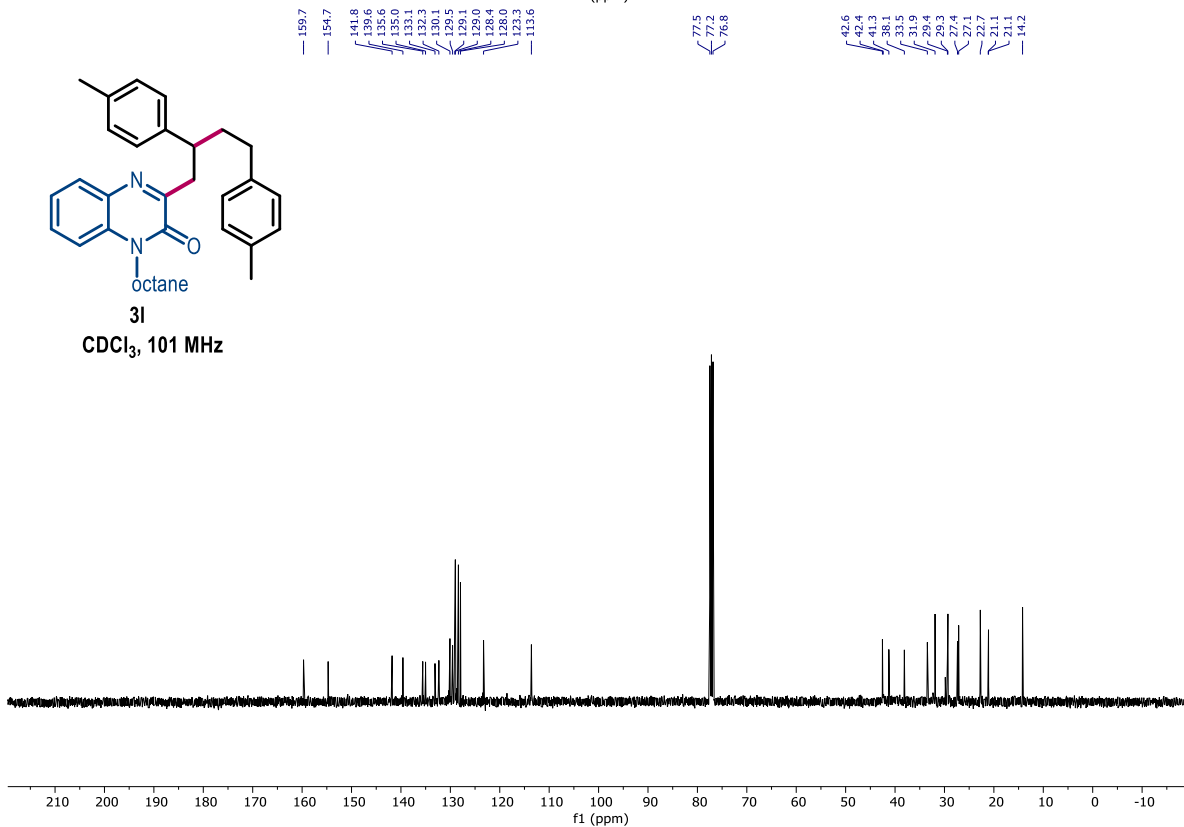

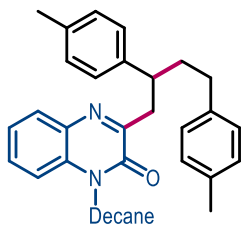

**3m**  
CDCl<sub>3</sub>, 400 MHz

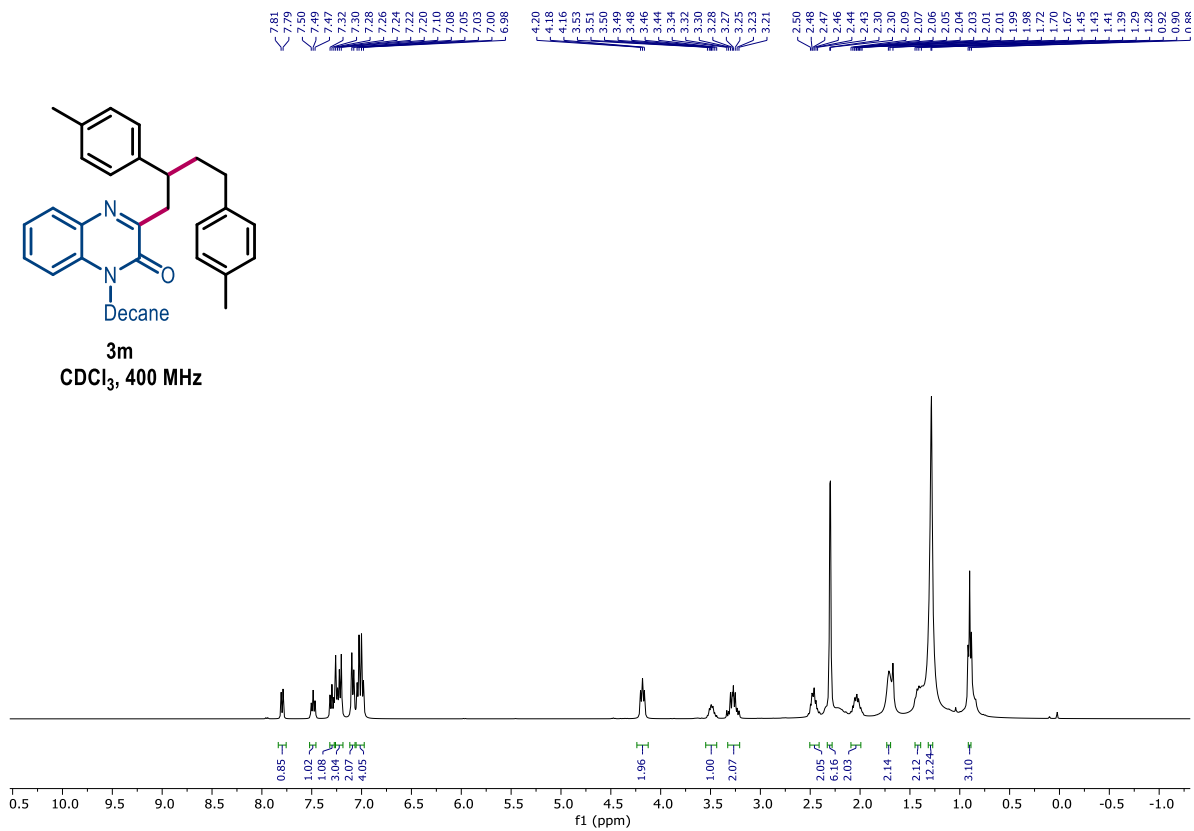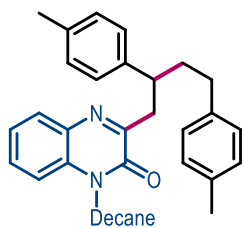

**3m**  
CDCl<sub>3</sub>, 101 MHz

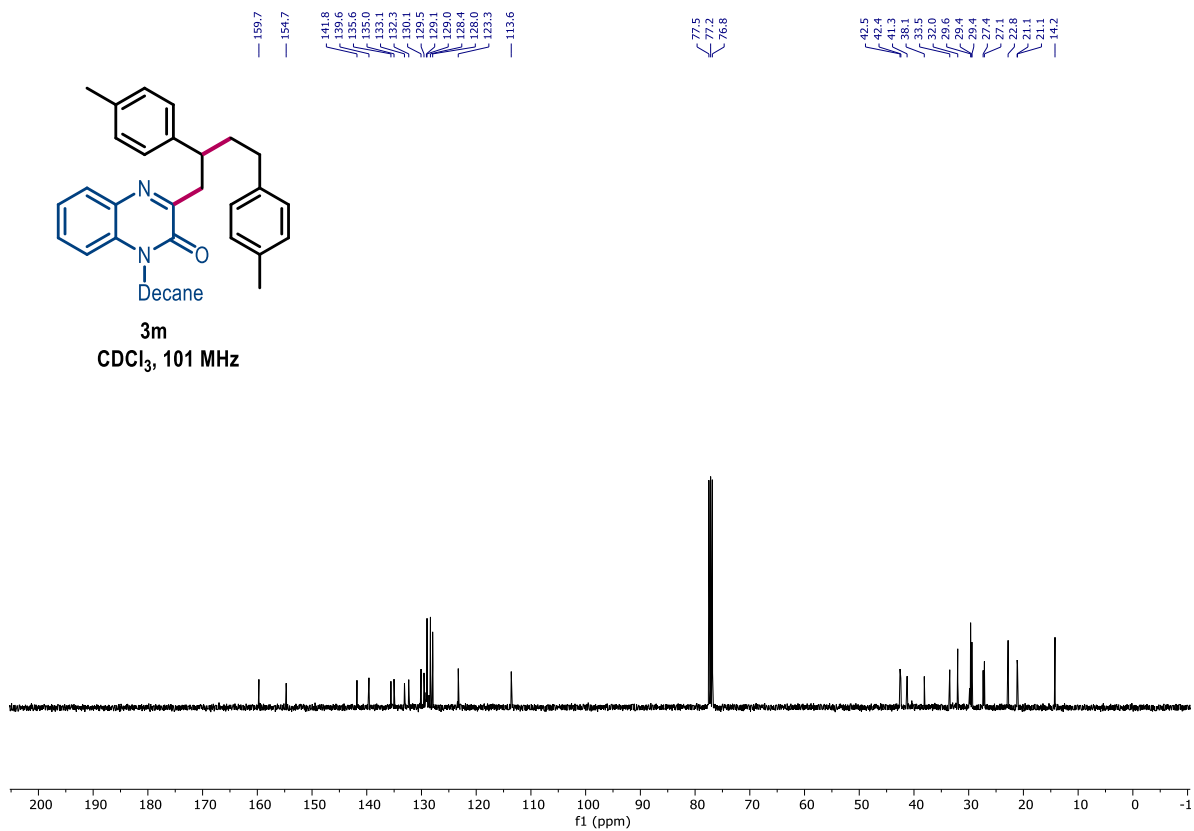



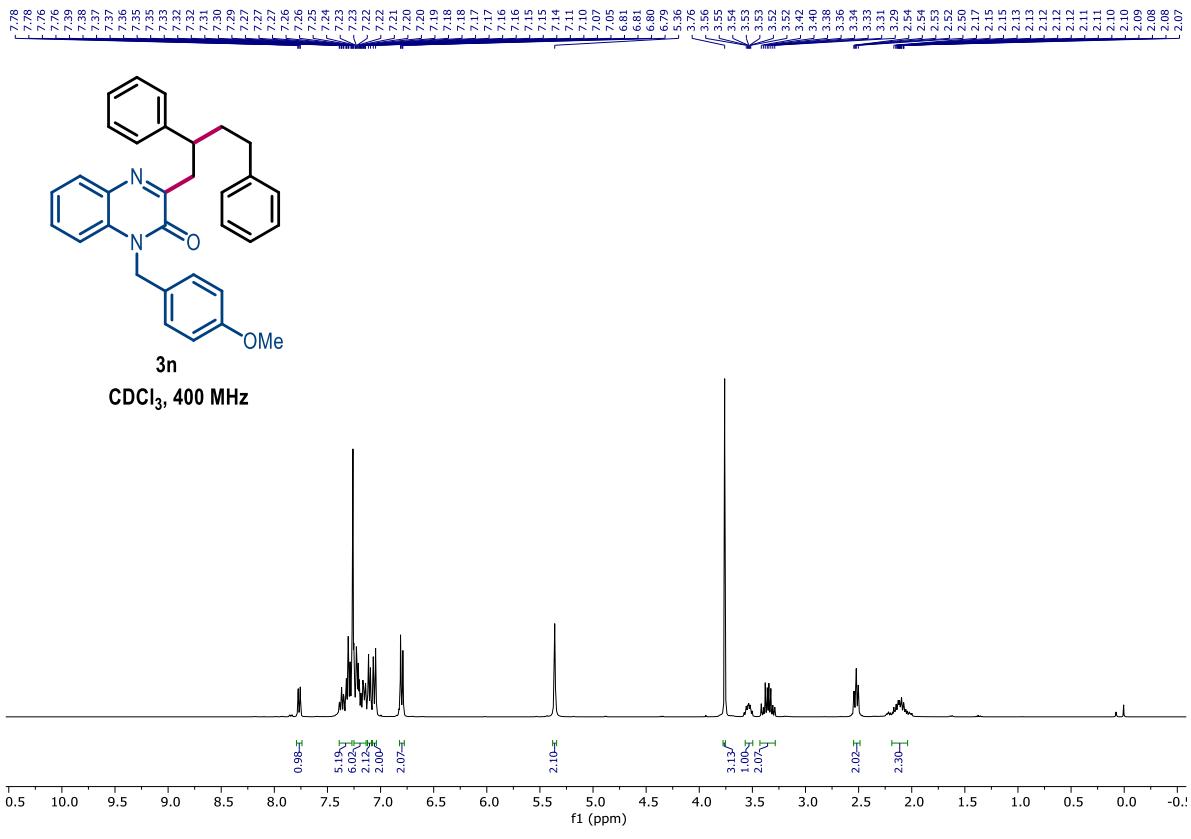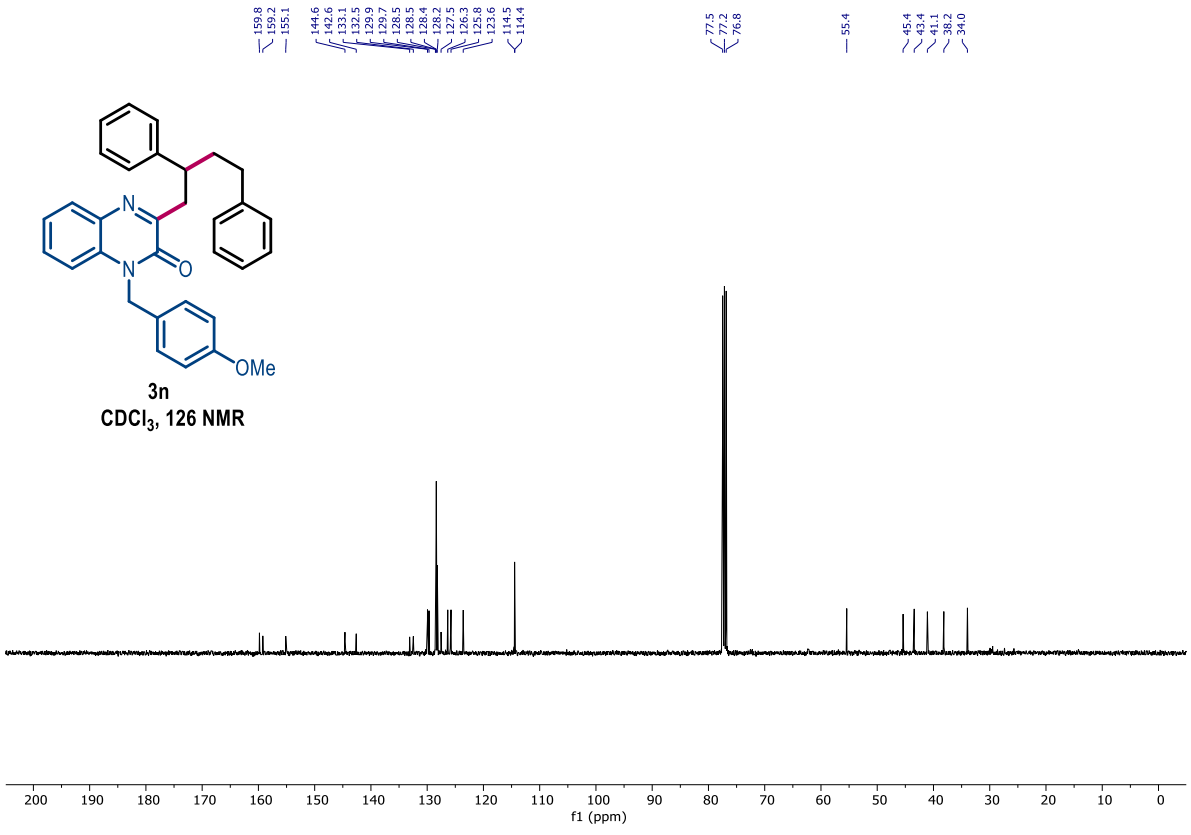

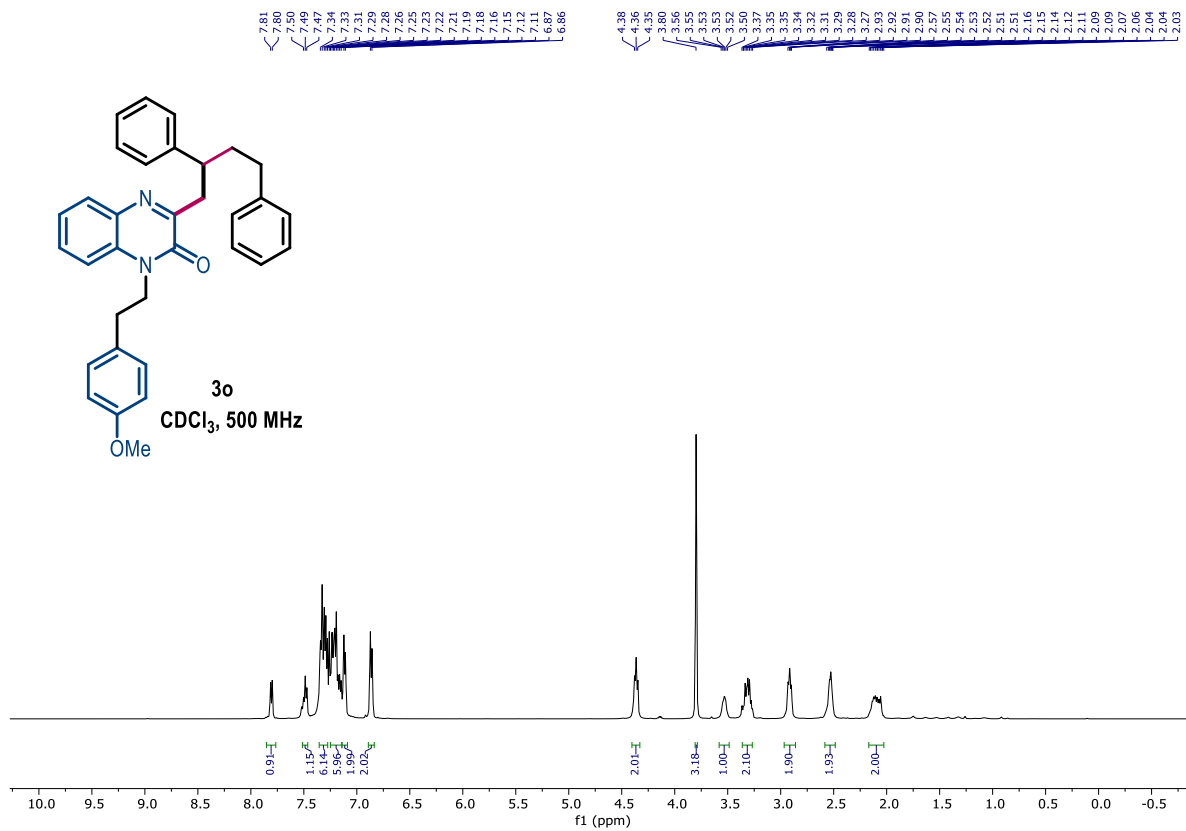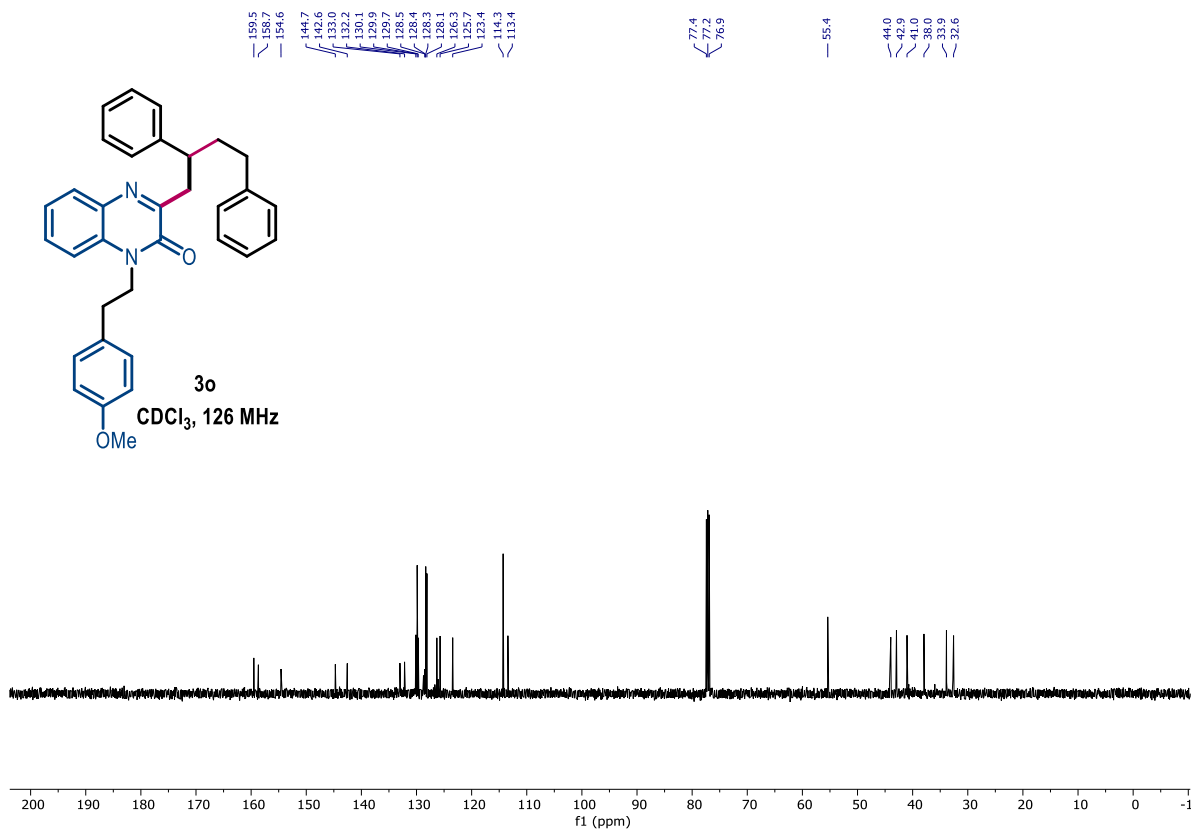

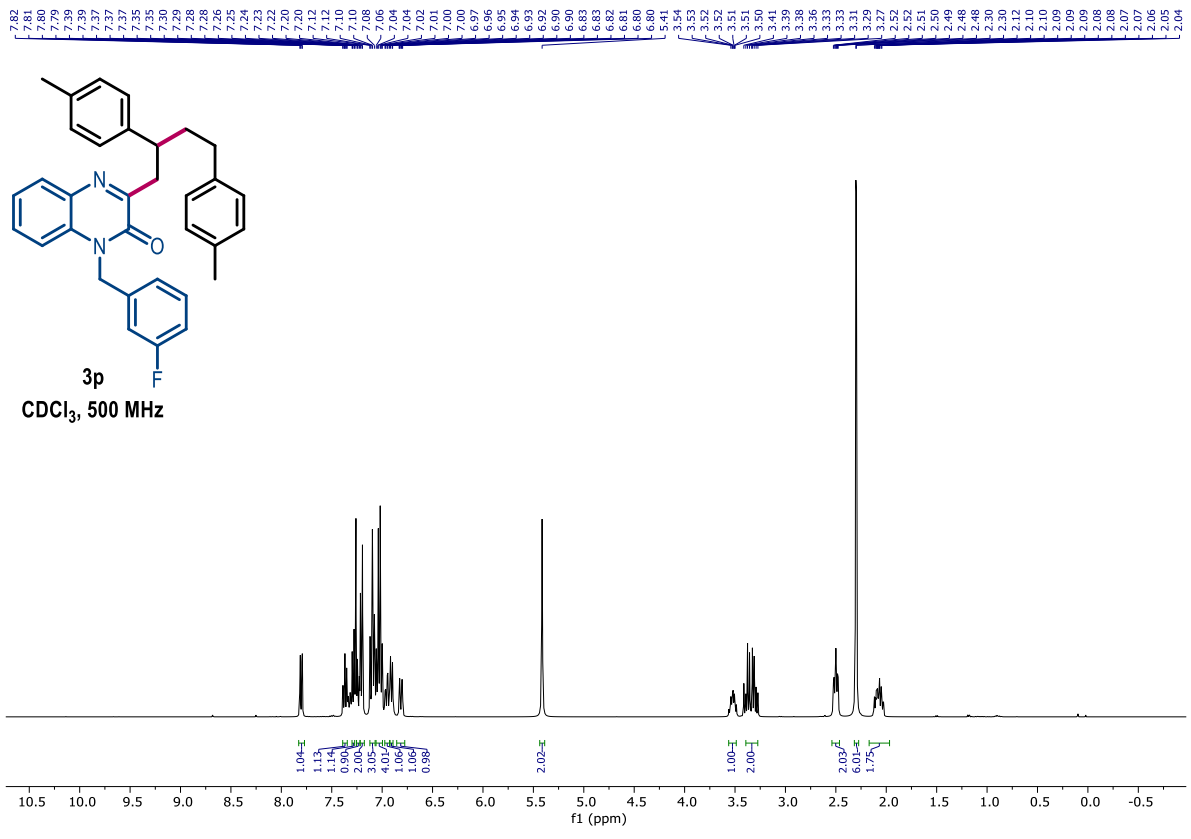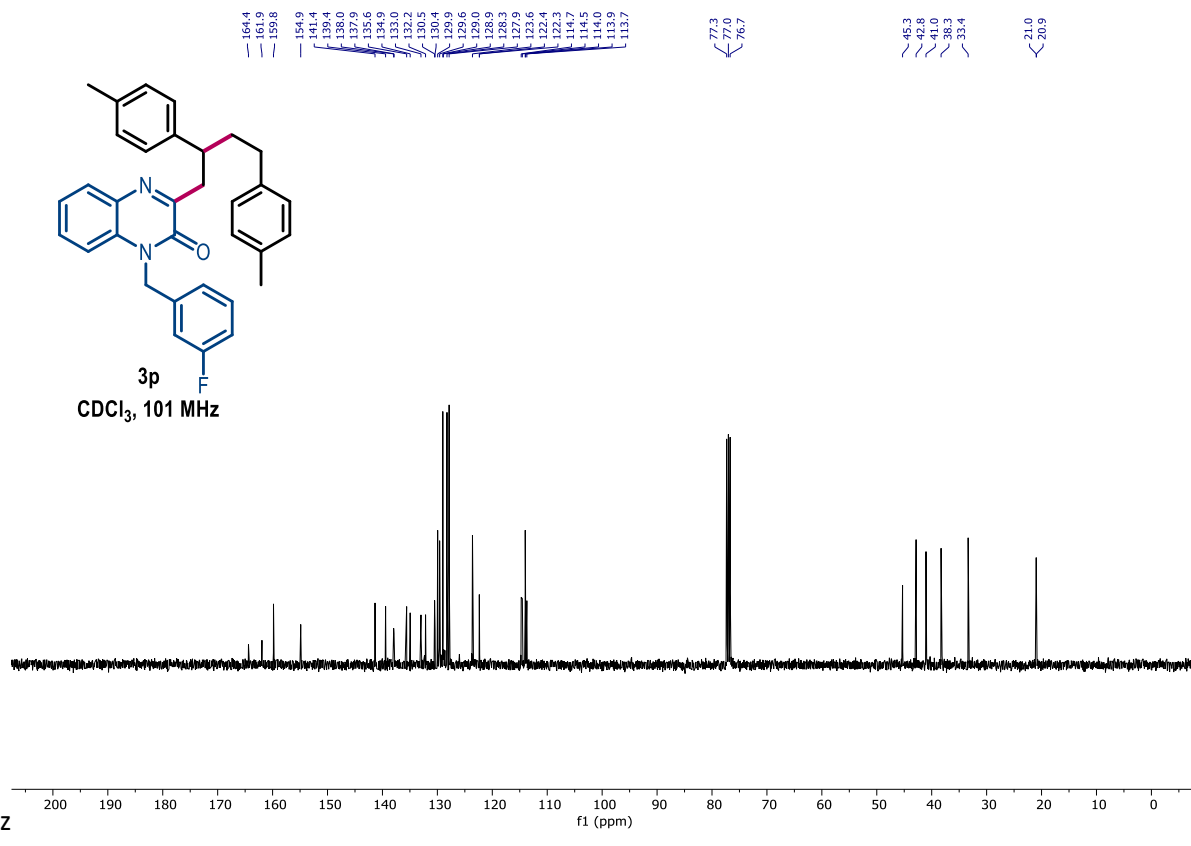

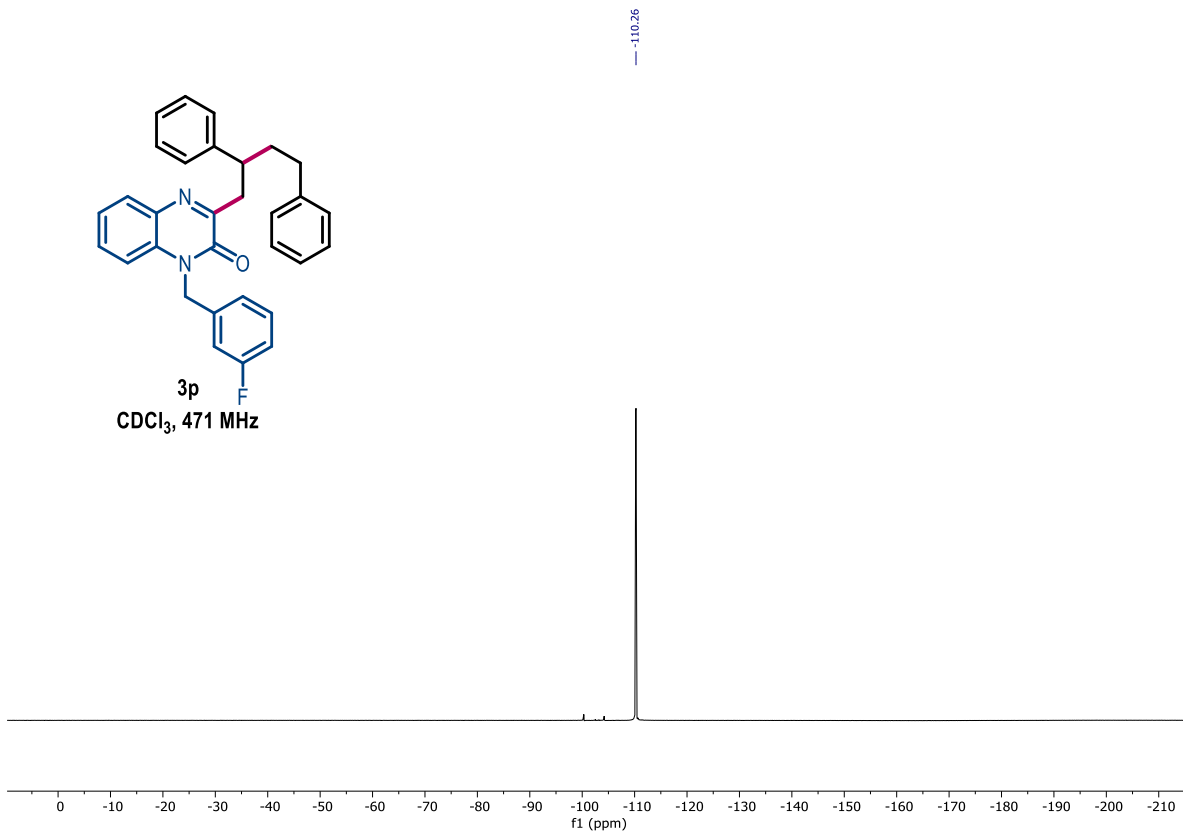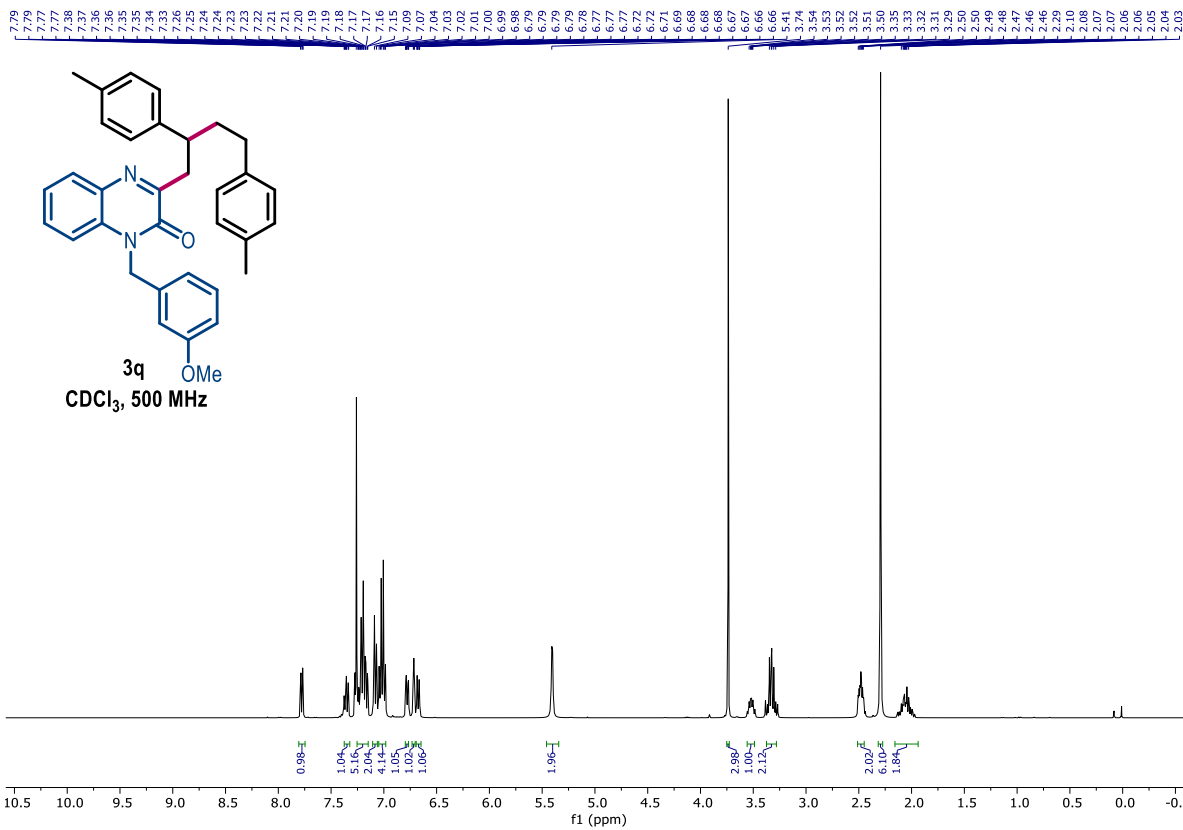

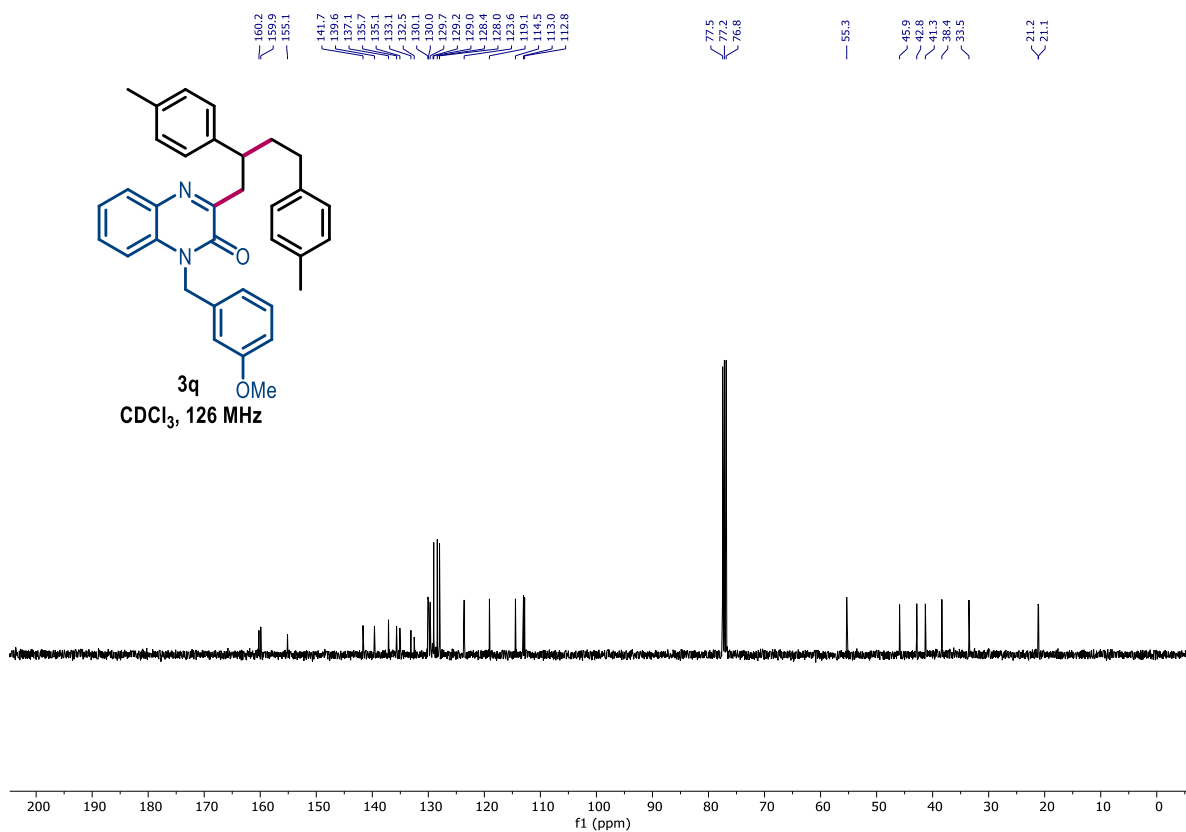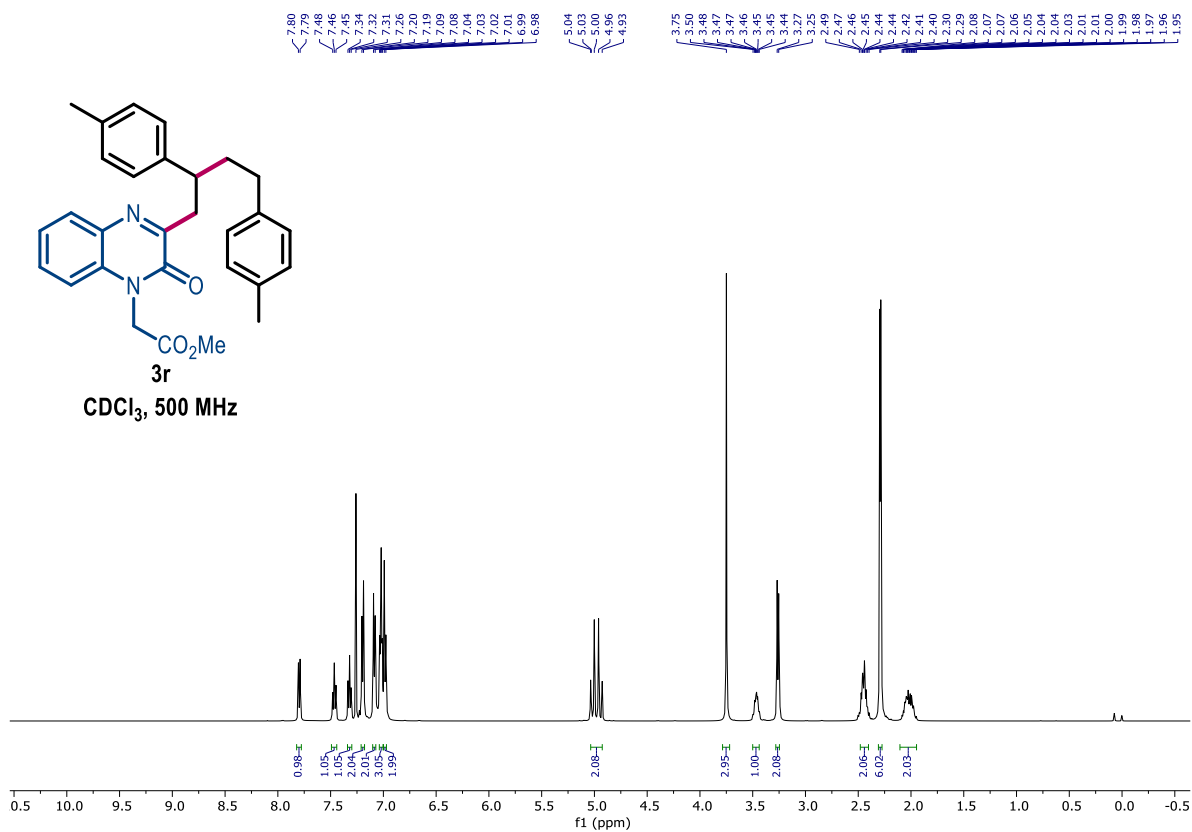

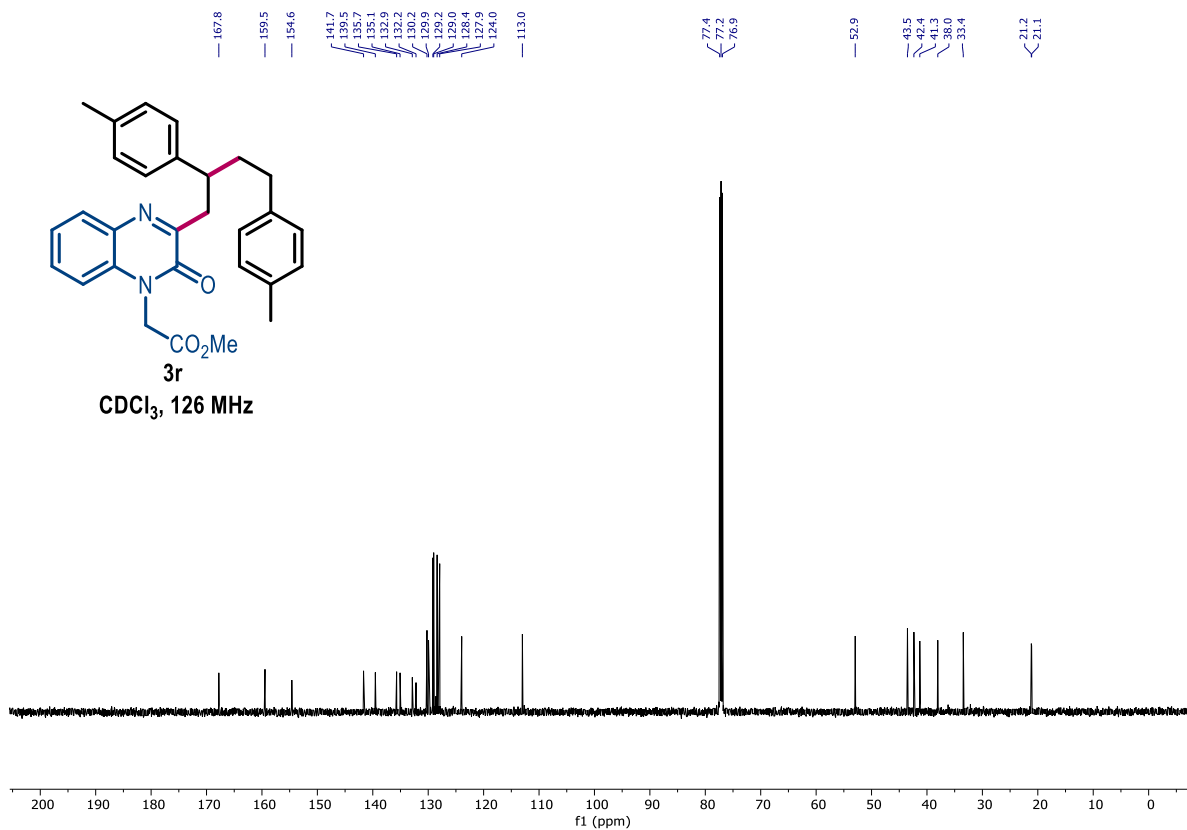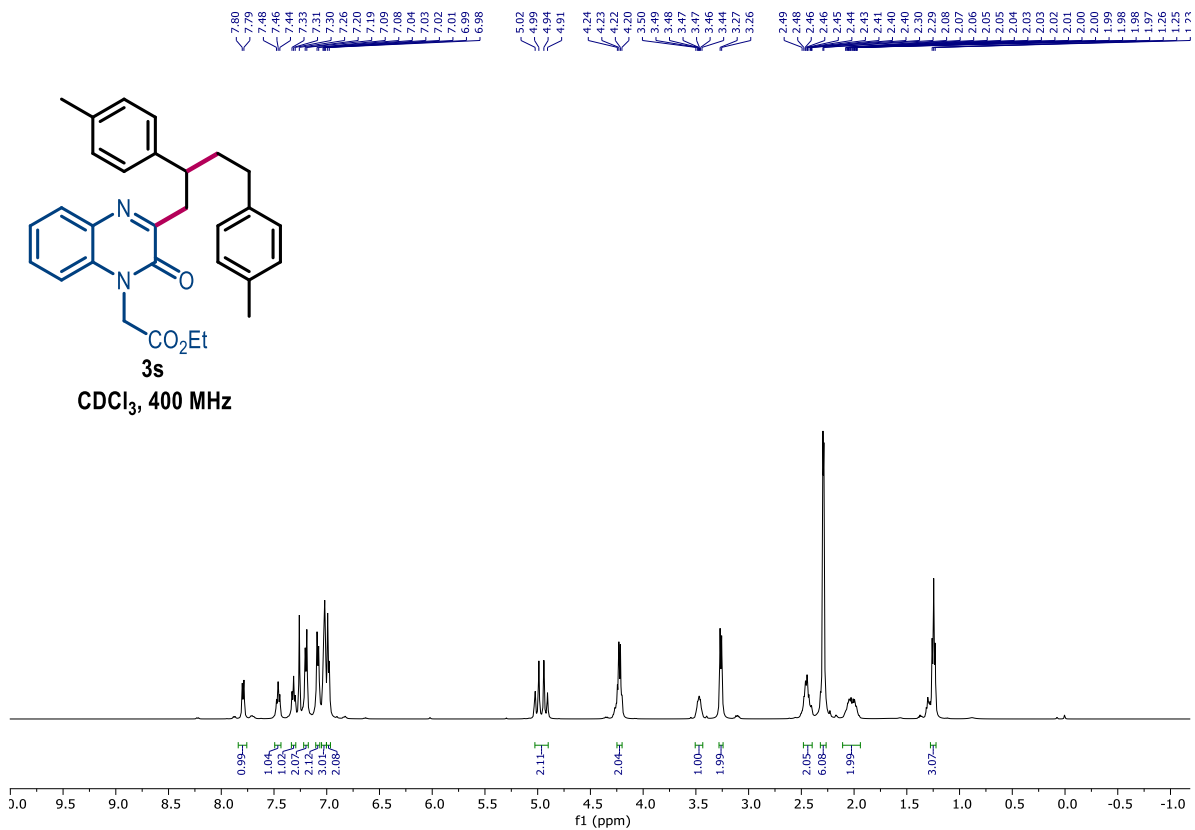

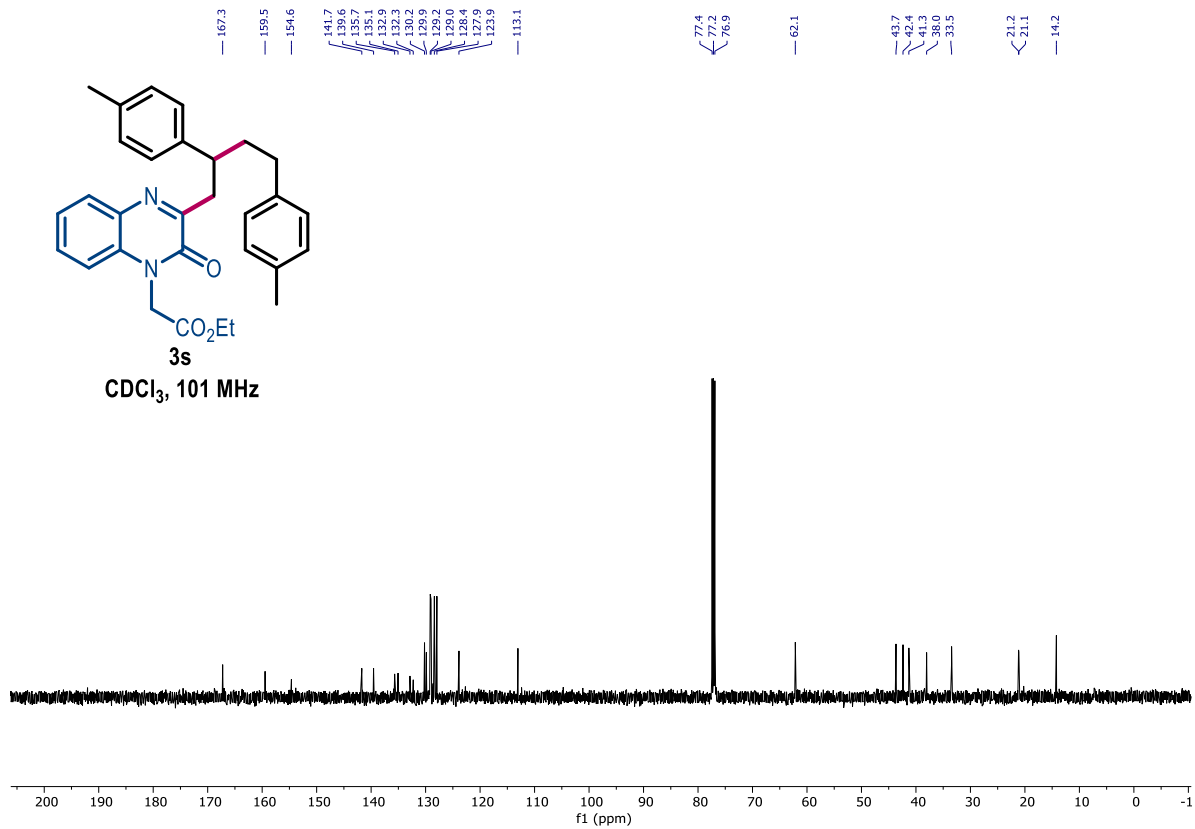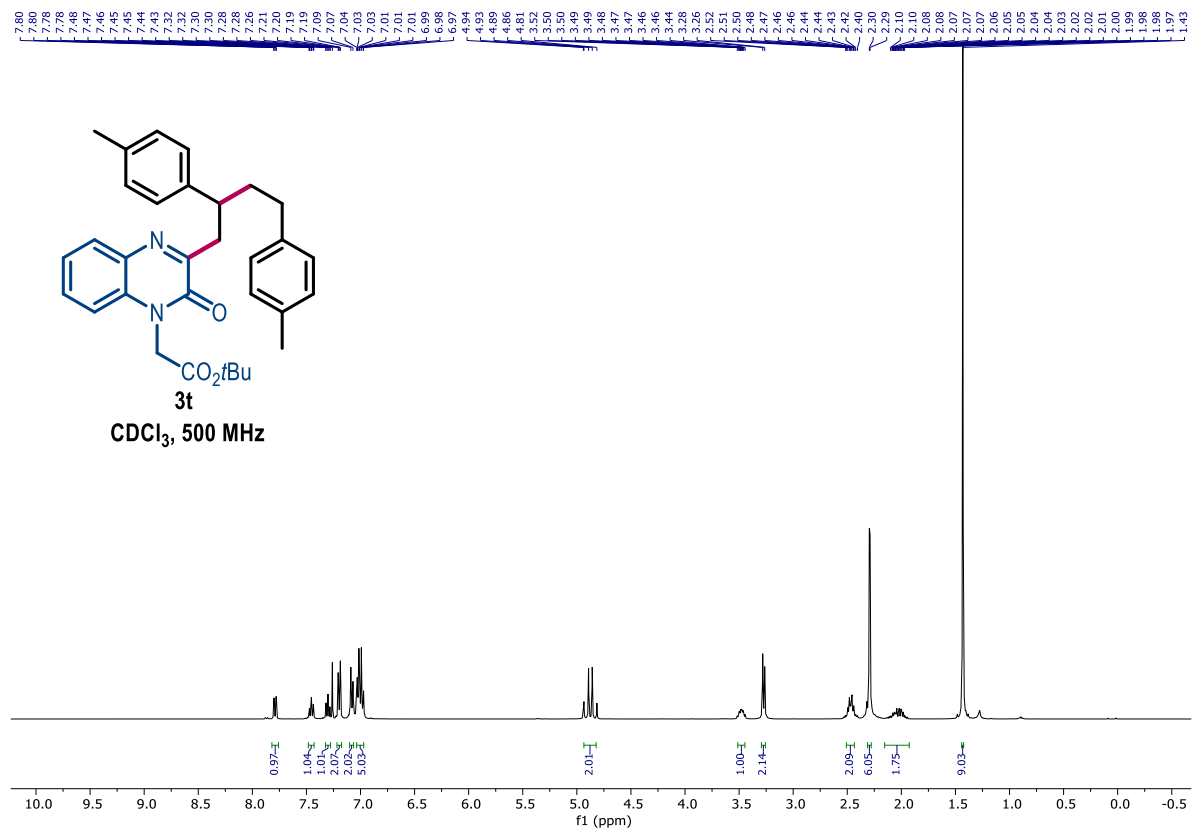

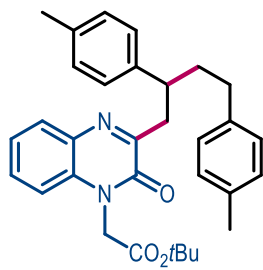

**3t**  
CDCl<sub>3</sub>, 126 MHz

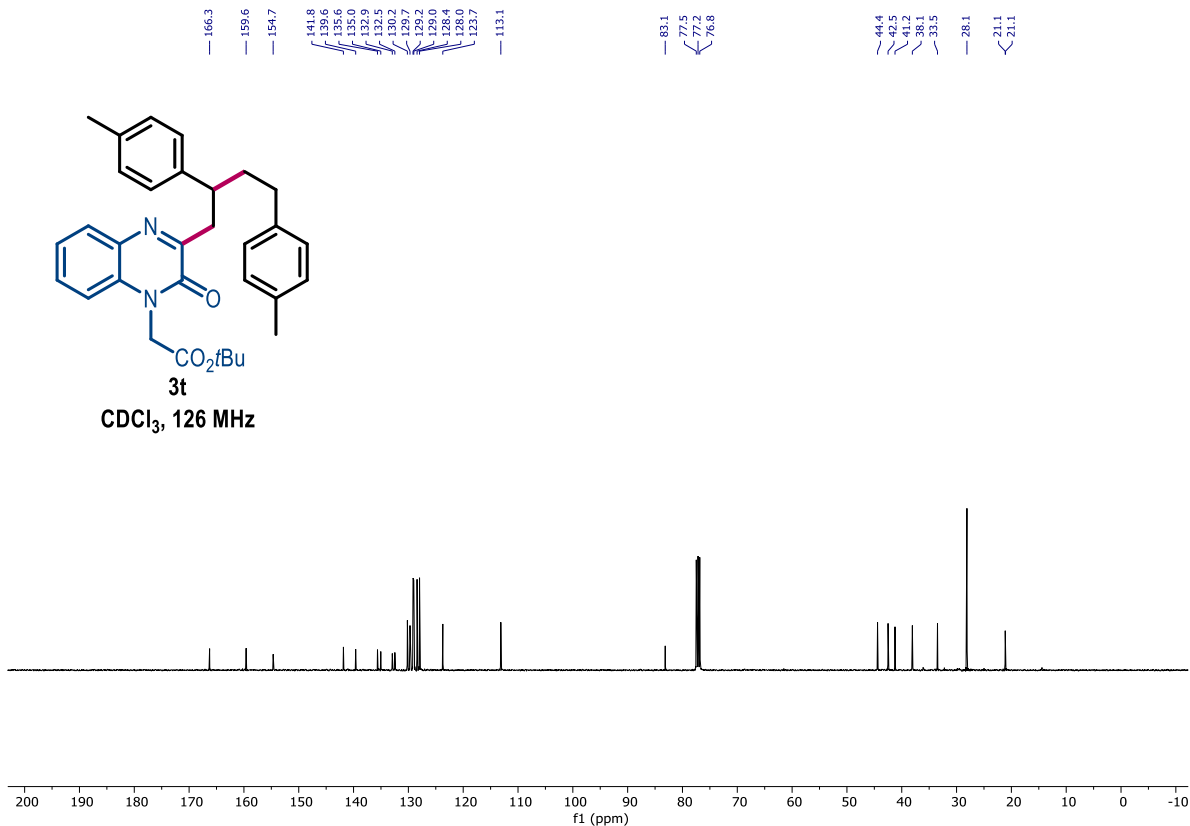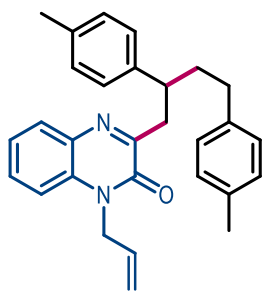

**3u**  
CDCl<sub>3</sub>, 400 MHz

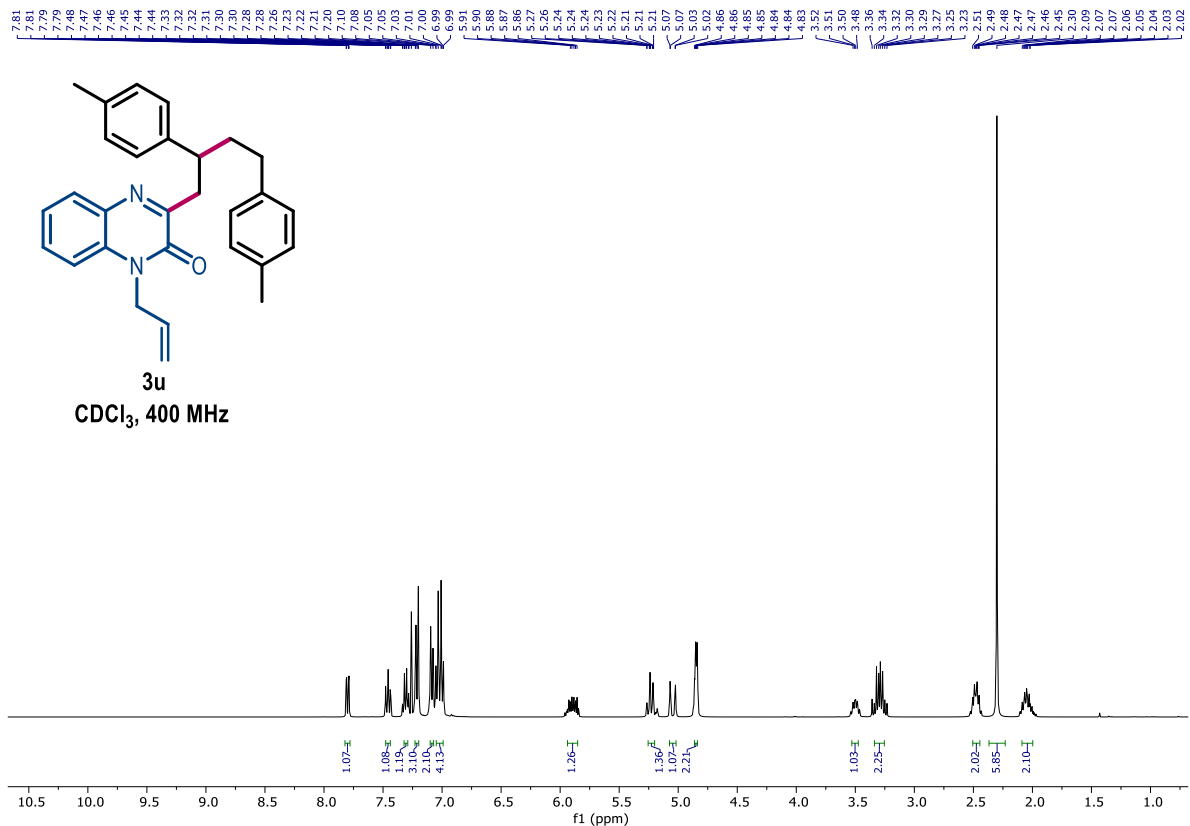



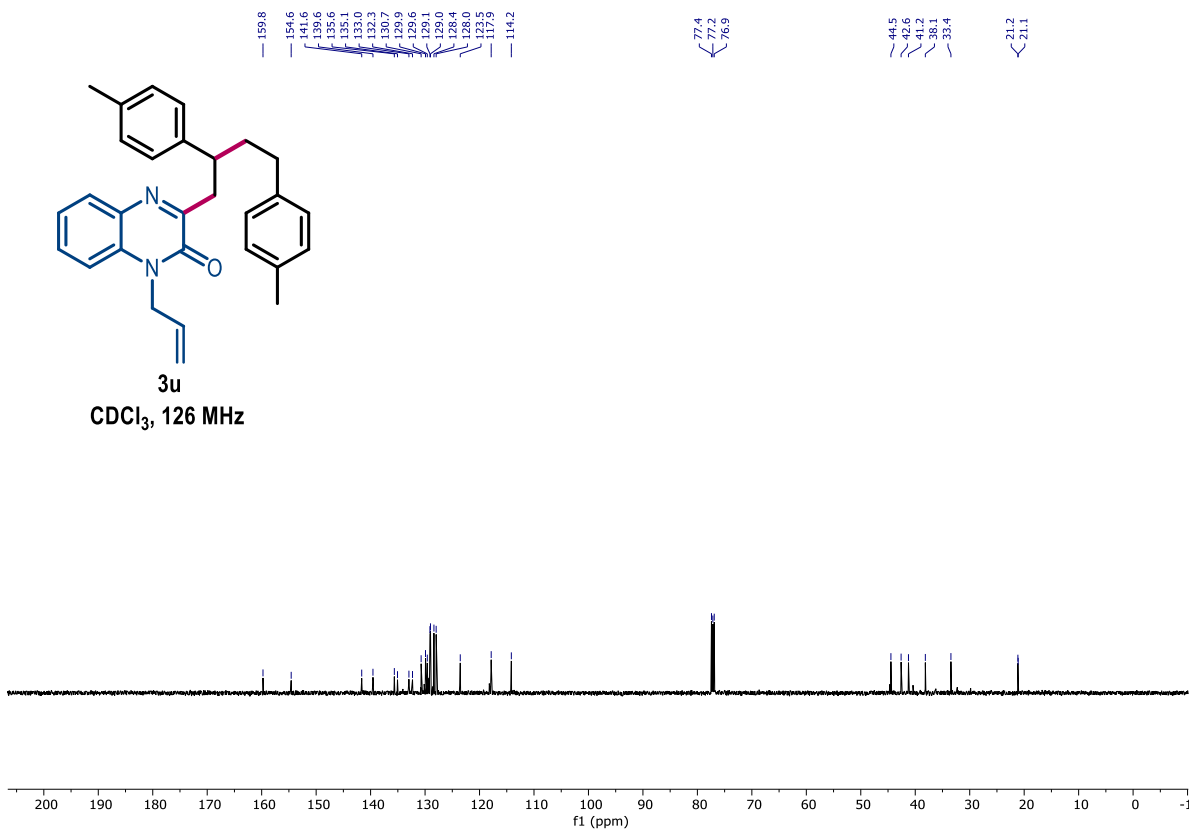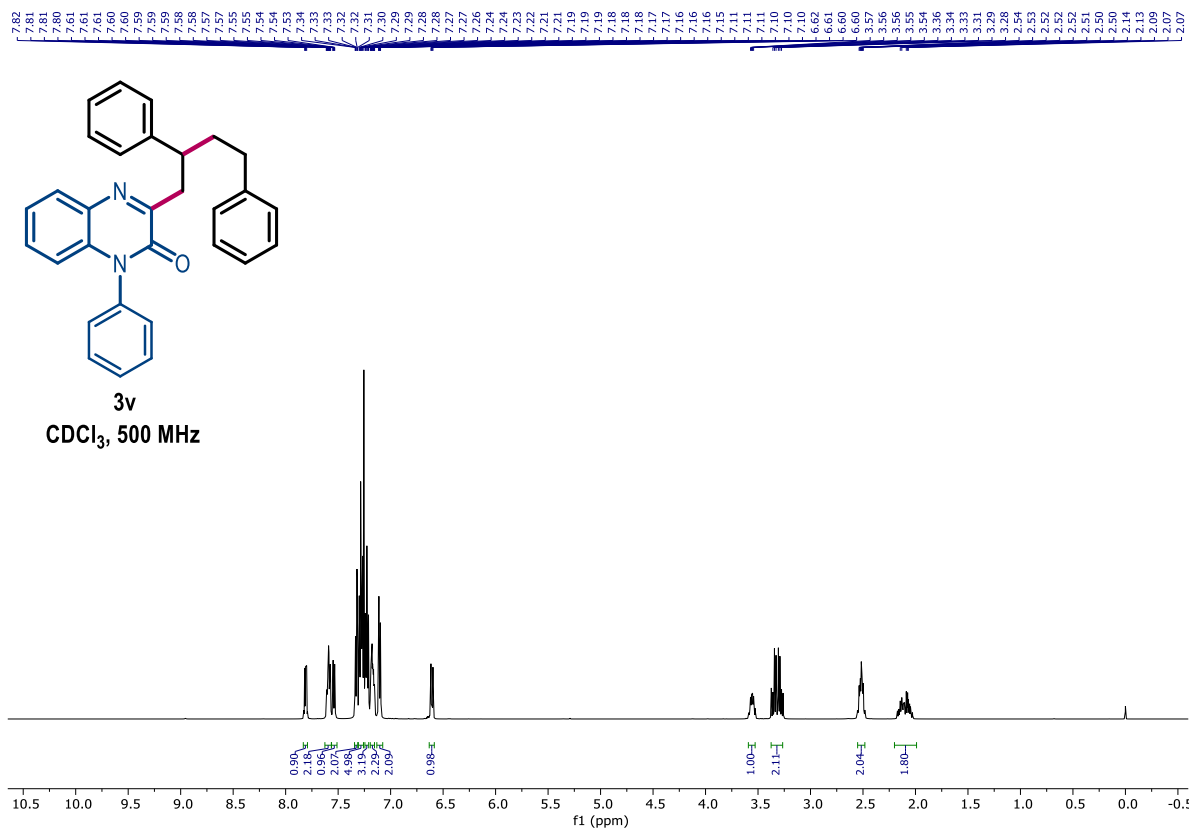

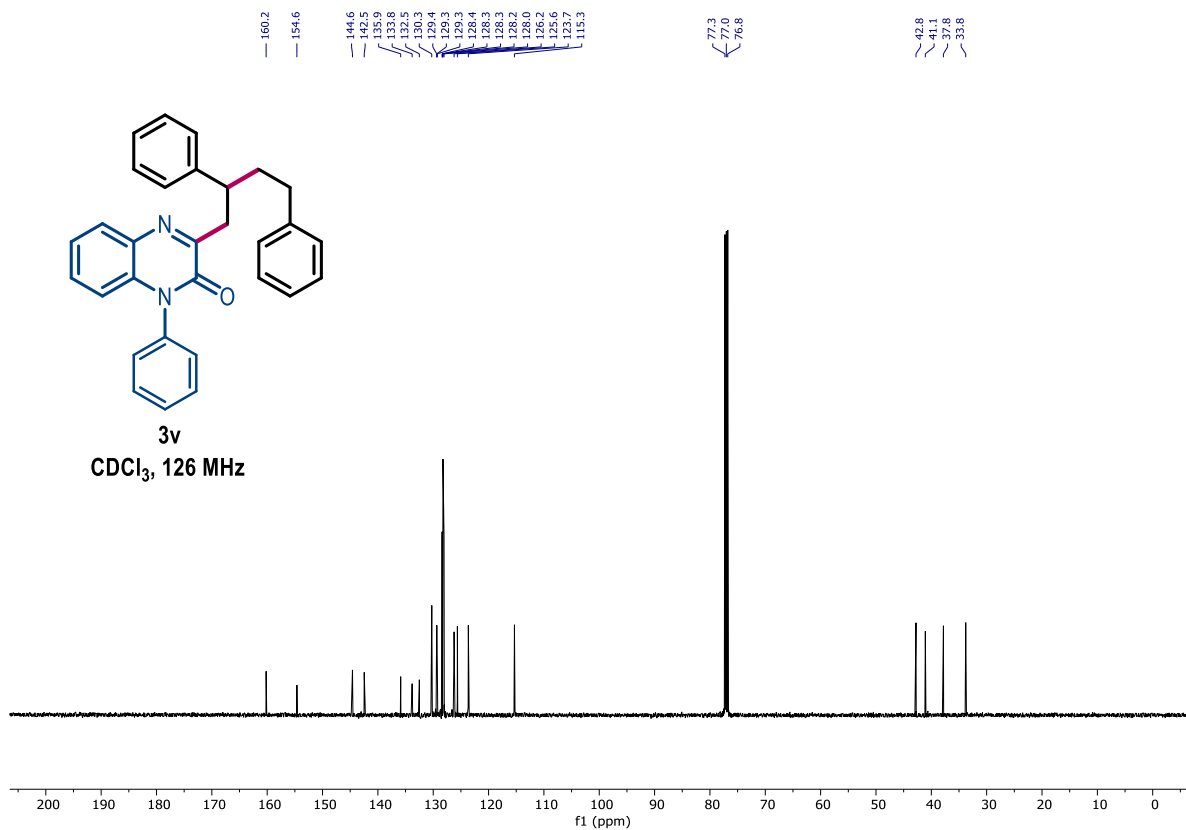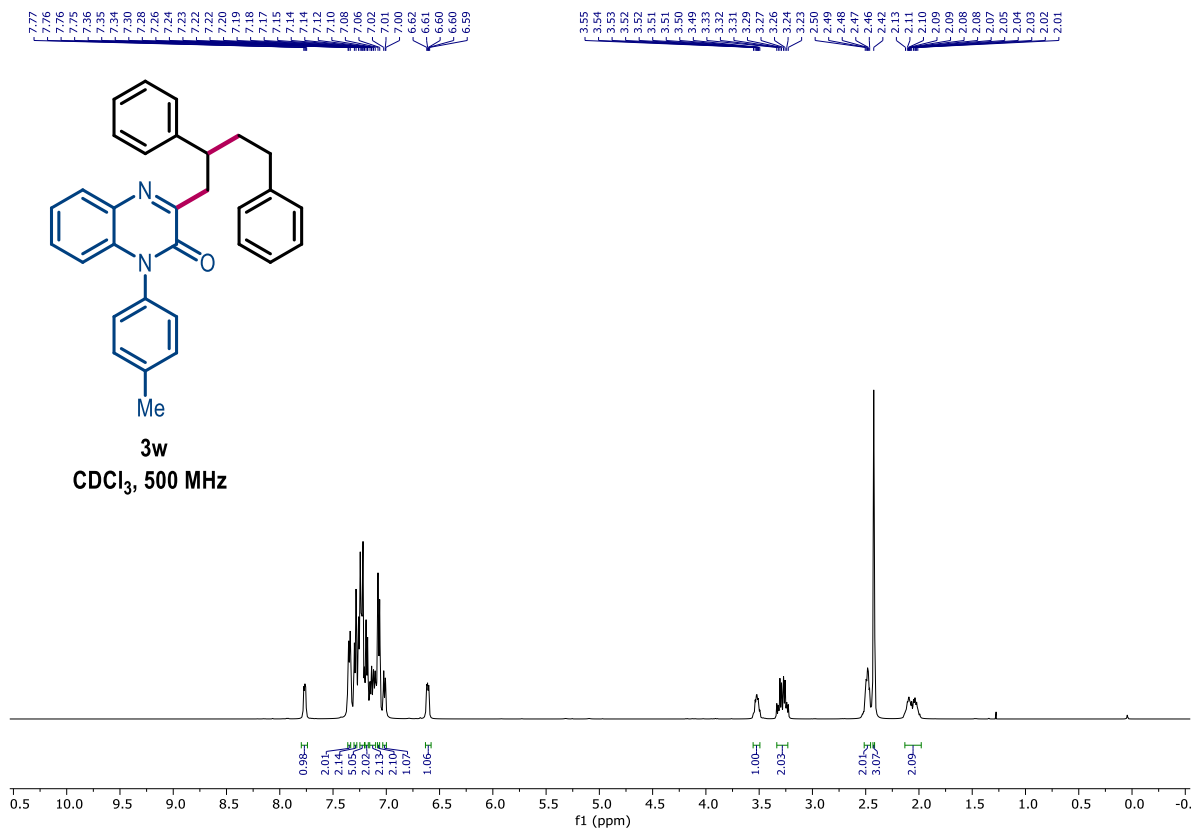

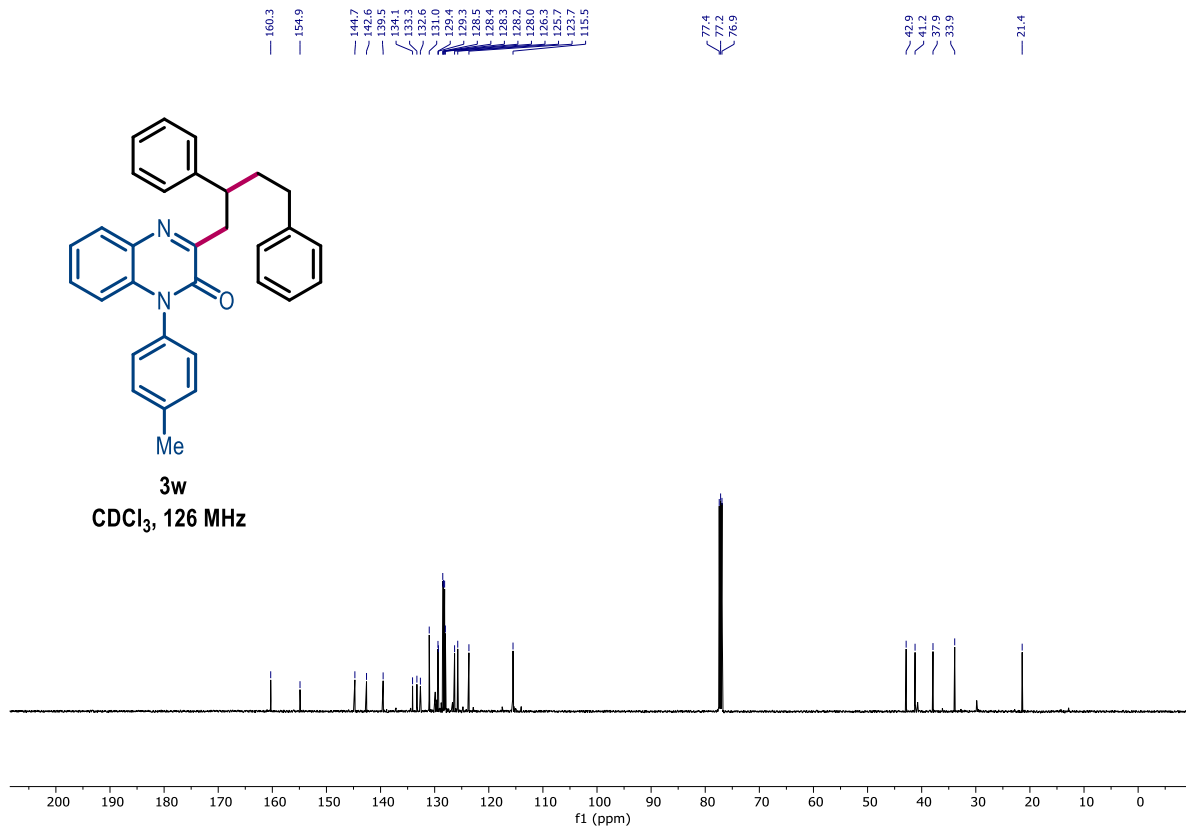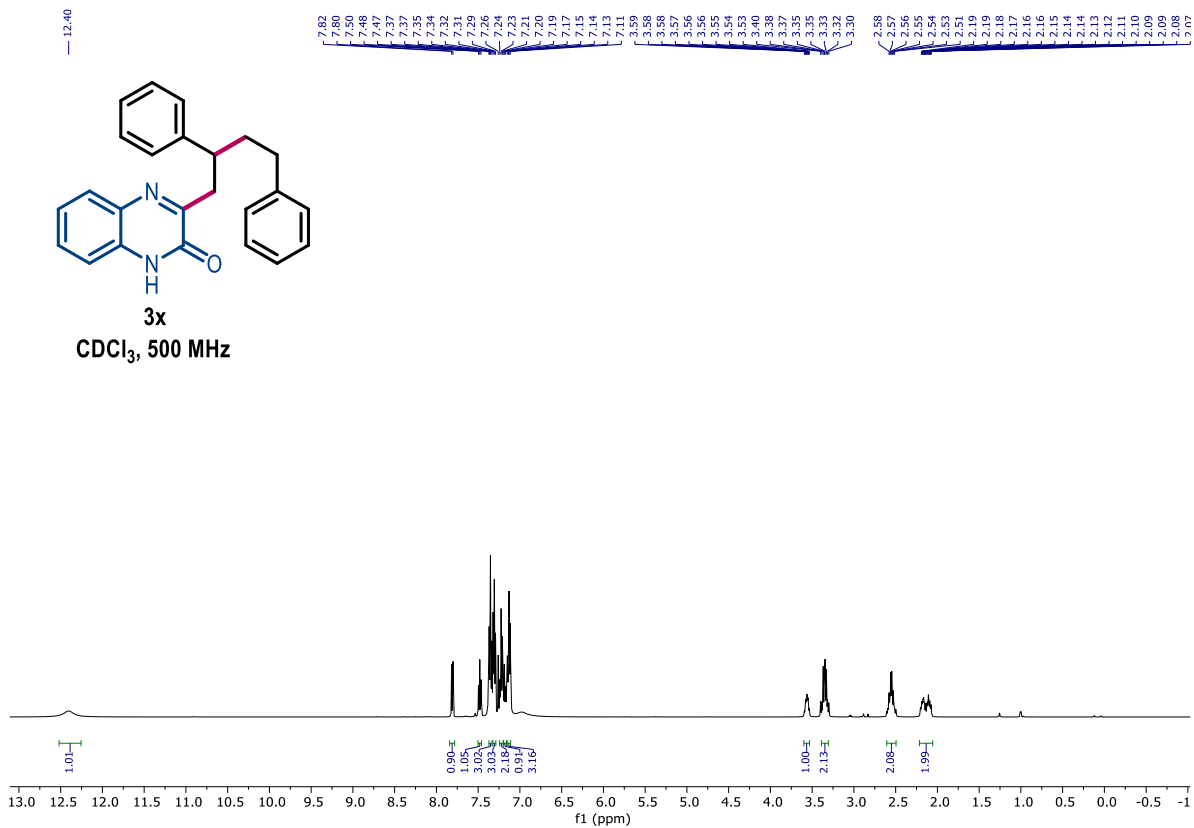

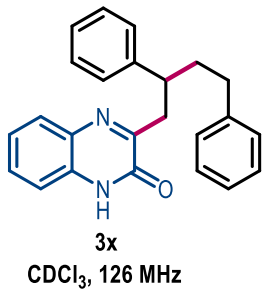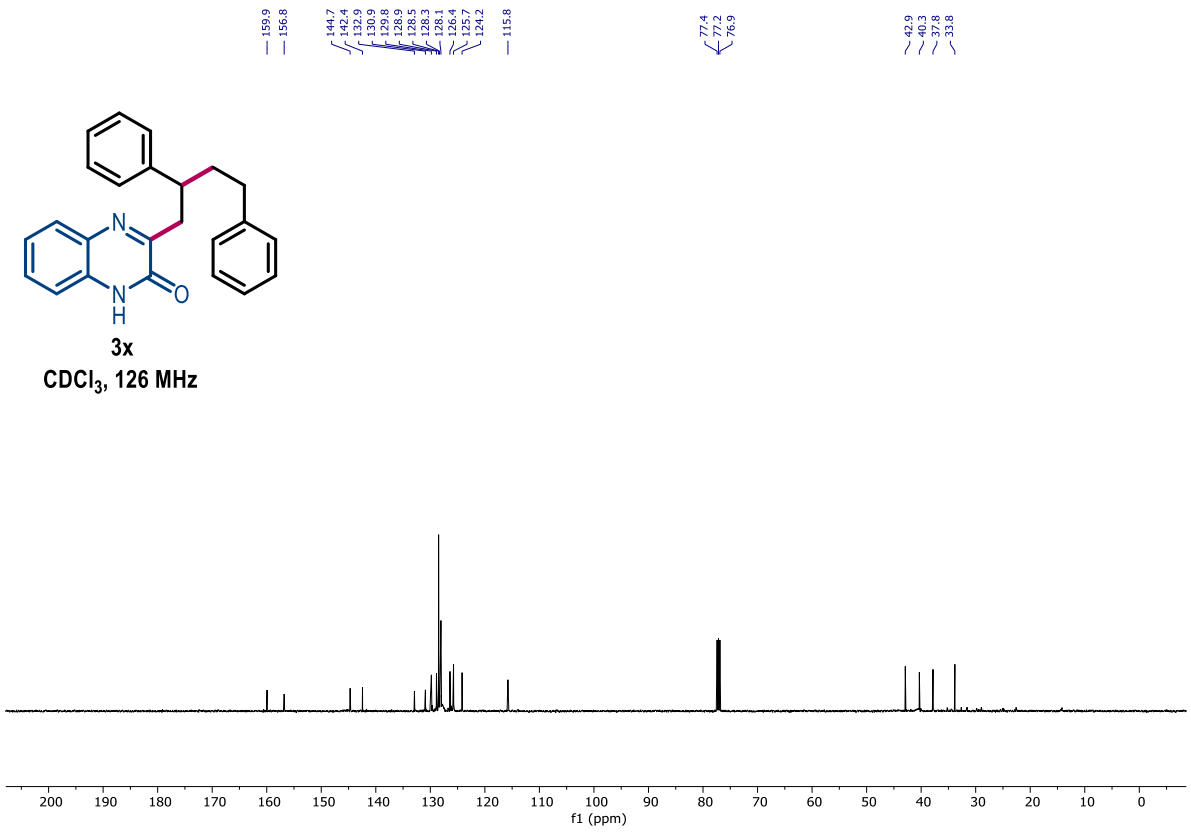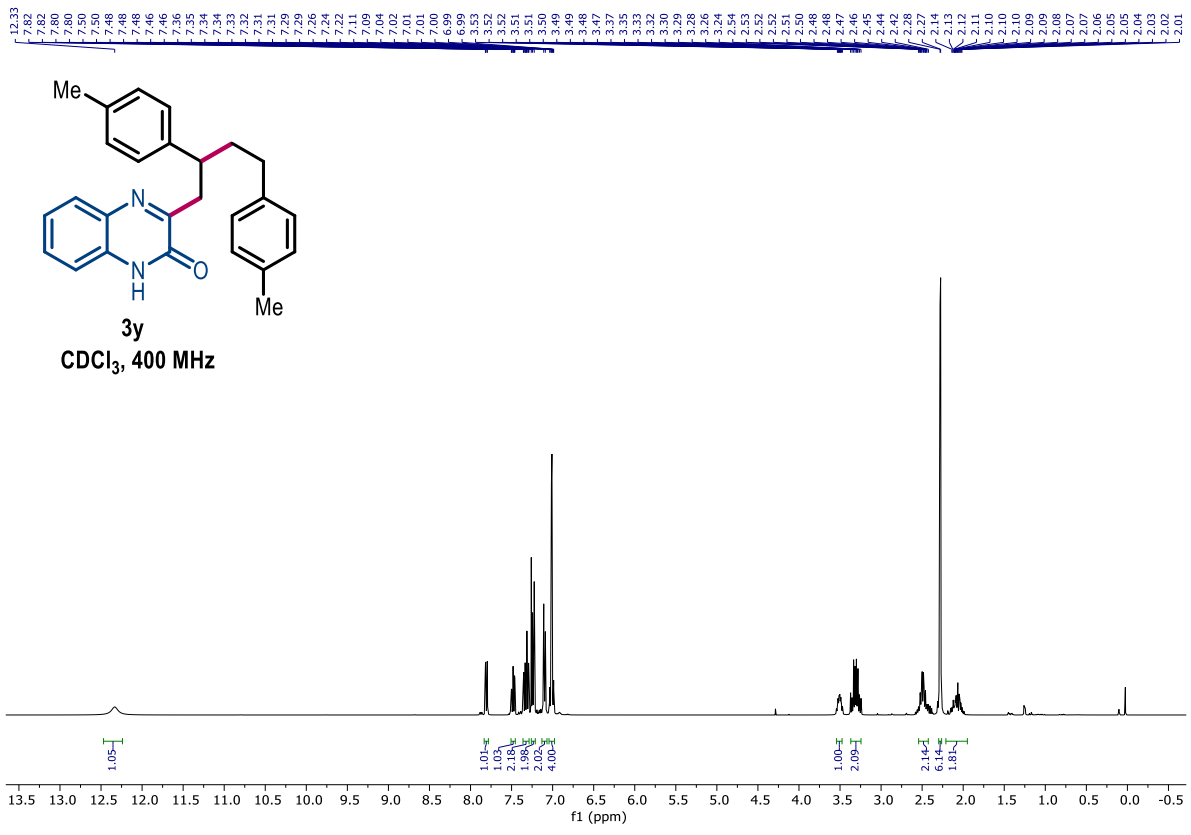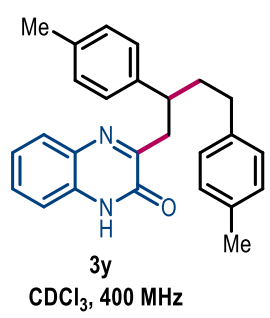

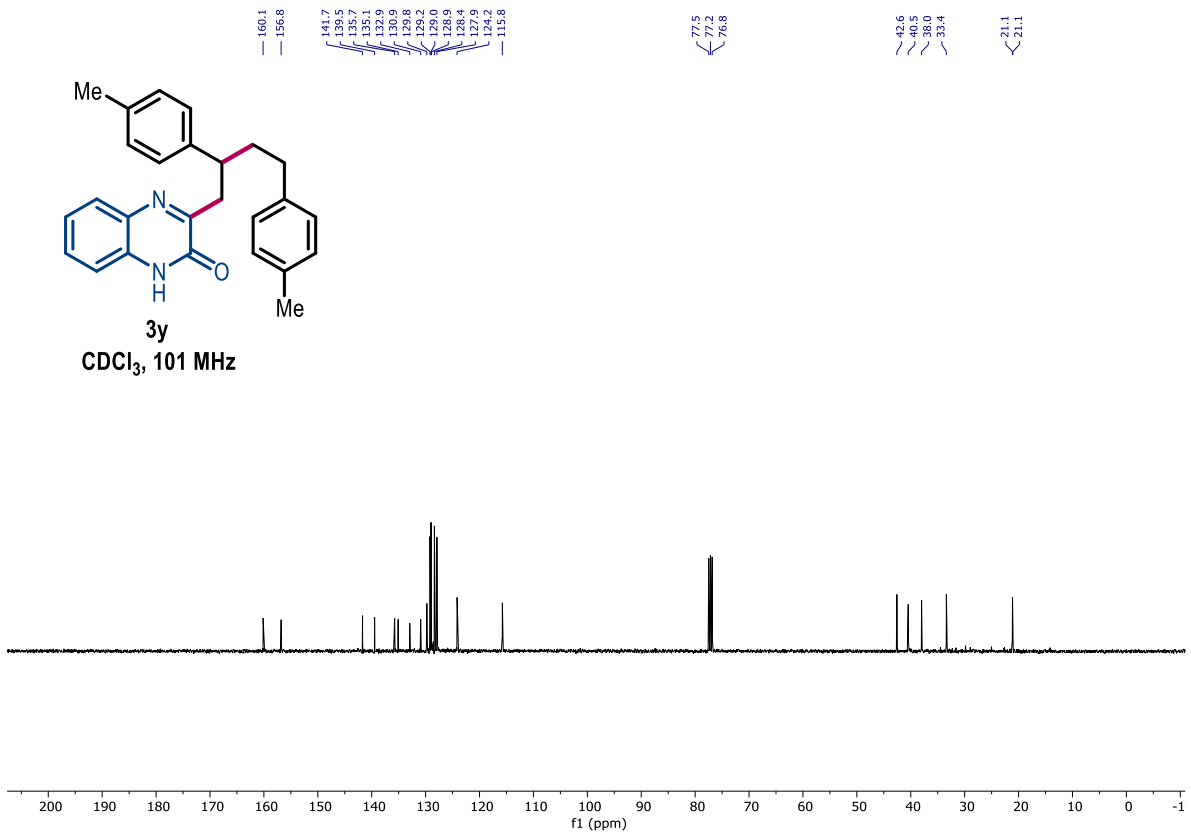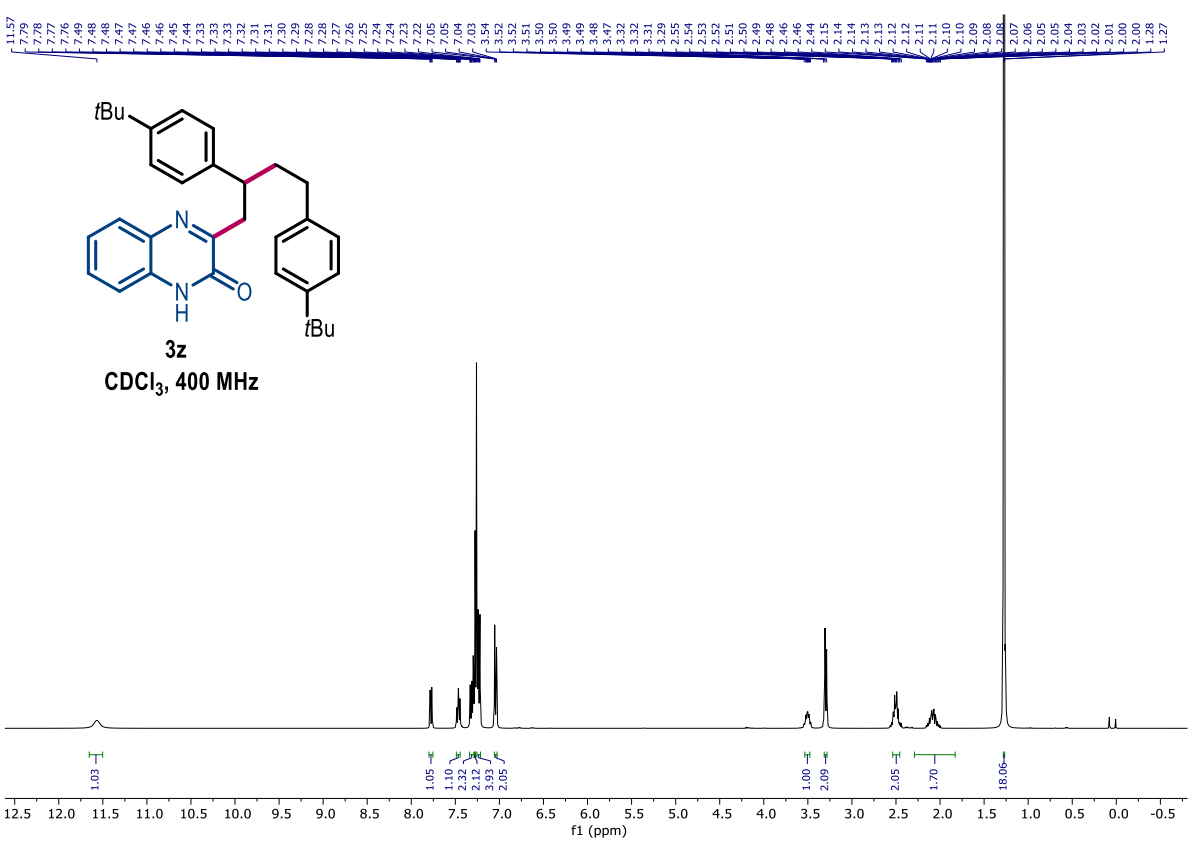

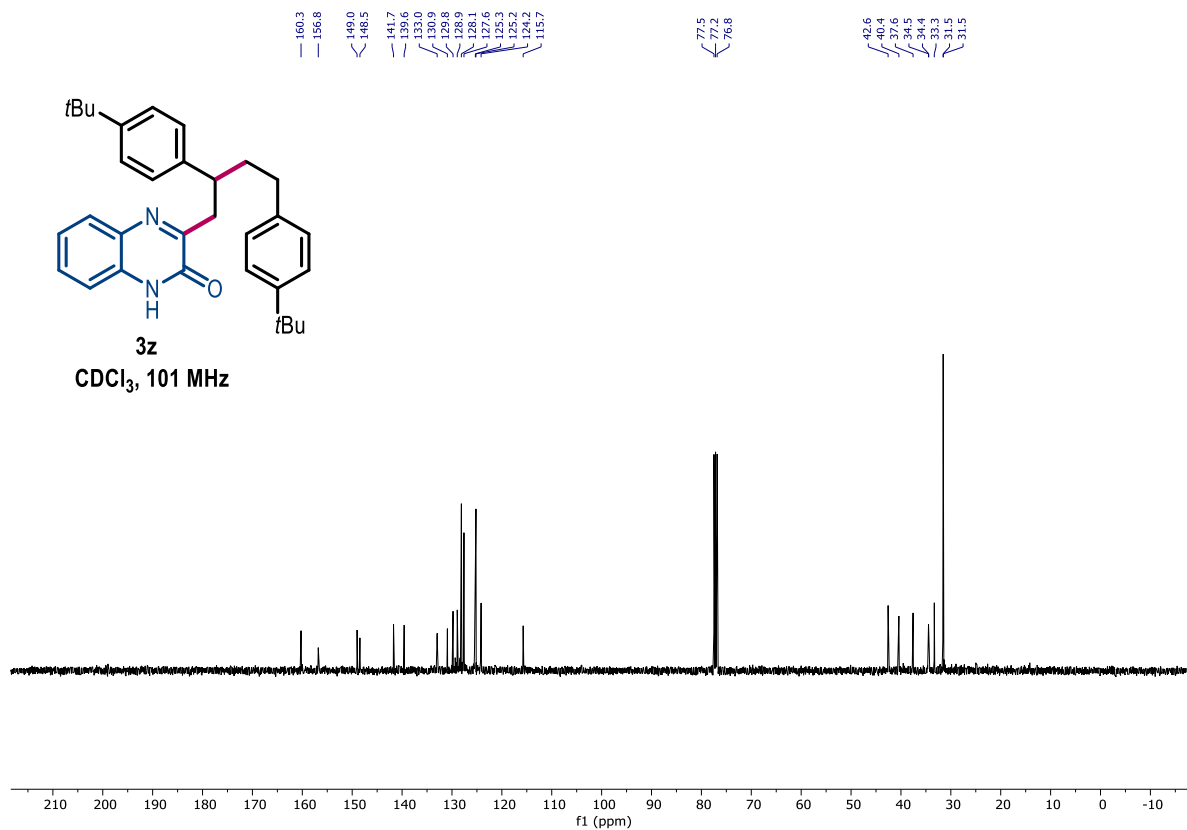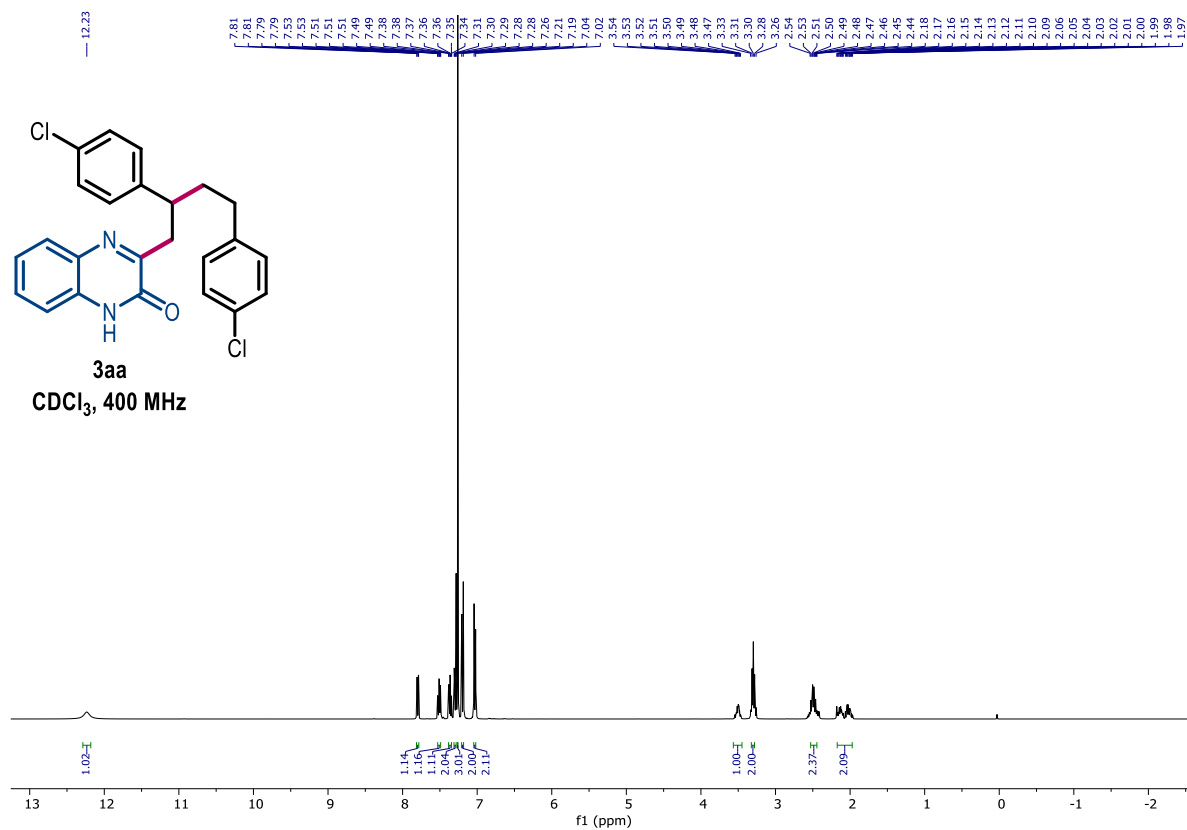

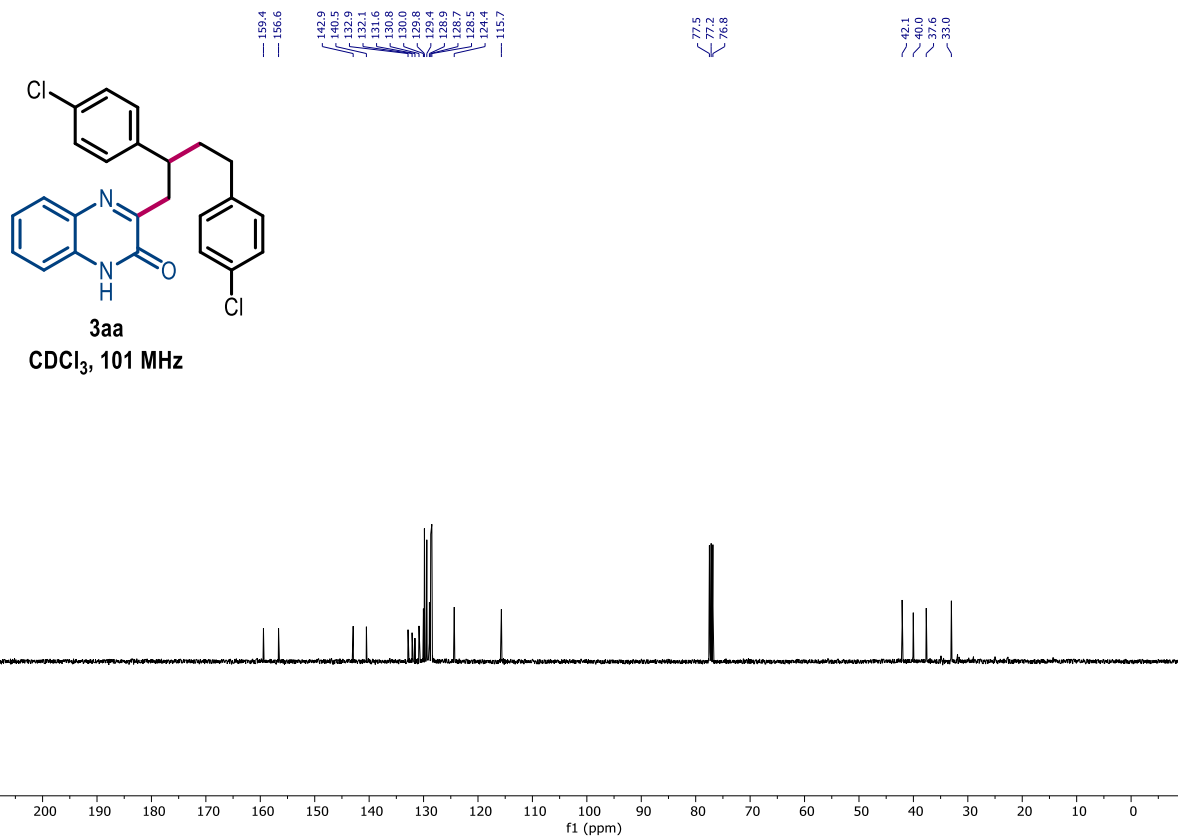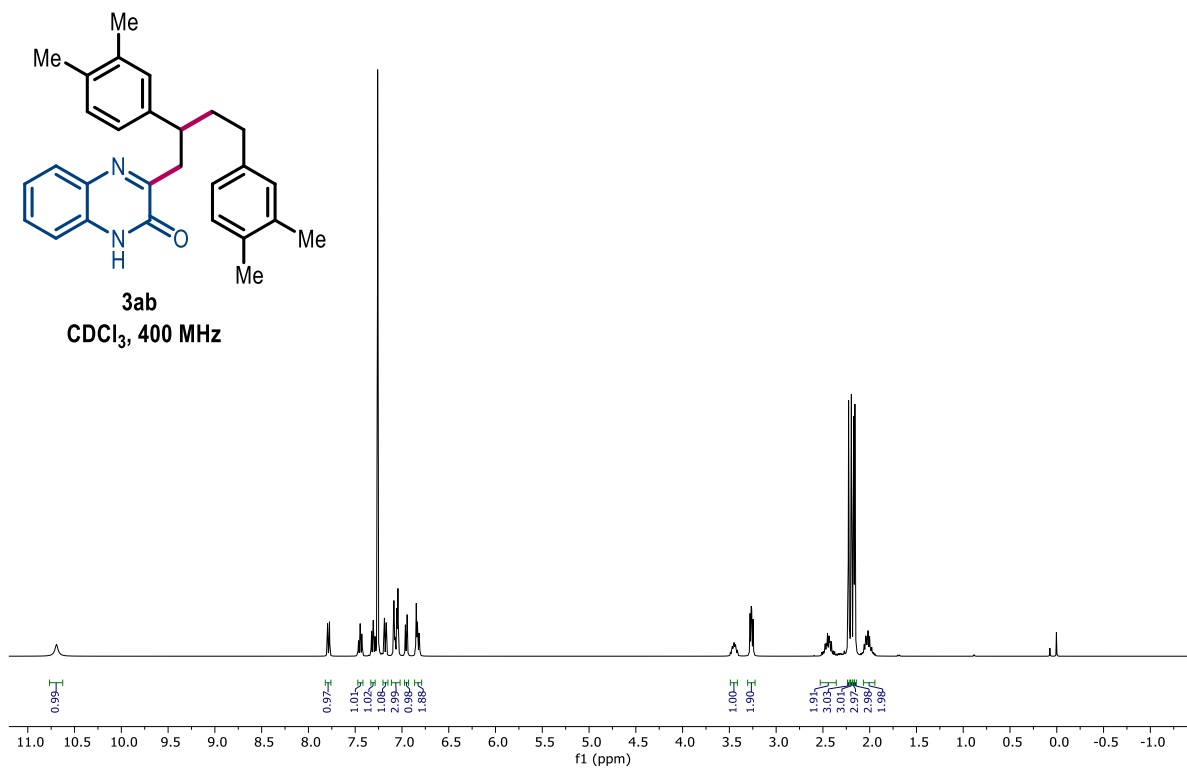

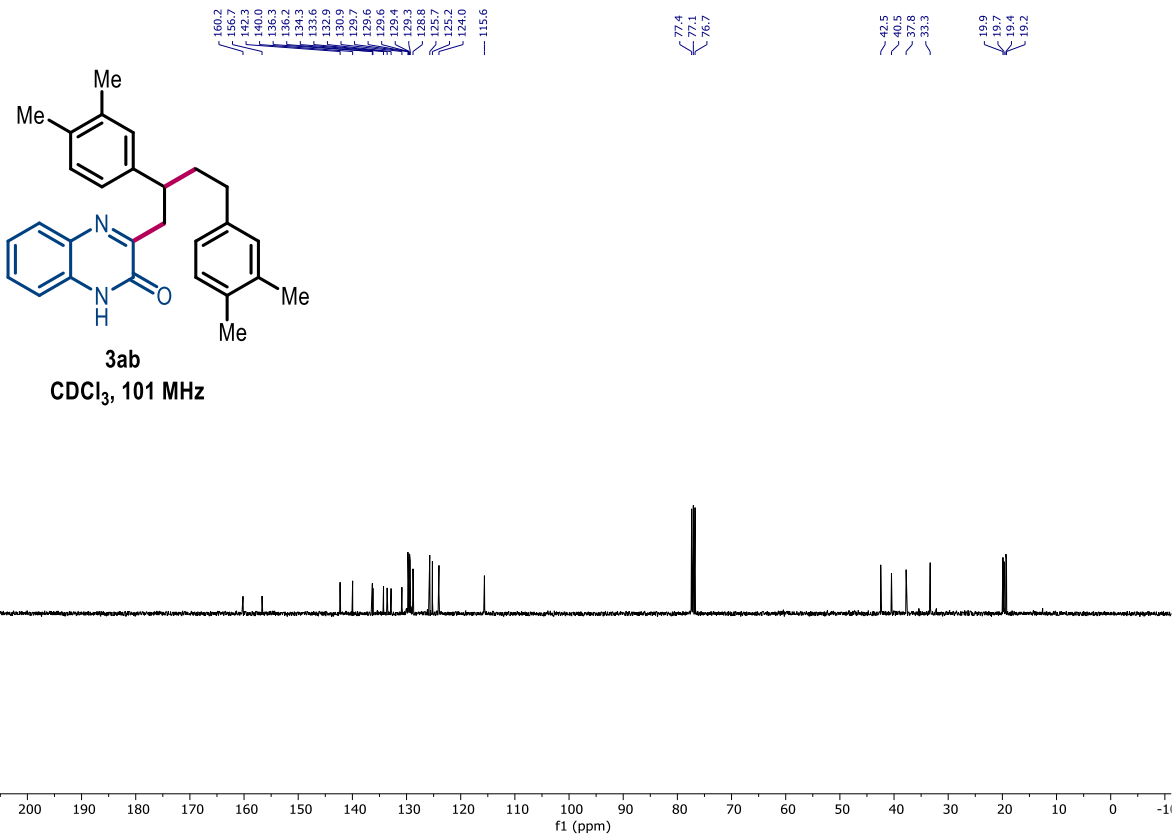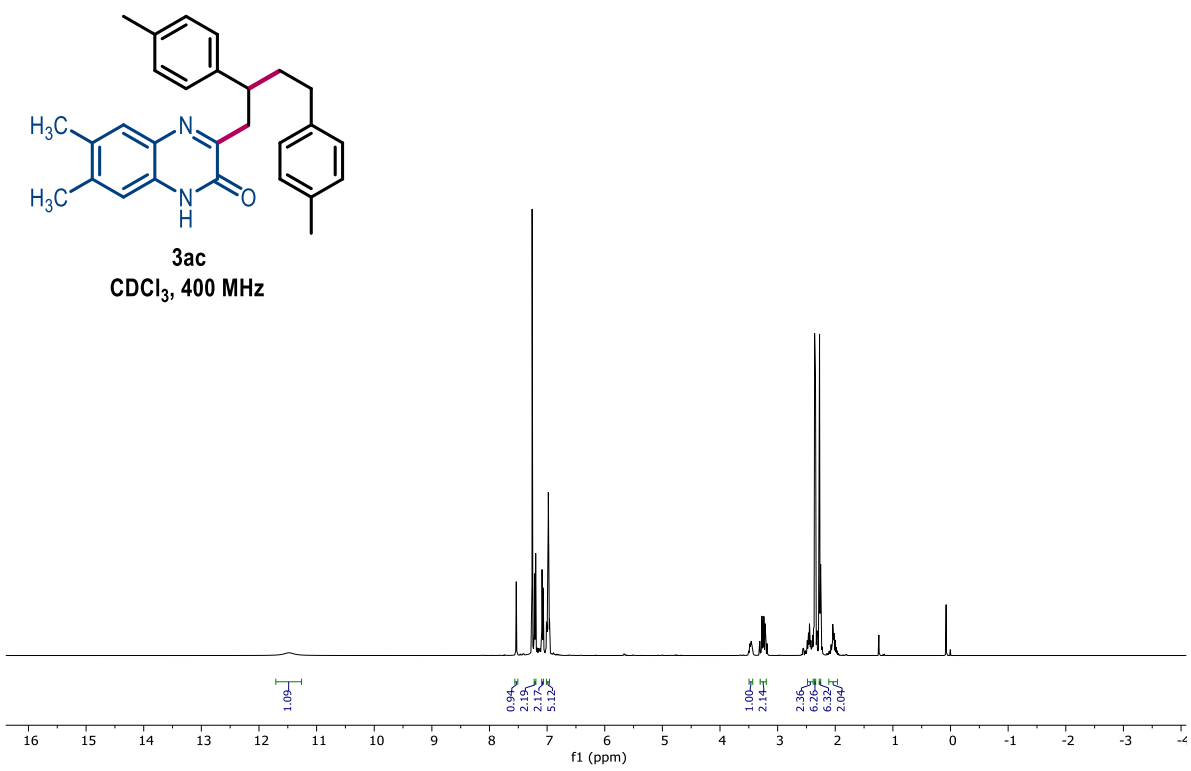



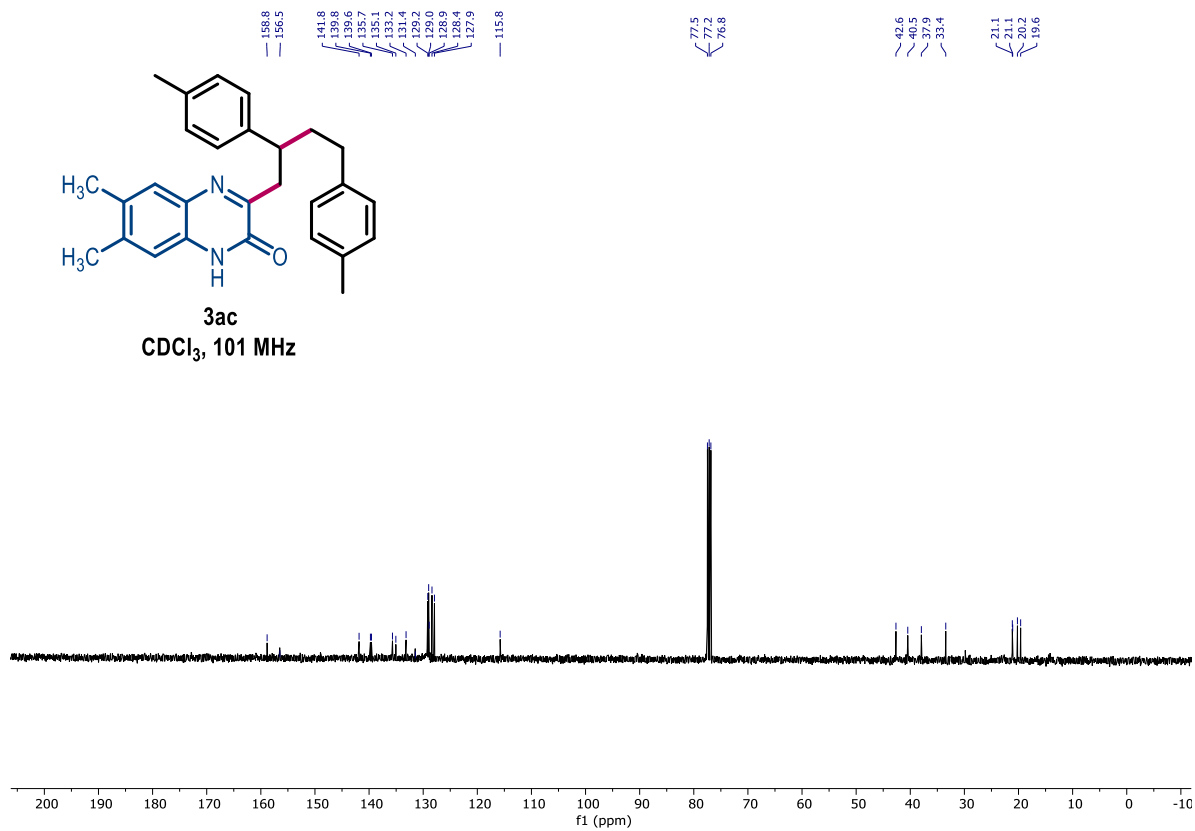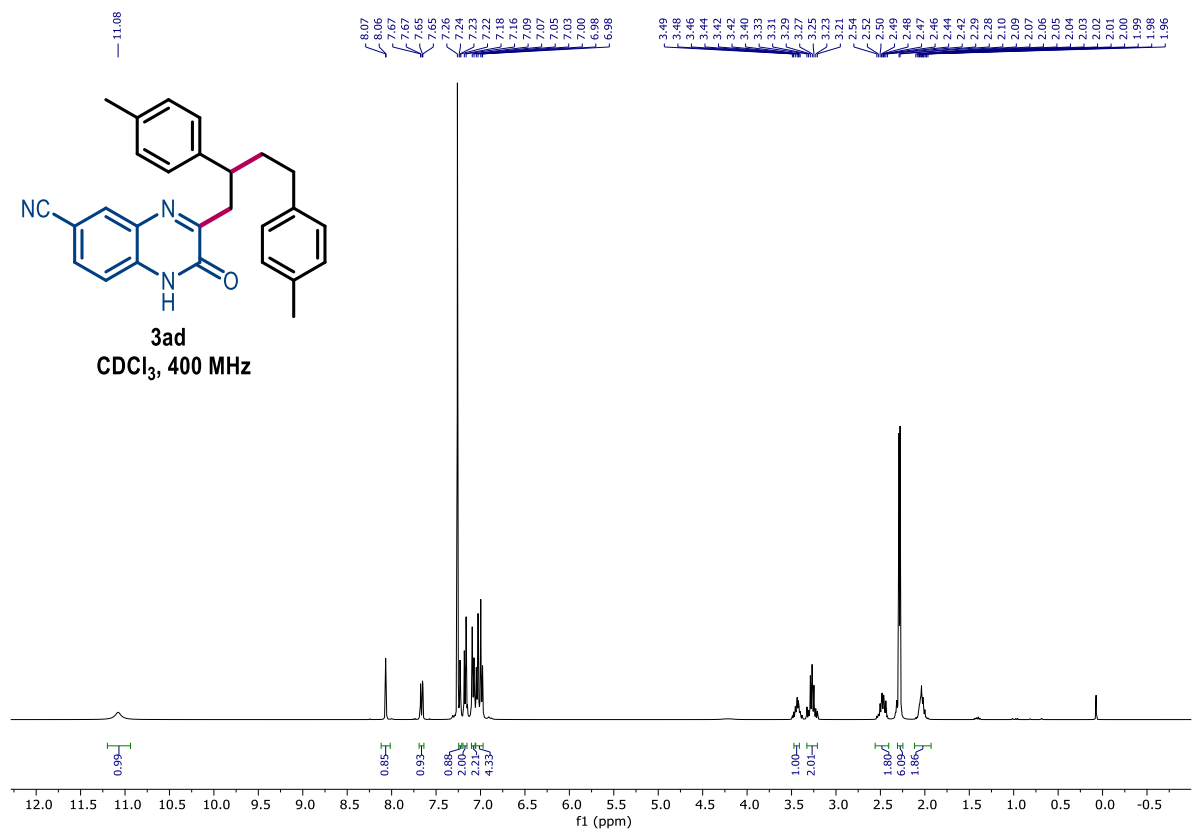

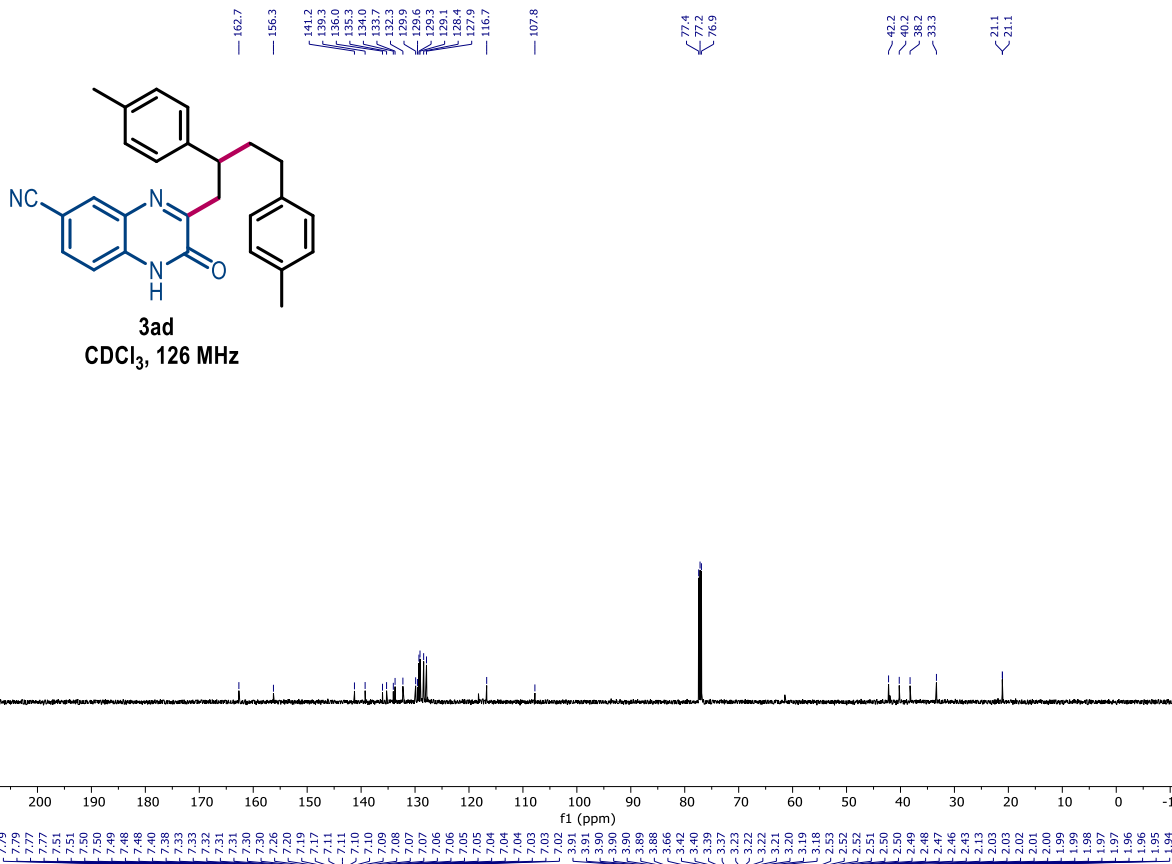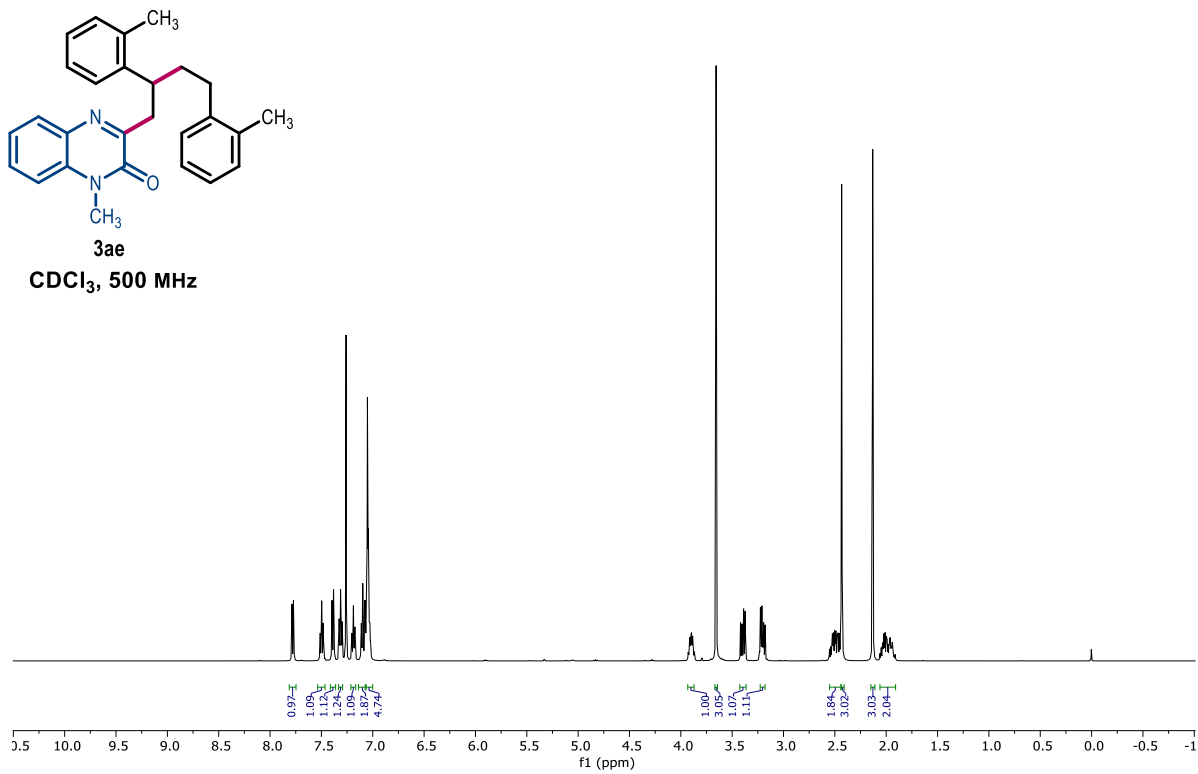

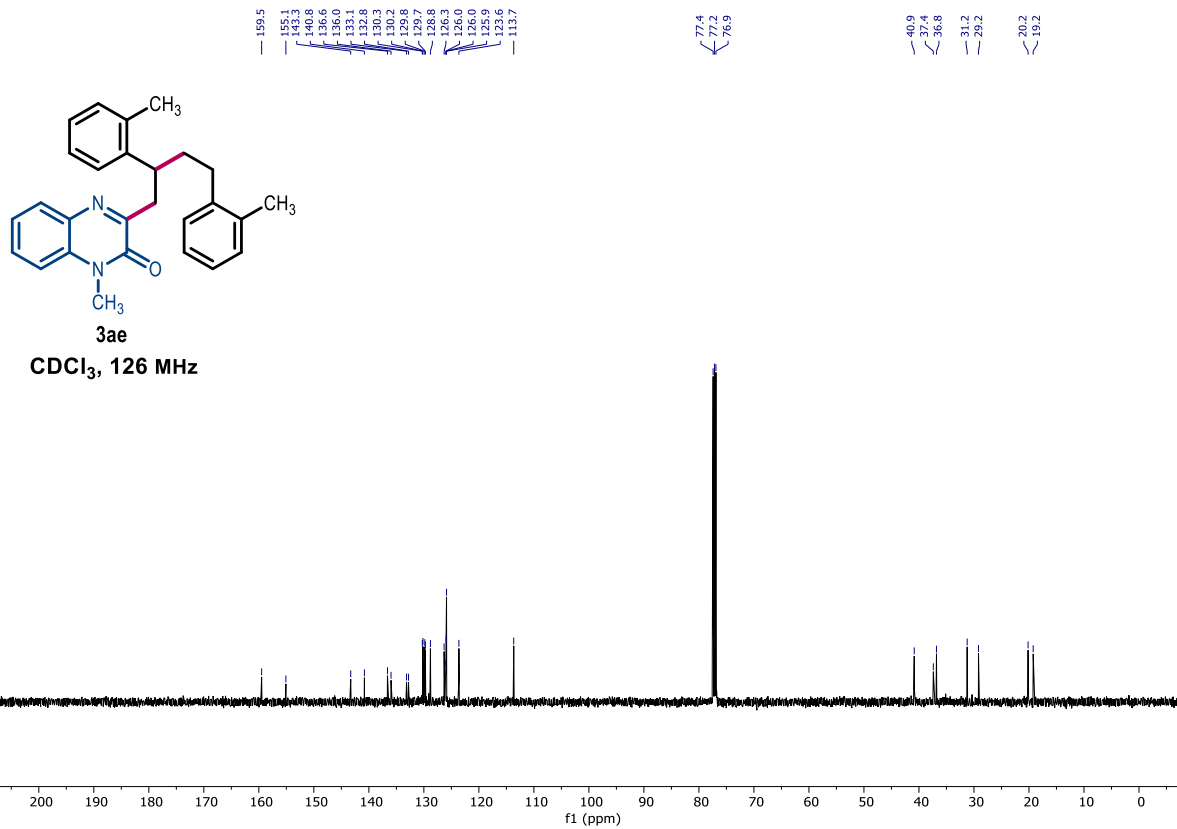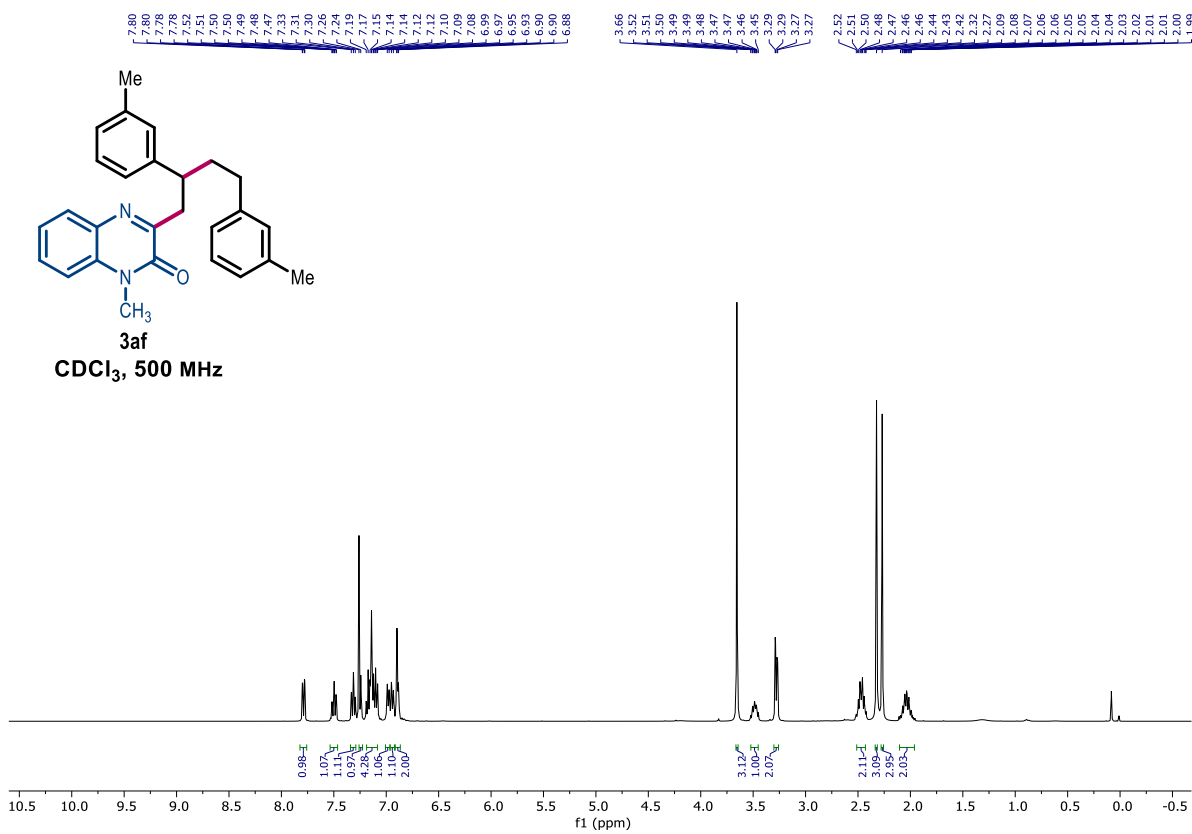

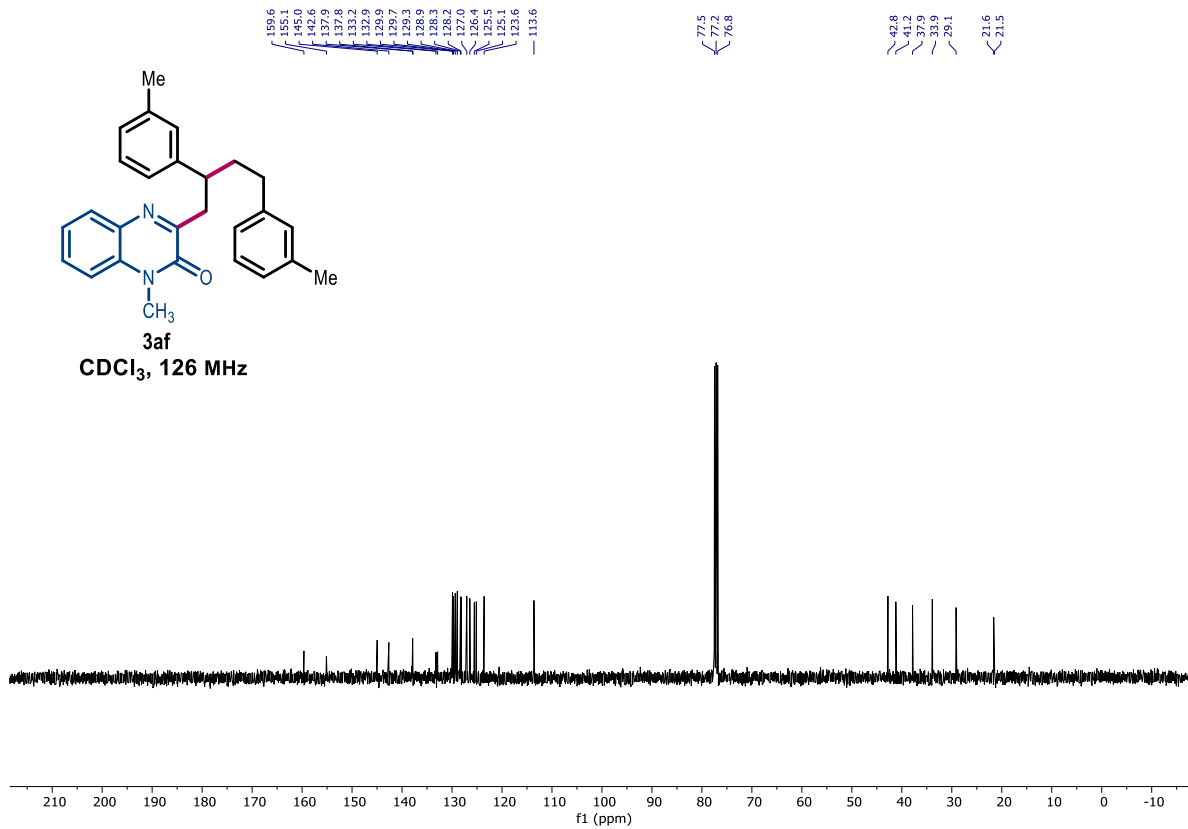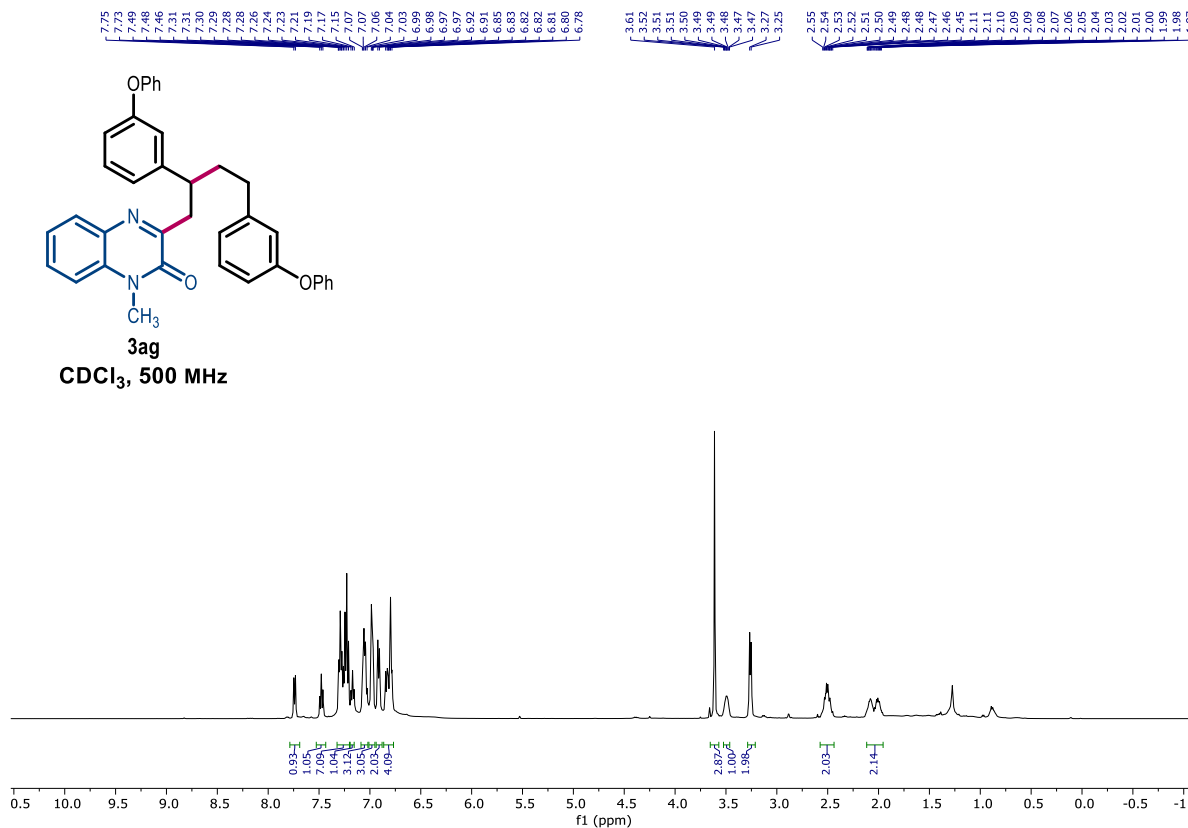

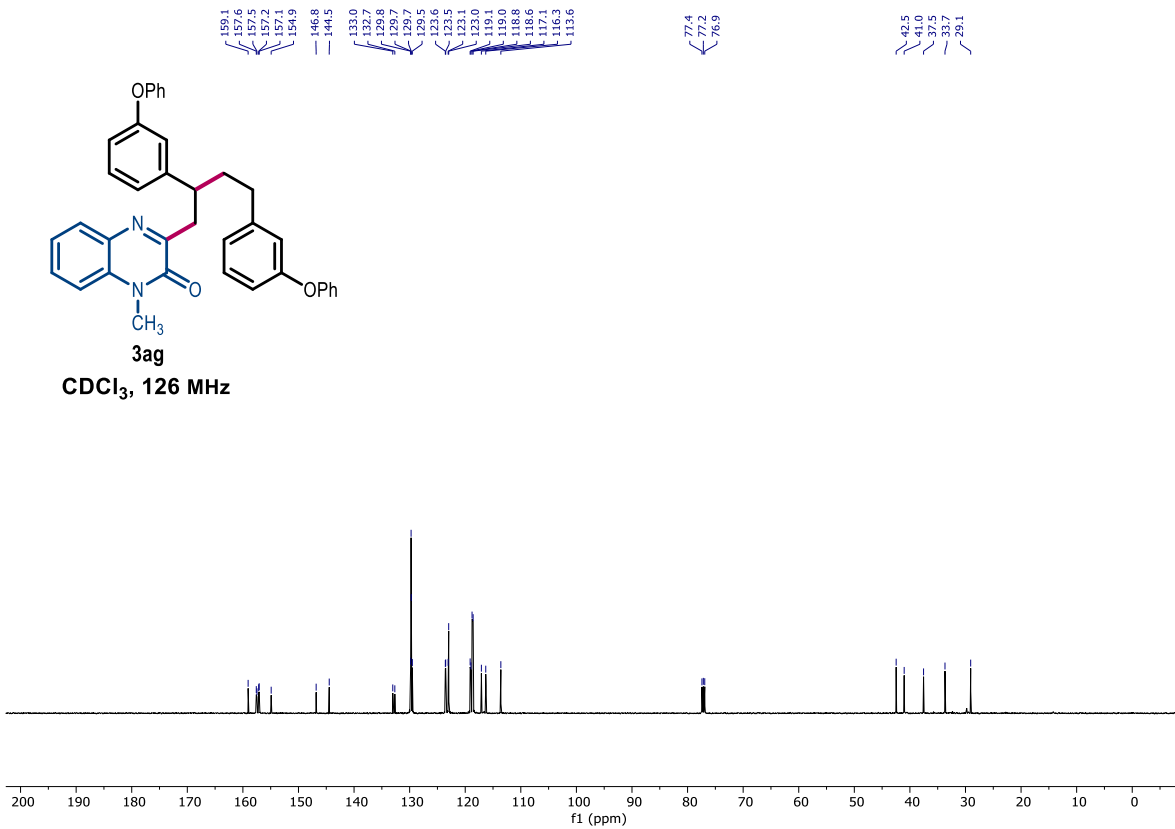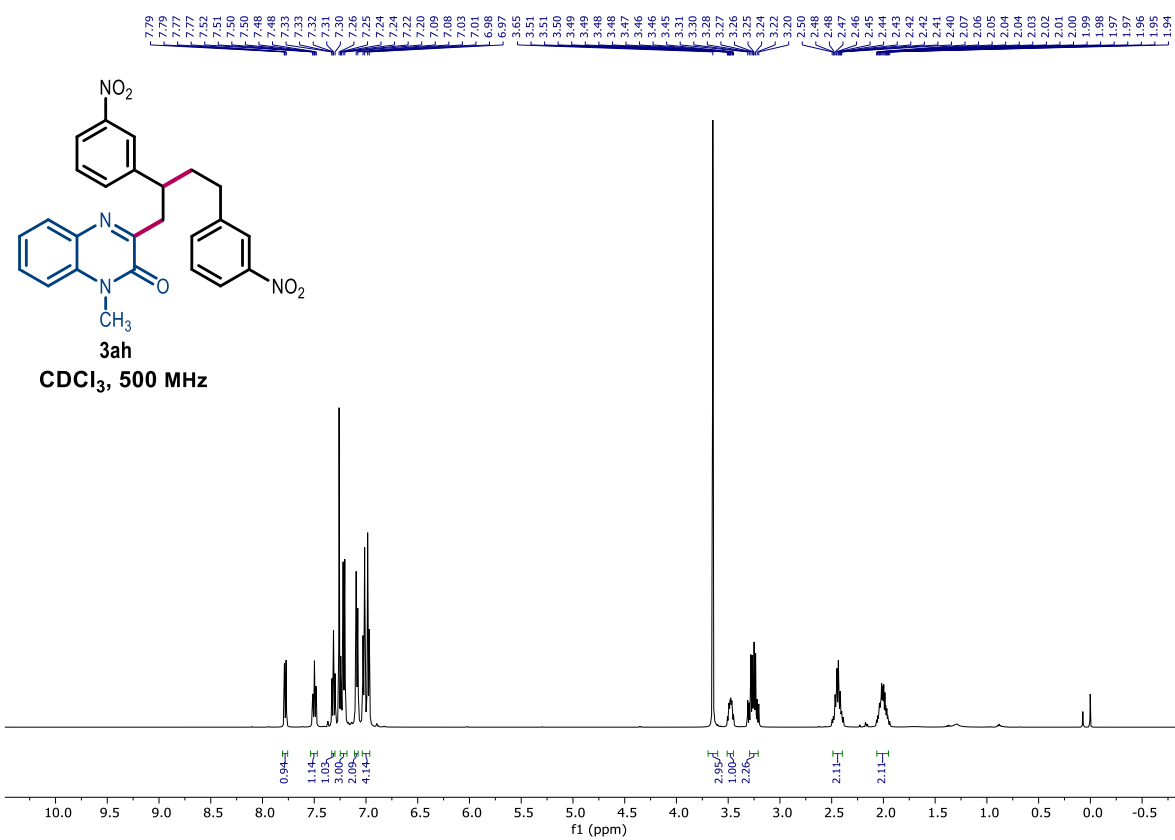

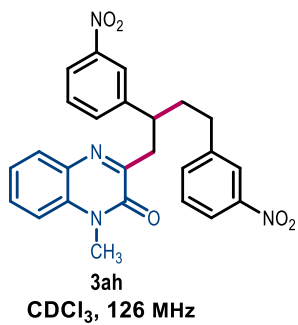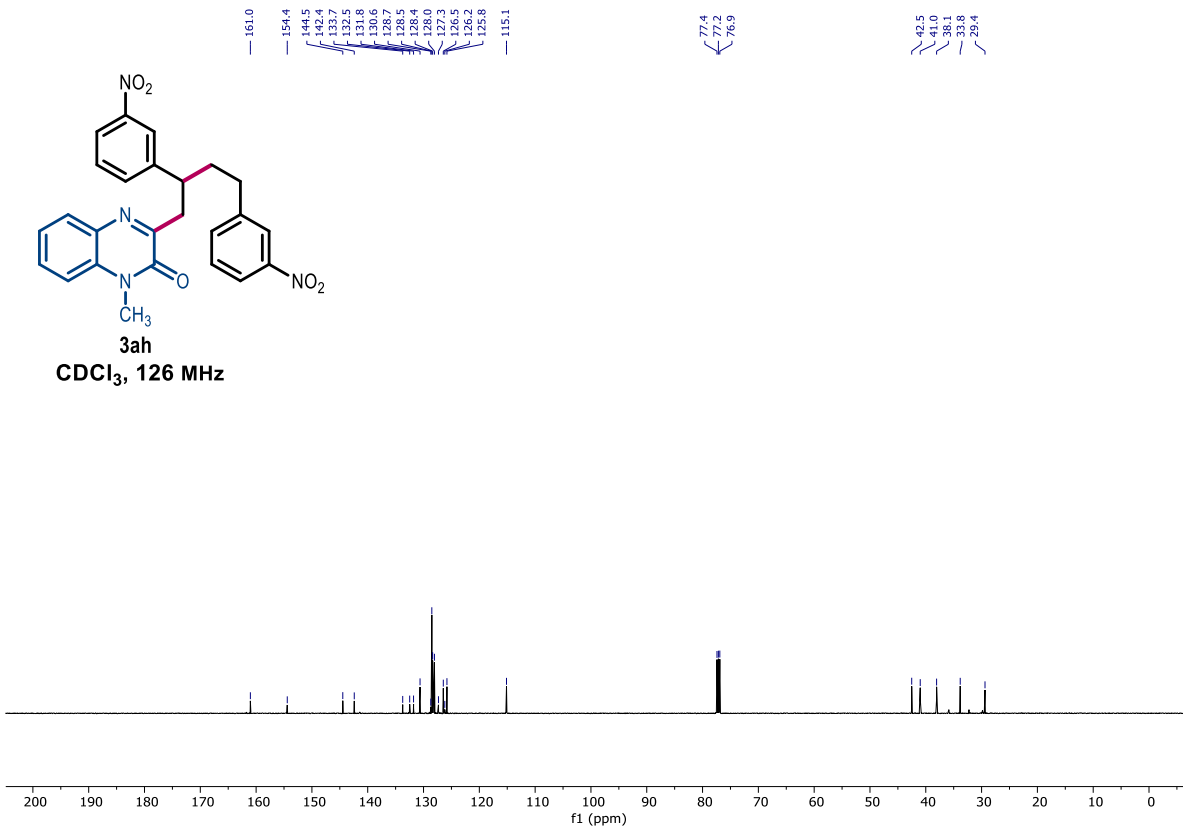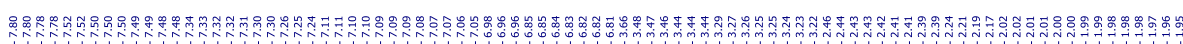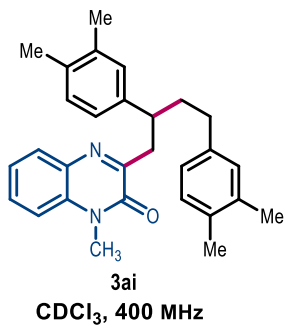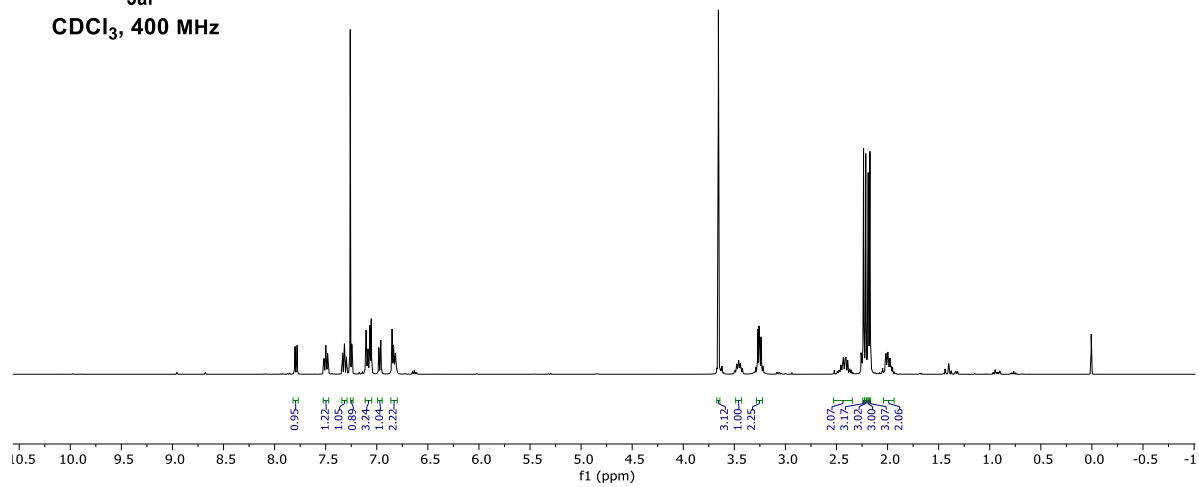

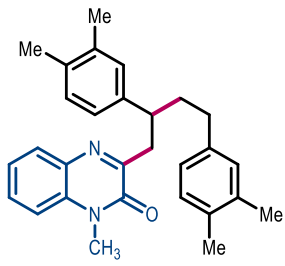

**3ai**  
CDCl<sub>3</sub>, 126 MHz

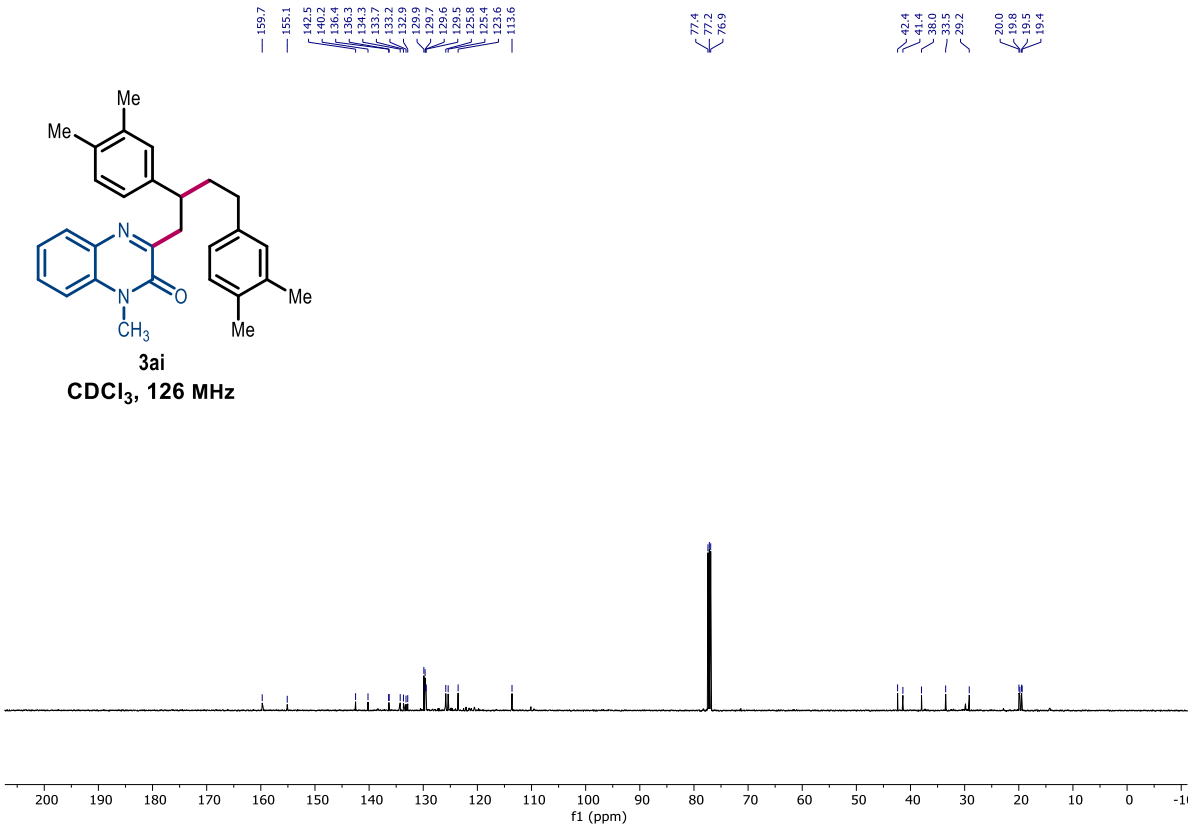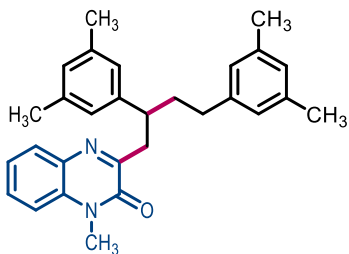

**3aj**  
CDCl<sub>3</sub>, 500 MHz

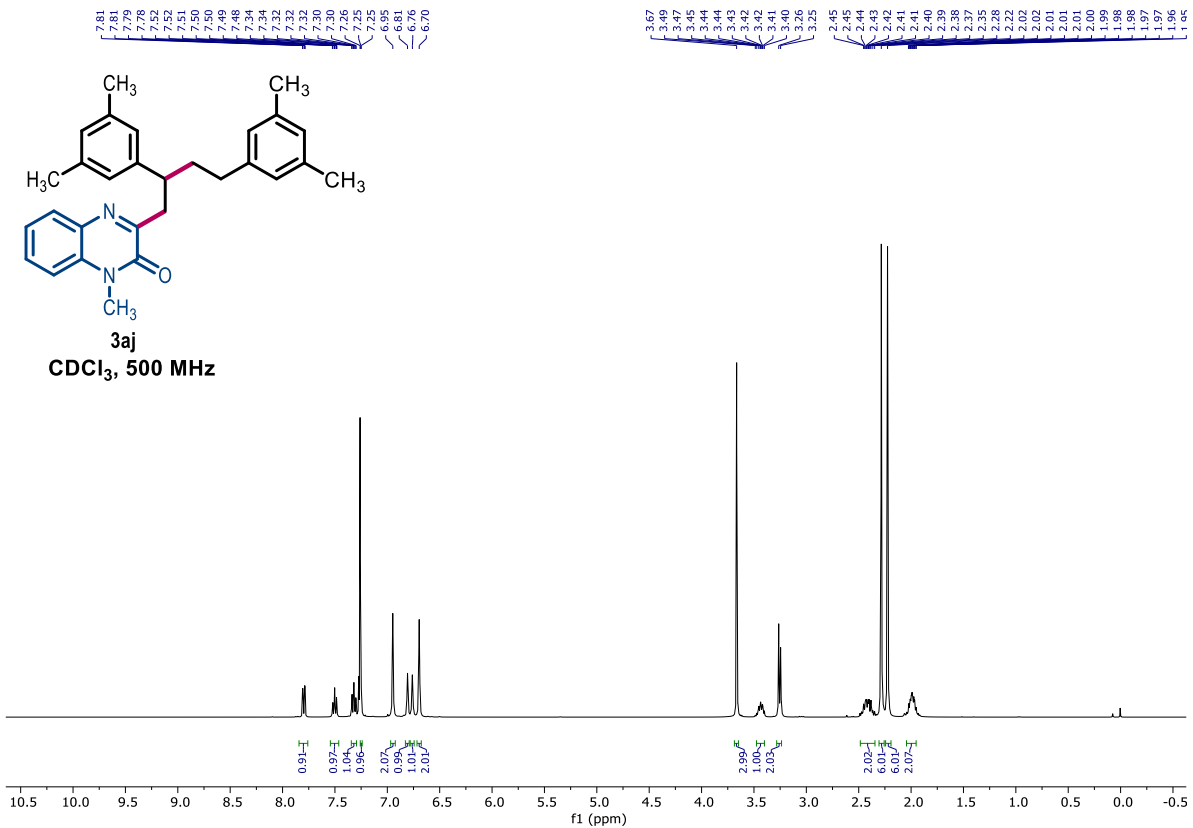

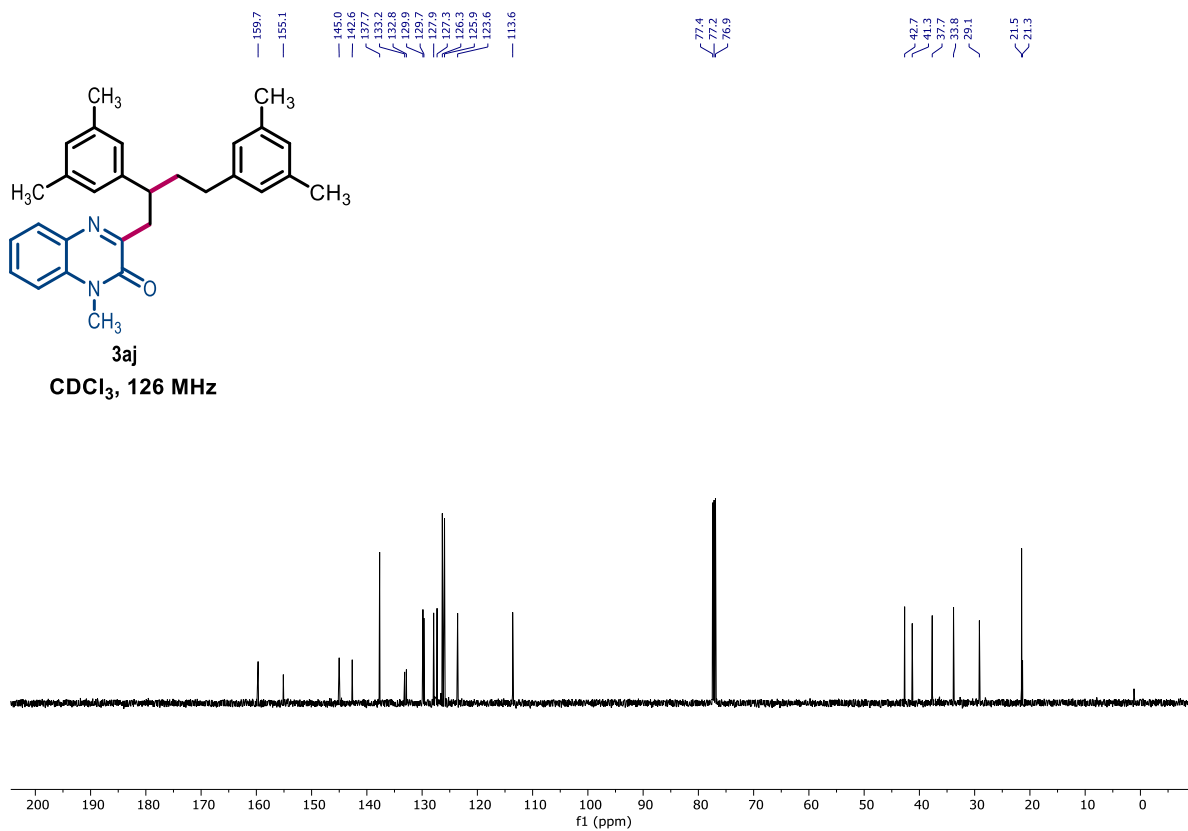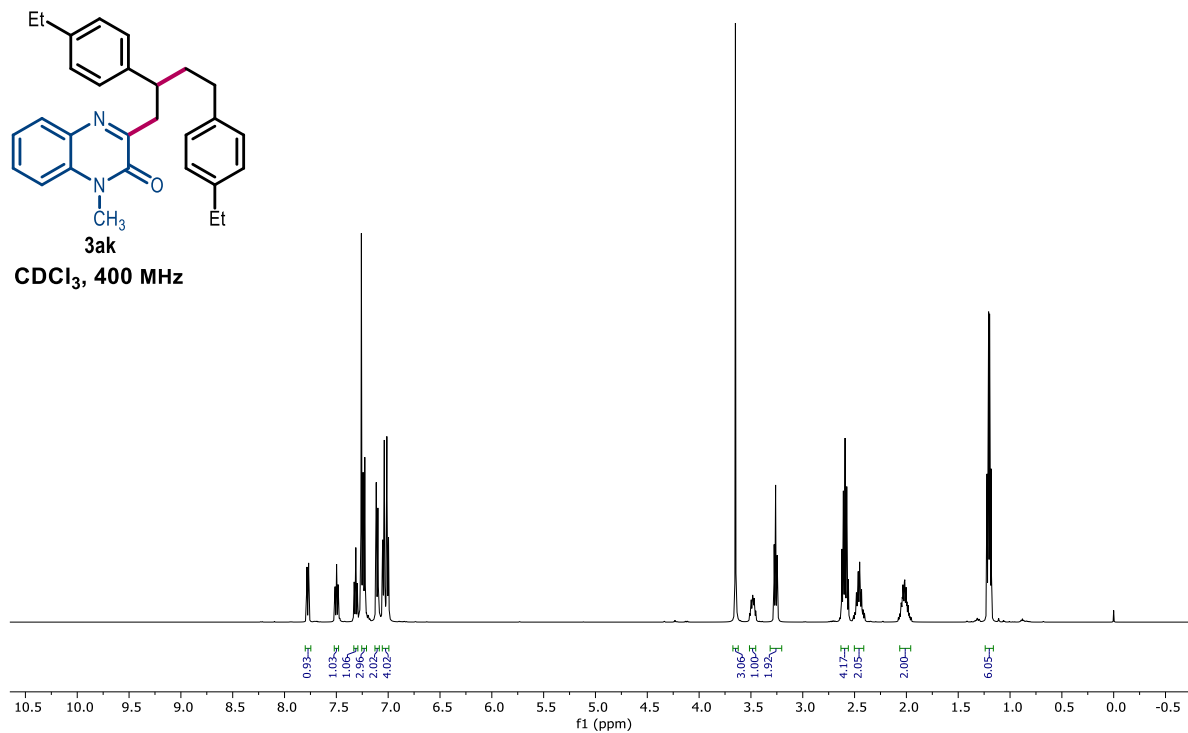



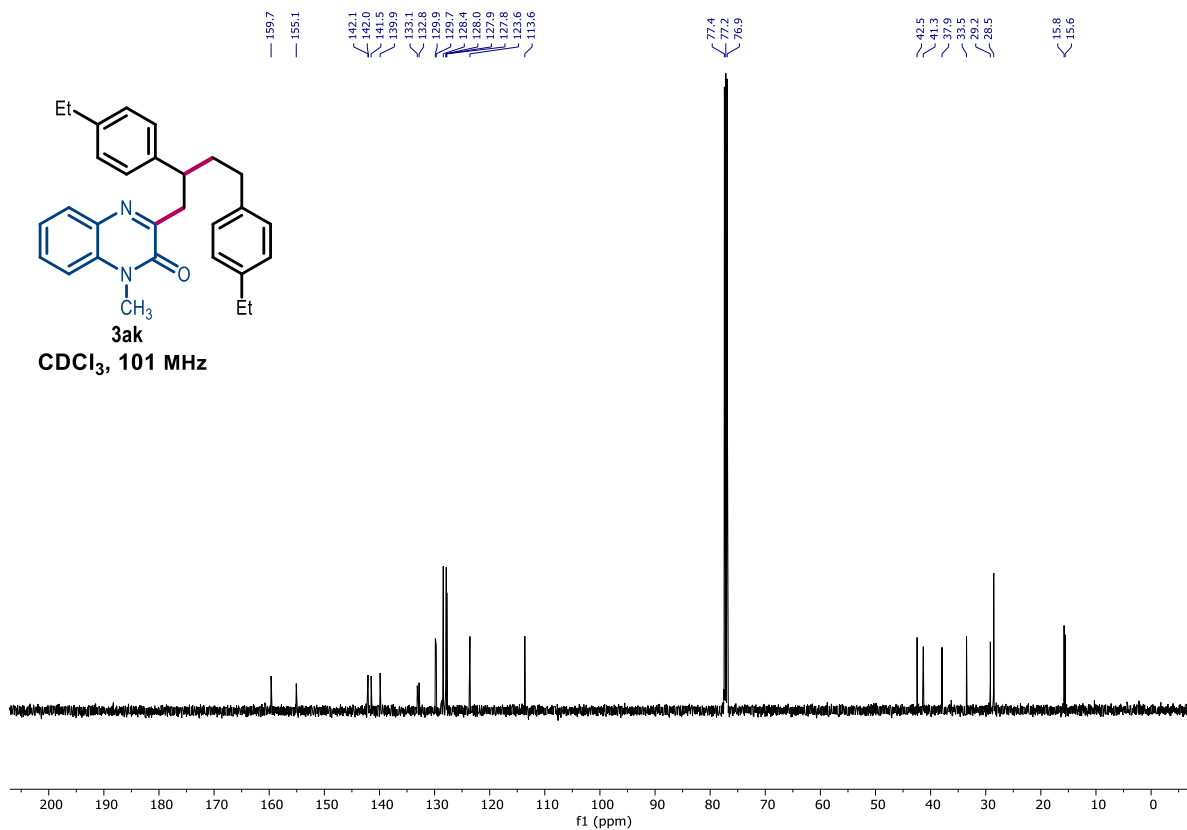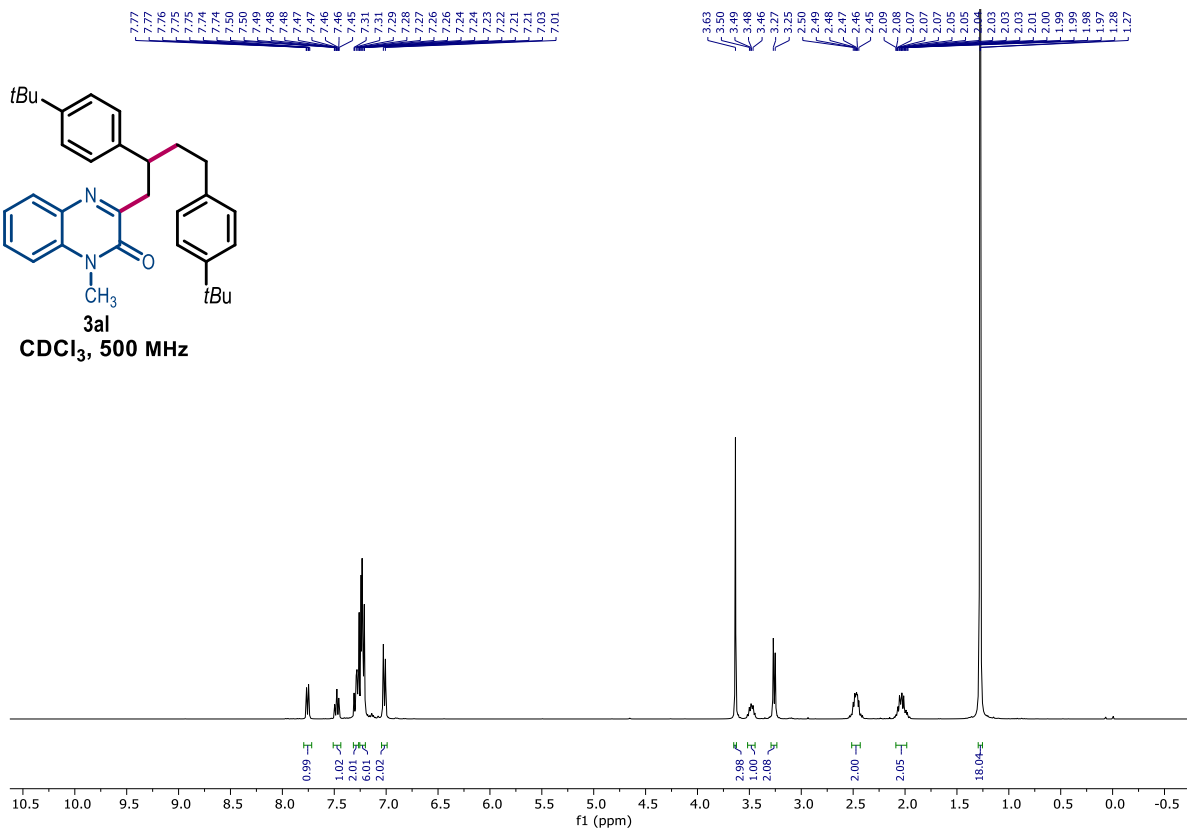

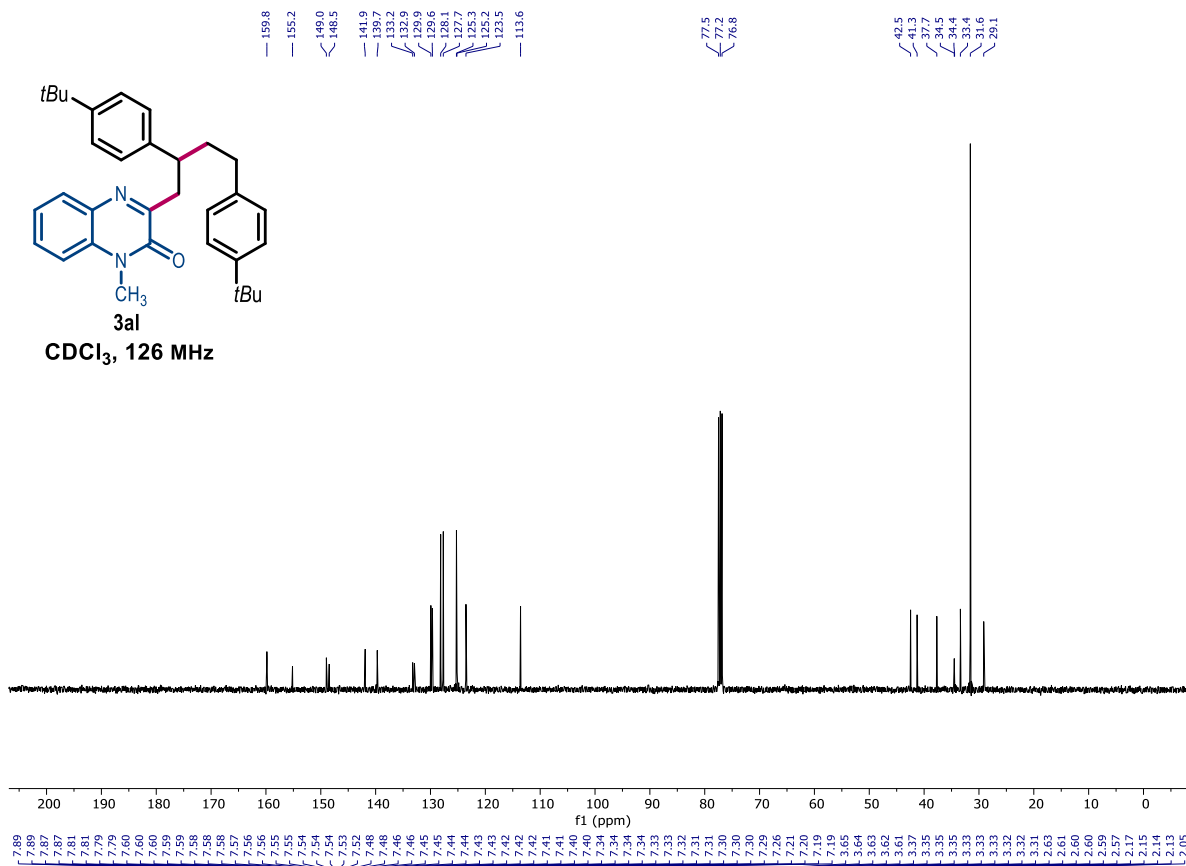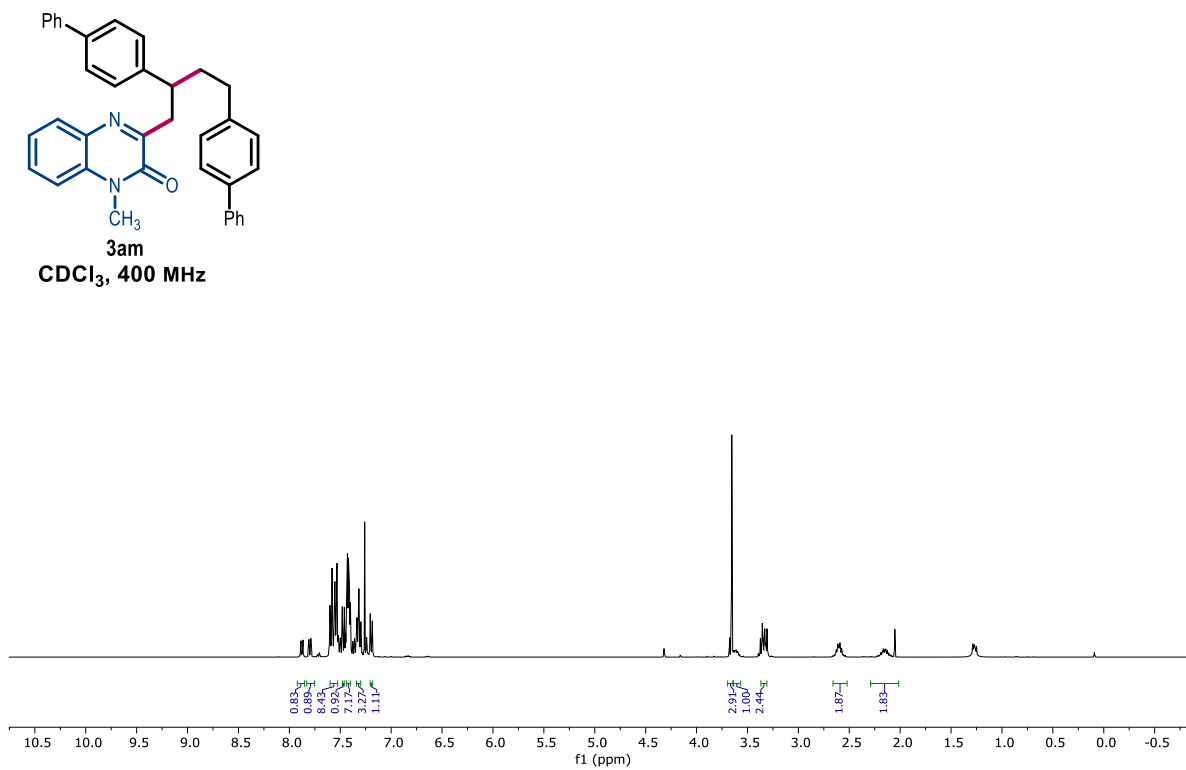

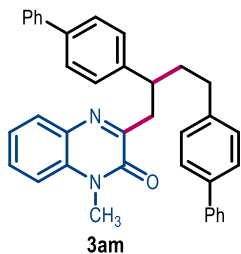

CDCl<sub>3</sub>, 101 MHz

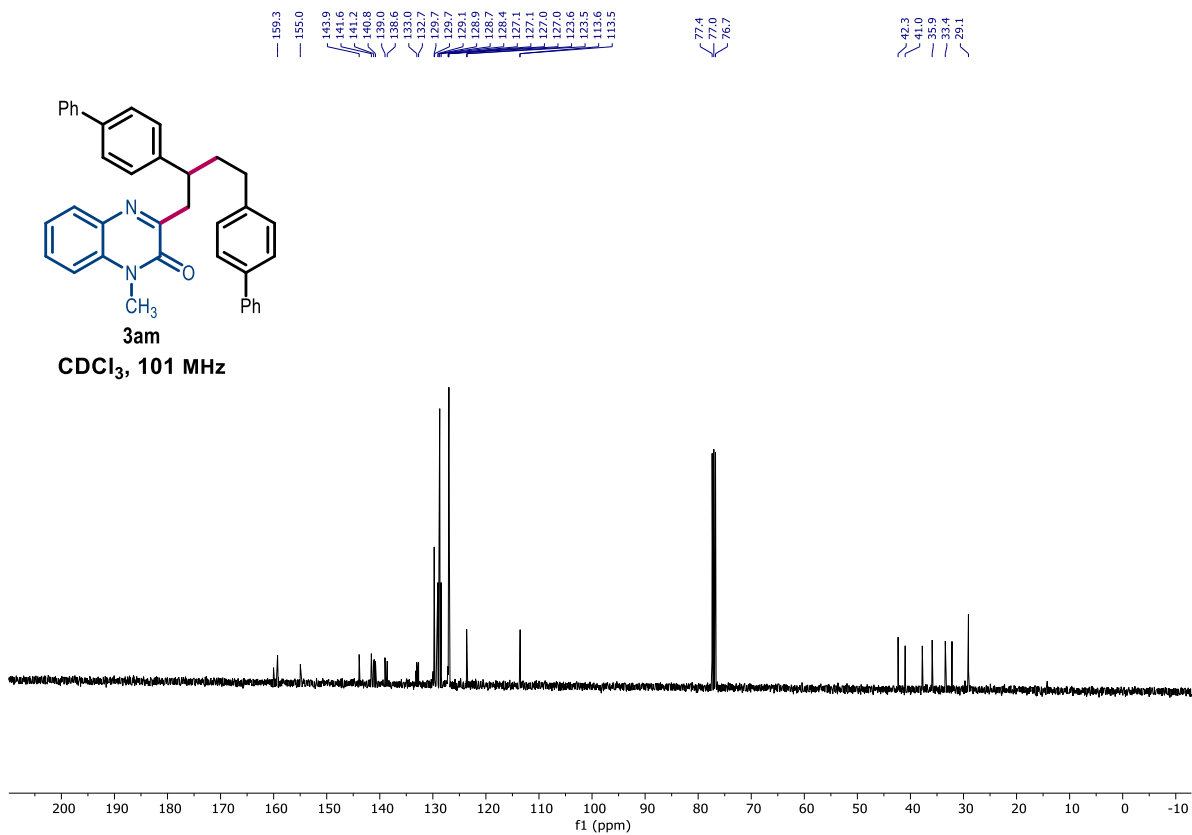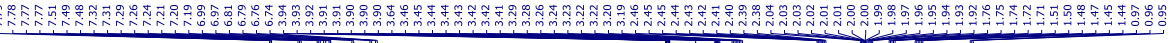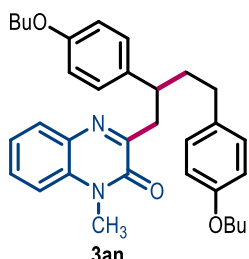

CDCl<sub>3</sub>, 500 MHz

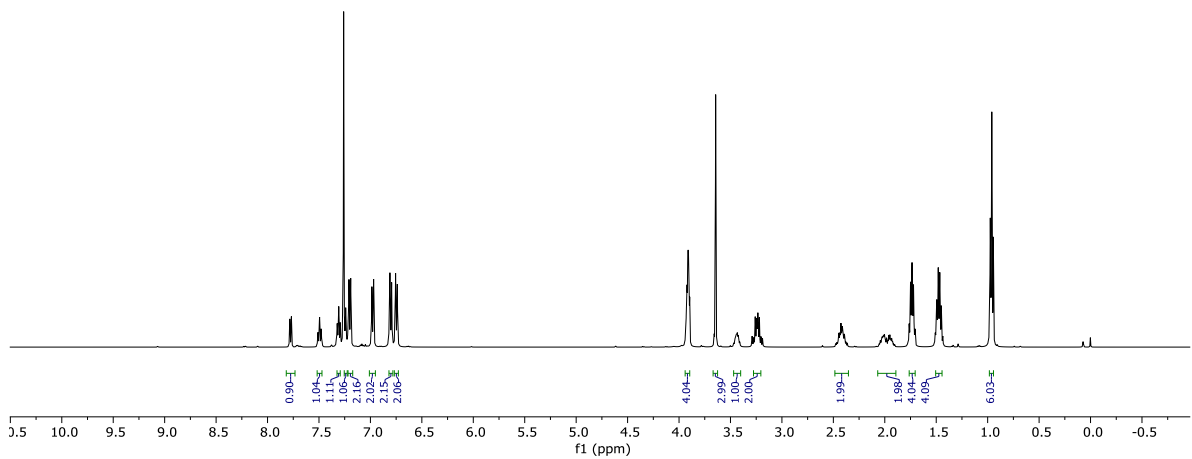

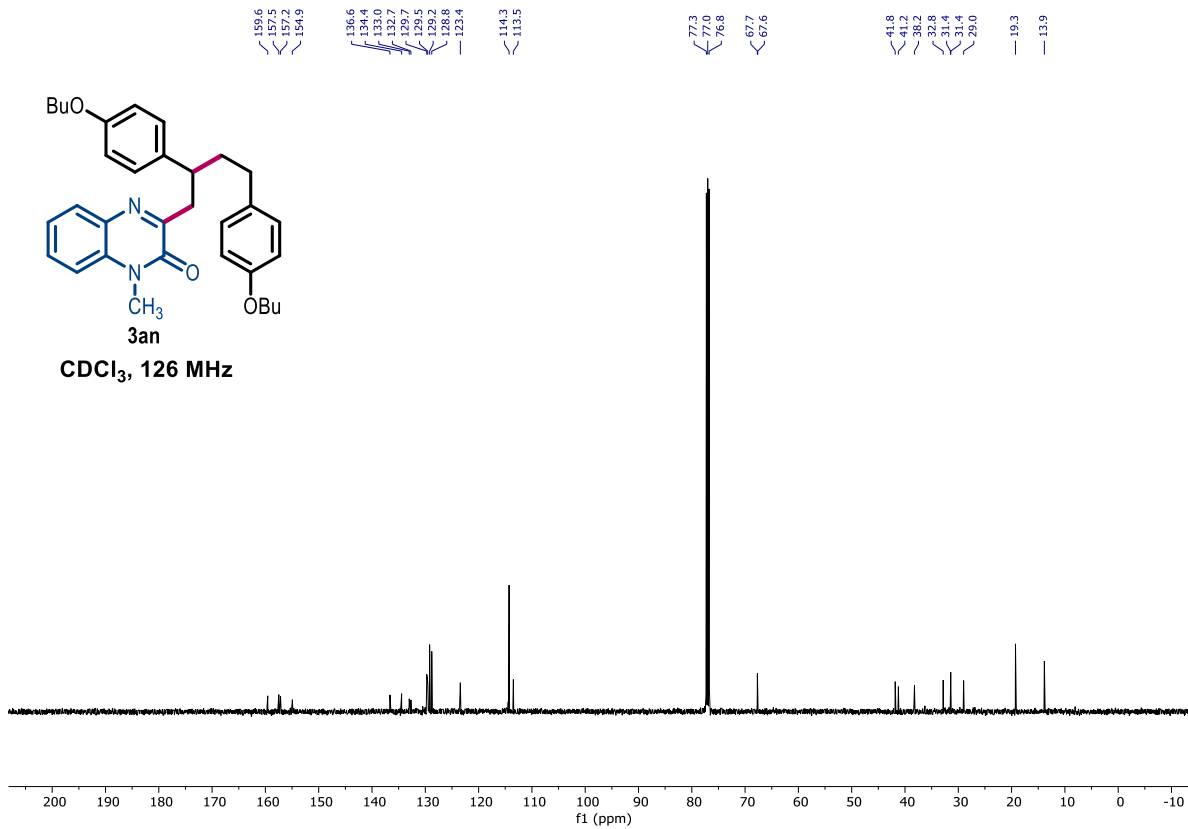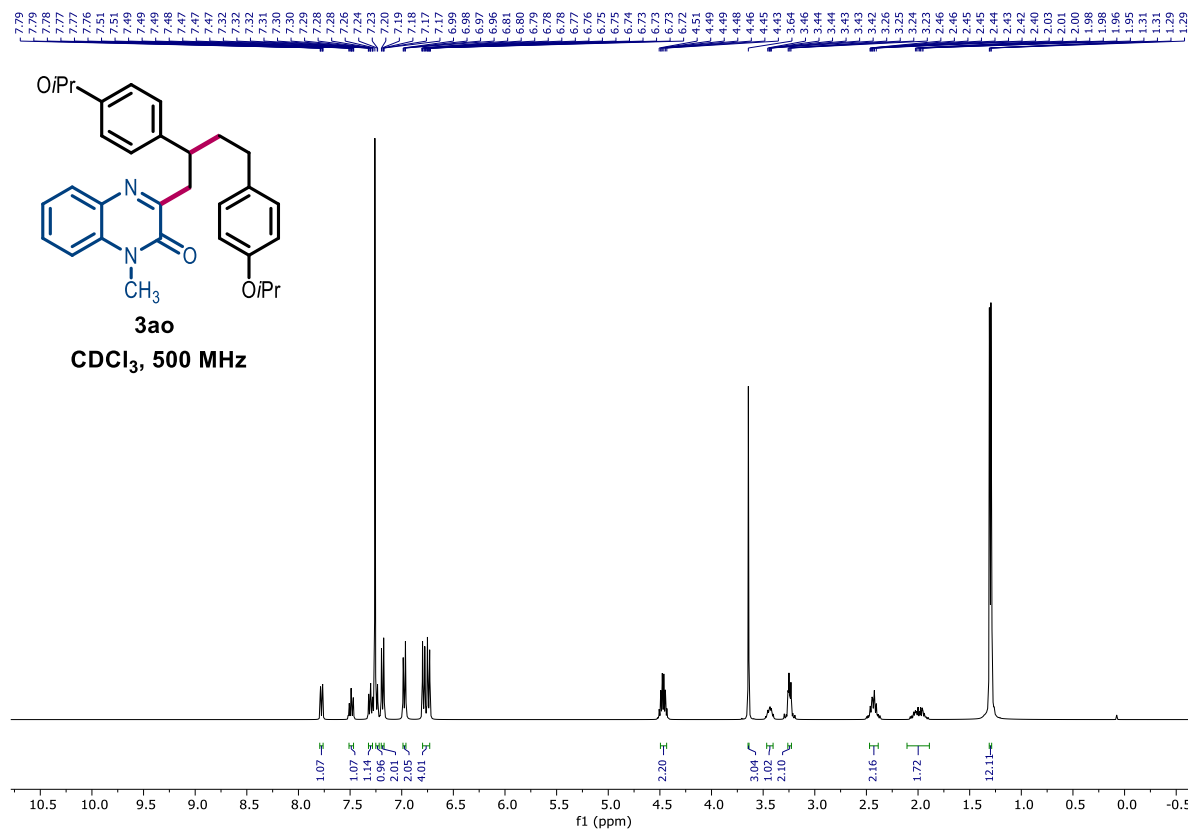

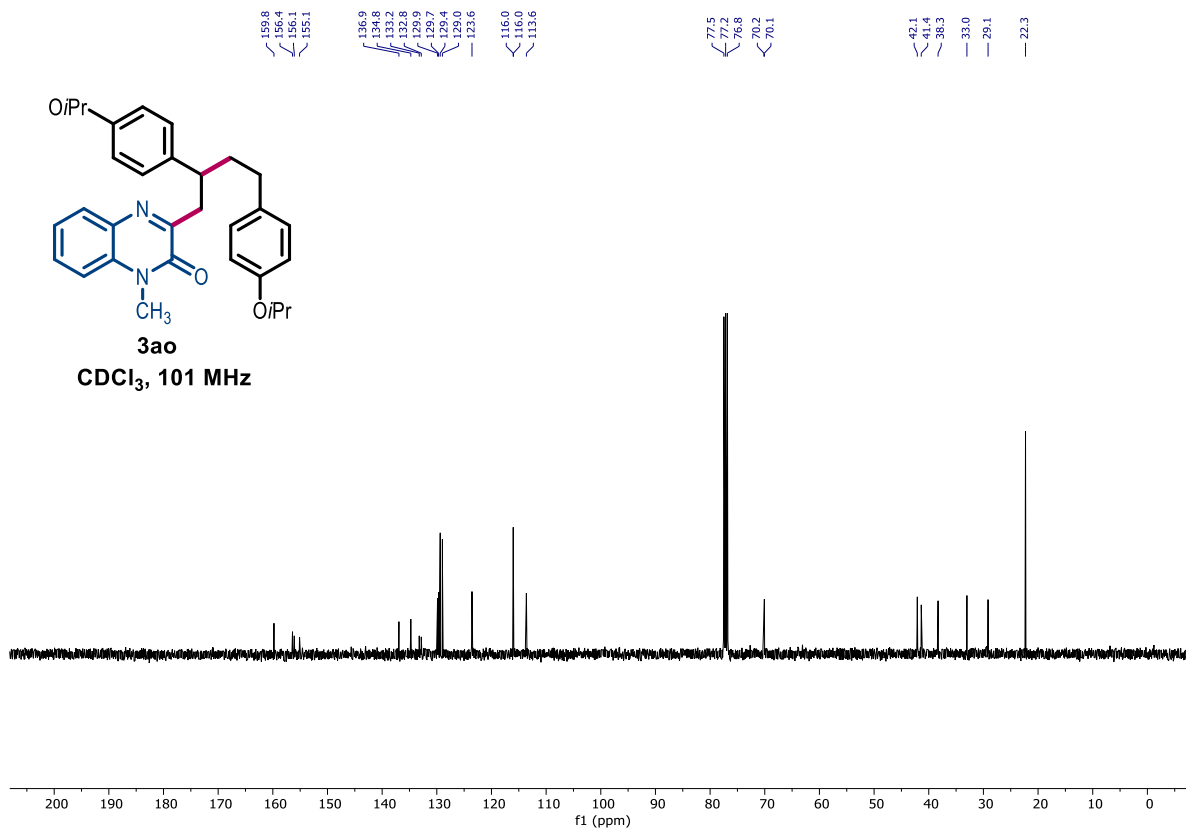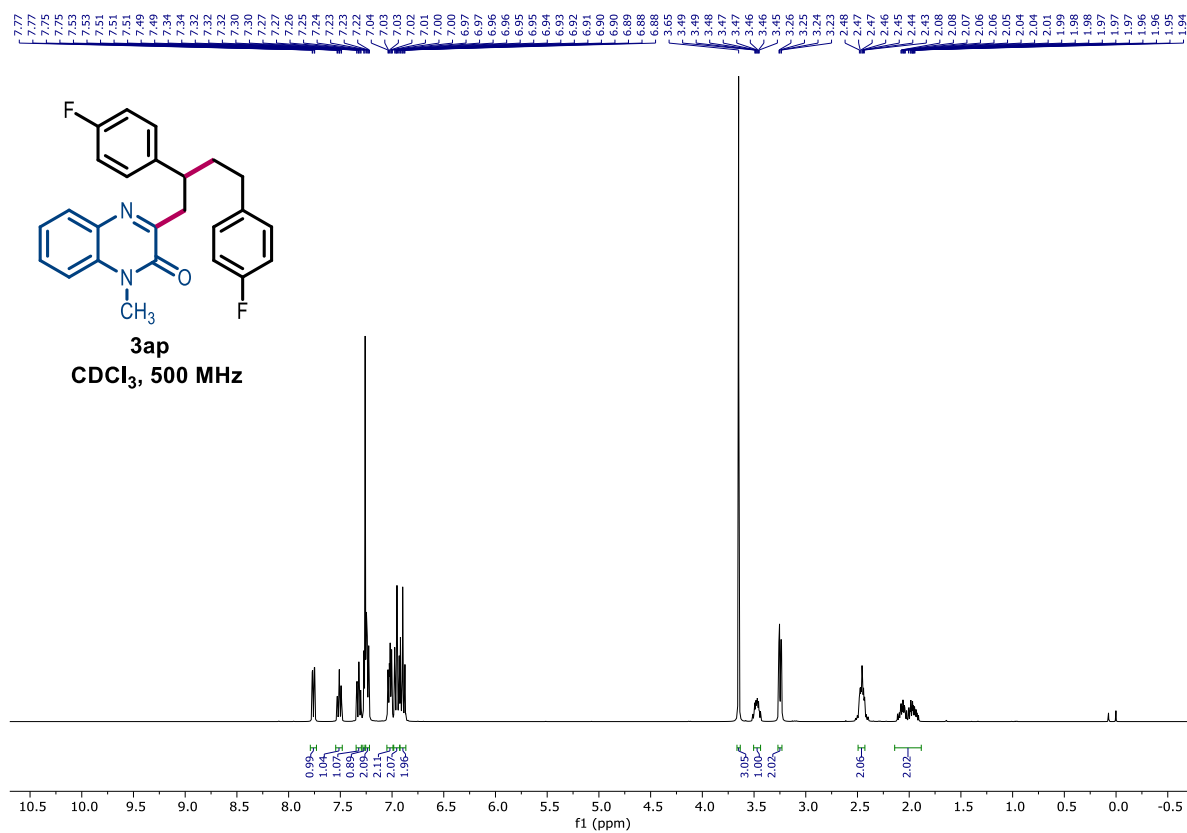

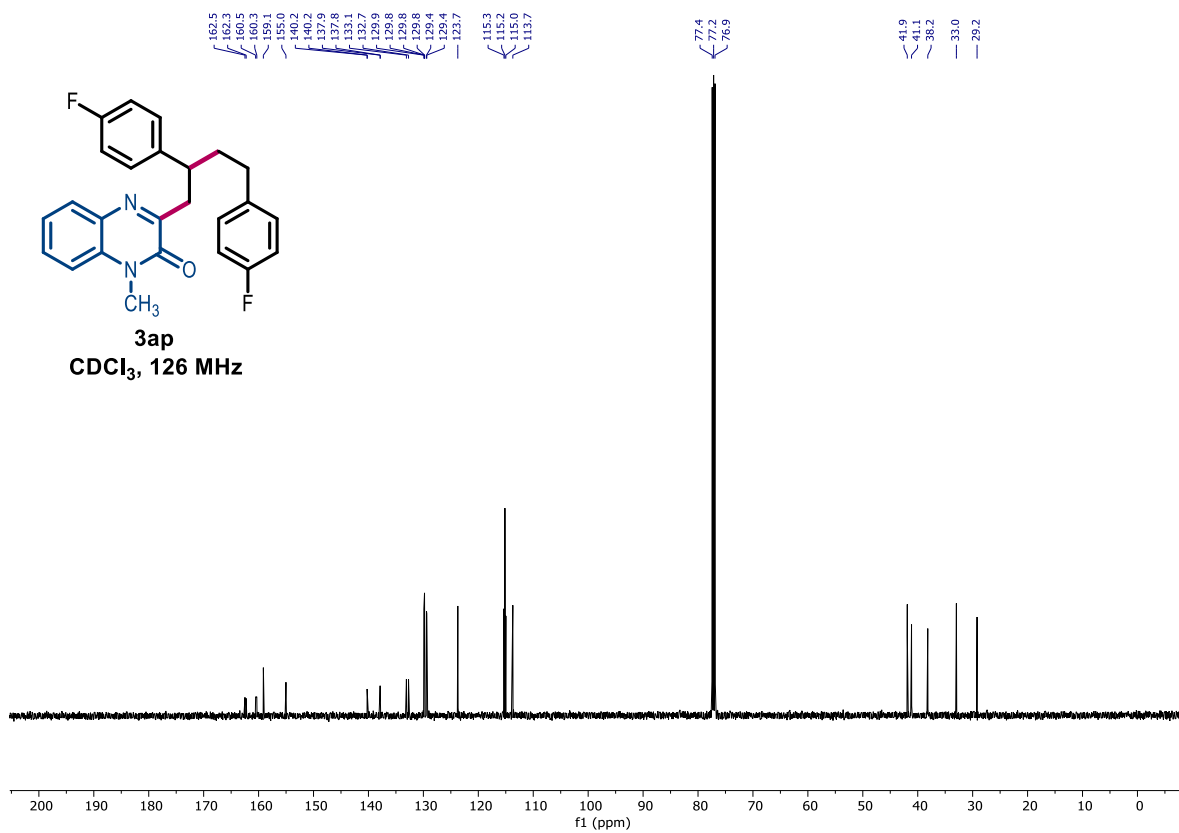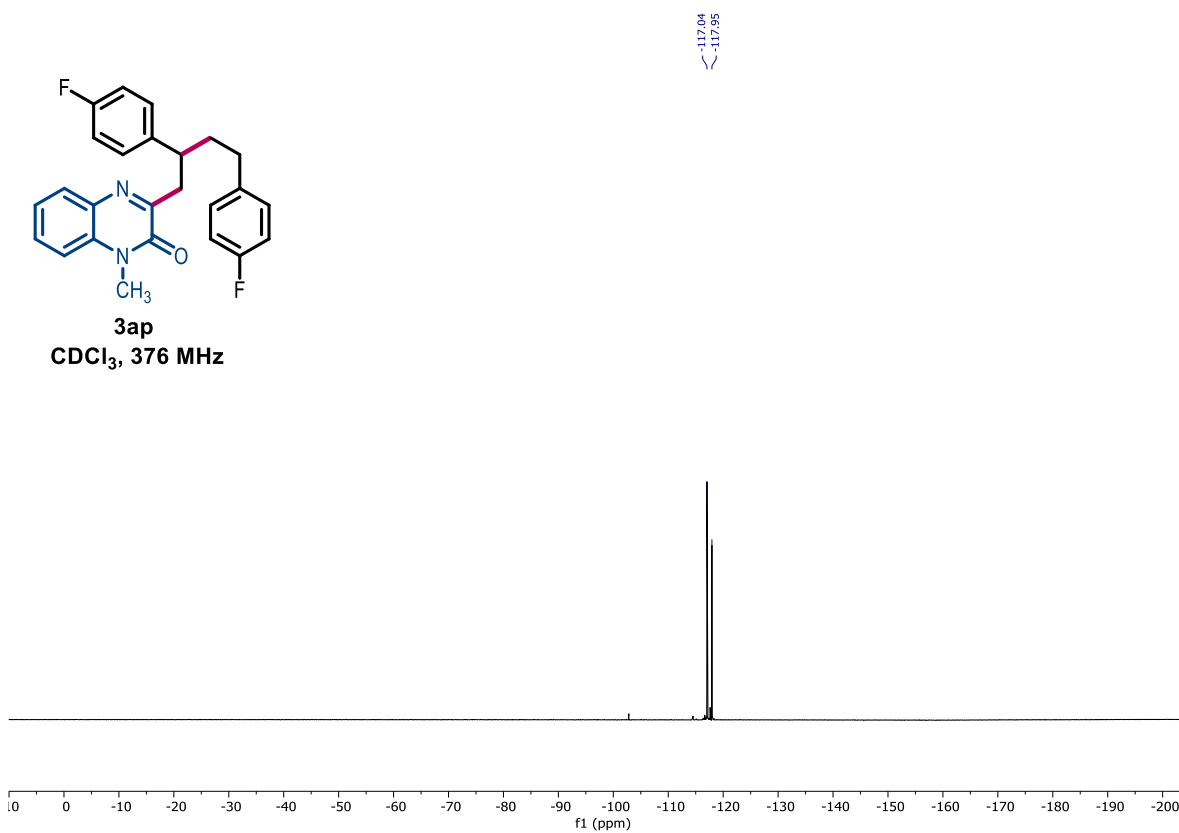

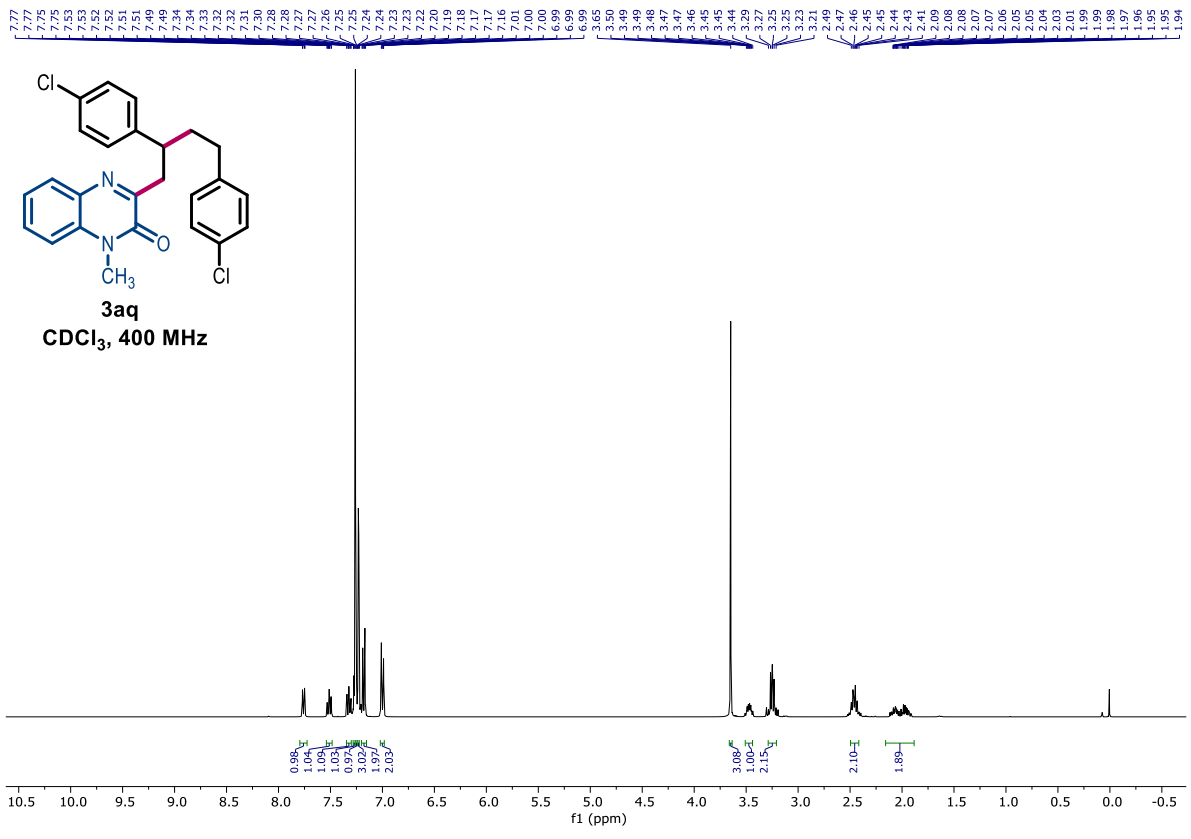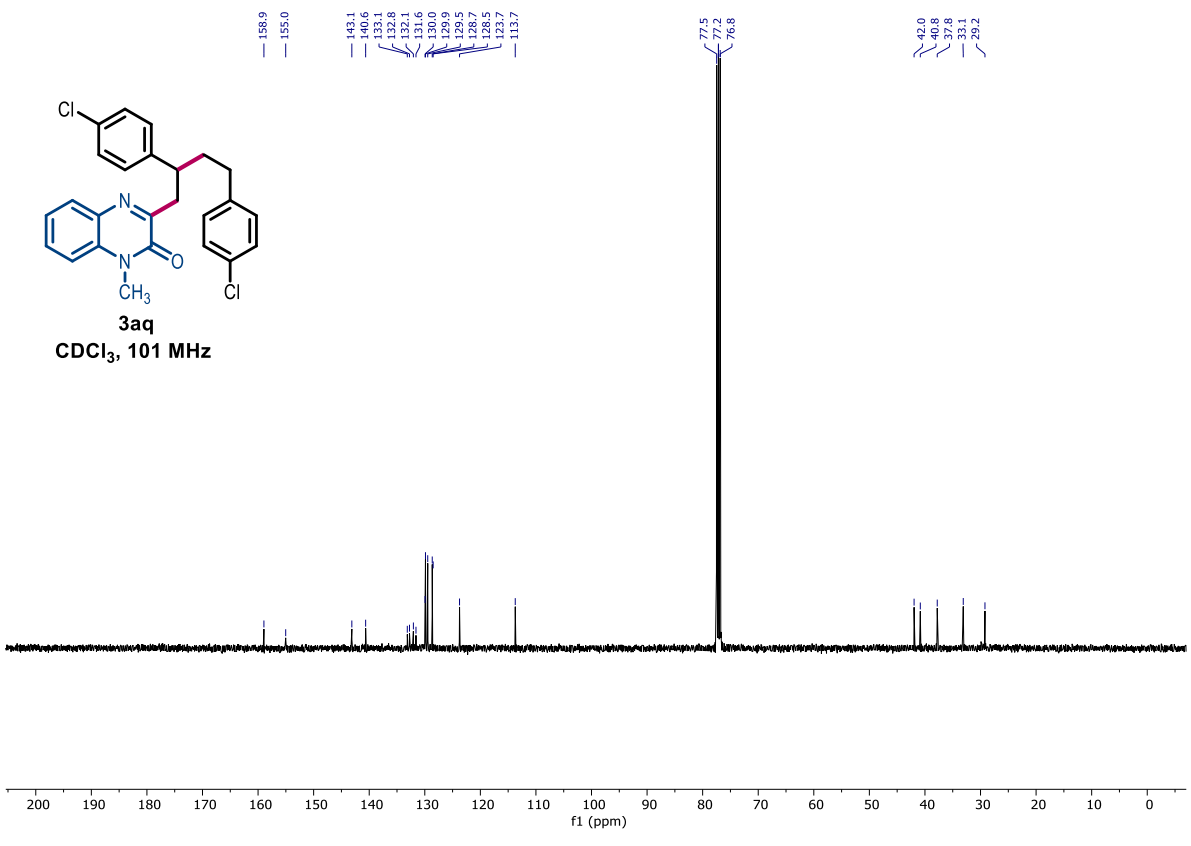

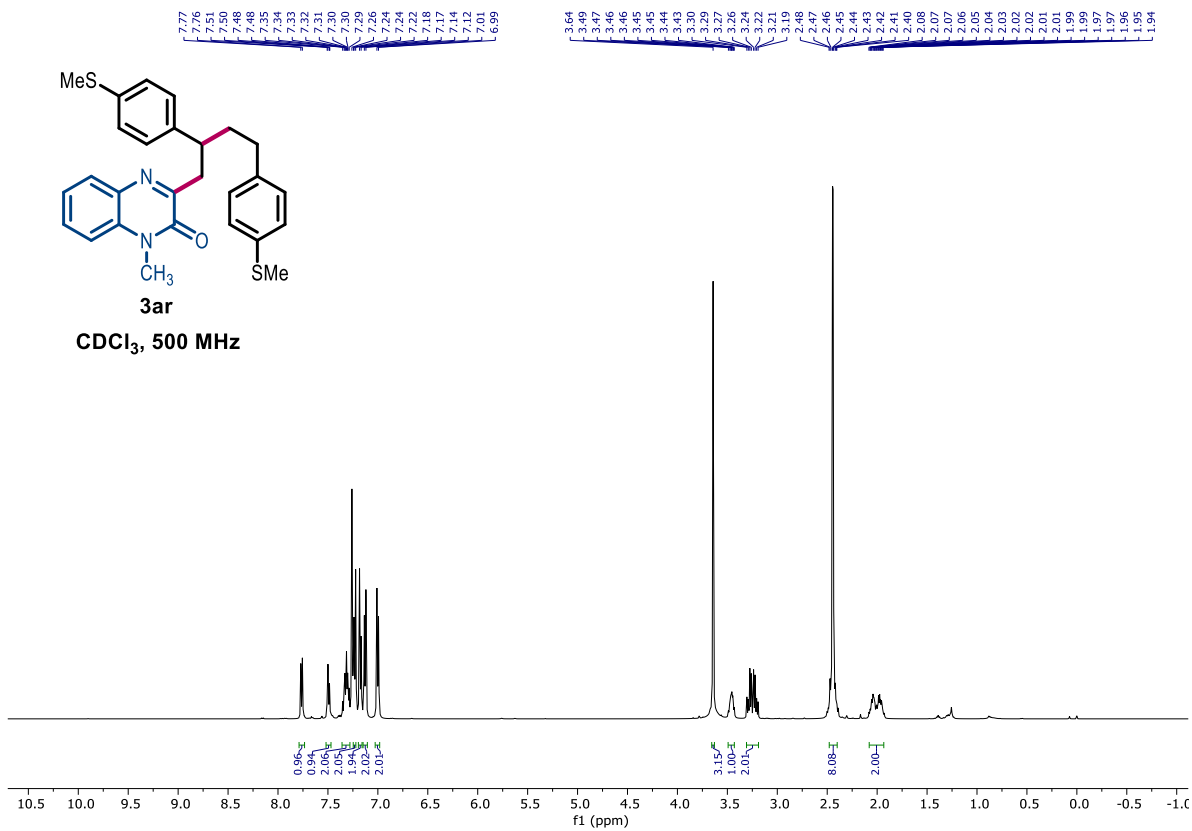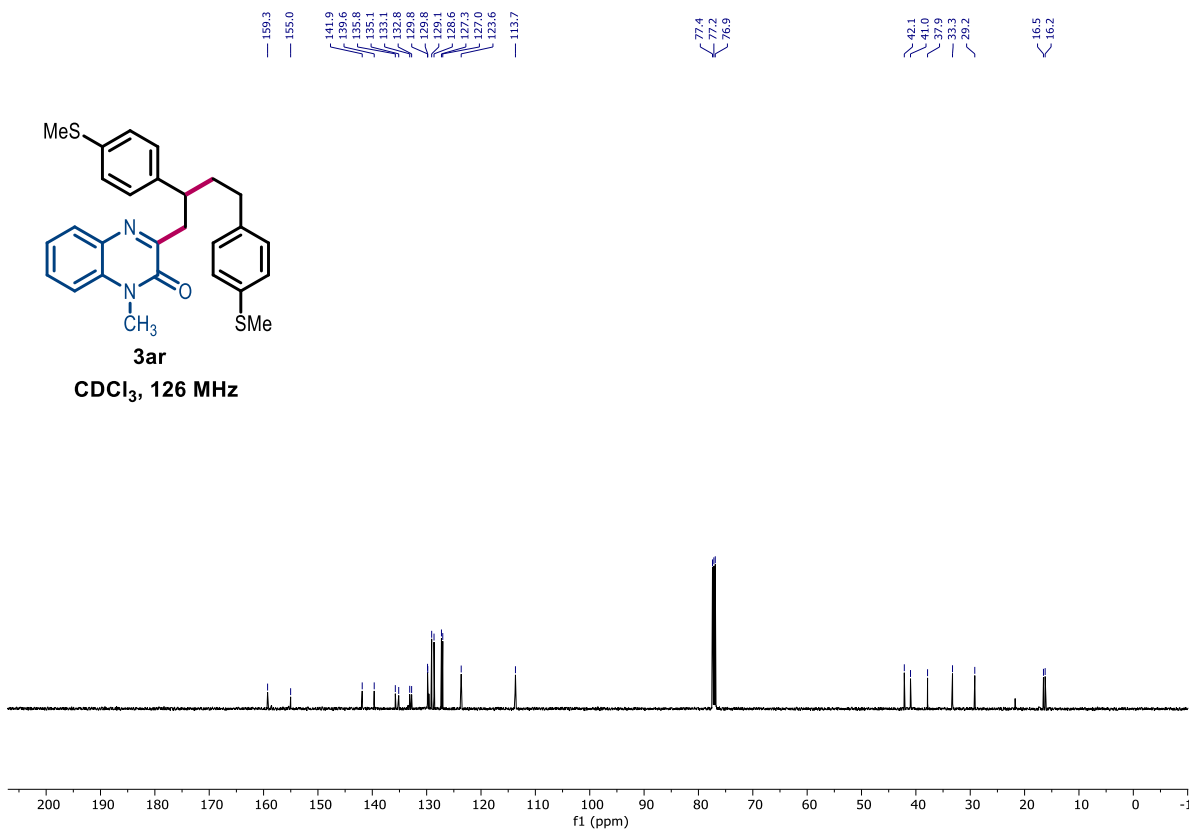



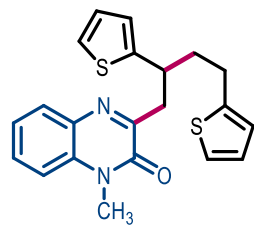

3as

CDCl<sub>3</sub>, 500 MHz

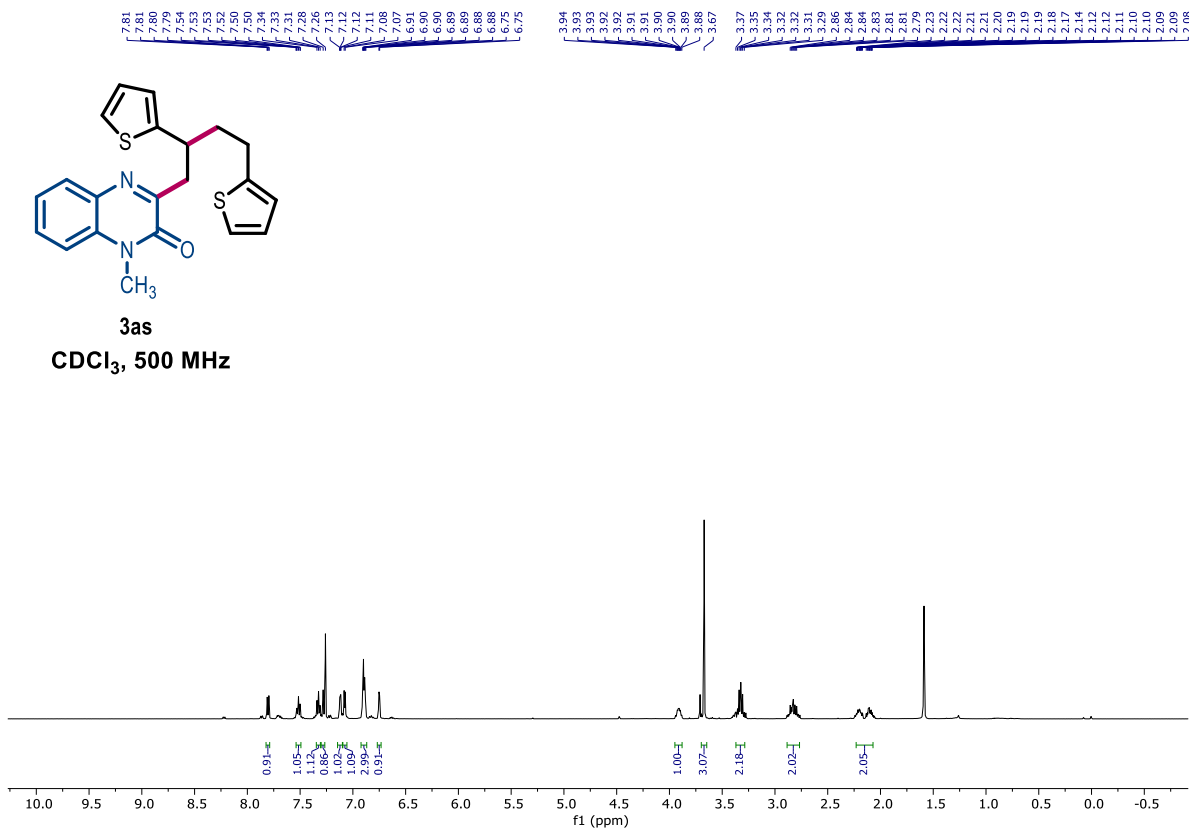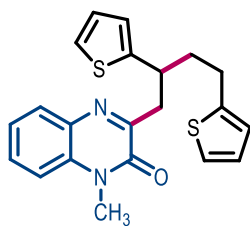

3as

CDCl<sub>3</sub>, 126 MHz

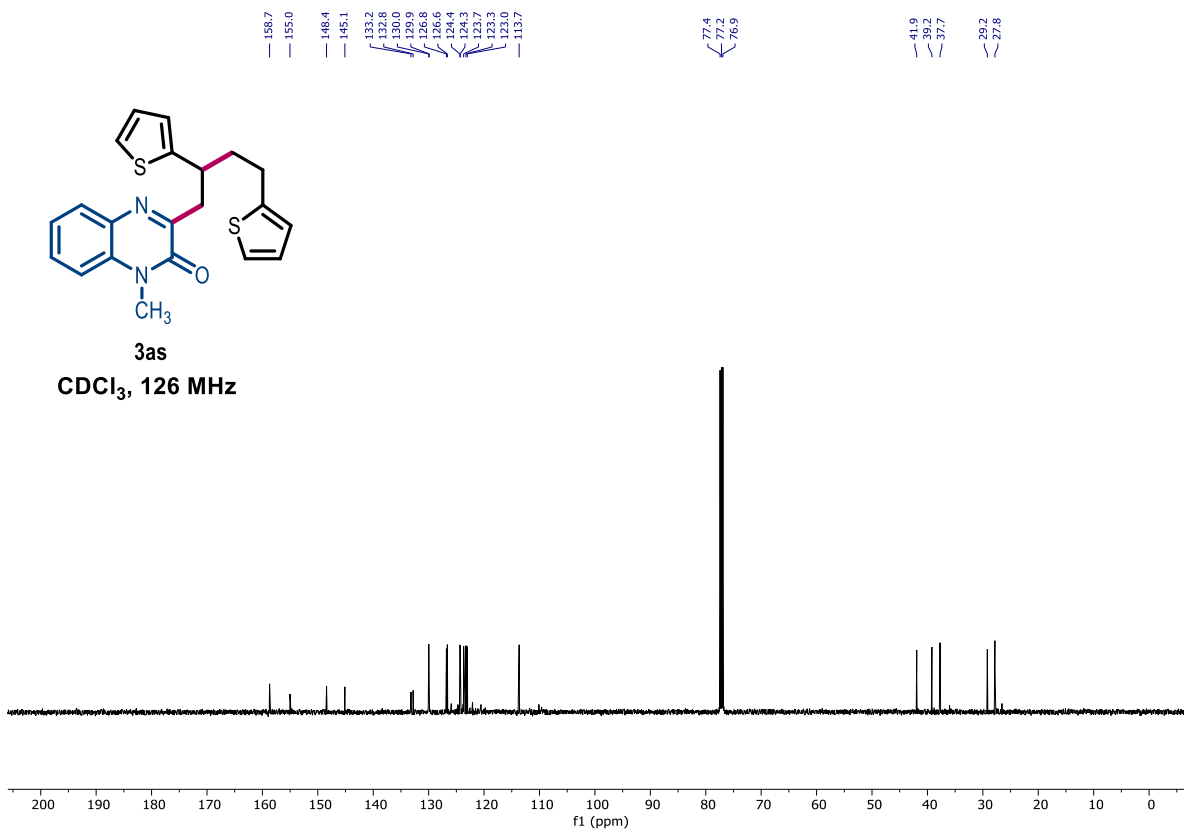

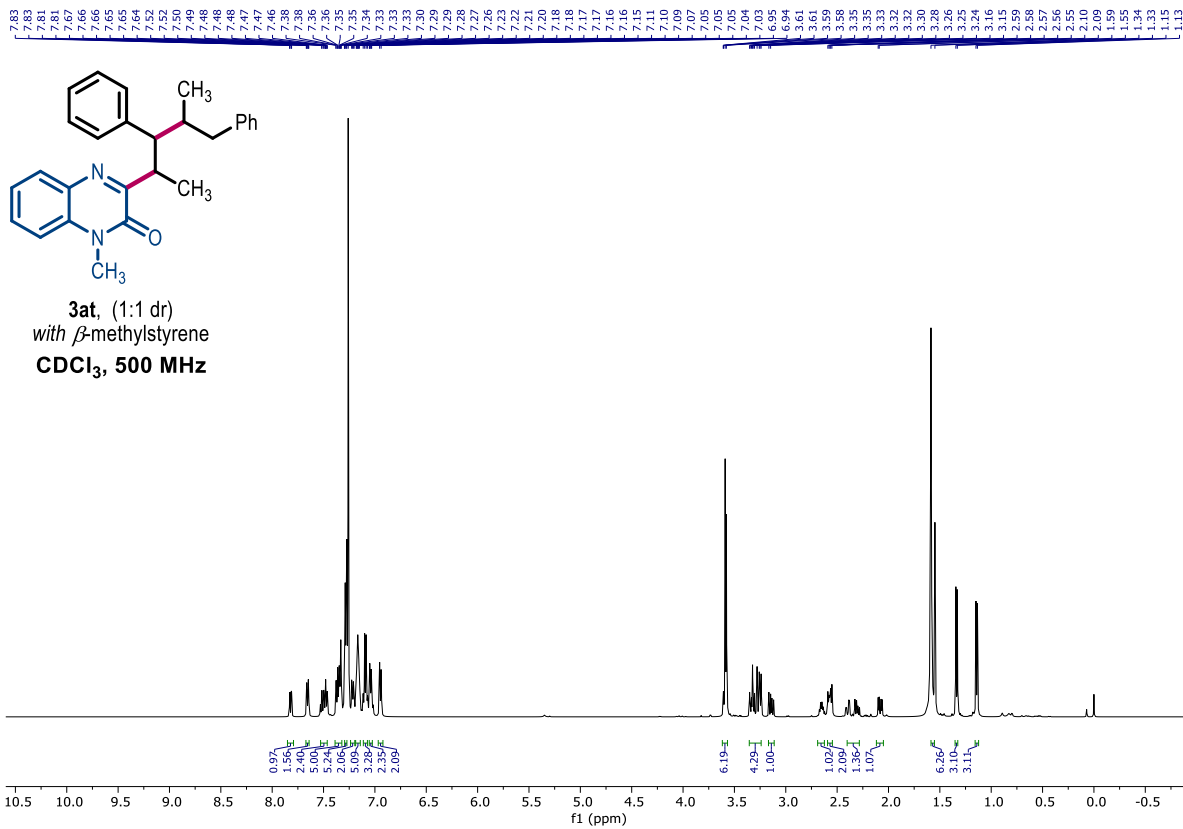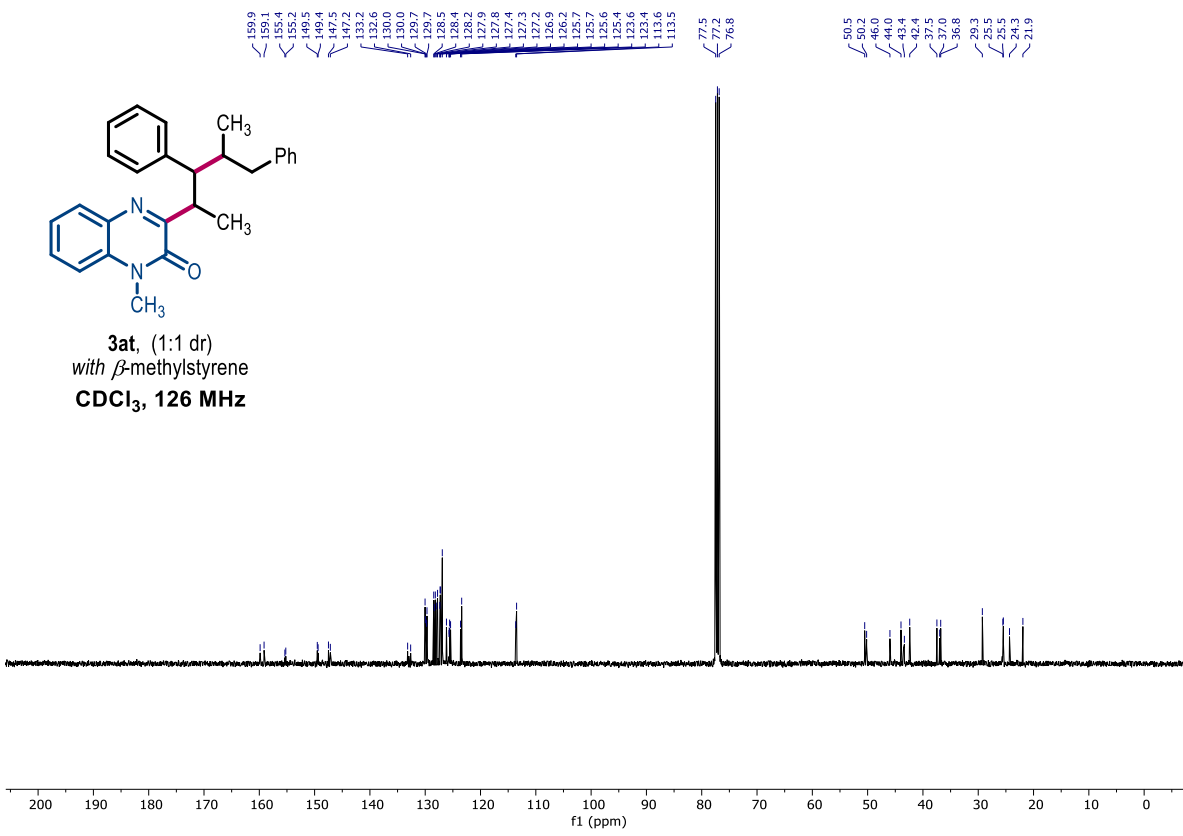

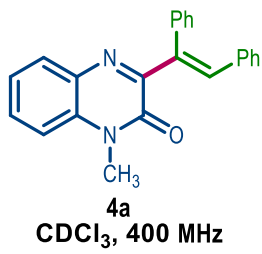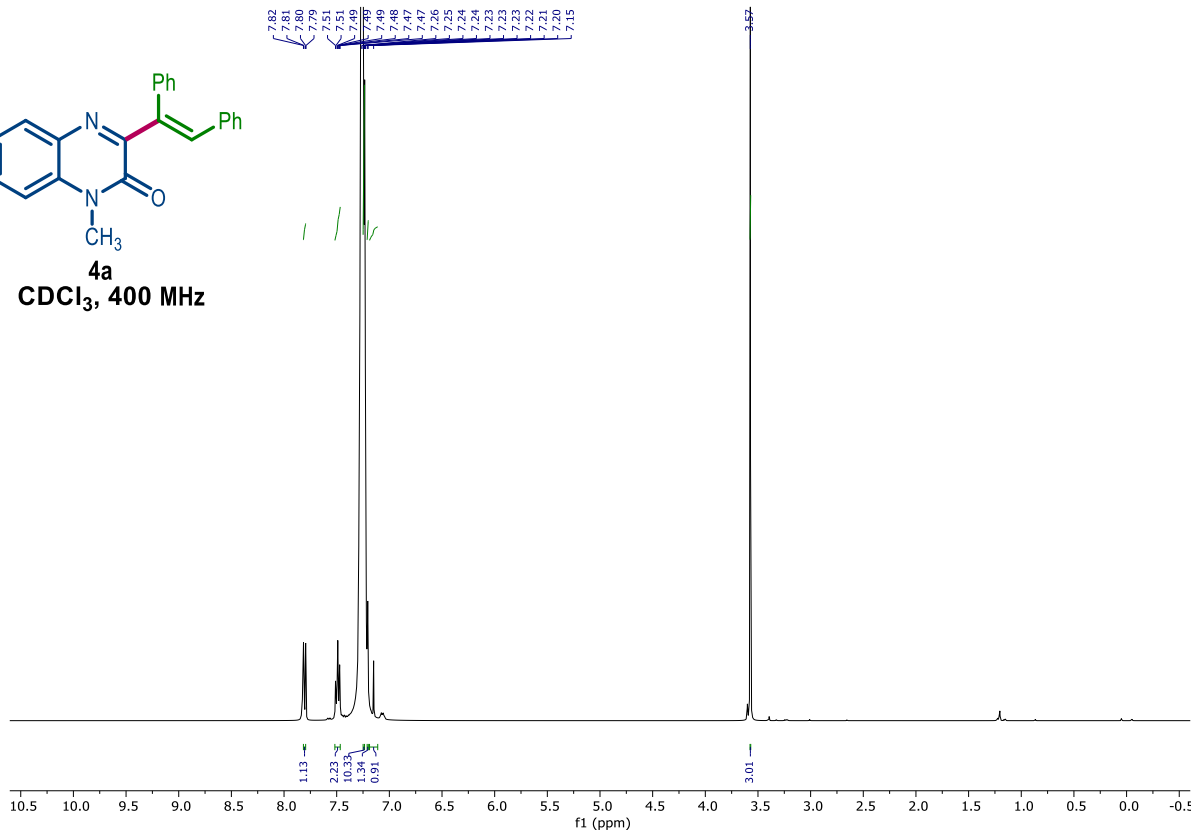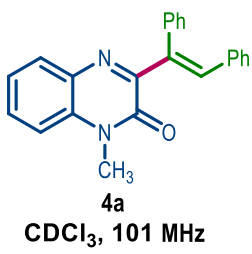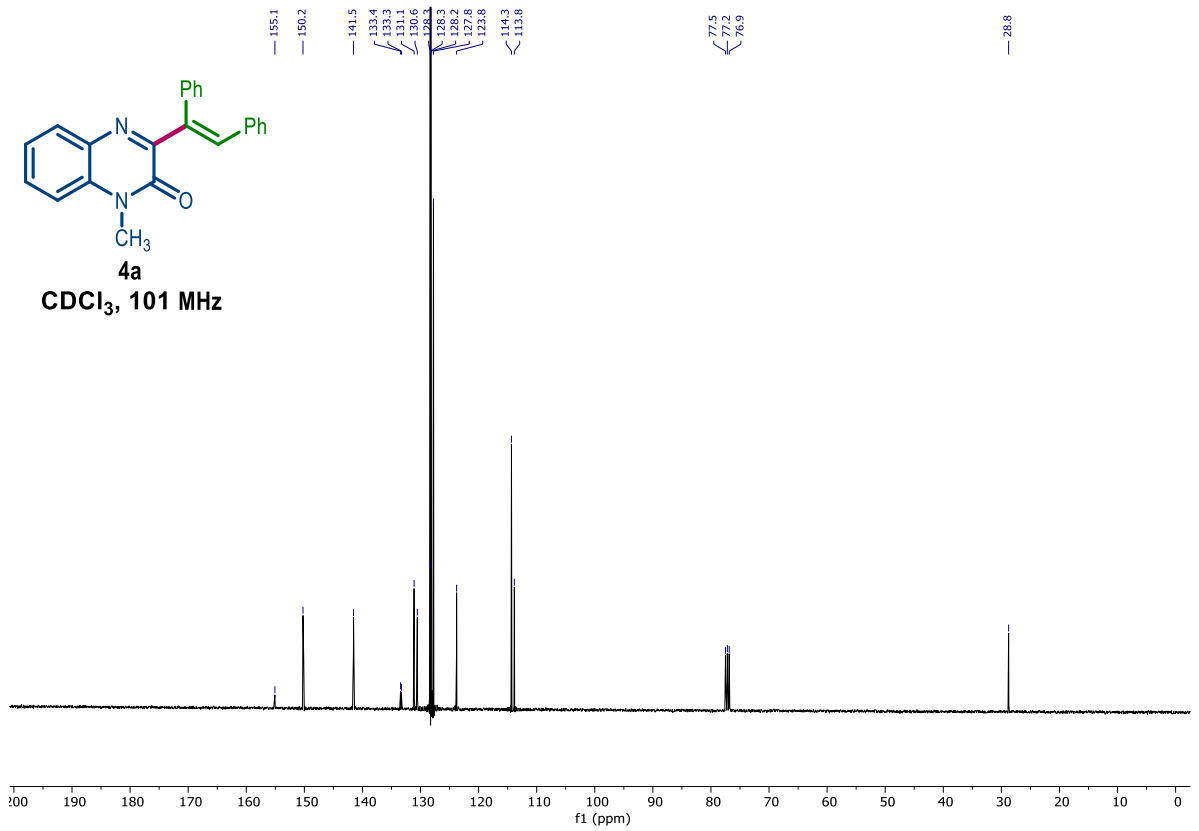

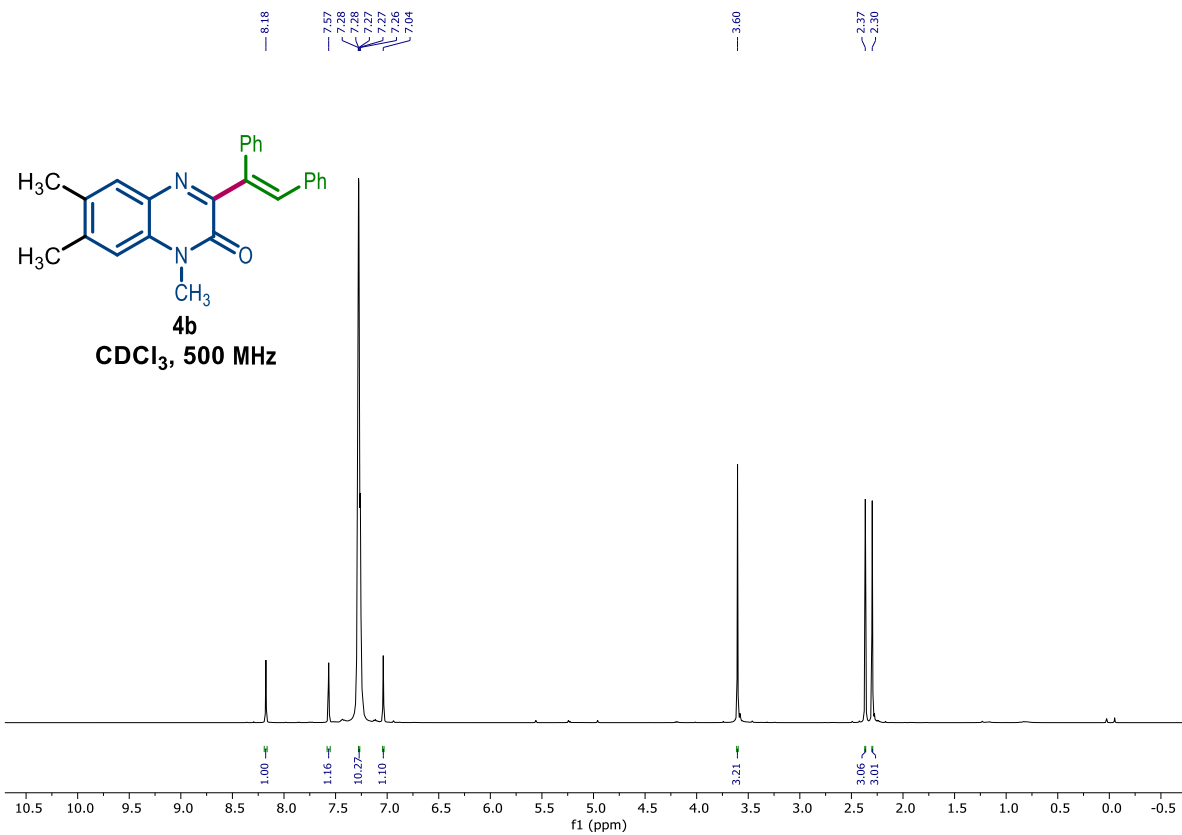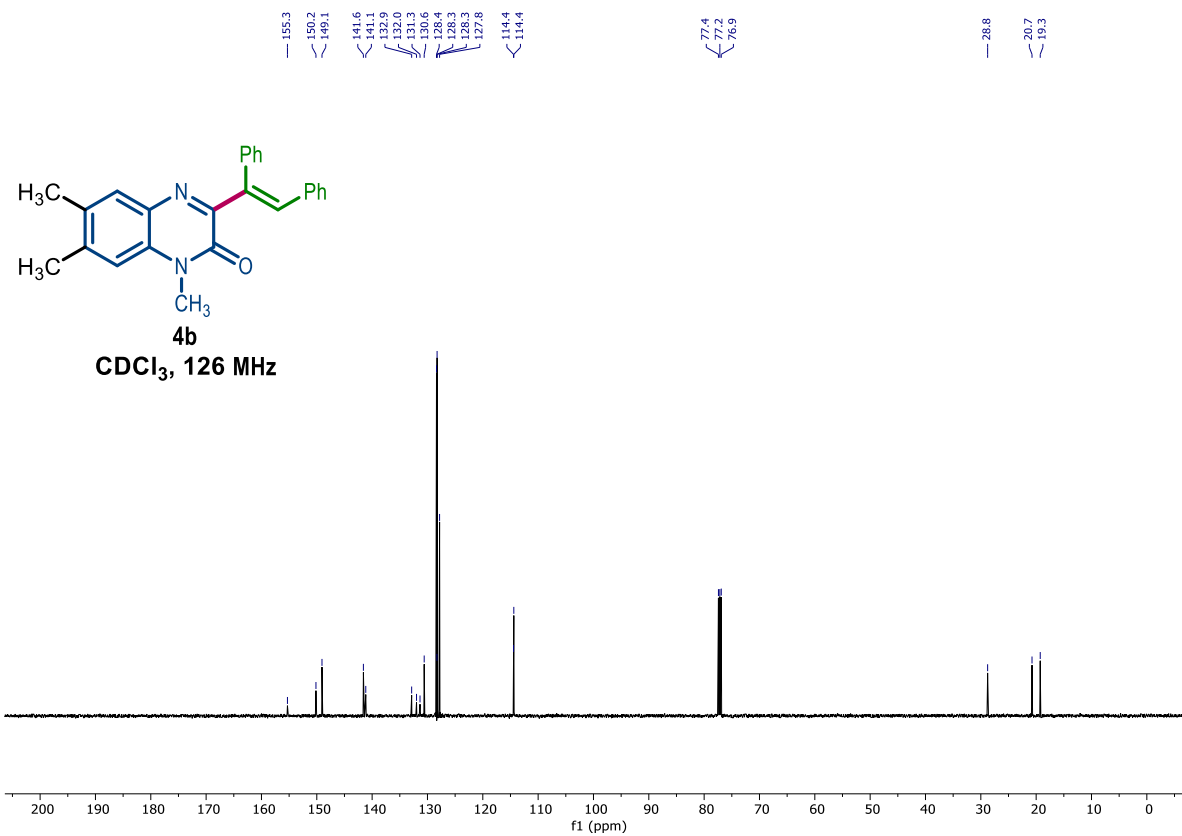

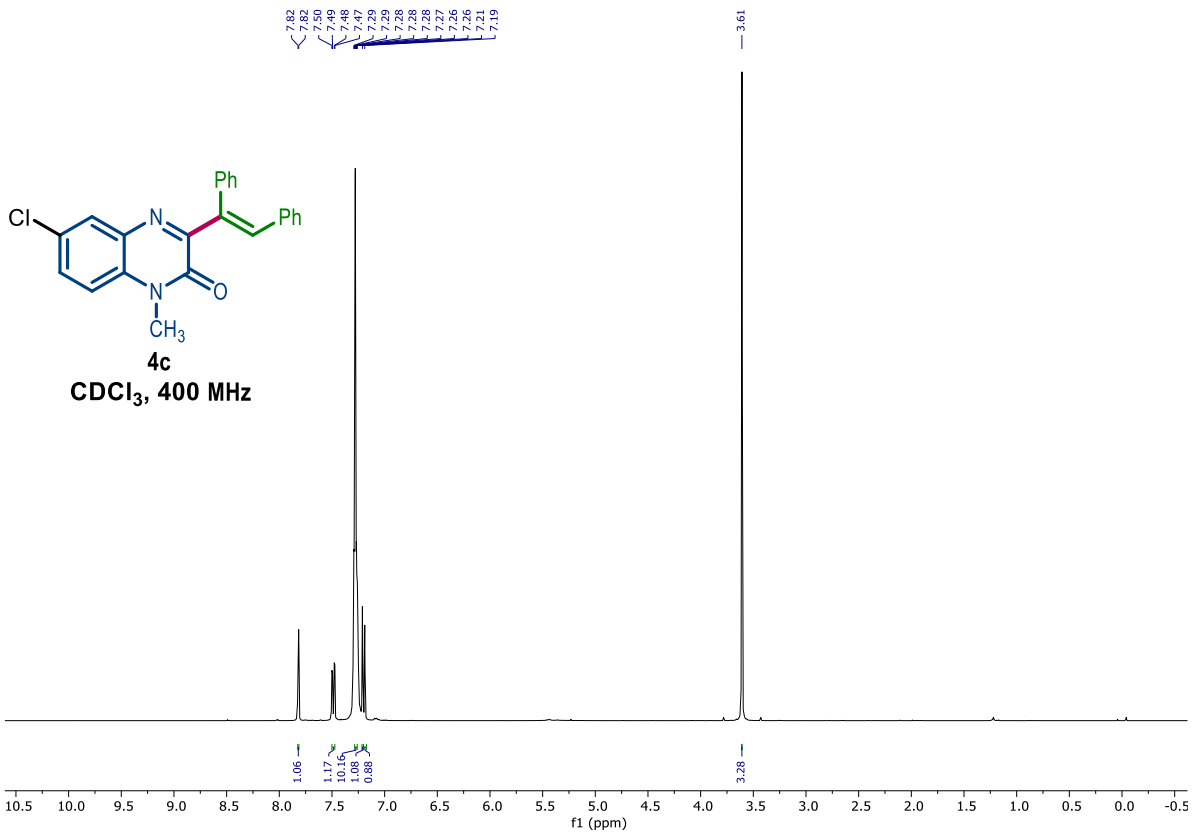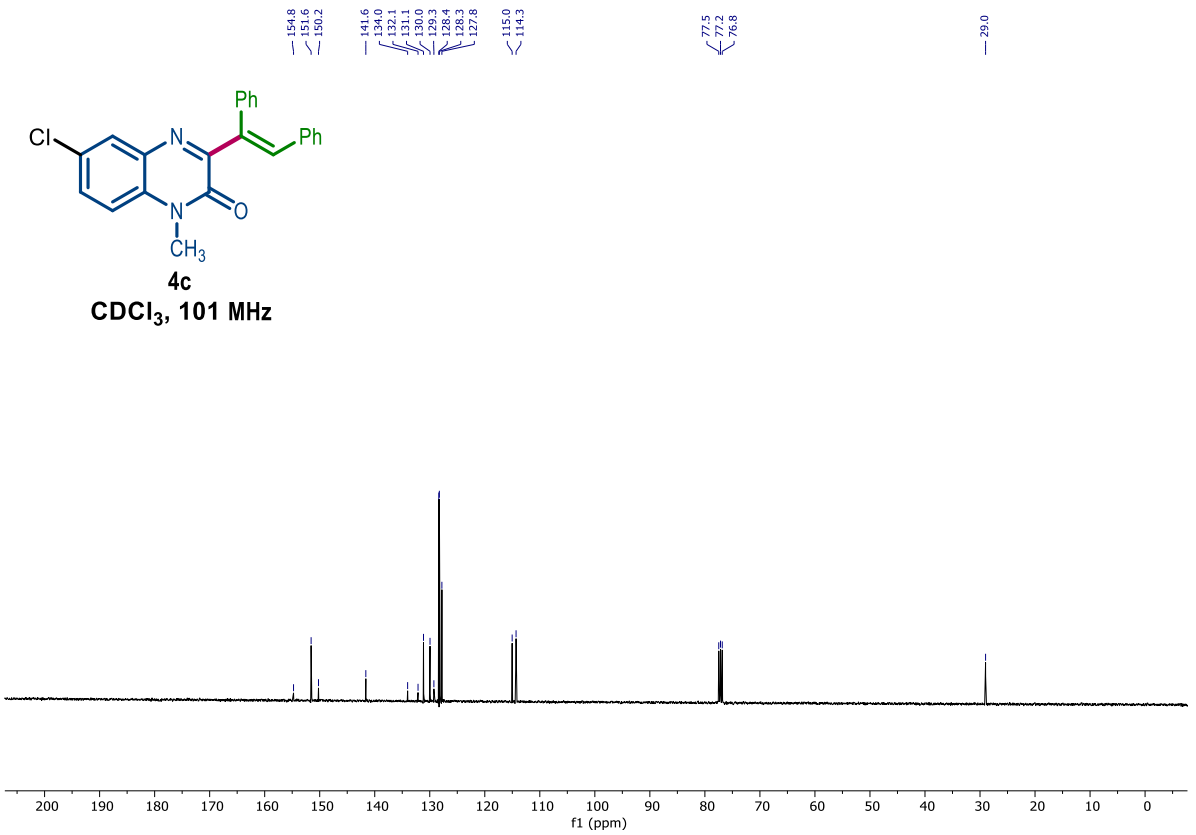

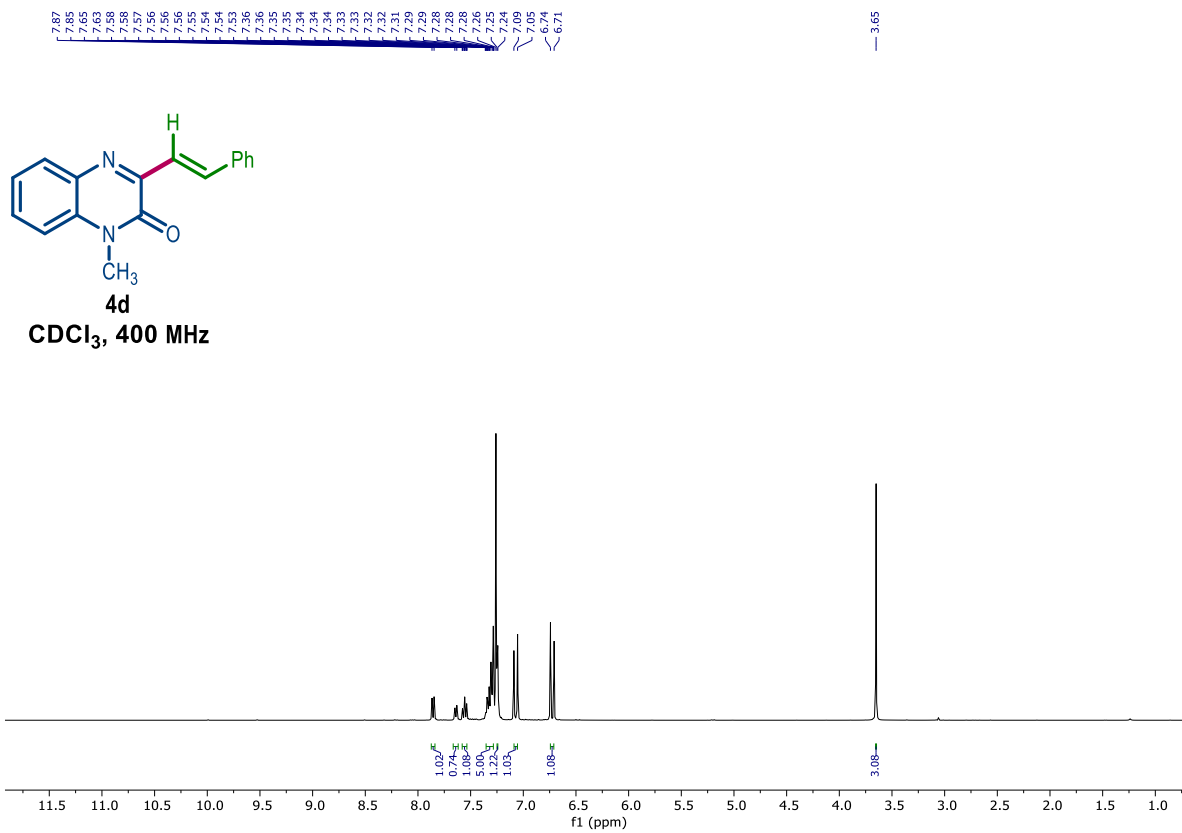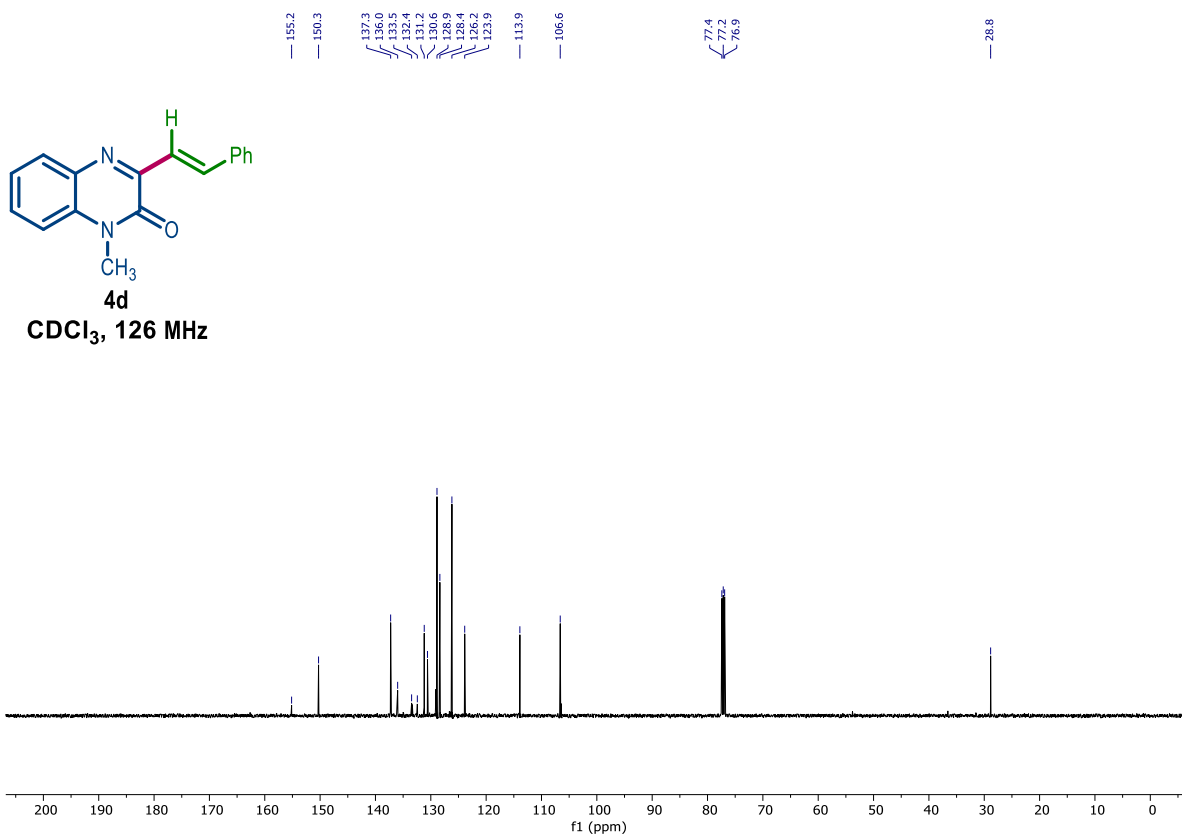

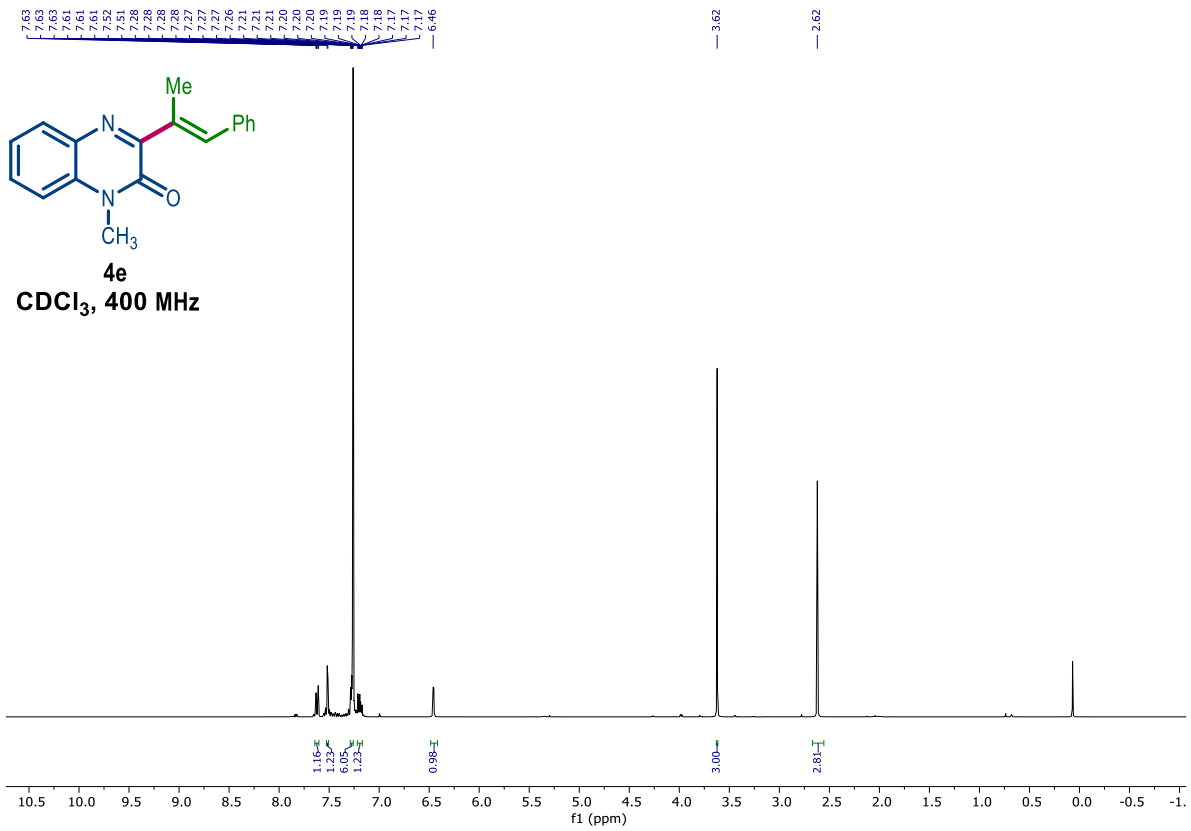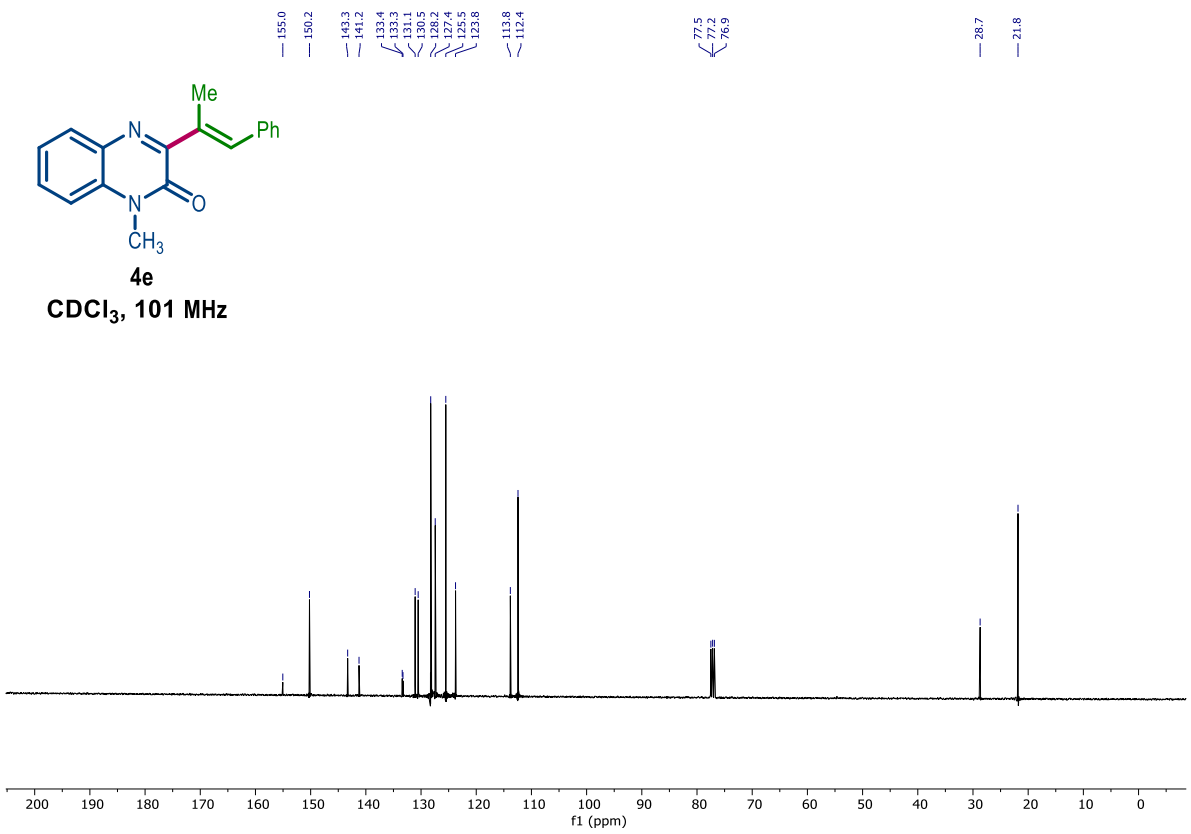

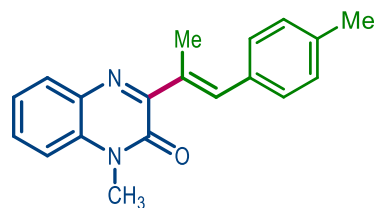

**4f**  
CDCl<sub>3</sub>, 400 MHz

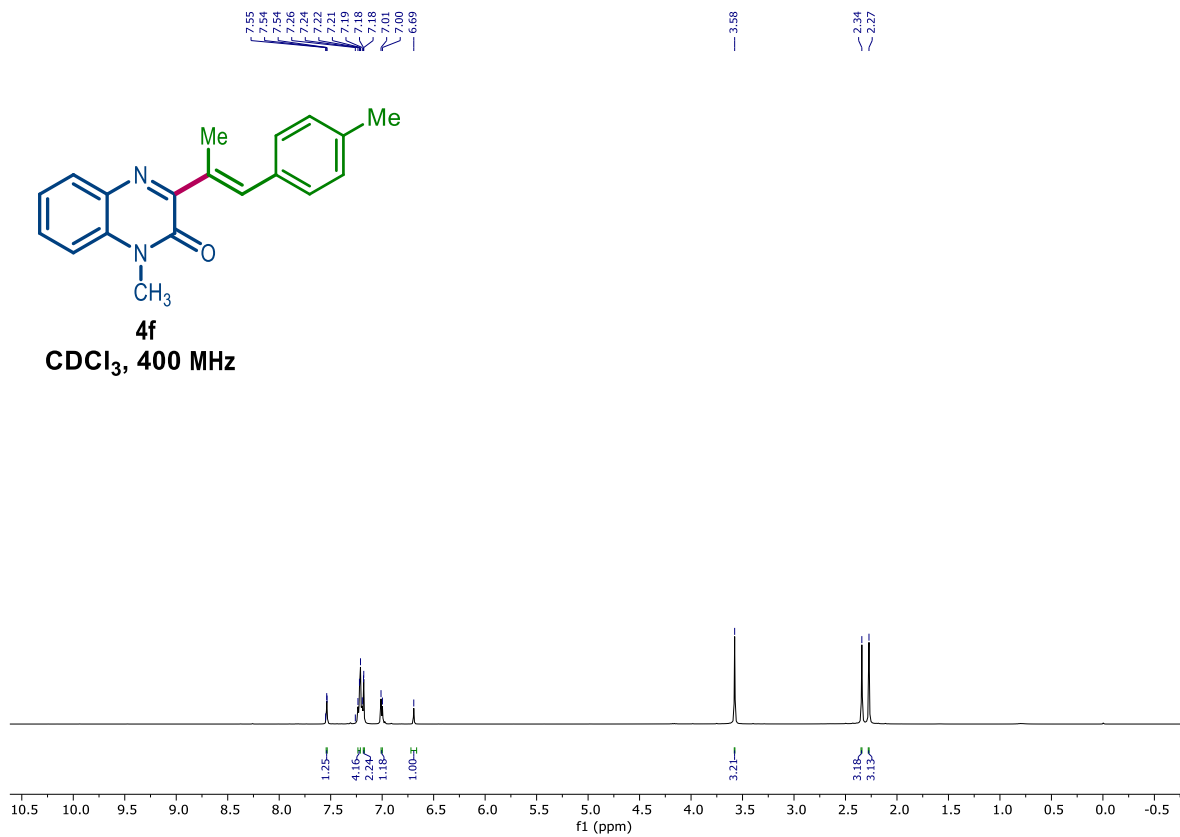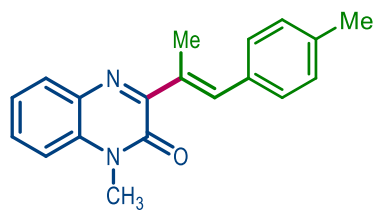

**4f**  
CDCl<sub>3</sub>, 101 MHz

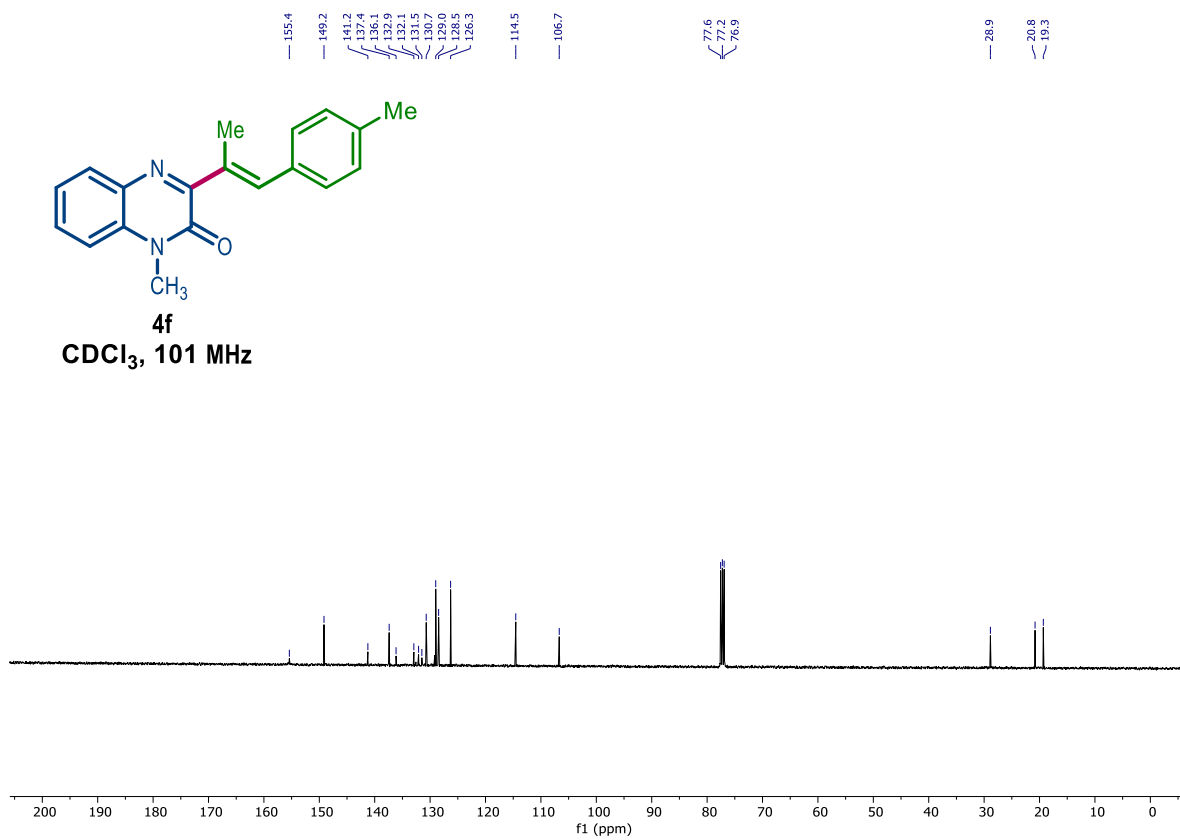



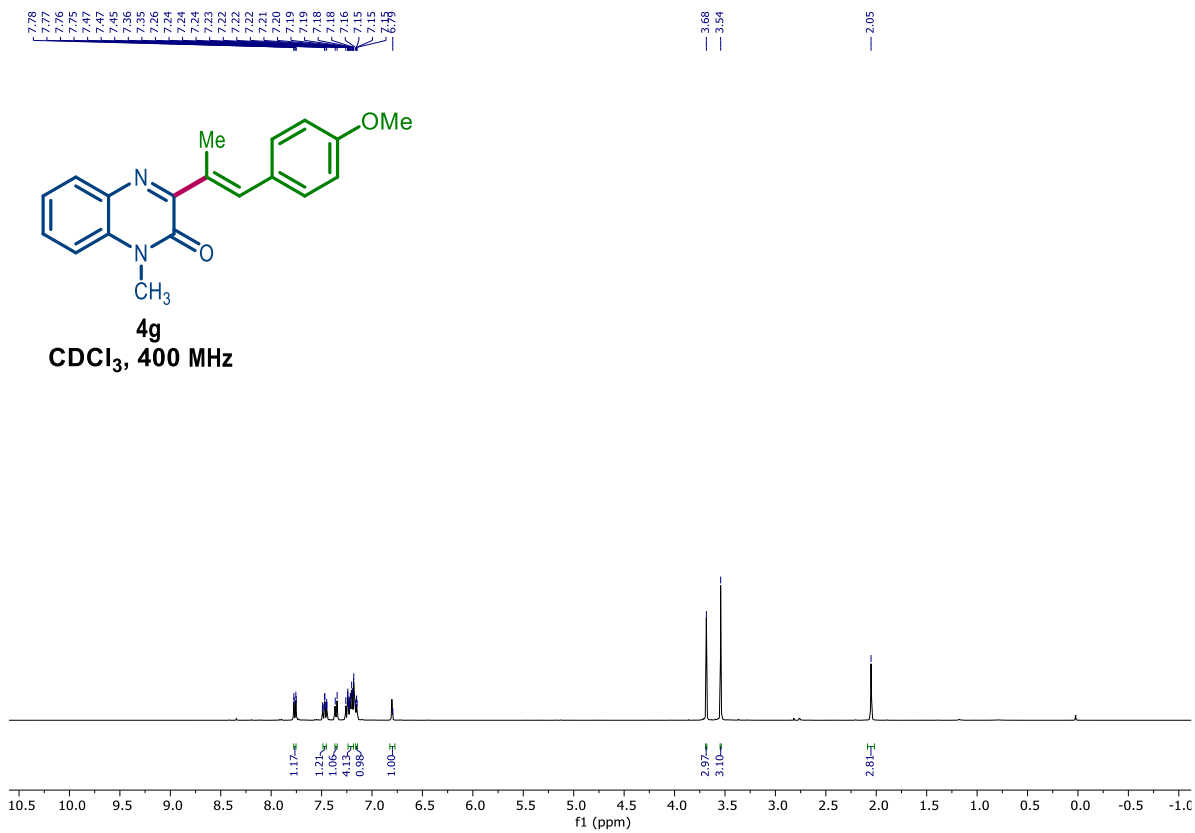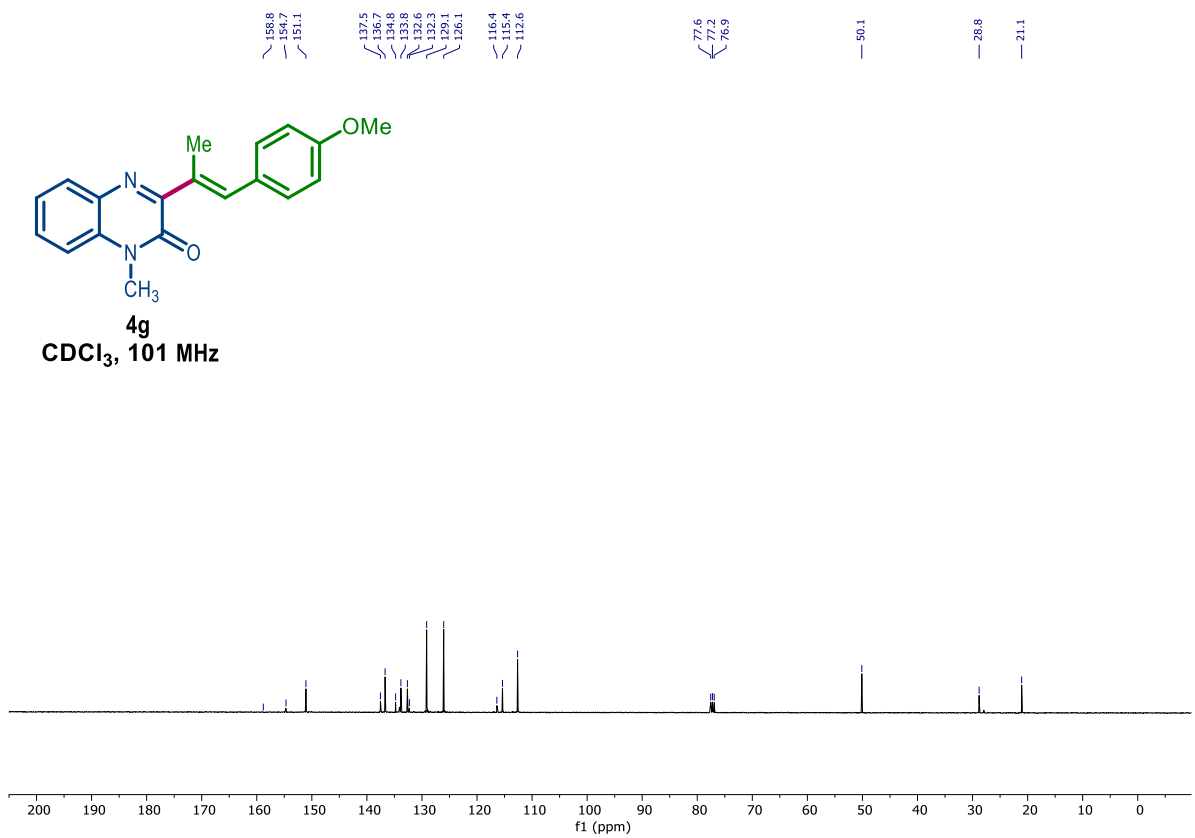

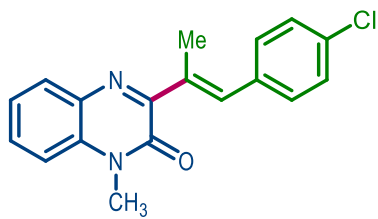

4h  
CDCl<sub>3</sub>, 500 MHz

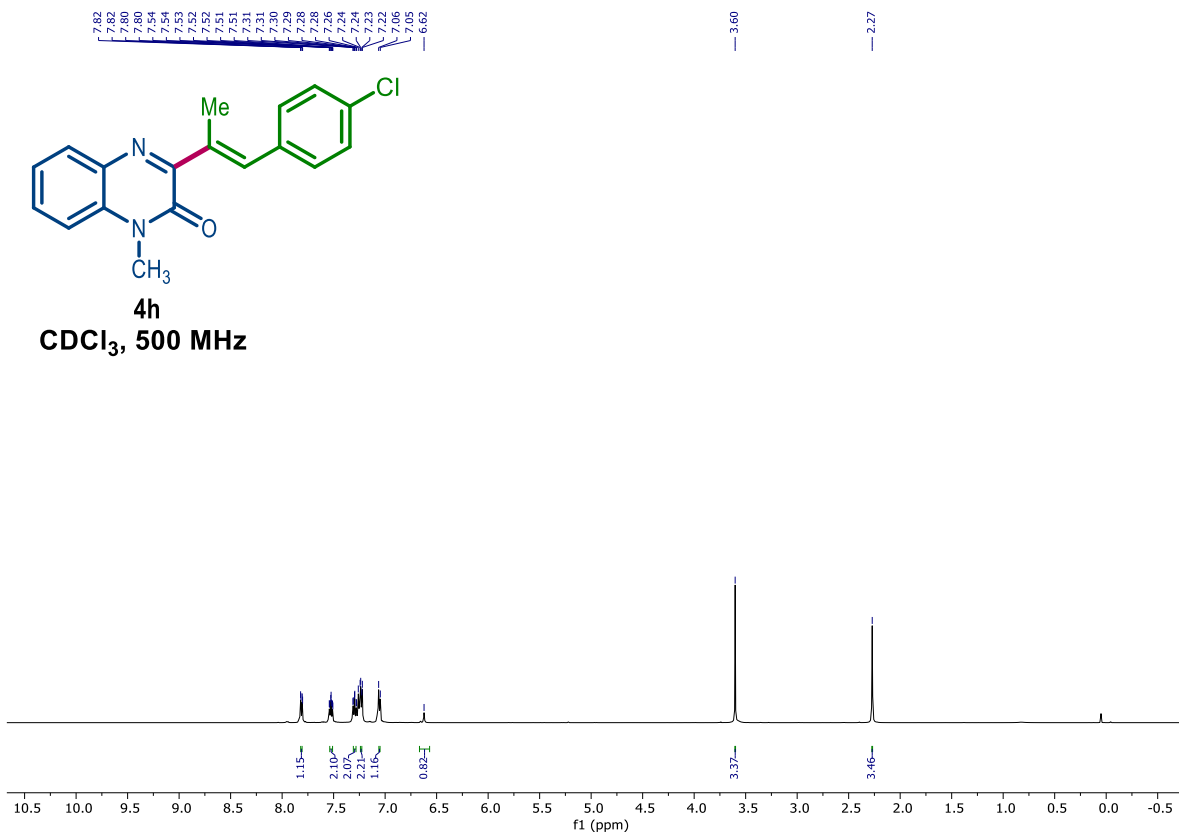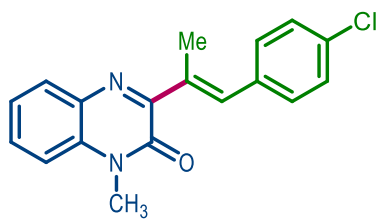

4h  
CDCl<sub>3</sub>, 126 MHz

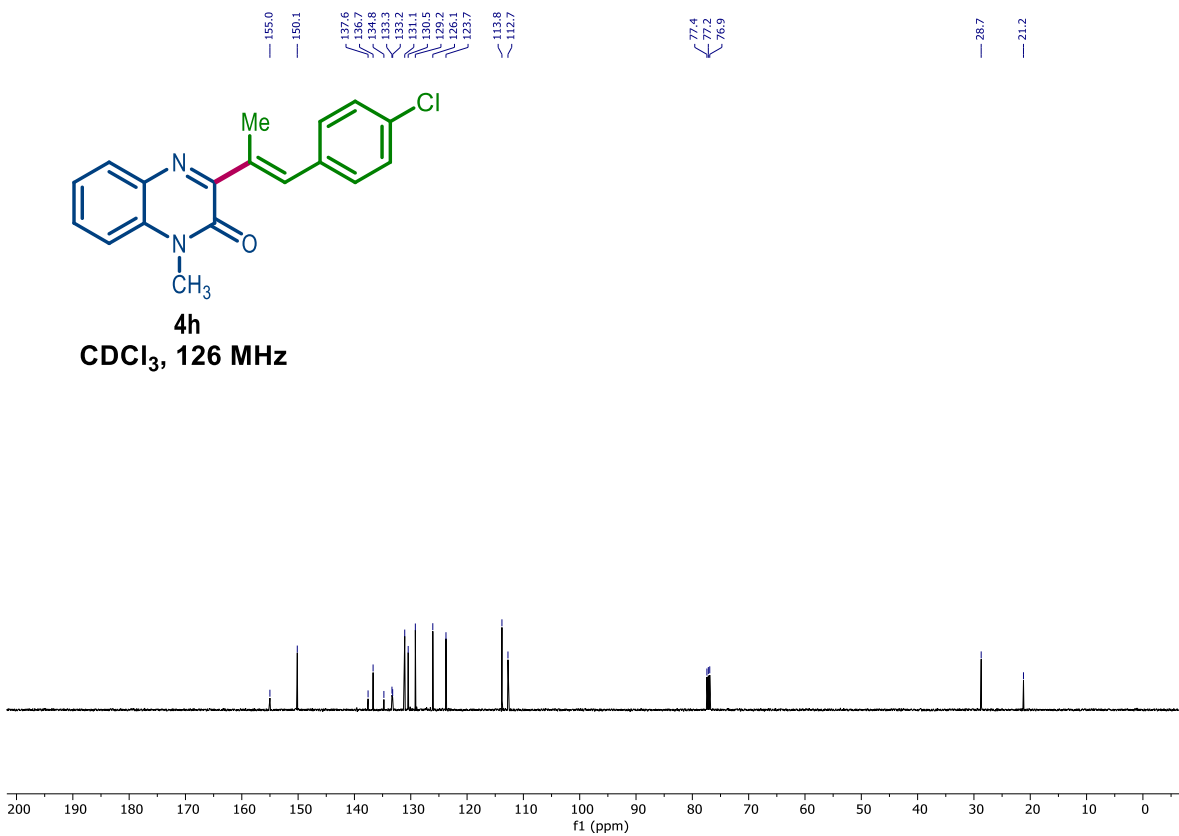

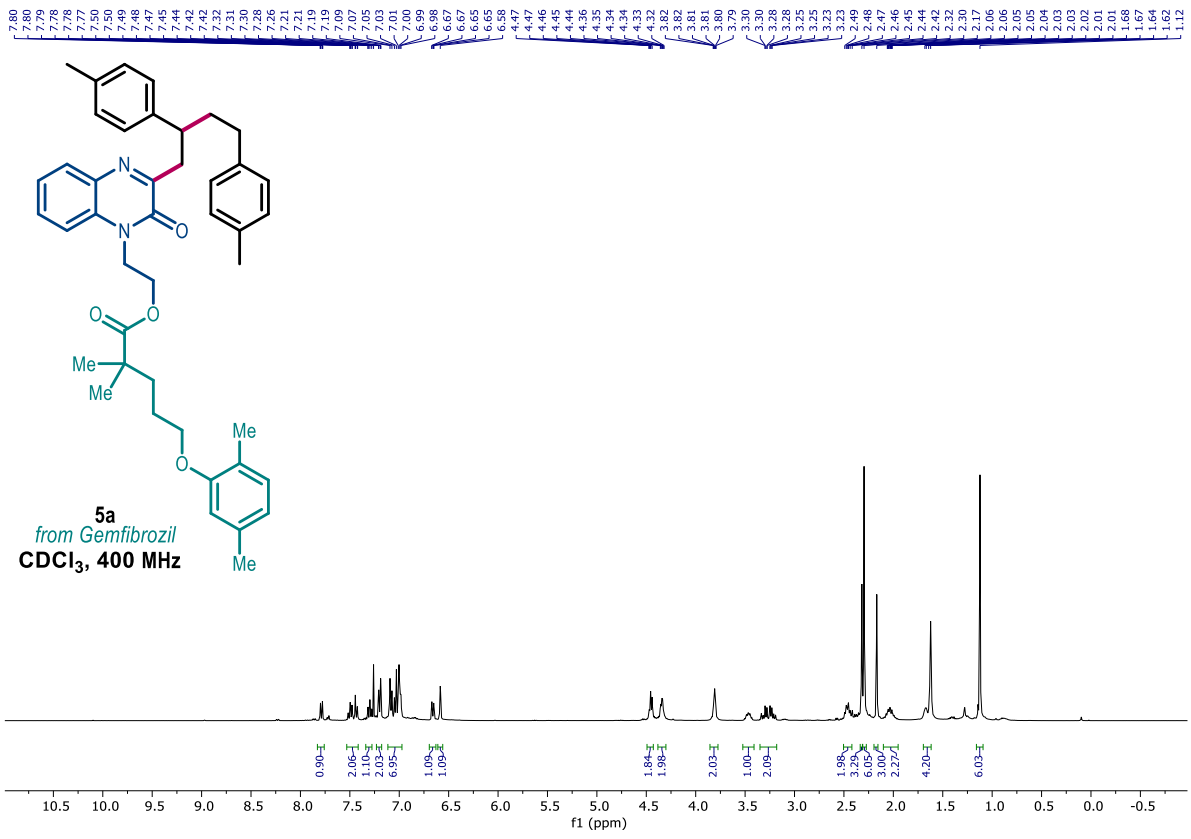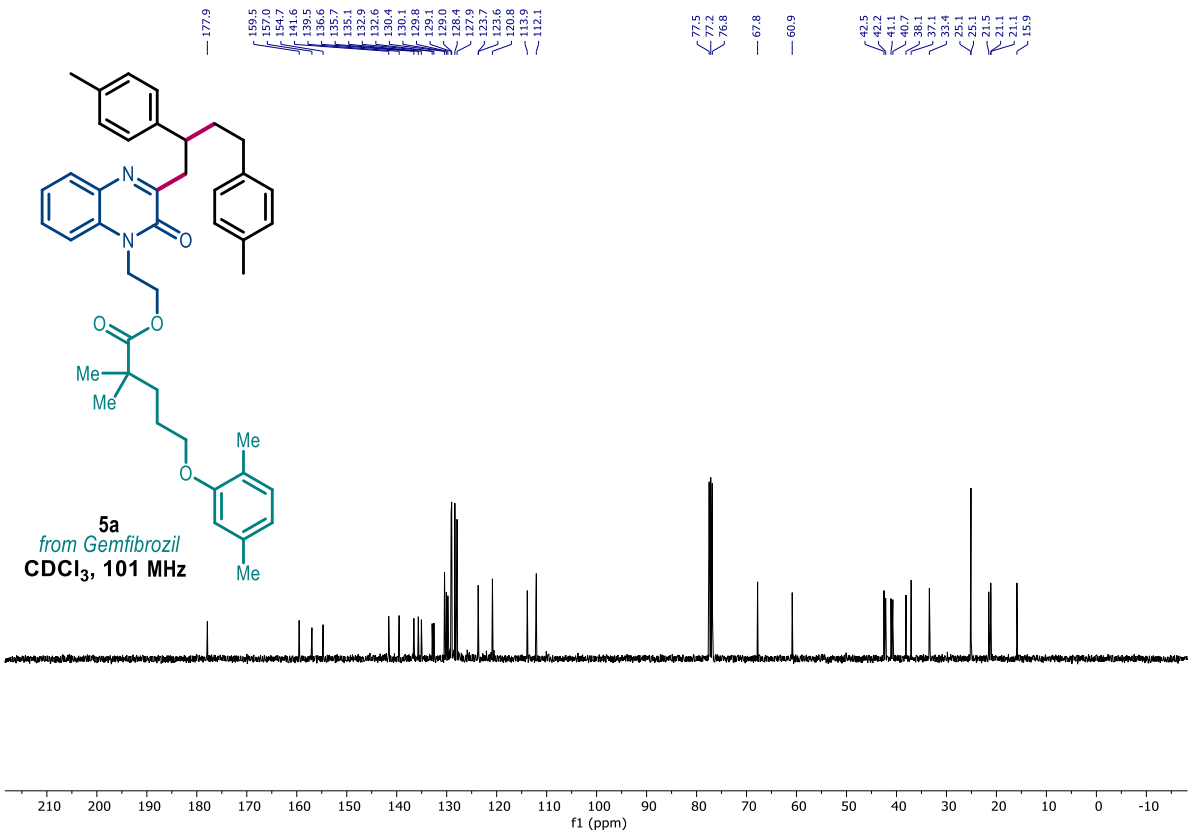

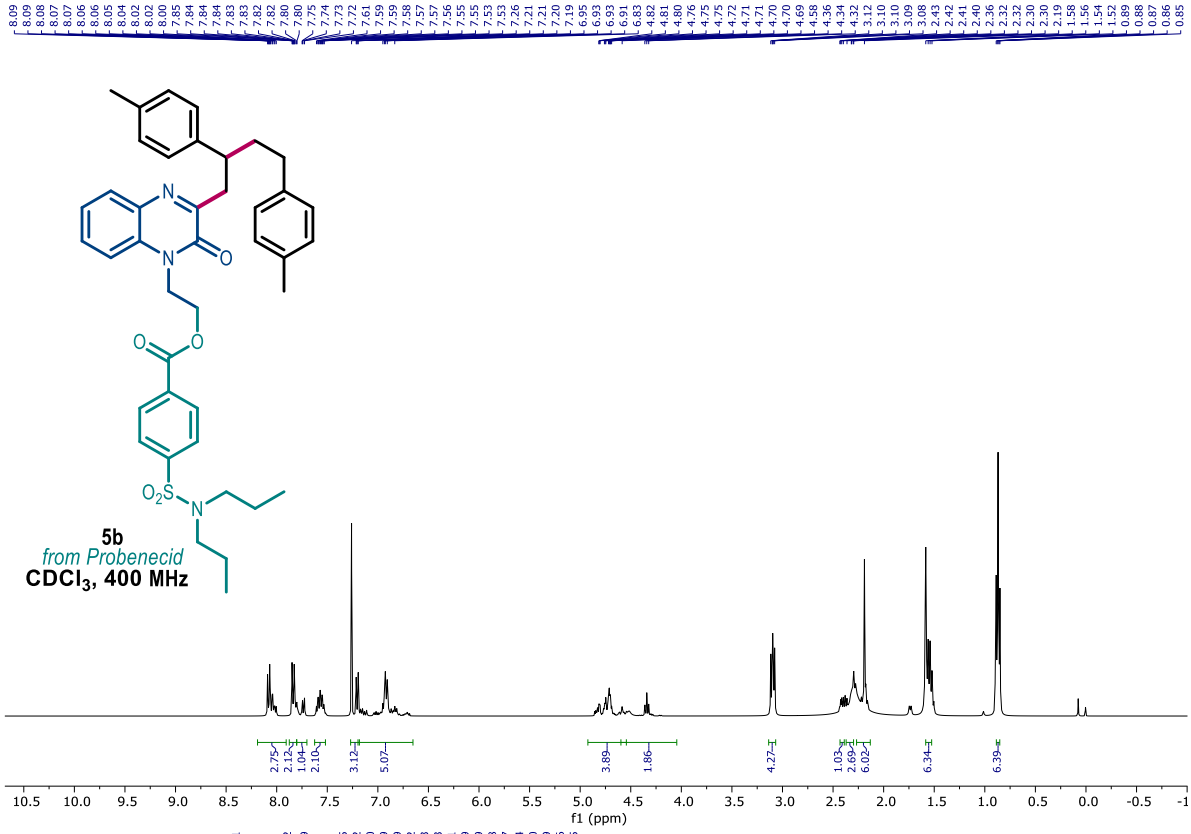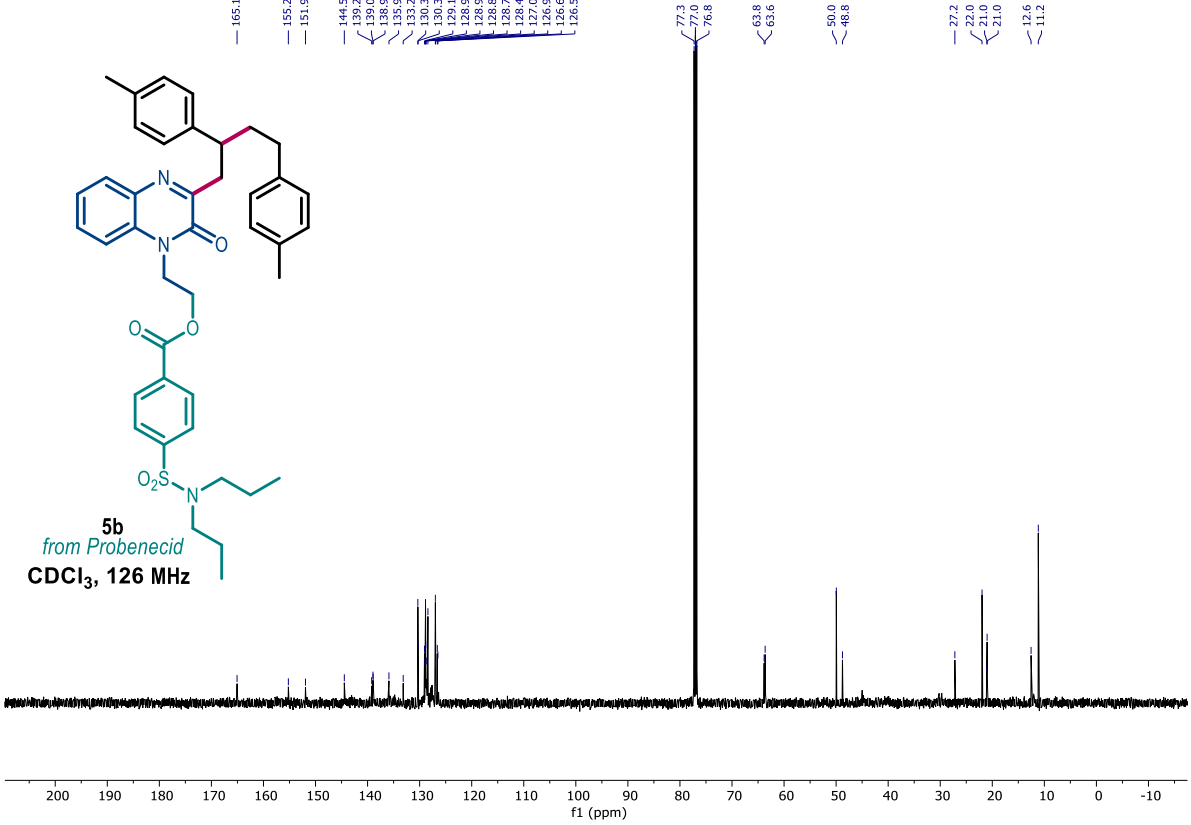

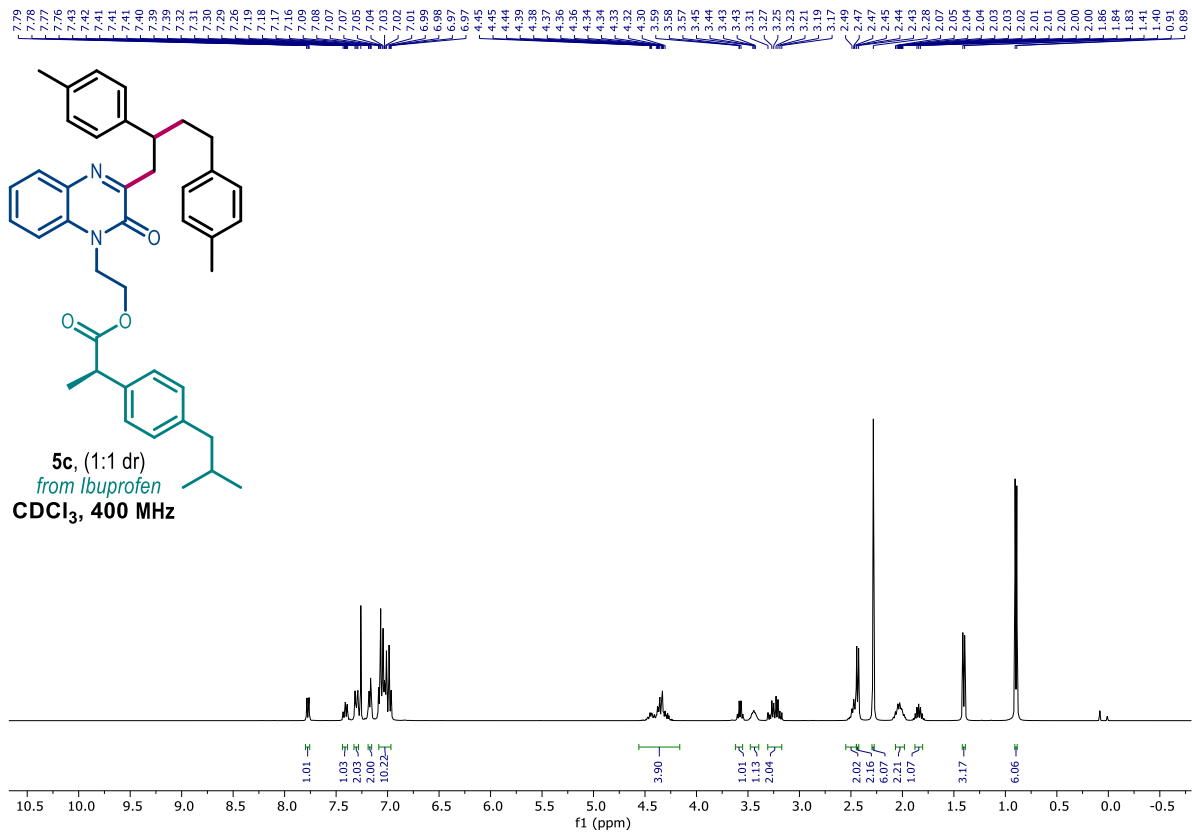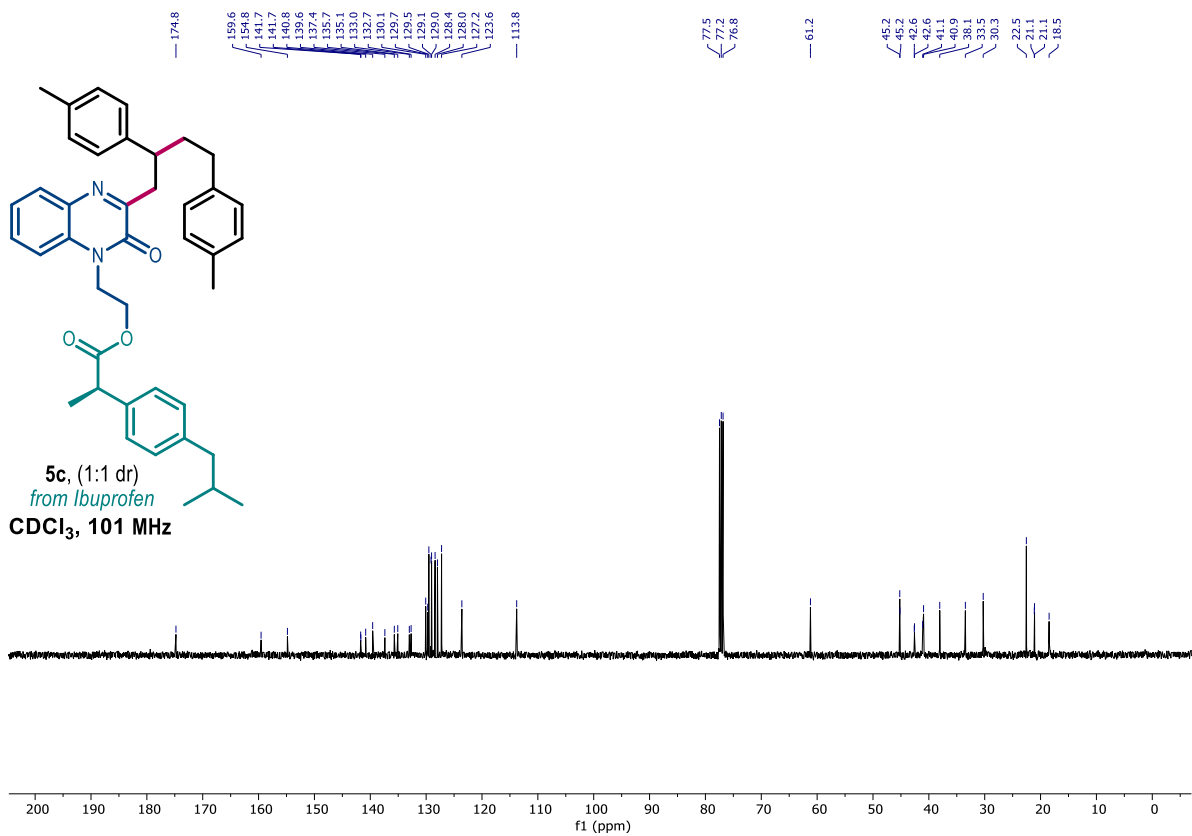

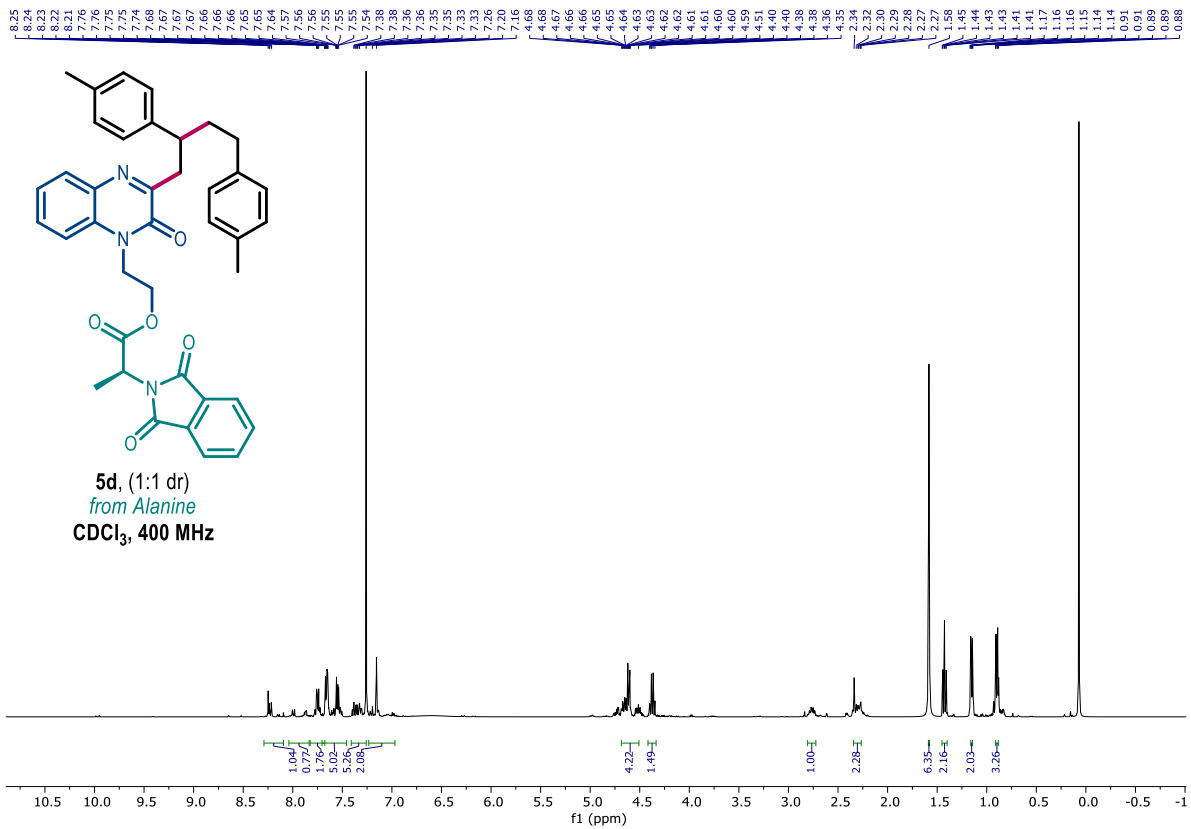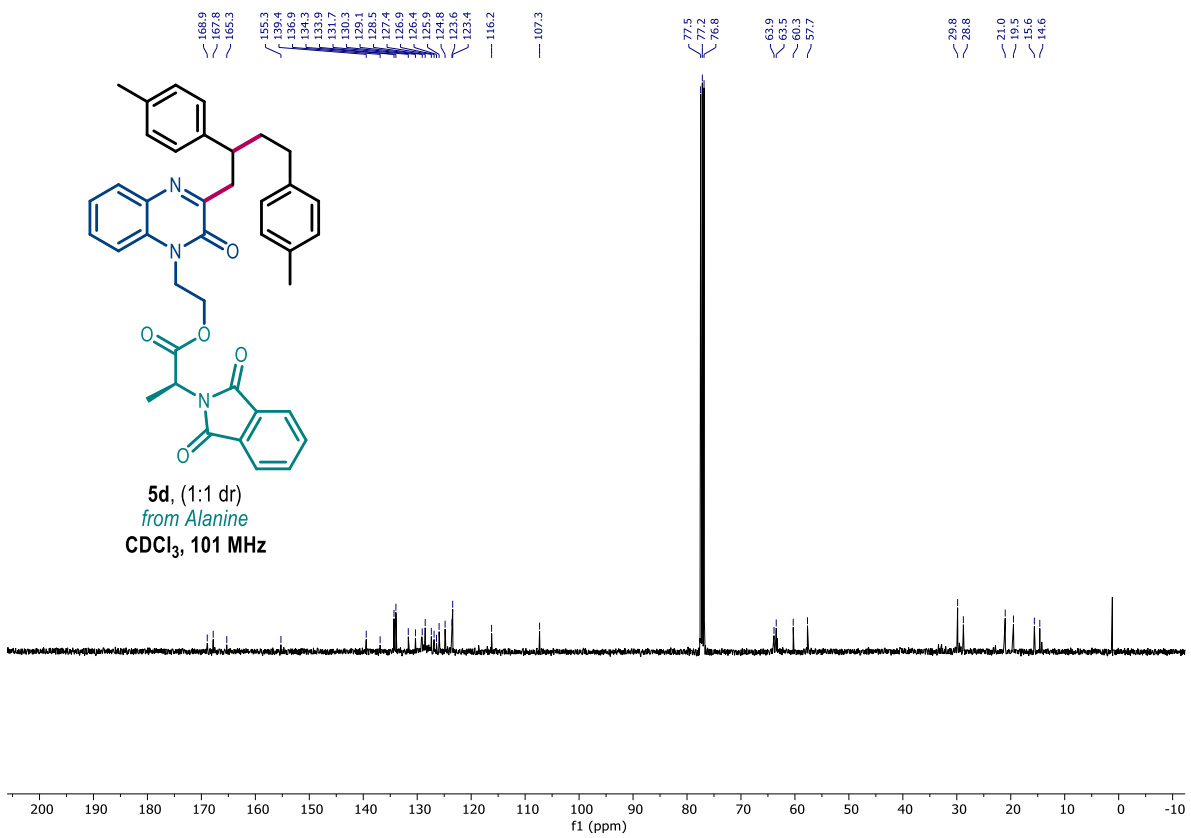

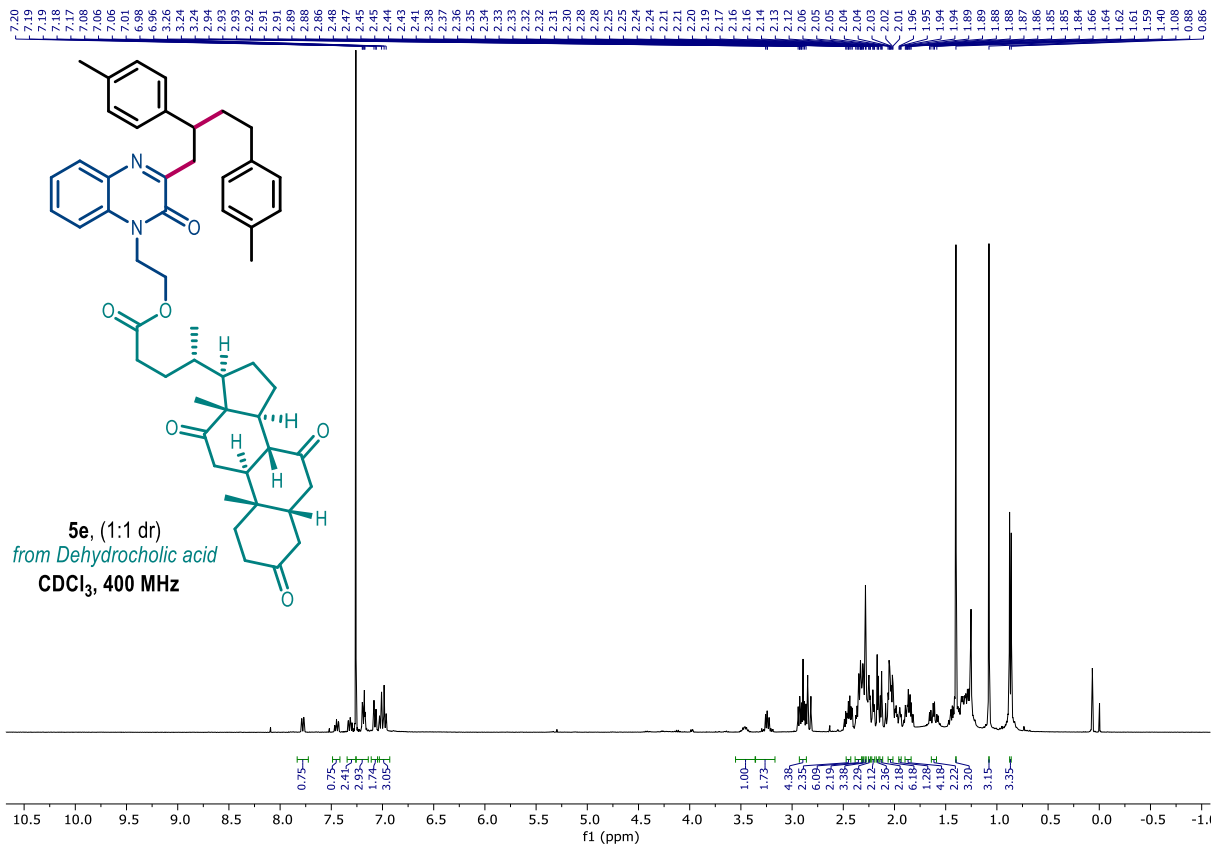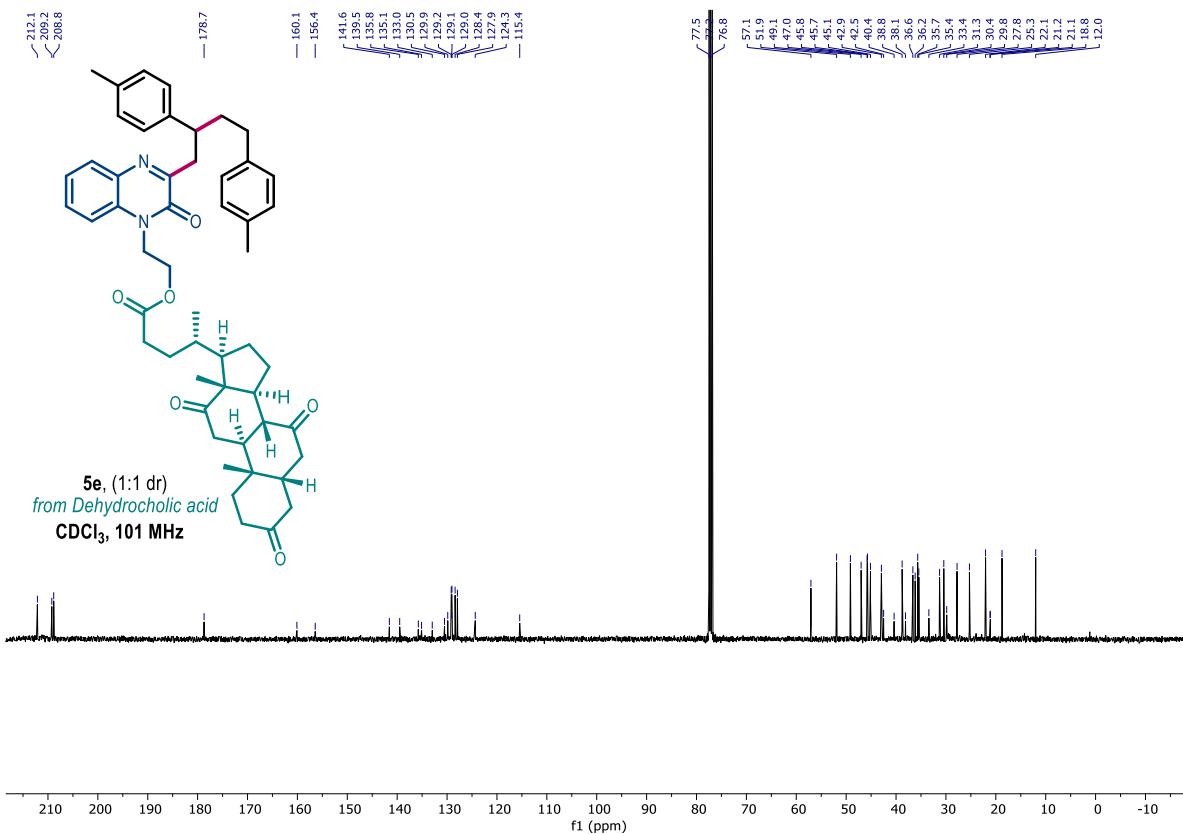

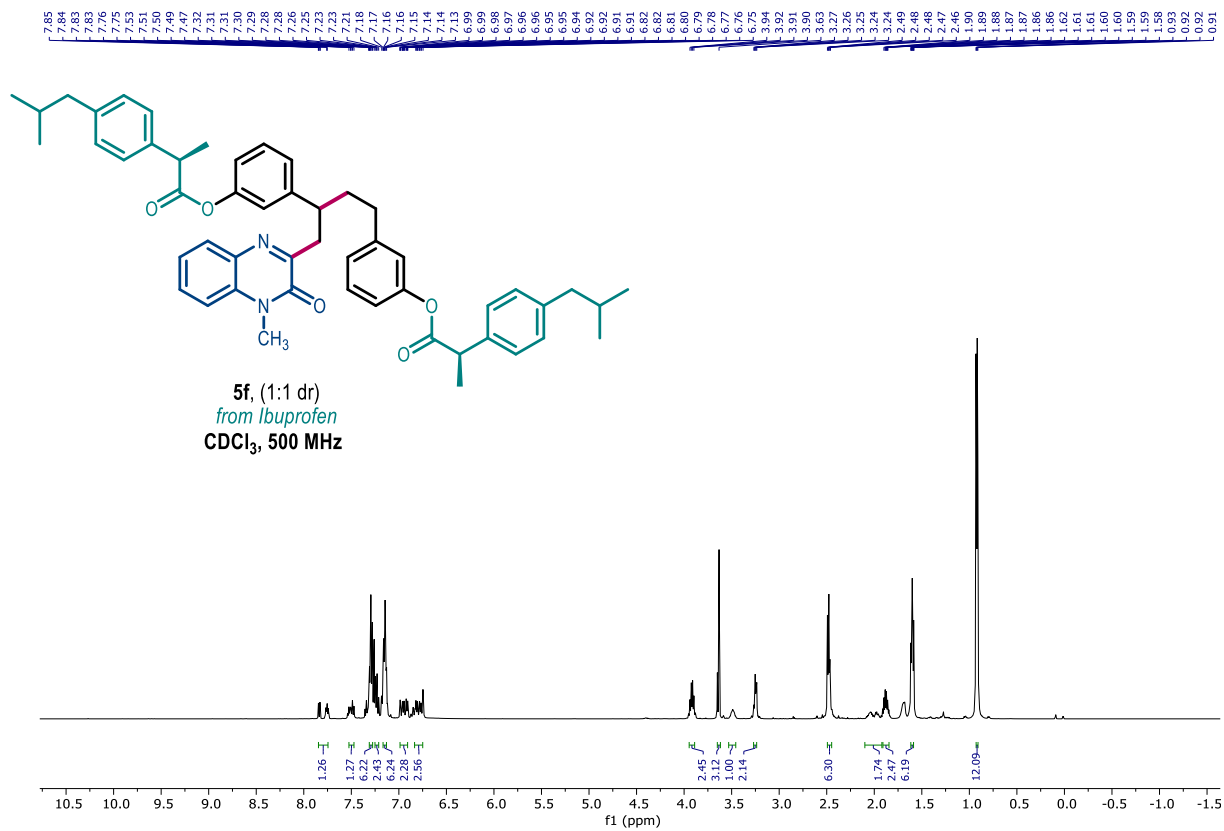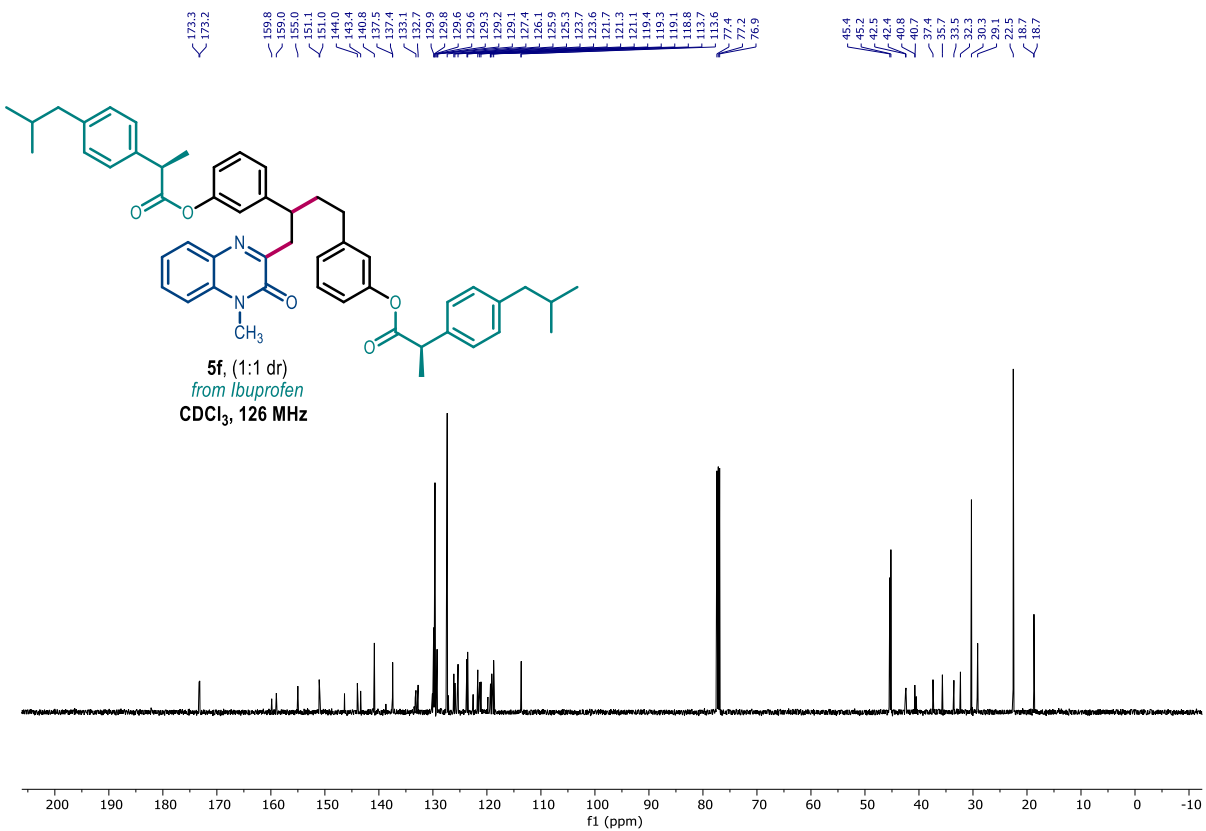



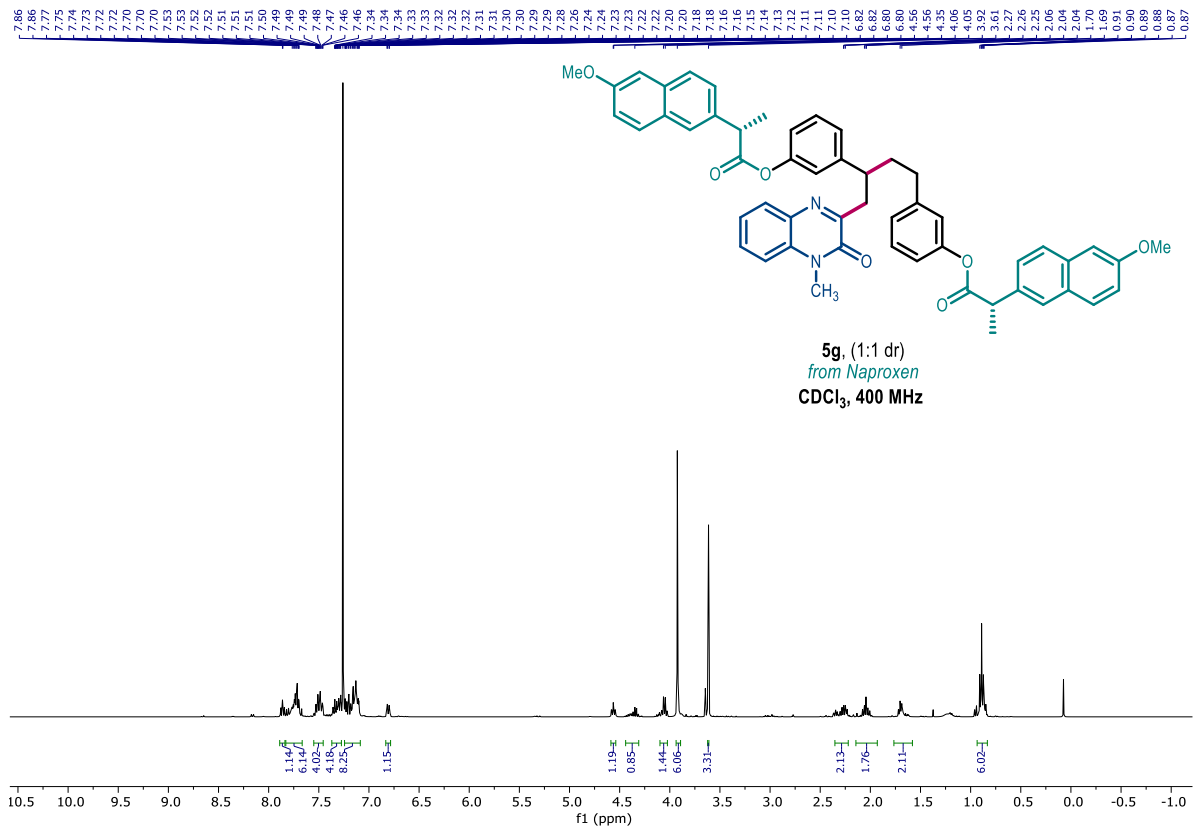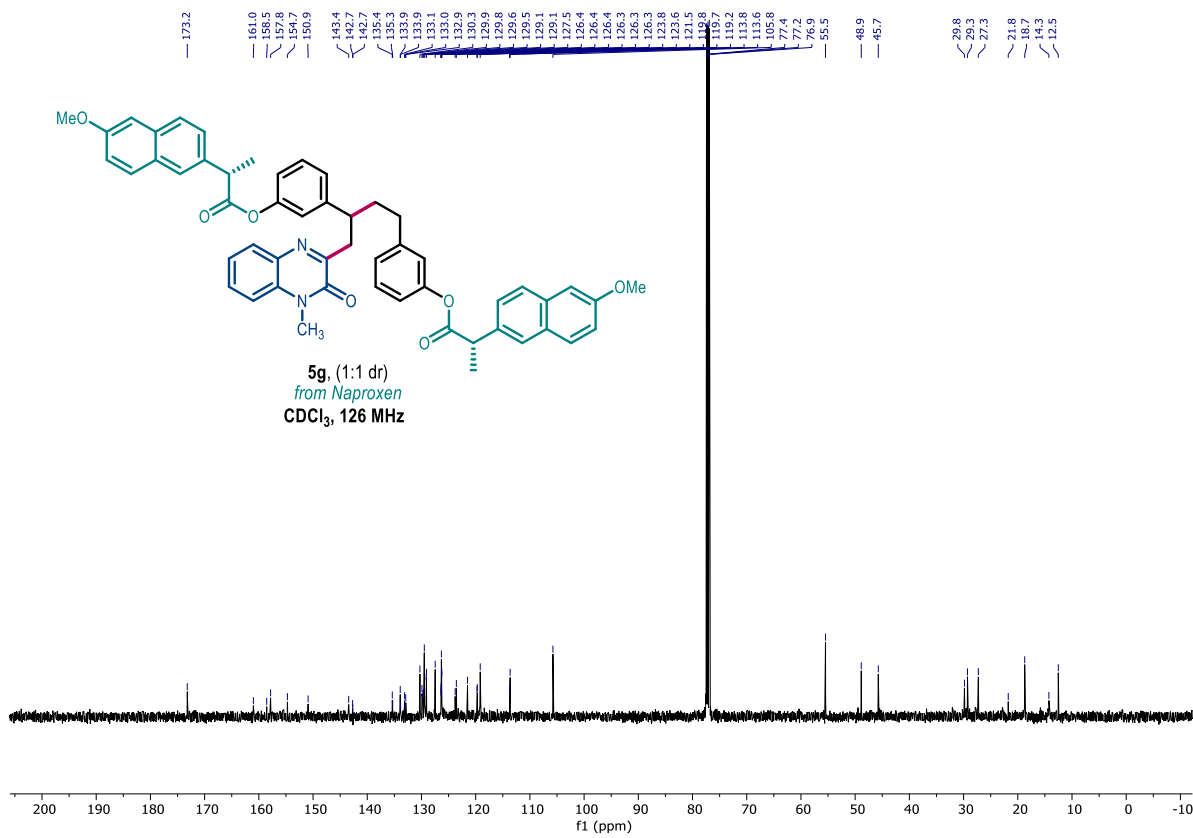



7.38  
7.36  
7.35  
7.34  
7.33  
7.32  
7.29  
7.28  
7.28  
7.28  
7.26  
7.24  
7.23  
7.22  
7.22  
7.21  
7.21  
7.20  
7.19  
7.19  
7.18  
7.17  
7.17  
7.17  
7.12  
7.11  
7.10  
7.09  
6.65  
6.65  
6.64  
6.63  
6.62  
6.60  
6.60  
6.58  
6.58  
6.52  
6.52  
6.51  
6.51  
6.50  
6.50  
6.49  
6.49  
6.47  
6.47  
6.45  
6.45  
6.16  
6.16  
6.14  
6.14  
3.15  
3.15  
2.87  
2.86  
2.86  
2.84  
2.84  
2.82  
2.82  
2.76  
2.76  
2.49  
2.48  
2.47  
2.46  
2.00  
2.00  
1.99  
1.98  
1.97  
1.97  
1.96  
1.95  
1.87  
1.87  
1.86  
1.85  
1.85  
1.84  
1.84  
1.83  
1.82  
1.81  
1.80  
1.79  
1.79

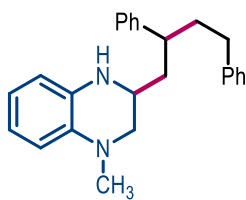

**6**, (1:1 dr)  
CDCl<sub>3</sub>, 400 MHz

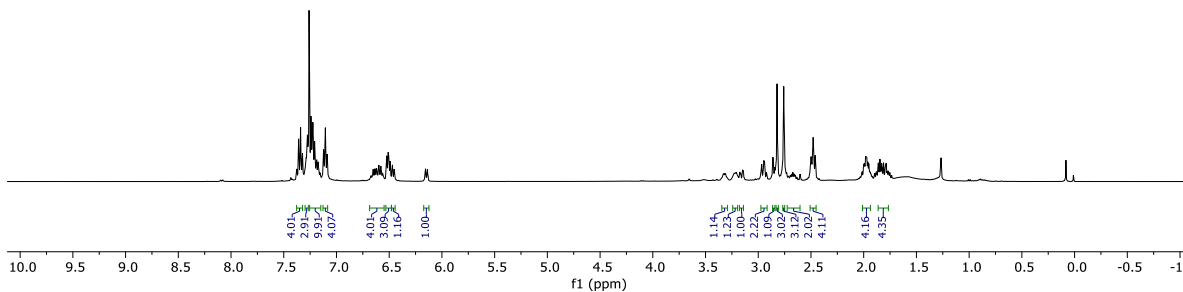

144.7  
144.4  
142.3  
142.3  
136.1  
135.9  
133.9  
133.9  
129.0  
128.5  
128.5  
128.5  
127.8  
126.8  
126.7  
126.7  
125.9  
118.8  
118.8  
118.3  
118.2  
113.6  
113.6  
111.6  
111.5  
77.5  
77.2  
76.8  
55.6  
55.5  
49.0  
43.2  
42.1  
41.9  
41.7  
39.2  
39.3  
39.1  
38.9  
33.8  
33.6

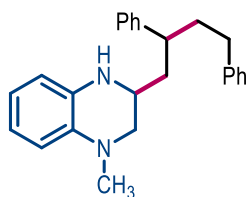

**6**, (1:1 dr)  
CDCl<sub>3</sub>, 101 MHz

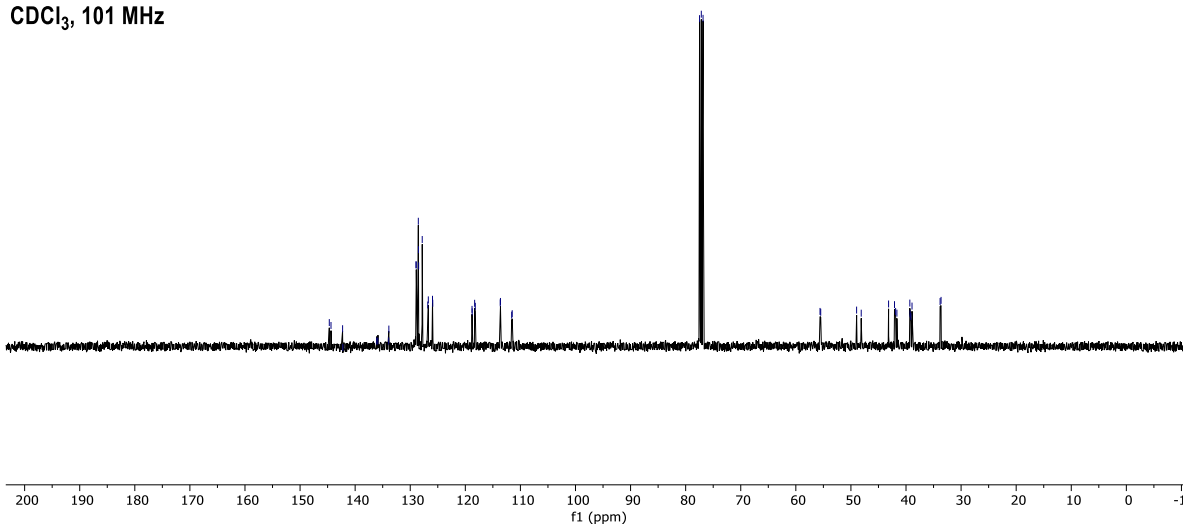

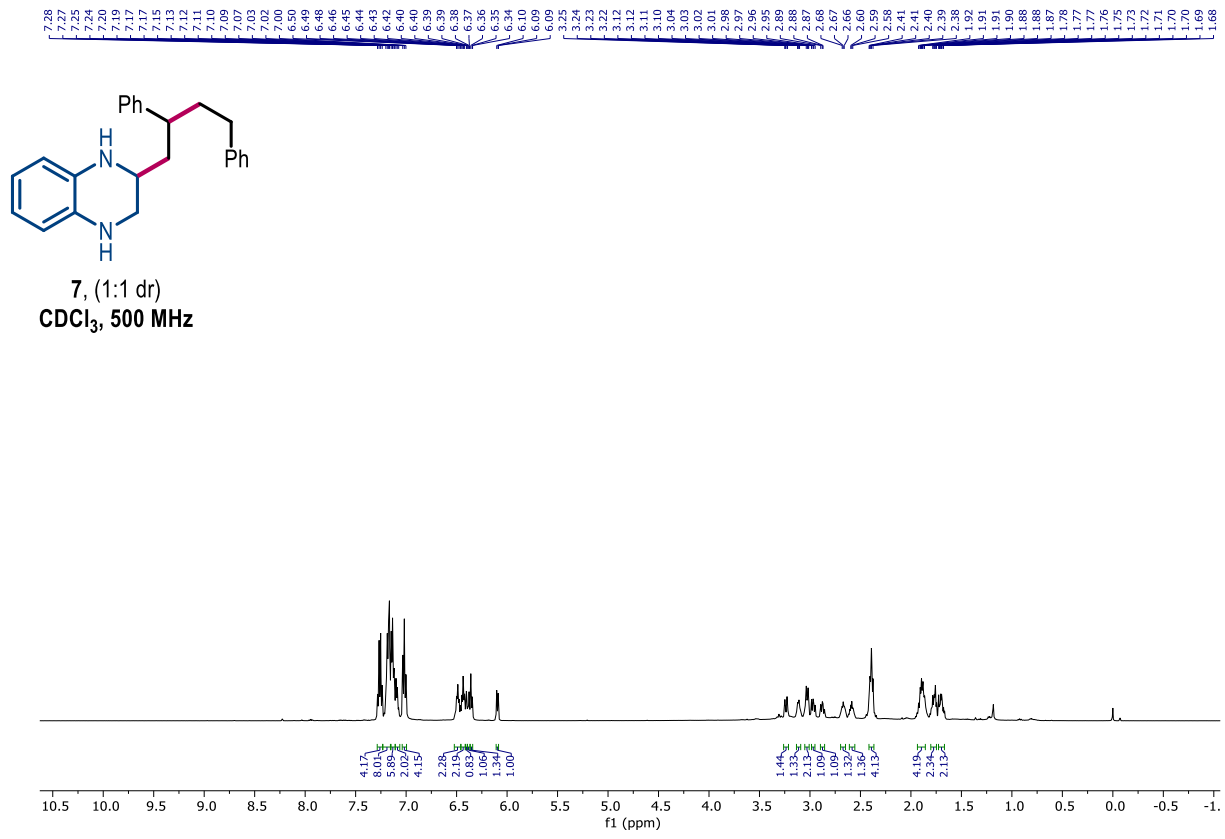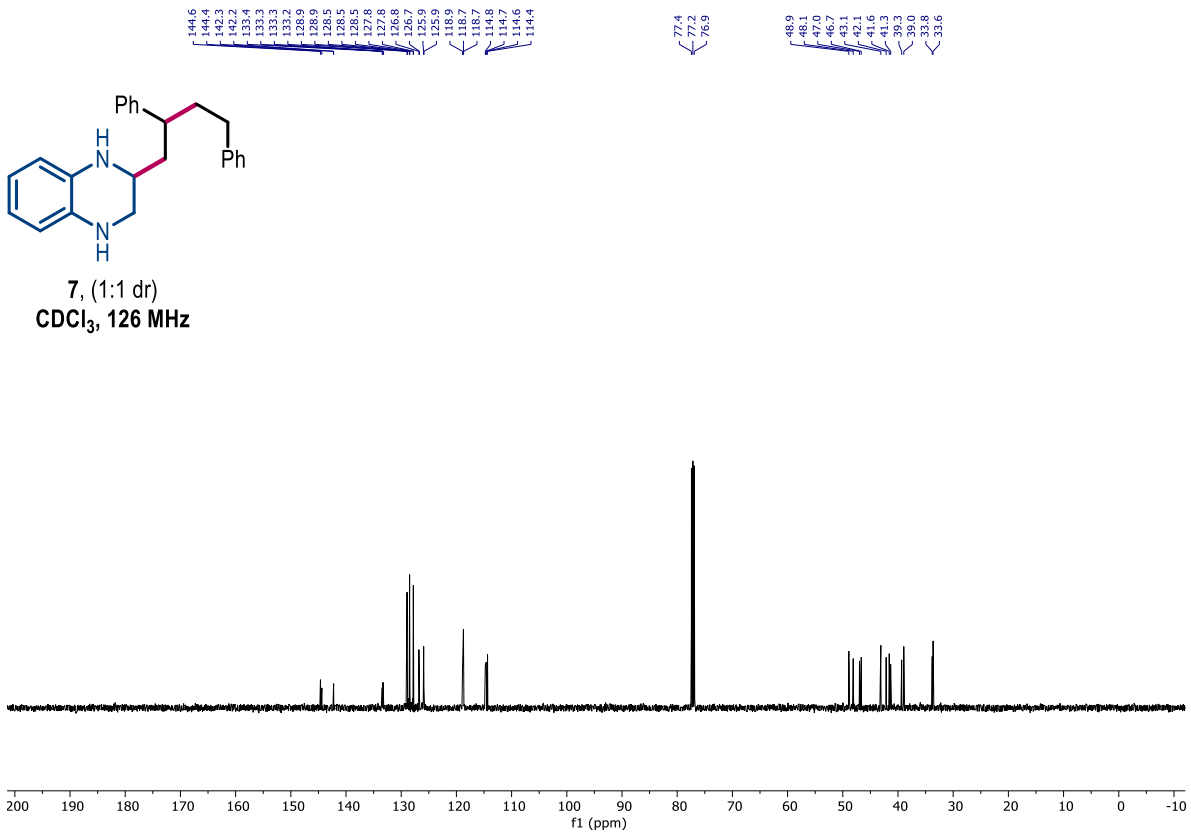

Supplement: d4cc05374e1.pdf [file d4cc05374e1.pdf]
